# Supplementary material for: Arbuscular Mycorrhizal Symbiosis Primes Tolerance to Cucumber Mosaic Virus in Tomato
Source: MDPI journal article supplement (doi:10.3390/v12060675), 2020-06-22
Supplement: s1 [file s1]

| Gene ID             | Description                                                   | primer forward 5'-3'  | primer reverse 5'-3'   |
|---------------------|---------------------------------------------------------------|-----------------------|------------------------|
| CMV_CP              | CMV coat protein                                              | TTATCCGTTGCCGCCATCTC  | TGTTGTTGGCTTGGACTCCA   |
| Solyc06g072570.1.1  | Ubiquitin Conjugating Enzyme                                  | ACCTGATGATCCACAAGATGC | GCAGCAAGTGTGGATGTTTTT  |
| Solyc12g100330.1.1  | chromomethylase 3                                             | GTCAAATTCCAAAGCGGAAG  | CGAAGCTCATCGCATAGTCA   |
| Solyc 10g052470.1.1 | Myb family transcription factor (fragment)                    | CTTCTGGATCATGGACTGCGA | CTGCTGTTTTGCCTCCAAC TG |
| Solyc02g094520.2.1  | Histone-lysine N-methyltransferase                            | GCCTGATCTAAAGGCGATTTC | GCGAAAAGAACTGATGACCAA  |
| Solyc 07g008240.2.1 | Non-symbiotic hemoglobin protein                              | TGGAAAGGTTGTGGTGAGGG  | AGTGCTCATCAACCACACCA   |
| Solyc 01g008150.1.1 | Unknown protein (AHRD V1)                                     | TACATGAACGGTGGTGAGCC  | CCGCGAAAAC TCCATCATCG  |
| Solyc 04g071800.2.1 | Cytochrome P450                                               | GGCTCATGGCTATTTGCATT  | GTGGGAGTGAACCAAGGAGA   |
| Solyc 10g085870.1.1 | UDP-glucosyltransferase family 1 protein                      | GGAACAAGGCTGCAATTGAT  | ACCATCTGAGACGTGGGAAG   |
| Solyc 09g092130.2.1 | Sucrose phosphate Synthase                                    | GGATCTTGCAGCACTCACAA  | AGGGTCTGGTCTGGACAATG   |
| Solyc 05g005280.2.1 | Poly polymerase catalytic domain containing protein expressed | GCTTGGTTTGGTTCTTCCAA  | CTTCCACTGCCGAAAATACC   |

**Table S1** List of primers used in this study
