# Supplementary material for: Arbuscular Mycorrhizal Symbiosis Primes Tolerance to Cucumber Mosaic Virus in Tomato
Source: MDPI journal article supplement (doi:10.3390/v12060675), 2020-06-22
Supplement: s1 [file s1]

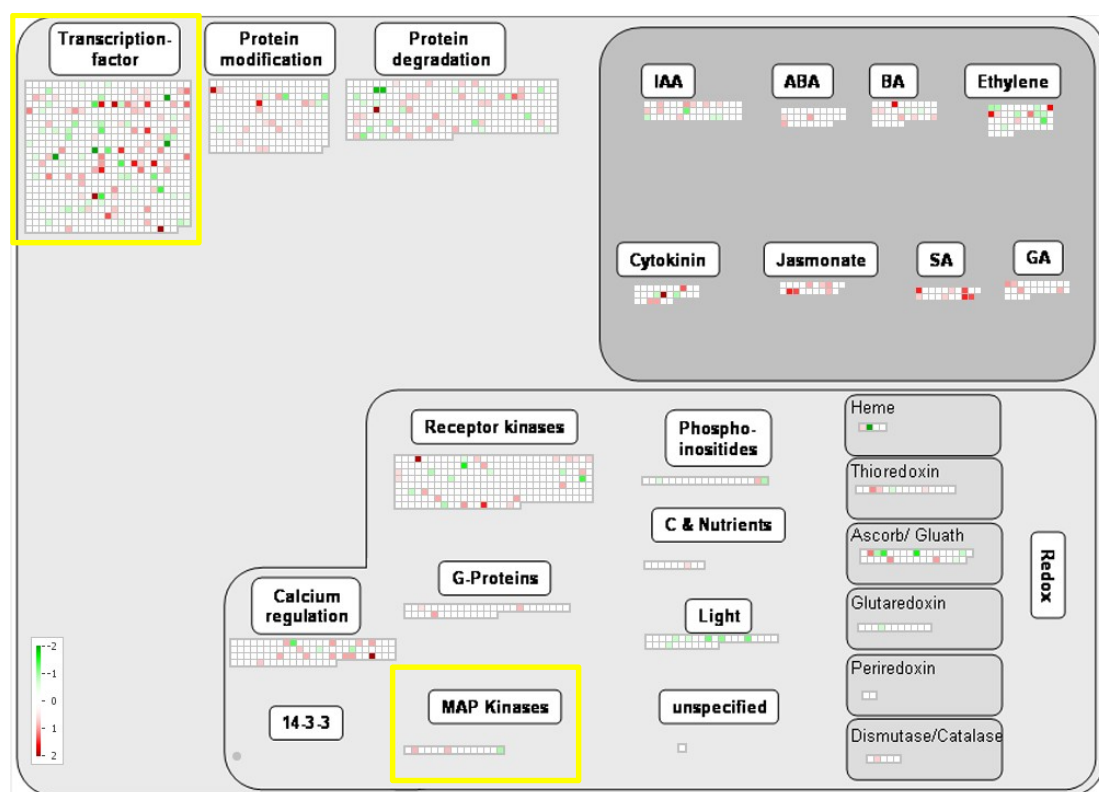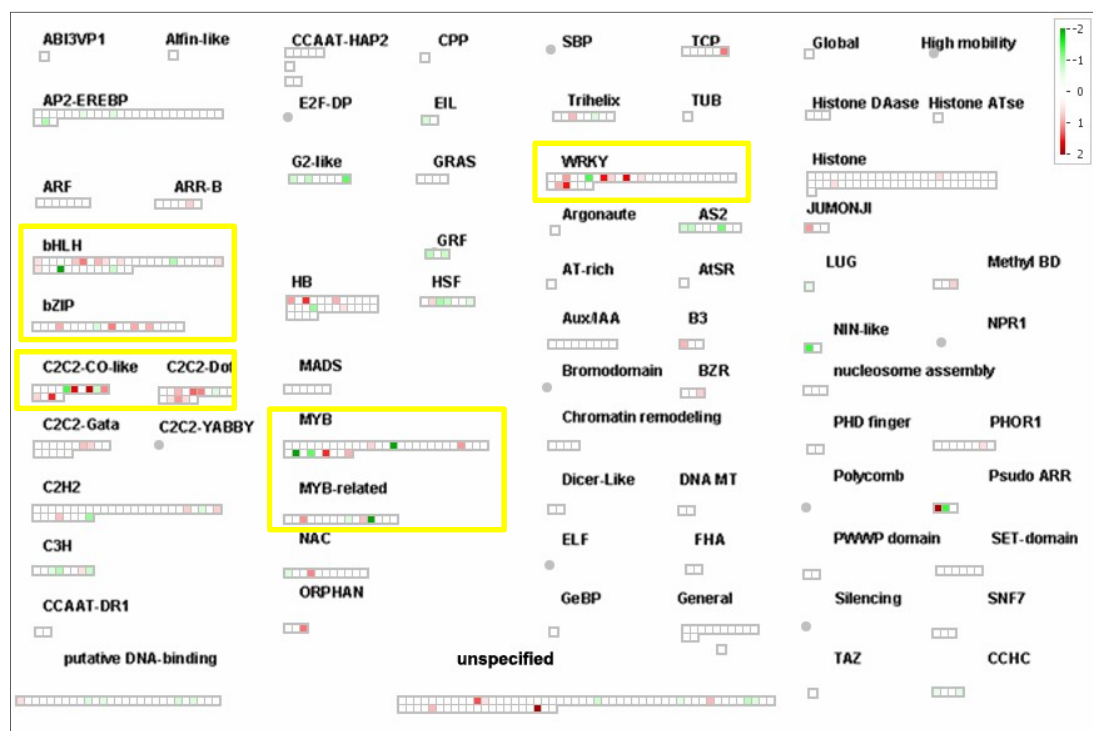

**Figure S5.** MapMan visualization of expression of transcription factor families in mycorrhizal (M) plants with respect to control (C) plants. Expression values are reported as the log2 of Fold Change (FC) in respect to control (C) plants
