# Supplementary material for: Arbuscular Mycorrhizal Symbiosis Primes Tolerance to Cucumber Mosaic Virus in Tomato
Source: MDPI journal article supplement (doi:10.3390/v12060675), 2020-06-22
Supplement: s1 [file s1]

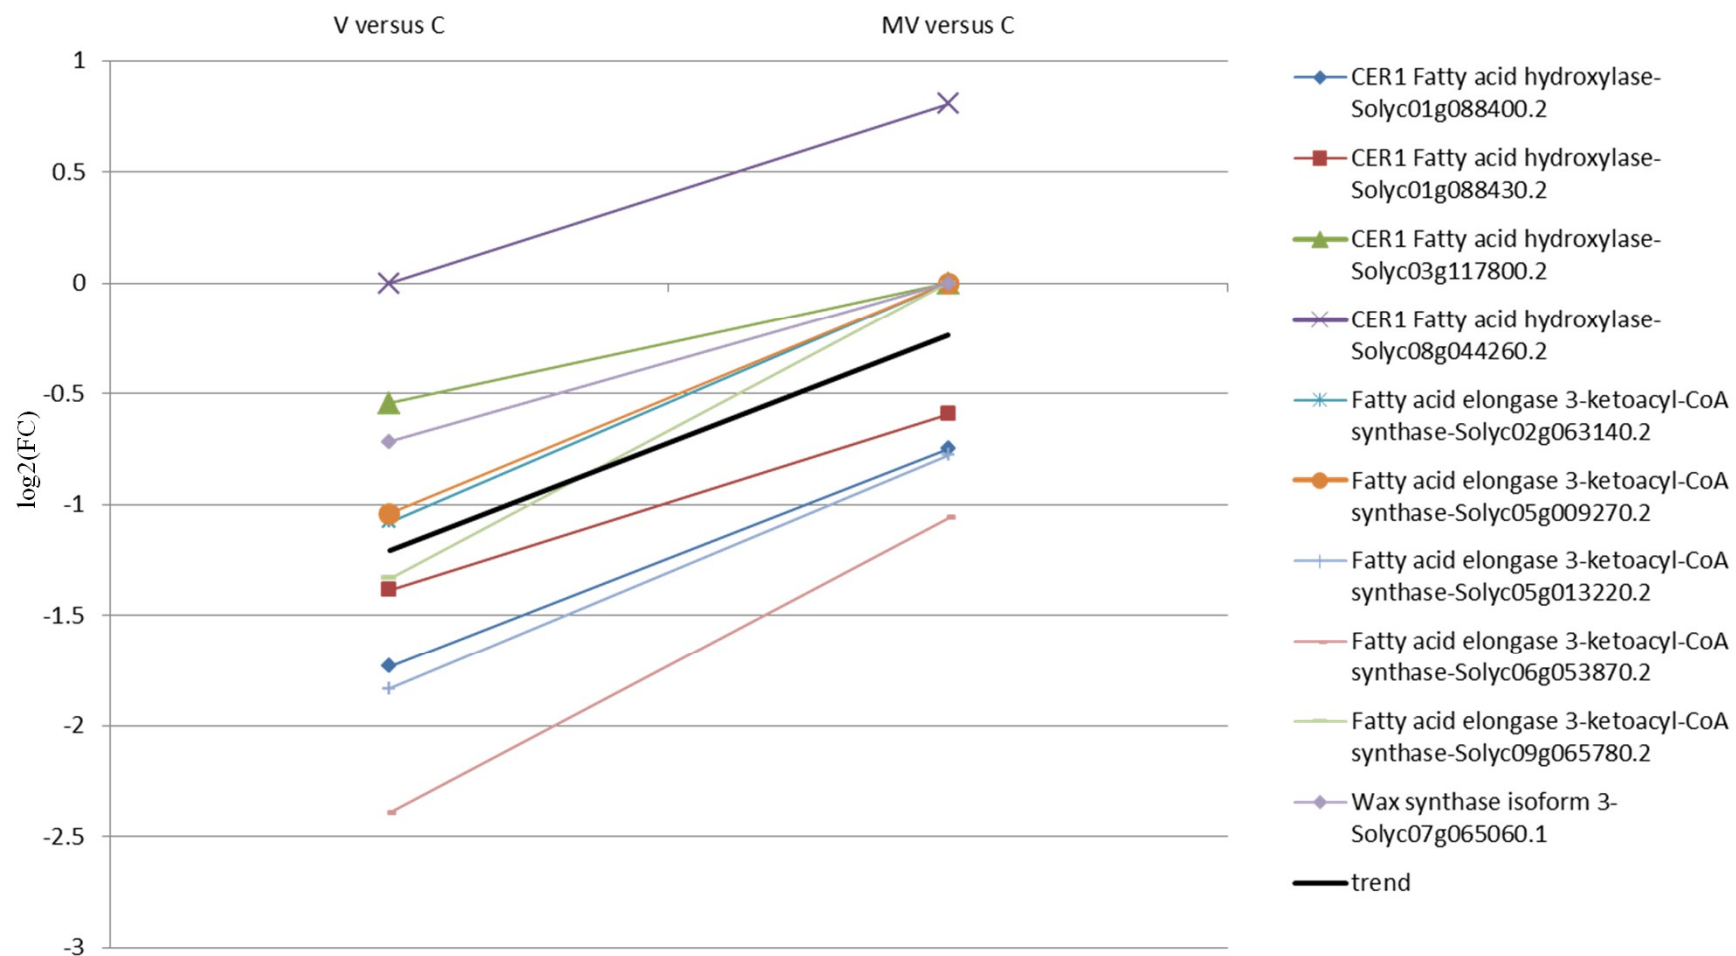

**Figure S4.** Regulation of DEGs involved in cuticular waxes synthesis in CMV-infected (V) and CMV-infected mycorrhizal plants (MV) plants in respect to control (C) plants. Expression values are reported as the log2 of Fold Change (FC) in respect to C plants. Black line indicates the regulation trend.
