# Supplementary material for: Arbuscular Mycorrhizal Symbiosis Primes Tolerance to Cucumber Mosaic Virus in Tomato
Source: MDPI journal article supplement (doi:10.3390/v12060675), 2020-06-22
Supplement: s1 [file s1]

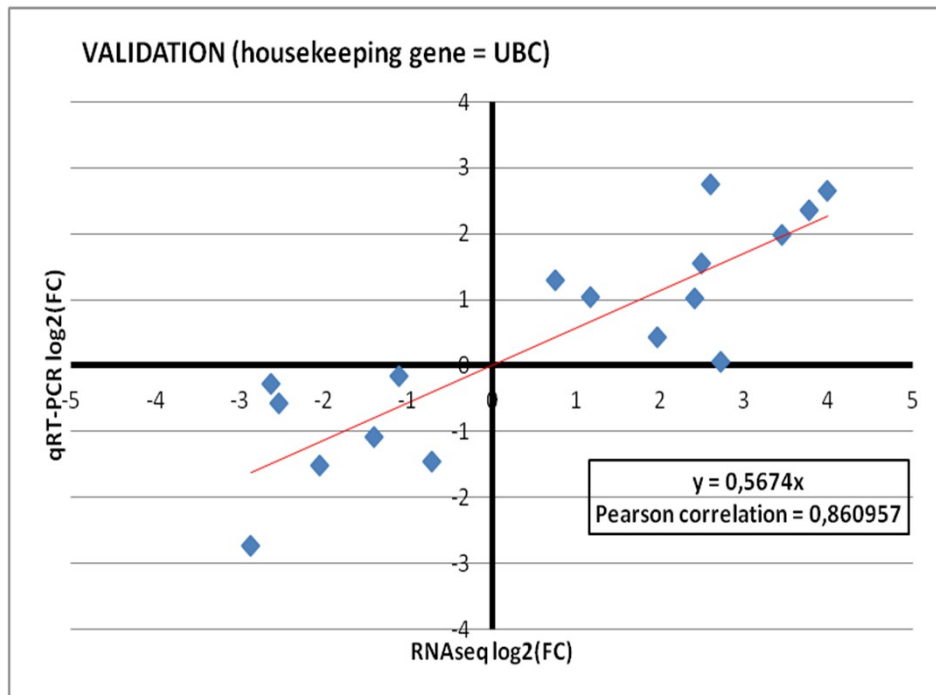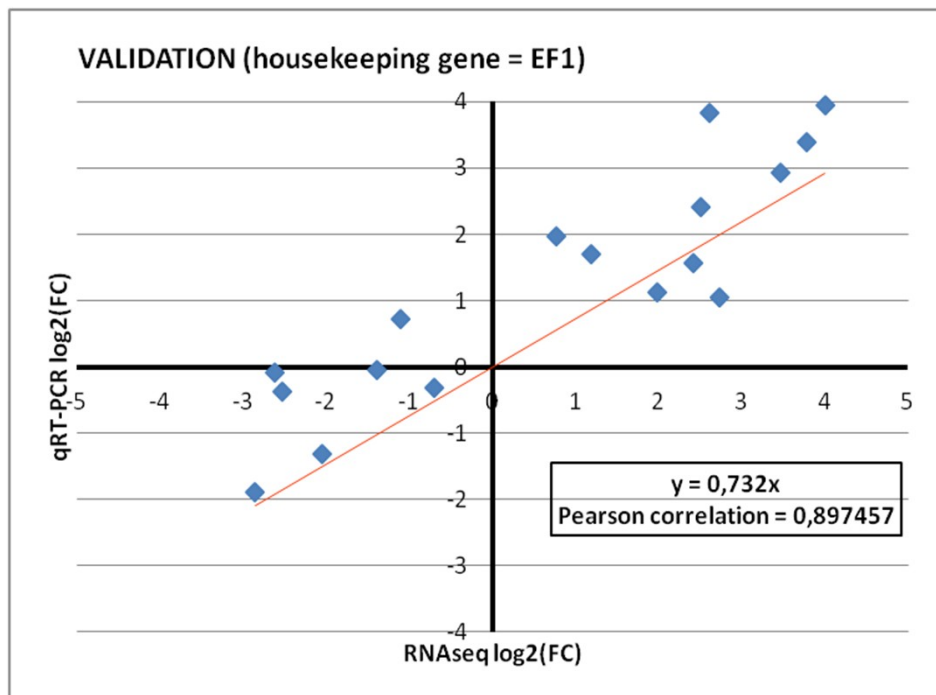

**Figure S1.** Correlation between expression values measured by RNAseq and qRT-PCR. Expression values are reported as the log2 of Fold Change (FC) in respect to C plants.
