# Supplementary material for: Arbuscular Mycorrhizal Symbiosis Primes Tolerance to Cucumber Mosaic Virus in Tomato
Source: MDPI journal article supplement (doi:10.3390/v12060675), 2020-06-22
Supplement: s1 [file s1]

## Ethylene related genes

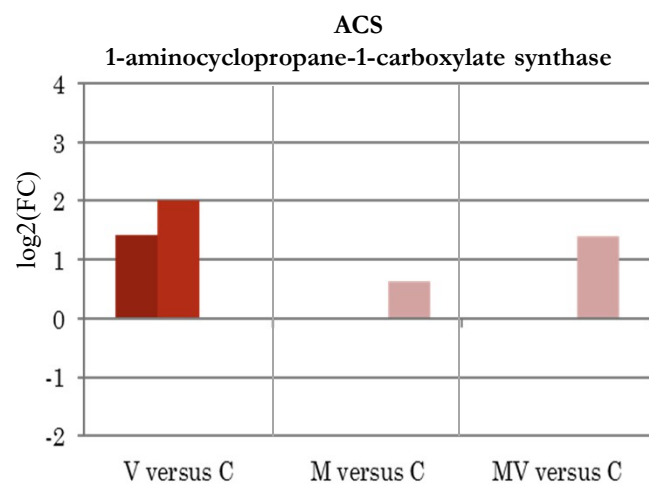

## Auxin related genes

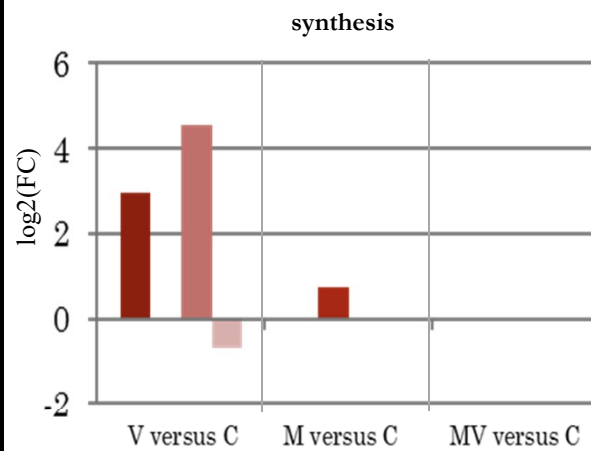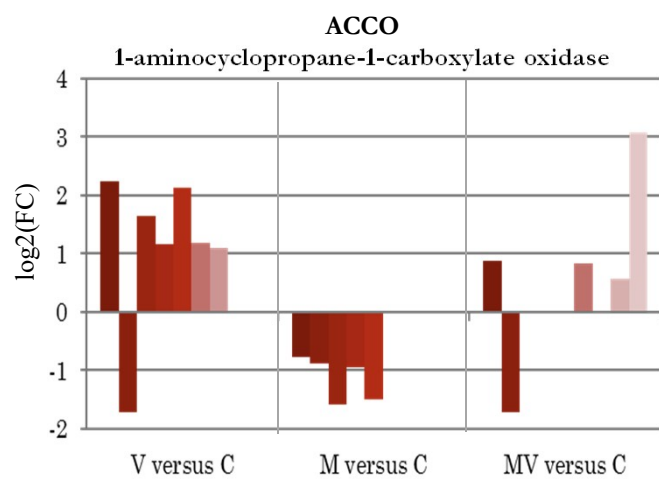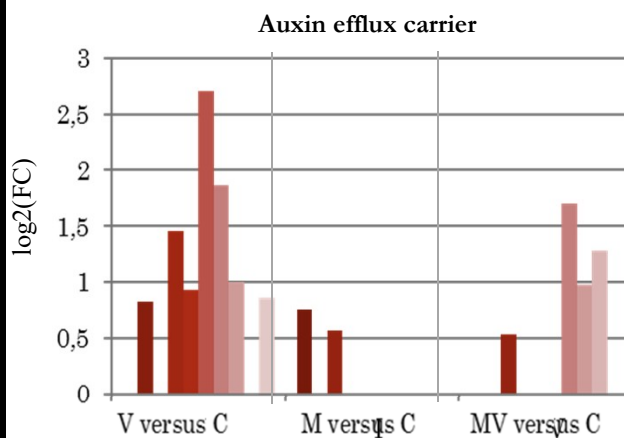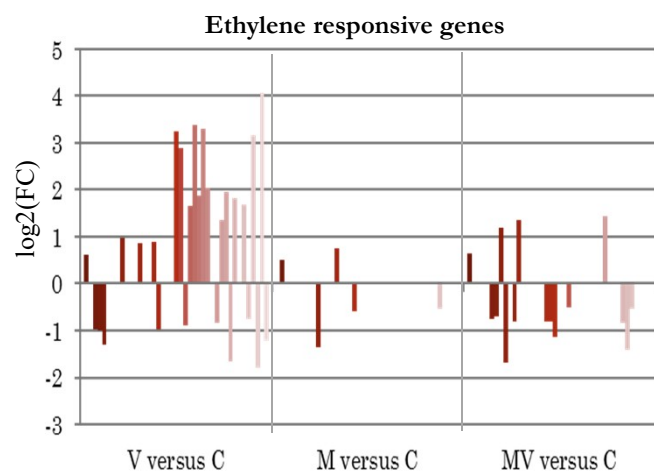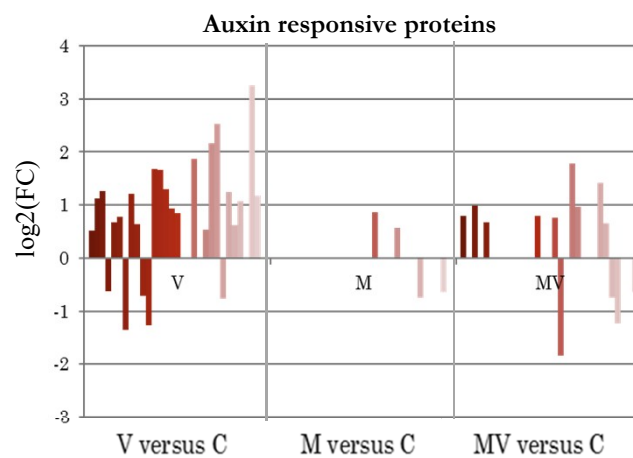

## Jasmonate related genes

JA synthesis

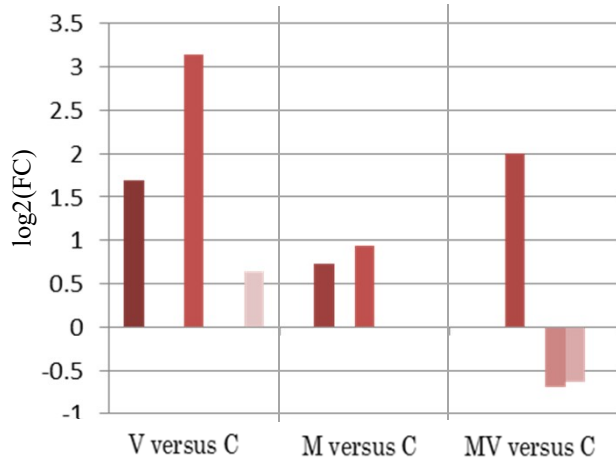

Conversion from JA to JA-isoleucine conjugate

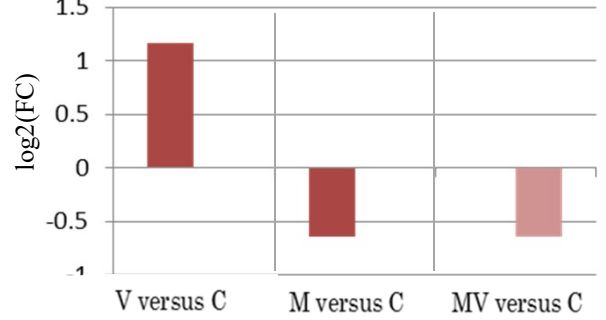

Conversion from MeJA to JA and viceversa

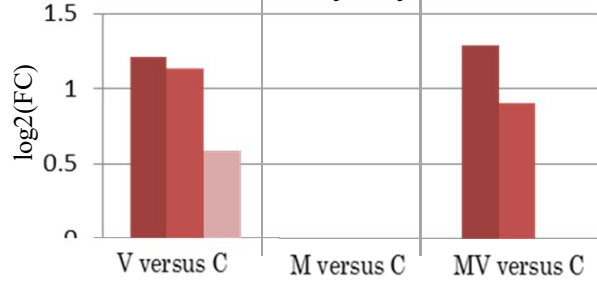

JA response

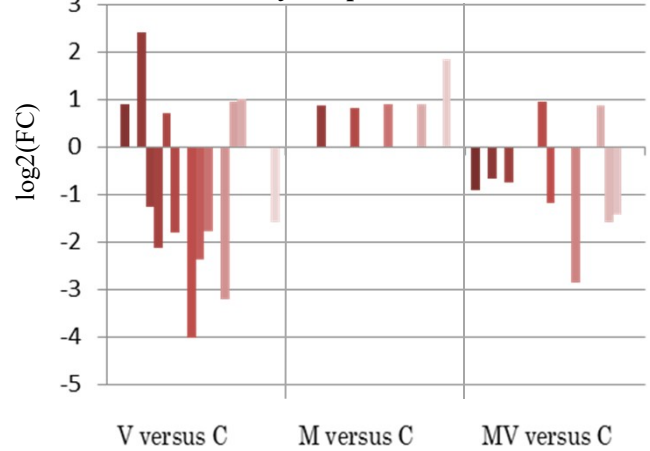

## Salicylic acid related genes

### SA synthesis

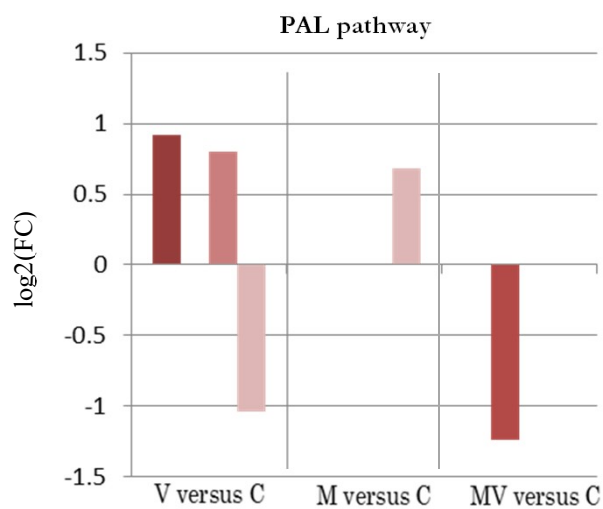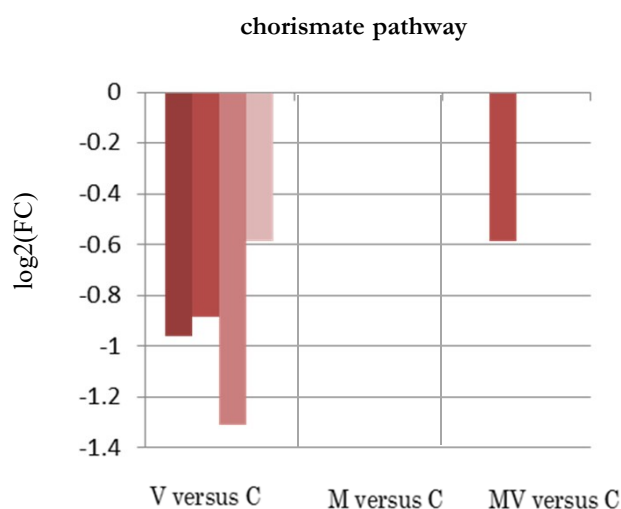

### SA – MeSA conversion

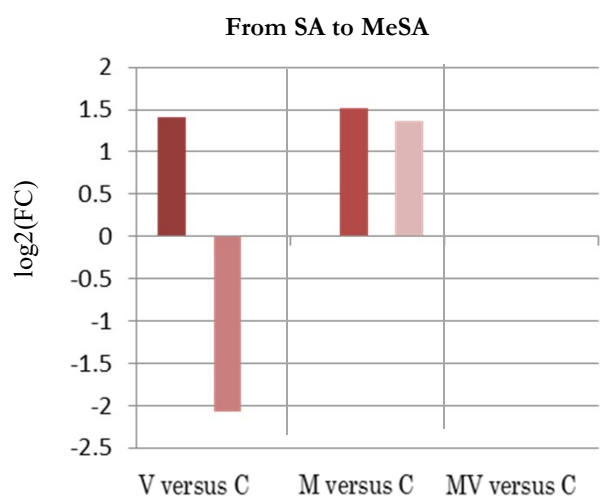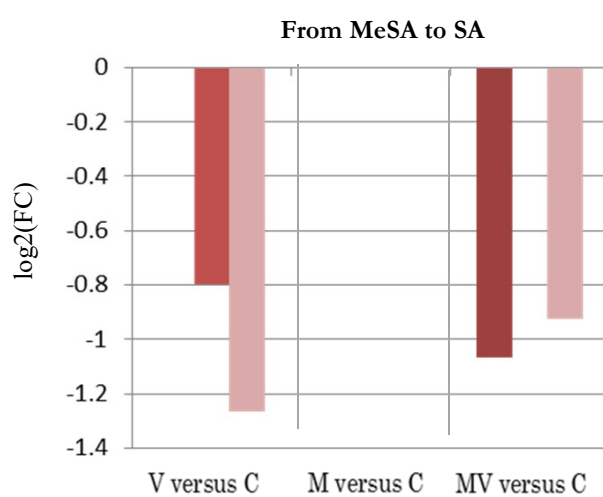

### SA response

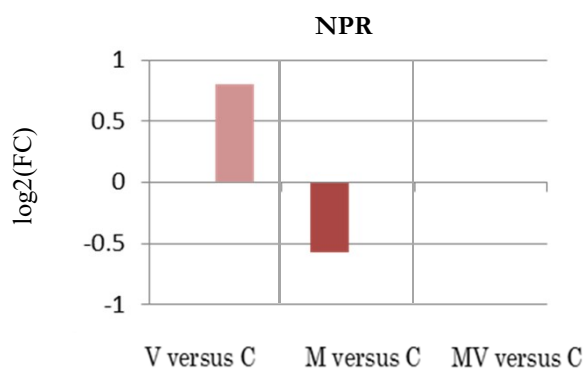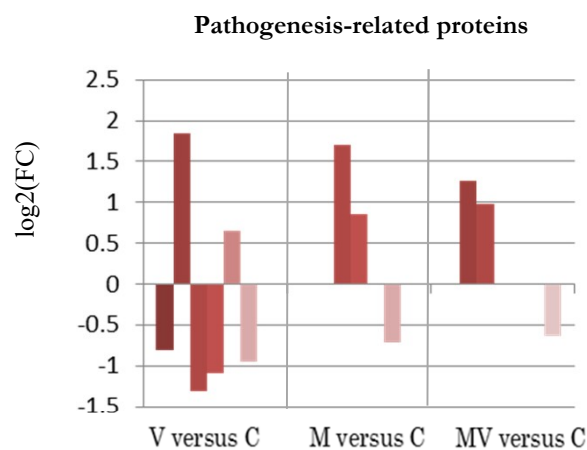

### Gibberellins related genes

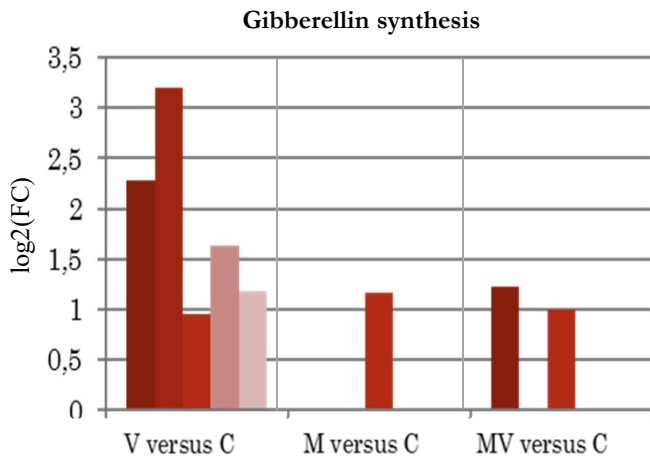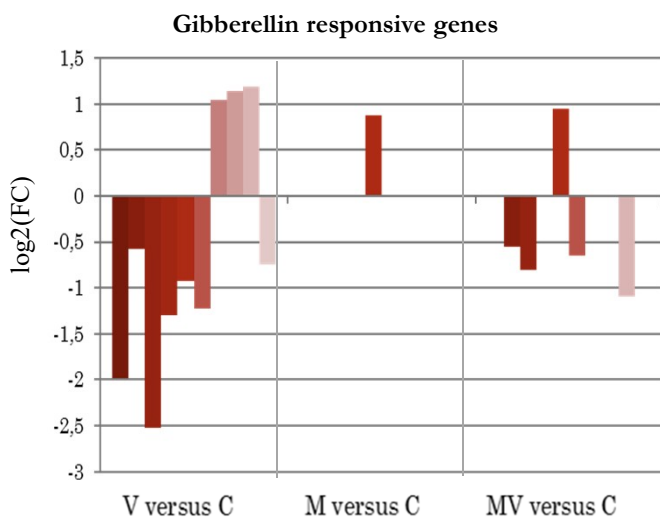

### Cytokinins related genes

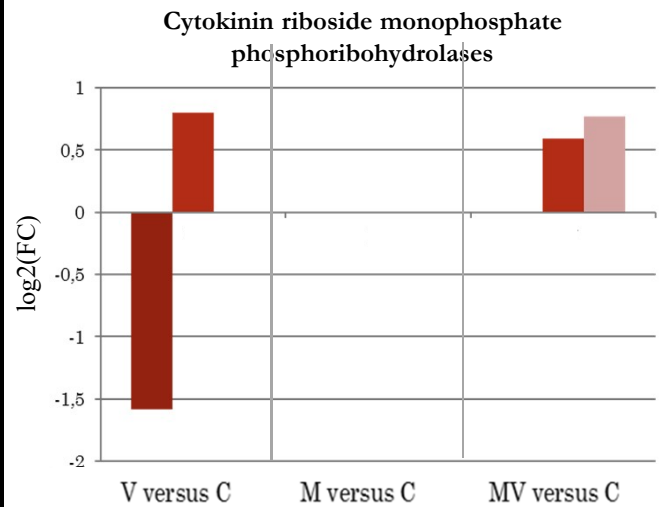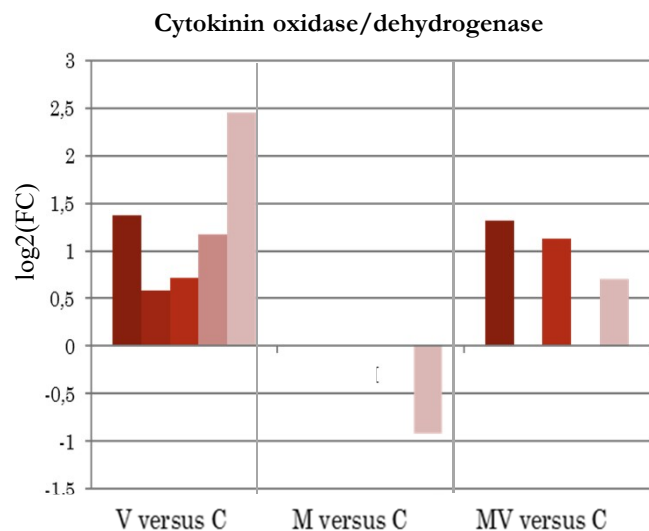

**Figure S3.** Expression of DEGs related to hormones-related functional categories in virus-infected (V), mycorrhizal (M) and virus-infected mycorrhizal (MV) plants with respect to control (C) plants. Expression values are reported as the log2 of Fold Change (FC) in respect to control (C) plants.
