# Supplementary material for: Arbuscular Mycorrhizal Symbiosis Primes Tolerance to Cucumber Mosaic Virus in Tomato
Source: MDPI journal article supplement (doi:10.3390/v12060675), 2020-06-22
Supplement: s1 [file s1]

a)

| Gene ID            | Description                                                   | RNA-seq |       |       | qRT-PCR    |            |            |
|--------------------|---------------------------------------------------------------|---------|-------|-------|------------|------------|------------|
|                    |                                                               | V       | M     | MV    | V          | M          | MV         |
| Solyc10g052470.1.1 | Myb family transcription factor                               | 2.49    | -2.62 | -     | 1.55±0.24  | -0.27±0.38 | -          |
| Solyc12g100330.1.1 | chromomethylase 3                                             | -1.39   | -     | -     | -1.08±0.17 | -          | -          |
| Solyc02g094520.2.1 | Histone-lysine N-methyltransferase                            | -0.71   | -     | -     | -1.46±0.10 | -          | -          |
| Solyc07g008240.2.1 | Non-symbiotic hemoglobin protein                              | -       | -2.05 | -2.86 | -          | -1.51±0.33 | -2.74±0.17 |
| Solyc04g071800.2.1 | Cytochrome P450                                               | 1.18    | -2.53 | -1.11 | 1.04±0.30  | -0.57±0.36 | -0.16±0.22 |
| Solyc05g005280.2.1 | Poly polymerase catalytic domain containing protein expressed | 2.61    | 2.73  | 4.00  | 2.75±0.21  | 0.05±0.19  | 2.66±0.15  |
| Solyc10g085870.1.1 | UDP-glucosyltransferase family 1 protein                      | 0.76    | 2.42  | 3.78  | 1.29±0.28  | 1.01±0.19  | 2.35±0.21  |
| Solyc09g092130.2.1 | Sucrose phosphate synthase                                    | -       | 1.98  | 3.45  | -          | 0.42±0.17  | 1.99±0.18  |

b)

| Gene ID            | Descrizione                                                   | RNA-seq |       |       | qRT-PCR    |            |            |
|--------------------|---------------------------------------------------------------|---------|-------|-------|------------|------------|------------|
|                    |                                                               | V       | M     | MV    | V          | M          | MV         |
| Solyc10g052470.1.1 | Myb family transcription factor                               | 2.49    | -2.62 | -     | 2.41±0.19  | -0.08±0.17 | -          |
| Solyc12g100330.1.1 | chromomethylase 3                                             | -1.39   | -     | -     | -0.05±0.16 | -          | -          |
| Solyc02g094520.2.1 | Histone-lysine N-methyltransferase                            | -0.71   | -     | -     | -0.31±0.18 | -          | -          |
| Solyc07g008240.2.1 | Non-symbiotic hemoglobin protein                              | -       | -2.05 | -2.86 | -          | -1.31±0.17 | -1.89±0.09 |
| Solyc04g071800.2.1 | Cytochrome P450                                               | 1.18    | -2.53 | -1.11 | 1.70±0.19  | -0.36±0.16 | 0.72±0.21  |
| Solyc05g005280.2.1 | Poly polymerase catalytic domain containing protein expressed | 2.61    | 2.73  | 4.00  | 3.84±0.19  | 1.04±0.20  | 3.95±0.21  |
| Solyc10g085870.1.1 | UDP-glucosyltransferase family 1 protein                      | 0.76    | 2.42  | 3.78  | 1.98±0.19  | 1.58±0.12  | 3.40±0.26  |
| Solyc09g092130.2.1 | Sucrose phosphate synthase                                    | -       | 1.98  | 3.45  | -          | 1.13±0.19  | 2.94±0.19  |

**Table S9** Validation of mRNA-seq results by qRT-PCR; expression values are reported as the log<sub>2</sub> of Fold Change in respect to C plants; (a) ubiquitin conjugating enzyme and (b) Elongation factor 1 were used as reference genes
