# Supplementary material for: Arbuscular Mycorrhizal Symbiosis Primes Tolerance to Cucumber Mosaic Virus in Tomato
Source: MDPI journal article supplement (doi:10.3390/v12060675), 2020-06-22
Supplement: s1 [file s1]

**Table S7** mRNA-seq read statistics

| <b>Samples</b> | <b>Total reads</b> | <b>Mapped read</b>    | <b>Transcriptome coverage</b> | <b>Uniquely mapped reads</b> | <b>Multiple mapped reads</b> |
|----------------|--------------------|-----------------------|-------------------------------|------------------------------|------------------------------|
| C_1            | 10,552,060         | 8,660,453<br>(82.1%)  | 15x                           | 8,483,613                    | 176,840                      |
| C_2            | 10,117,165         | 8,187,582<br>(80.9%)  | 15x                           | 7,942,025                    | 245,557                      |
| C_3            | 15,221,311         | 12,708,561<br>(83.5%) | 23x                           | 12,377,330                   | 331,231                      |
| V_1            | 17,436,750         | 14,785,997<br>(84.8%) | 26x                           | 14,546,406                   | 239,591                      |
| V_2            | 14,596,457         | 12,384,474<br>(84.8%) | 22x                           | 12,173,062                   | 211,412                      |
| V_3            | 16,310,309         | 13,854,892<br>(84.9%) | 25x                           | 13,645,742                   | 209,150                      |
| M_1            | 14,373,229         | 11,815,972<br>(82.2%) | 21x                           | 11,521,651                   | 294,321                      |
| M_2            | 18,210,733         | 15,218,574<br>(83.6%) | 27x                           | 14,935,259                   | 283,315                      |
| M_3            | 20,234,902         | 14,220,456<br>(70.3%) | 25x                           | 13,807,572                   | 412,884                      |
| MV_1           | 14,358,409         | 12,041,203<br>(83.9%) | 22x                           | 11,815,102                   | 226,101                      |
| MV_2           | 15,085,717         | 12,738,156<br>(84.4%) | 23x                           | 12,529,088                   | 209,068                      |
| MV_3           | 16,975,460         | 14,294,838<br>(84.2%) | 26x                           | 14,071,320                   | 223,518                      |
