# Supplementary material for: Arbuscular Mycorrhizal Symbiosis Primes Tolerance to Cucumber Mosaic Virus in Tomato
Source: MDPI journal article supplement (doi:10.3390/v12060675), 2020-06-22
Supplement: s1 [file s1]

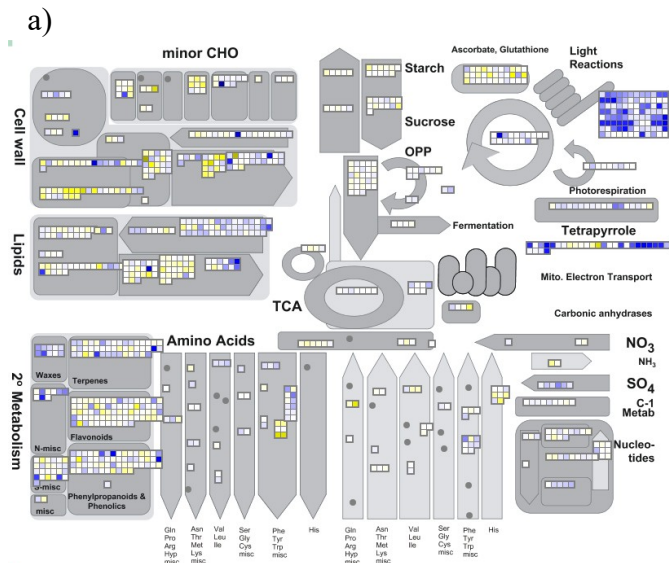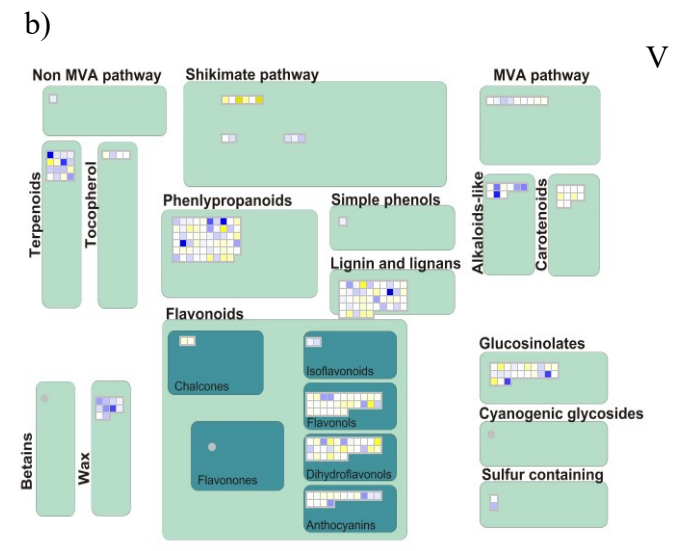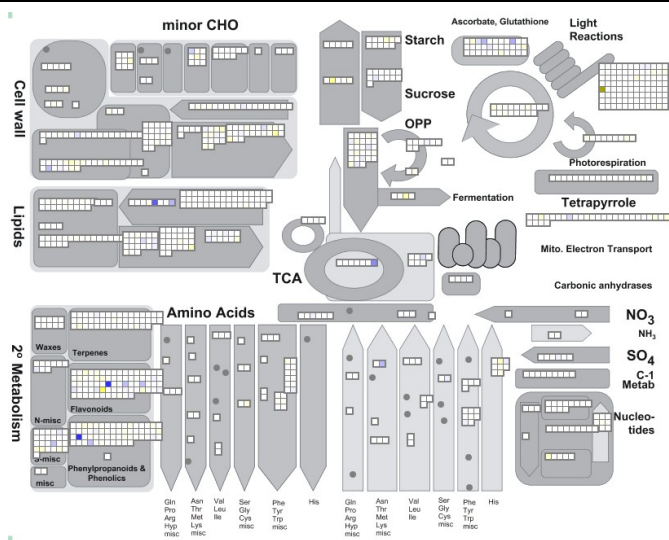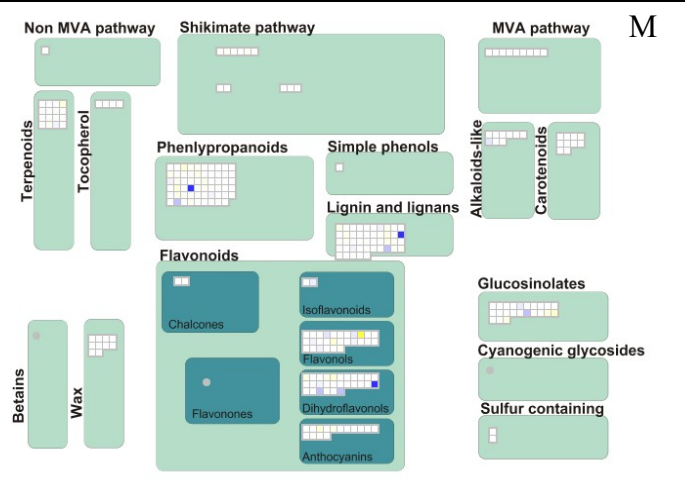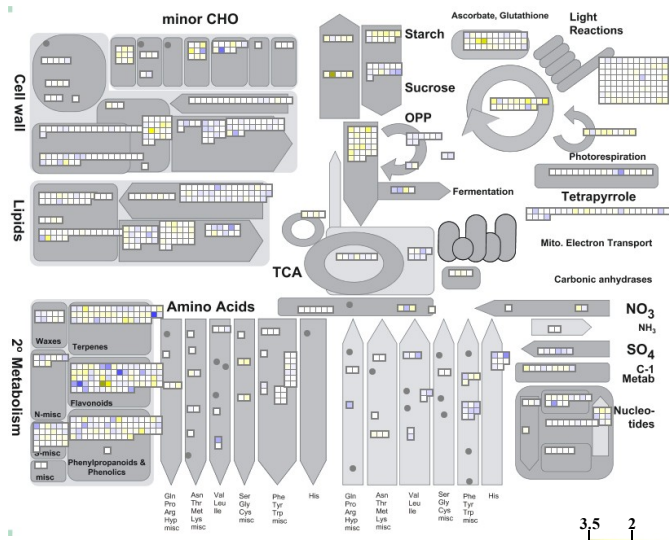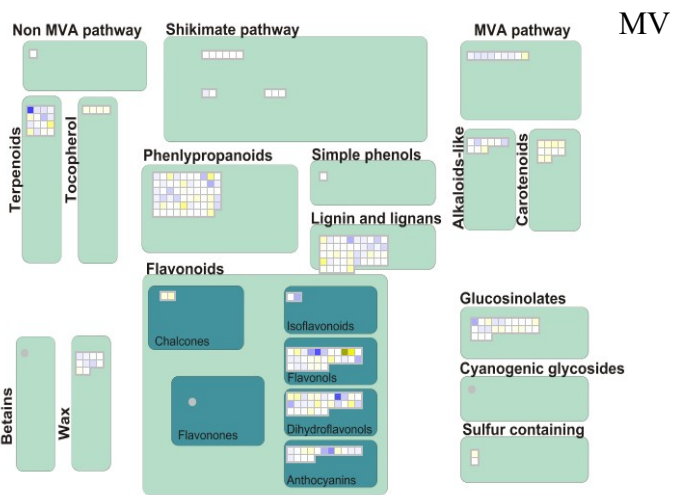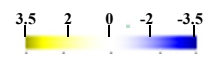

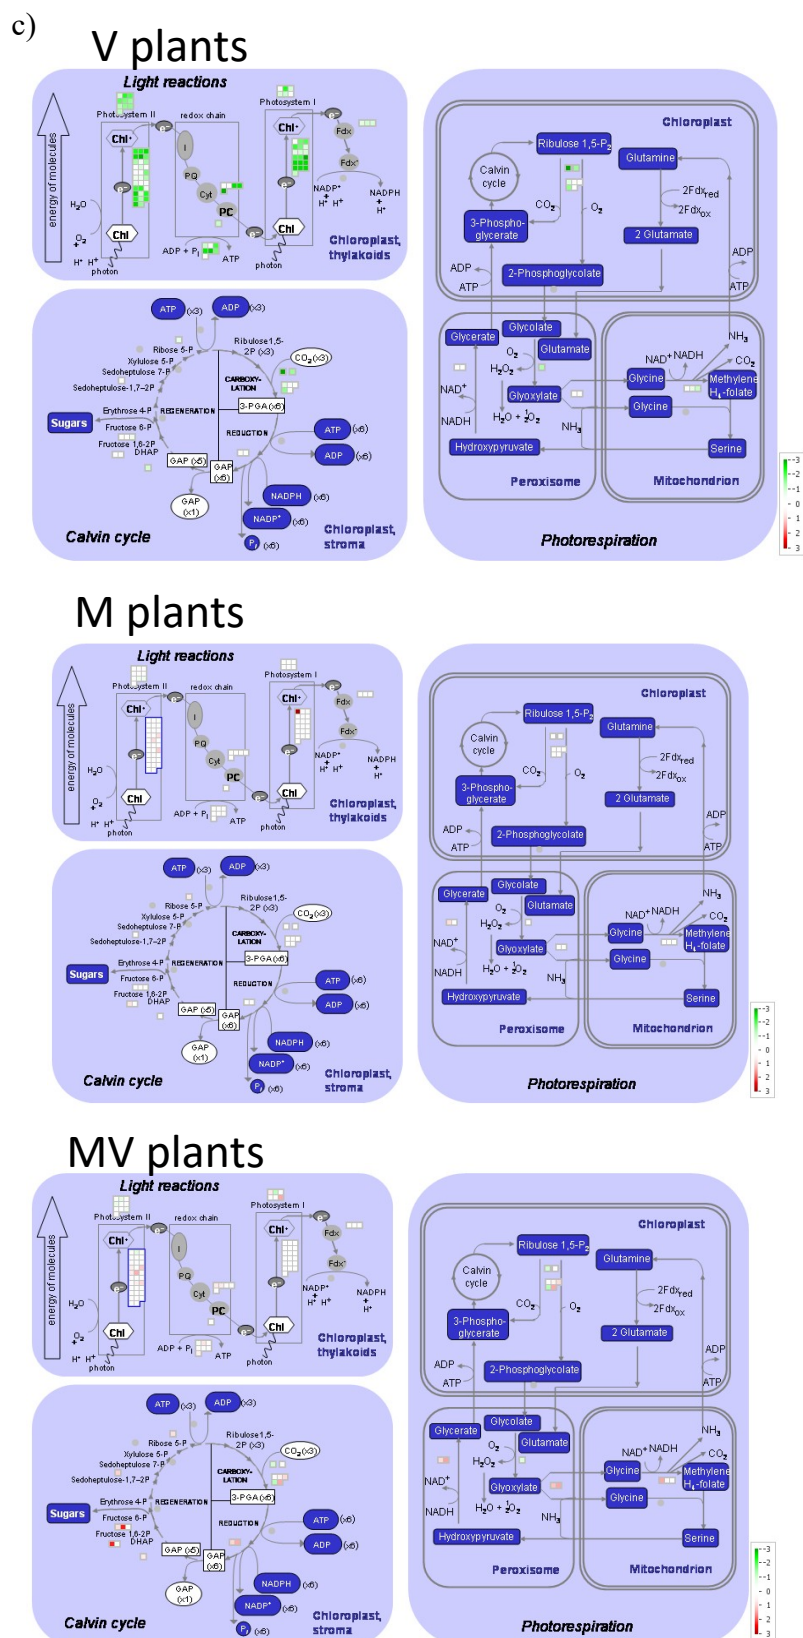

**Figure S2.** MapMan overview showing differences in transcript levels of DEGs related to (a) primary and (b) secondary metabolism and to photosynthesis (c) in virus-infected (V), mycorrhizal (M) and virus-infected mycorrhizal (MV) plants with respect to control (C) plants. Expression values are reported as the log2 of Fold Change with respect to C plants; yellow and blue colors indicate up- and down-regulation, respectively; according to the legend reported in the figure.
