# Supplementary material for: Arbuscular Mycorrhizal Symbiosis Primes Tolerance to Cucumber Mosaic Virus in Tomato
Source: Viruses. 2020 Jun 22;12(6):675. doi: 10.3390/v12060675 (PMC7354615; doi:10.3390/v12060675)
Supplement: Supplementary file 1 [file viruses-12-00675-s001.zip › TableS3.xlsx]

## Sheet: Sheet1
Table S3 - Evaluation of mycorrhization level
	F%	M%	a%	A%
MV1	95	35.21	97.98	34.5
MV2	88.75	27.59	98.01	27.04
MV3	77.5	25.85	95.82	24.77
MV4	93.75	44.08	97.72	43.07
MV5	86.25	40.24	97.74	39.33
MV6	91.25	43.11	97.35	41.97
MV7	71.25	36.8	99.32	36.55
MV8	87.5	32.59	97.18	31.67
MV9	95	48.04	97.74	46.95
MV10	90	35.22	97.47	34.33
MV11	93.75	41.88	97.56	40.85
MV12	82.5	44.63	98.5	43.96
Average	87.7083	37.9367	97.6992	37.0825
Dev.St.	7.4015	6.94178	0.82254	6.87502
Median	89.375	38.52	97.73	37.94
Asimmetry	-1.18175	-0.421657	-0.39383	-0.467924
	F%	M%	a%	A%
M1	90	38.63	99.87	38.58
M2	40	7.56	96.38	7.29	removed for low mycorrhization level
M3	95	41.8	99.36	41.53
M4	75	31.58	98.54	31.11
M5	85	37.14	96.15	35.71
M6	73.75	29.1	98.35	28.62
M7	86.25	36.38	99.75	36.28
M8	93.75	34.36	99.49	34.19
M9	88.75	35.55	98.4	34.98
M10	68.75	24.49	96.51	23.63
M11	83.75	22.41	94.09	21.09
M12	78.75	22.1	99.02	21.88
Average	79.8958	30.0917	97.9925	29.5742
Dev.St.	14.9569	9.59332	1.80399	9.64629
Median	84.375	32.97	98.47	32.65
Asimmetry	-1.85707	-1.17497	-0.999975	-1.10734
