# Supplementary material for: Arbuscular Mycorrhizal Symbiosis Primes Tolerance to Cucumber Mosaic Virus in Tomato
Source: Viruses. 2020 Jun 22;12(6):675. doi: 10.3390/v12060675 (PMC7354615; doi:10.3390/v12060675)
Supplement: Supplementary file 1 [file viruses-12-00675-s001.zip › TableS4.xlsx]

## Sheet: Foglio1
Table S4 - Biomass evaluation
	epigean (g)	hypogean (g)
C1	7.73	3.93
C2	8.04	3.2
C3	8.03	3.15
C4	7.07	2.82
C5	8.85	4.03
C6	7.24	2.35
C7	8.4	4.35
C8	8.22	3.48
C9	7.9	3.16
C10	7.46	4.27
C11	8.52	4.87
C12	5.85	3.42
M1	6.3	1.88
M2	7.41	2.15	removed for low mycorrhization level
M3	7.05	1.93
M4	9.03	2.33
M5	7.06	3.28
M6	8.93	3.4
M7	9.45	2.8
M8	5.83	2.69
M9	5.9	2.53
M10	5.36	2.97
M11	7.04	3.65
M12	7.7	4.63
MV1	6.56	2
MV2	6.18	1.47
MV3	5.8	1.49
MV4	4.7	1.5
MV5	5.78	1.28
MV6	6.4	1.56
MV7	5.8	1.84
MV8	7.74	2.45
MV9	5.89	1.44
MV10	5.6	1.91
MV11	5.73	2.31
MV12	6.07	1.71
V1	4.61	1.07
V2	7.7	2.06
V3	7.08	2.24
V4	5.55	1.6
V5	5.92	1.66
V6	6.4	1.36
V7	11.63	2.32
V8	7.76	2.26
V9	8.32	2.31
V10	5.95	1.35
V11	6.2	1.63
V12	5.23	1.02
