# Supplementary material for: Arbuscular Mycorrhizal Symbiosis Primes Tolerance to Cucumber Mosaic Virus in Tomato
Source: Viruses. 2020 Jun 22;12(6):675. doi: 10.3390/v12060675 (PMC7354615; doi:10.3390/v12060675)
Supplement: Supplementary file 1 [file viruses-12-00675-s001.zip › TableS5.xlsx]

## Sheet: raw data Fig. 4
Table S5 - Physiological measurements
SAMPLE	CO2	H2O	Temp	RH	Vpd			A	Cond	Ci	Resp
C13	401	15.9	26.4	45	1.38			3.94	0.0829	307	-0.36
C14	399	16.2	26.1	47	1.37			3.16	0.0778	318	-1.08
C15	399	16.4	25.9	48	1.3			4.16	0.0978	312	-1.04
C16	400	15.7	25.7	47	1.2			5.18	0.185	334	-0.4
C12	400	15.5	25.9	49	1.32			4.09	0.1	320	-1.4
average								4.106	0.1087	318.2	-0.856
st dev								0.720958	0.0436939	10.2078	0.456596
SE								0.322422	0.0195405	4.56508	0.204196
M13	400	16.1	26.2	47	1.38			2.63	0.0795	330	-0.685
M14	400	16.3	25.8	48	1.41			3.28	0.0654	303	-0.632
M15	400	16.5	26.1	48	1.37			3.01	0.0741	319	-0.619
M16	401	16.7	26.3	48	1.38			3.47	0.0594	290	-0.7
M11	401	16.2	25.9	47	1.38			3.1	0.072	315	-0.59
average								3.098	0.07008	311.4	-0.6452
st dev								0.315547	0.00781902	15.3721	0.0460836
SE								0.141117	0.00349677	6.87459	0.0206092
V5	401	15.5	25.9	46	1.46			3.4	0.063	297	-0.608
V4	401	15.6	25.8	46	1.62			1.56	0.0195	259	-0.979
V2	401	15.7	25.8	47	1.49			2.97	0.0426	273	-0.739
V9	401	15.8	25.9	47	1.51			3.04	0.0474	281	-0.65
V8	400	15.4	25.7	46	1.5			2.71	0.04	281	-0.9
average								2.736	0.0425	278.2	-0.7752
st dev								0.70209	0.0156486	13.8275	0.159727
SE								0.313984	0.00782432	6.91375	0.0922184
MV10	400	14.3	25.5	43	1.46			3.06	0.0879	327	-0.624
MV11	400	14.7	26	43	1.47			3.19	0.078	317	-0.734
MV5	400	15.1	25.8	45	1.52			3.2	0.0549	290	-0.259
MV8	400	15.3	25.7	46	1.45			2.92	0.0728	319	-0.3
MV7	400	15.2	25.6	46	1.45			3.06	0.069	314	-0.78
average								3.086	0.07252	313.4	-0.5394
st dev								0.114804	0.0121399	13.9392	0.244362
SE								0.051342	0.00542913	6.23378	0.109282
