# Supplementary material for: Arbuscular Mycorrhizal Symbiosis Primes Tolerance to Cucumber Mosaic Virus in Tomato
Source: Viruses. 2020 Jun 22;12(6):675. doi: 10.3390/v12060675 (PMC7354615; doi:10.3390/v12060675)
Supplement: Supplementary file 1 [file viruses-12-00675-s001.zip › TableS6.xlsx]

## Sheet: SA and JA
Table S6 - hormones measurements
Sample	mg	µL	JA_area	SA_area			Concentration factor	SA (µg/g DW)		a	b			JA		ppm	SA
Ca	95	1200	n.d.	105	0.239326	3.02307	6	0.503844		78.111	86.306			1103		100	7826.5
Cb	100	1200	n.d.	107	0.264931	3.17917	6	0.529861						559.5		50	4101.1
Cc	100	1200	n.d.	103	0.213721	2.56466	6	0.427443						287.4		25	2128.3
Cd	105	1200	n.d.	108	0.277733	3.17409	6	0.529015						170.7		10	874.3
Ma	115	1200	n.d.	97	0.136908	1.4286	6	0.2381						92.2		5	342.4
Mb	115	1200	n.d.	94	0.0985009	1.02783	6	0.171306
Mc	100	1200	n.d.	99	0.162512	1.95015	6	0.325025
Md	110	1200	n.d.	96	0.124105	1.35388	6	0.225646
Va	100	1200	n.d.	99	0.162512	1.95015	6	0.325025
Vb	90	1200	n.d.	102	0.200919	2.67892	6	0.446487
Vc	100	1200	n.d.	102	0.200919	2.41103	6	0.401838
Vd	97	1200	n.d.	103	0.213721	2.64398	6	0.440663
Mva	115	1200	n.d.	576.1	6.27049	65.4312	1	65.4312
MVb	100	1200	n.d.	491.3	5.18485	62.2182	1	62.2182
MVc	104	1200	n.d.	438.3	4.50633	51.9961	1	51.9961
MVd	100	1200	n.d.	496.7	5.25398	63.0478	1	63.0478

## Sheet: ABA and IAA
Table S6 - hormones measurements
				a	b					a
				40.077	9.4352					99.157
Samples	Weight DW	Solvent	IAA		𝜇g g-1	average	std.dev.		ABA		𝜇g g-1	average	std.dev.		ABA	100	9813.2
Ca	51	500	407.7	9.93749	97.4264	78.5035	16.3877		30.6	0.308602	3.02551	3.8061	0.763168			50	4878.1
Cb	41	500	236.3	5.66072	69.0332				37	0.373146	4.55056					25	1981
Cc	71	600	402.4	9.80524	69.051				54.1	0.545599	3.84225					10	1008.8
Va	84	700	74.4	1.621	9.64881	13.207	4.47966		151.3	1.52586	9.08252	8.2812	1.99303			5	498.6
Vb	78	700	82.8	1.8306	11.7346				93	0.937907	6.01222
Vc	69	600	110.3	2.51678	18.2375				133.4	1.34534	9.74885
MVa	72	600	107.7	2.4519	17.0271	27.1496	10.376		135.1	1.36249	9.46171	9.69972	0.369924		IAA	100	4038.8
MVb	51	500	163.8	3.85171	37.7618				96.2	0.970179	9.51155					50	1970.6
MVc	37	400	88.5	1.97282	26.6598				74.3	0.749317	10.1259					25	998.1
Ma	47	500	518.6	12.7047	135.156	225.623	119.68		90.6	0.913703	9.72024	16.1912	6.53692			10	437
Mb	5	100	169.1	3.98395	398.395				22.6	0.227921	22.7921					5	217.4
Mc	27	300	319.6	7.73922	143.319				86	0.867311	16.0613
