# Supplementary material for: Arbuscular Mycorrhizal Symbiosis Primes Tolerance to Cucumber Mosaic Virus in Tomato
Source: Viruses. 2020 Jun 22;12(6):675. doi: 10.3390/v12060675 (PMC7354615; doi:10.3390/v12060675)
Supplement: Supplementary file 1 [file viruses-12-00675-s001.zip › TableS8.xlsx]

## Sheet: Table S8
	TableS8
	List of DEGs in V, M and MV plants in respect to C plants

## Sheet: matrix
!gene_id	gene	locus	DEGs_V_vs_C	DEGs_M_vs_C	DEGs_MV_vs_C	description	GOid	Goterm	GO_branch
XLOC_002778	Solyc01g108210.2	SL2.50ch01:95569772-95574554	-1.12783	0	0	Cytochrome P450//	GO:0010295//	(+)-abscisic acid 8'-hydroxylase activity//	molecular_function//
XLOC_002659	Solyc01g105890.2	SL2.50ch01:93912518-93915326	-0.728852	1.08292	-0.530879	(E)-beta-ocimene synthase (AHRD V1 **** Q5CD81_CITUN)%3B contains Interpro domain(s) IPR005630 Terpene synthase%2C metal-binding domain //	GO:0034768//	(E)-beta-ocimene synthase activity//	molecular_function//
XLOC_015291	Solyc05g026590.1	SL2.50ch05:42101300-42104148	1.27659	0	0	Beta-ocimene synthase (AHRD V1 **** B1P189_PHALU)%3B contains Interpro domain(s) IPR001906 Terpene synthase-like //	GO:0034768//	(E)-beta-ocimene synthase activity//	molecular_function//
XLOC_002656	Solyc01g105850.2,Solyc01g105860.2	SL2.50ch01:93875385-93886419	-0.87809	0	-0.885416	(E)-beta-ocimene synthase (AHRD V1 **** Q5CD81_CITUN)%3B contains Interpro domain(s) IPR001906 Terpene synthase-like //(R)-limonene synthase (AHRD V1 ***- B9T537_RICCO)%3B contains Interpro domain(s) IPR005630 Terpene synthase%2C metal-binding domain //	GO:0034768//GO:0016829//	(E)-beta-ocimene synthase activity//lyase activity//	molecular_function//molecular_function//
XLOC_022143	Solyc07g056320.2	SL2.50ch07:64167012-64170660	1.15264	0.580181	0.762069	ER glycerol-phosphate acyltransferase (AHRD V1 **** B9T753_RICCO)%3B contains Interpro domain(s) IPR002123 Phospholipid/glycerol acyltransferase //	GO:0003841//	1-acylglycerol-3-phosphate O-acyltransferase activity//	molecular_function//
XLOC_026489	Solyc09g014350.2	SL2.50ch09:5900239-5903588	-0.724373	0	0	Glycerol-3-phosphate acyltransferase 6 (AHRD V1 **** D7LKT2_ARALY)%3B contains Interpro domain(s) IPR002123 Phospholipid/glycerol acyltransferase //	GO:0003841//	1-acylglycerol-3-phosphate O-acyltransferase activity//	molecular_function//
XLOC_026377	Solyc09g010020.2	SL2.50ch09:3447415-3449839	1.10437	0	0	1-aminocyclopropane-1-carboxylate oxidase-like protein (AHRD V1 **-* Q9LTH8_ARATH)%3B contains Interpro domain(s) IPR005123 Oxoglutarate and iron-dependent oxygenase //	GO:0009815//	1-aminocyclopropane-1-carboxylate oxidase activity//	molecular_function//
XLOC_026375	Solyc09g010000.2	SL2.50ch09:3444302-3445806	1.63669	-1.59109	0	1-aminocyclopropane-1-carboxylate oxidase-like protein (AHRD V1 **-* Q9LTH8_ARATH)%3B contains Interpro domain(s) IPR005123 Oxoglutarate and iron-dependent oxygenase //	GO:0009815//	1-aminocyclopropane-1-carboxylate oxidase activity//	molecular_function//
XLOC_011961	Solyc04g007980.2	SL2.50ch04:1636282-1640787	1.16606	-0.942989	0	1-aminocyclopropane-1-carboxylate oxidase (AHRD V1 **-* B6SUN2_MAIZE)%3B contains Interpro domain(s) IPR005123 Oxoglutarate and iron-dependent oxygenase //	GO:0009815//	1-aminocyclopropane-1-carboxylate oxidase activity//	molecular_function//
XLOC_019371	Solyc06g068270.2	SL2.50ch06:42305817-42307994	-1.7183	-0.878235	-1.71186	1-aminocyclopropane-1-carboxylate oxidase 1 (AHRD V1 **-* ACCO1_MALDO)%3B contains Interpro domain(s) IPR005123 Oxoglutarate and iron-dependent oxygenase //	GO:0009815//	1-aminocyclopropane-1-carboxylate oxidase activity//	molecular_function//
XLOC_013415	Solyc04g009860.2	SL2.50ch04:3173260-3175305	2.12758	-1.48939	0	1-aminocyclopropane-1-carboxylate oxidase-like protein (AHRD V1 **-* Q9LTH8_ARATH)%3B contains Interpro domain(s) IPR005123 Oxoglutarate and iron-dependent oxygenase //	GO:0009815//	1-aminocyclopropane-1-carboxylate oxidase activity//	molecular_function//
XLOC_025975	Solyc09g089690.2	SL2.50ch09:69445157-69447231	0	0	0.565919	1-aminocyclopropane-1-carboxylate oxidase-like protein (AHRD V1 **-* Q9LTH7_ARATH)%3B contains Interpro domain(s) IPR005123 Oxoglutarate and iron-dependent oxygenase //	GO:0009815//	1-aminocyclopropane-1-carboxylate oxidase activity//	molecular_function//
XLOC_025969	Solyc09g089580.2	SL2.50ch09:69298986-69301248	1.1805	0	0.837051	1-aminocyclopropane-1-carboxylate oxidase-like protein (AHRD V1 **-* Q9LTH8_ARATH)%3B contains Interpro domain(s) IPR005123 Oxoglutarate and iron-dependent oxygenase //	GO:0009815//	1-aminocyclopropane-1-carboxylate oxidase activity//	molecular_function//
XLOC_033823	Solyc12g006380.1	SL2.50ch12:888714-890946	2.24482	-0.761451	0.881149	1-aminocyclopropane-1-carboxylate oxidase-like protein (AHRD V1 **-* Q9LTH7_ARATH)%3B contains Interpro domain(s) IPR005123 Oxoglutarate and iron-dependent oxygenase //	GO:0009815//	1-aminocyclopropane-1-carboxylate oxidase activity//	molecular_function//
XLOC_025979	Solyc09g089740.2,Solyc09g089750.1	SL2.50ch09:69455418-69457223	0	0	3.06707	1-aminocyclopropane-1-carboxylate oxidase-like protein (AHRD V1 **-* Q9LTH8_ARATH)%3B contains Interpro domain(s) IPR005123 Oxoglutarate and iron-dependent oxygenase //1-aminocyclopropane-1-carboxylate oxidase homolog (AHRD V1 ***- ACCH3_SOLLC)//	GO:0009815//no GOid	1-aminocyclopropane-1-carboxylate oxidase activity//no GOterm//	molecular_function//no GO_branch//
XLOC_024803	Solyc08g081550.2	SL2.50ch08:64571927-64574577	1.4077	0	0	1-aminocyclopropane-1-carboxylate synthase (AHRD V1 **** Q96579_SOLLC)%3B contains Interpro domain(s) IPR004839 Aminotransferase%2C class I and II //	GO:0016847//	1-aminocyclopropane-1-carboxylate synthase activity//	molecular_function//
XLOC_024716	Solyc08g079750.2	SL2.50ch08:63235446-63239436	0	0.619825	1.39597	1-aminocyclopropane-1-carboxylate synthase (AHRD V1 **** Q6U5H3_ROSHC)%3B contains Interpro domain(s) IPR004839 Aminotransferase%2C class I and II //	GO:0016847//	1-aminocyclopropane-1-carboxylate synthase activity//	molecular_function//
XLOC_023611	Solyc08g081540.2	SL2.50ch08:64567932-64570466	2.01038	0	0	1-aminocyclopropane-1-carboxylate synthase (AHRD V1 **** Q96580_SOLLC)%3B contains Interpro domain(s) IPR004839 Aminotransferase%2C class I and II IPR004838 Aminotransferases%2C class-I%2C pyridoxal-phosphate-binding site //	GO:0016847//	1-aminocyclopropane-1-carboxylate synthase activity//	molecular_function//
XLOC_013531	Solyc04g015470.2	SL2.50ch04:5671222-5675796	-0.696216	0	0	Phosphatidylinositol-4-phosphate 5-kinase family protein (AHRD V1 **** D7L735_ARALY)%3B contains Interpro domain(s) IPR017163 Phosphatidylinositol-4-phosphate 5-kinase%2C plant //	GO:0016308//	1-phosphatidylinositol-4-phosphate 5-kinase activity//	molecular_function//
XLOC_020205	Solyc07g017510.2	SL2.50ch07:7402288-7425933	0.689448	0	0	Phosphatidylinositol-4-phosphate 5-kinase family protein (AHRD V1 **-* D7L328_ARALY)%3B contains Interpro domain(s) IPR016034 Phosphatidylinositol-4-phosphate 5-kinase%2C core%2C subgroup //	GO:0016308//	1-phosphatidylinositol-4-phosphate 5-kinase activity//	molecular_function//
XLOC_025129	Solyc09g009190.2	SL2.50ch09:2539793-2558107	0.722006	0	1.05005	1 4-alpha-glucan branching enzyme II (AHRD V1 **** P93691_WHEAT)%3B contains Interpro domain(s) IPR006589 Glycosyl hydrolase%2C family 13%2C subfamily%2C catalytic region //	GO:0003844//	1,4-alpha-glucan branching enzyme activity//	molecular_function//
XLOC_020089	Solyc07g007870.2	SL2.50ch07:2549128-2554937	0.638199	0	0	NADH flavin oxidoreductase/12-oxophytodienoate reductase (AHRD V1 **-* Q2U7C4_ASPOR)%3B contains Interpro domain(s) IPR001155 NADH:flavin oxidoreductase/NADH oxidase%2C N-terminal //	GO:0016629//	12-oxophytodienoate reductase activity//	molecular_function//
XLOC_020595	Solyc07g045080.2	SL2.50ch07:58194319-58196652	-1.23377	0	0	Alcohol dehydrogenase zinc-containing (AHRD V1 **-* B4RDK4_PHEZH)%3B contains Interpro domain(s) IPR002085 Alcohol dehydrogenase superfamily%2C zinc-containing //	GO:0032440//	2-alkenal reductase [NAD(P)] activity//	molecular_function//
XLOC_026080	Solyc09g091700.2	SL2.50ch09:70942482-70943780	-1.05457	0	-0.672891	Alcohol dehydrogenase zinc-containing (AHRD V1 **-* B4RDK4_PHEZH)%3B contains Interpro domain(s) IPR002085 Alcohol dehydrogenase superfamily%2C zinc-containing //	GO:0032440//	2-alkenal reductase [NAD(P)] activity//	molecular_function//
XLOC_022667	Solyc08g014130.2	SL2.50ch08:3834897-3844436	0.563276	0	0	2-isopropylmalate synthase 1 (AHRD V1 **** Q30DX9_9BRAS)%3B contains Interpro domain(s) IPR005671 Bacterial 2-isopropylmalate synthase //	GO:0003852//	2-isopropylmalate synthase activity//	molecular_function//
XLOC_010052	Solyc03g121720.2	SL2.50ch03:69795421-69803373	-0.507164	0	0	2-hydroxy-3-oxopropionate reductase (AHRD V1 **-* B6T4X5_MAIZE)%3B contains Interpro domain(s) IPR015815 3-hydroxyacid dehydrogenase/reductase //	GO:0003858//	3-hydroxybutyrate dehydrogenase activity//	molecular_function//
XLOC_002812	Solyc01g108800.2	SL2.50ch01:95976751-95988907	1.40219	0	0	3-hydroxyisobutyryl-CoA hydrolase (AHRD V1 **** D3NUG5_AZOS1)%3B contains Interpro domain(s) IPR001753 Crotonase%2C core //	GO:0003860//	3-hydroxyisobutyryl-CoA hydrolase activity//	molecular_function//
XLOC_012712	Solyc04g063350.2	SL2.50ch04:55440440-55469683	-0.881361	0	-0.762678	3-methyl-2-oxobutanoate dehydrogenase (2-methylpropanoyl-transferring) (AHRD V1 **** A1U0F1_MARAV)%3B contains Interpro domain(s) IPR001017 Dehydrogenase%2C E1 component //	GO:0003863//	3-methyl-2-oxobutanoate dehydrogenase (2-methylpropanoyl-transferring) activity//	molecular_function//
XLOC_033835	Solyc12g006690.1	SL2.50ch12:1152814-1155108	-1.5515	0	0	Kinase family protein (AHRD V1 **** D7LER6_ARALY)%3B contains Interpro domain(s) IPR002290 Serine/threonine protein kinase //	GO:0004676//	3-phosphoinositide-dependent protein kinase activity//	molecular_function//
XLOC_002083	Solyc01g091190.2	SL2.50ch01:84875716-84882346	-0.587914	0	0	3-phosphoshikimate 1-carboxyvinyltransferase (AHRD V1 ***- Q30CZ8_FAGSY)%3B contains Interpro domain(s) IPR001986 3-phosphoshikimate 1-carboxyvinyltransferase%2C core //	GO:0003866//	3-phosphoshikimate 1-carboxyvinyltransferase activity//	molecular_function//
XLOC_001709	Solyc01g067290.2	SL2.50ch01:75714390-75717641	0	0	0.568227	NAD-dependent epimerase/dehydratase (AHRD V1 **-- C8RY11_9RHOB)%3B contains Interpro domain(s) IPR016040 NAD(P)-binding domain //	GO:0051744//	3,8-divinyl protochlorophyllide a 8-vinyl reductase activity//	molecular_function//
XLOC_002572	Solyc01g103960.2	SL2.50ch01:92436035-92448618	-1.05855	0	0	ATP-dependent DNA helicase Q1 (AHRD V1 *-** C1GRE2_PARBA)%3B contains Interpro domain(s) IPR004589 DNA helicase%2C ATP-dependent%2C RecQ type //	GO:0043138//	3'-5' DNA helicase activity//	molecular_function//
XLOC_026418	Solyc09g010870.2	SL2.50ch09:4199565-4209973	-1.56526	0	-0.726977	Exoribonuclease R/ribonuclease II (AHRD V1 **-* A5GLA4_SYNPW)%3B contains Interpro domain(s) IPR001900 Ribonuclease II and R //	GO:0000175//	3'-5'-exoribonuclease activity//	molecular_function//
XLOC_002108	Solyc01g091840.2	SL2.50ch01:85391989-85395009	1.34925	0	0	3%26apos-phosphoadenosine 5%26apos-phosphosulfate transporter 1 (AHRD V1 **** B2BMP5_CANFA)%3B contains Interpro domain(s) IPR013657 UAA transporter //	GO:0046964//	3'-phosphoadenosine 5'-phosphosulfate transmembrane transporter activity//	molecular_function//
XLOC_011641	Solyc03g120470.2	SL2.50ch03:68850809-68860050	1.309	0	0	Aquaporin (AHRD V1 *-*- O81186_VERFO)%3B contains Interpro domain(s) IPR012269 Aquaporin //	GO:0042781//	3'-tRNA processing endoribonuclease activity//	molecular_function//
XLOC_007650	Solyc02g078860.2	SL2.50ch02:43498675-43502018	0	0	1.01321	3%26apos(2%26apos) 5%26apos-bisphosphate nucleotidase (AHRD V1 **** Q0WTT5_ARATH)%3B contains Interpro domain(s) IPR006239 3(2)%2C5 -bisphosphate nucleotidase HAL2 //	GO:0008441//	3'(2'),5'-bisphosphate nucleotidase activity//	molecular_function//
XLOC_009580	Solyc03g112060.2	SL2.50ch03:62595421-62602357	0.708543	0	0.615893	Quinolinate synthase A (AHRD V1 *-*- NADA_CYAP4)%3B contains Interpro domain(s) IPR003808 Fe-S metabolism associated SufE //	GO:0051539//	4 iron, 4 sulfur cluster binding//	molecular_function//
XLOC_032342	Solyc11g071280.1	SL2.50ch11:54809917-54813405	-1.18815	0	0	Branched-chain amino acid aminotransferase like protein (AHRD V1 **** Q0WW83_ARATH)%3B contains Interpro domain(s) IPR001544 Aminotransferase%2C class IV //	GO:0008696//	4-amino-4-deoxychorismate lyase activity//	molecular_function//
XLOC_018529	Solyc06g005980.2	SL2.50ch06:964945-972193	-1.37754	0	-0.641459	Anthranilate synthase component I-1 (AHRD V1 **** B4F8P4_MAIZE)%3B contains Interpro domain(s) IPR019999 Anthranilate synthase component I%2C C-terminal //	GO:0046820//	4-amino-4-deoxychorismate synthase activity//	molecular_function//
XLOC_011072	Solyc03g097030.2	SL2.50ch03:59381670-59386609	0.498639	0	0.662954	4-coumarate CoA ligase (AHRD V1 **** B6F2H0_IPOBA)%3B contains Interpro domain(s) IPR000873 AMP-dependent synthetase and ligase //	GO:0016207//	4-coumarate-CoA ligase activity//	molecular_function//
XLOC_034389	Solyc12g042460.1	SL2.50ch12:40124105-40129867	1.69276	0	0	4-coumarate CoA ligase (AHRD V1 **** Q0GZS1_9BORA)%3B contains Interpro domain(s) IPR000873 AMP-dependent synthetase and ligase //	GO:0016207//	4-coumarate-CoA ligase activity//	molecular_function//
XLOC_024559	Solyc08g076300.2	SL2.50ch08:60263844-60268352	-0.963773	0	0	4-coumarate-coa ligase (AHRD V1 **** B9GZT7_POPTR)%3B contains Interpro domain(s) IPR000873 AMP-dependent synthetase and ligase //	GO:0016207//	4-coumarate-CoA ligase activity//	molecular_function//
XLOC_017436	Solyc06g035960.2	SL2.50ch06:25322177-25326727	1.44863	0	0	4-coumarate-CoA ligase-like protein (AHRD V1 **** Q9SMT7_ARATH)%3B contains Interpro domain(s) IPR000873 AMP-dependent synthetase and ligase //	GO:0016207//	4-coumarate-CoA ligase activity//	molecular_function//
XLOC_031146	Solyc11g069050.1	SL2.50ch11:53626394-53633439	0.630153	0	0	4-coumarate-coa ligase (AHRD V1 **** B9N213_POPTR)%3B contains Interpro domain(s) IPR000873 AMP-dependent synthetase and ligase //	GO:0016207//	4-coumarate-CoA ligase activity//	molecular_function//
XLOC_020109	Solyc07g008360.1	SL2.50ch07:3141410-3145201	-1.252	0	0	p-coumarate CoA-ligase 2 (AHRD V1 **** D5LNB5_SORAU)%3B contains Interpro domain(s) IPR000873 AMP-dependent synthetase and ligase //	GO:0016207//	4-coumarate-CoA ligase activity//	molecular_function//
XLOC_019392	Solyc06g068650.2	SL2.50ch06:42555369-42561734	-0.567427	0.771113	0	4-coumarate CoA ligase (AHRD V1 **** Q0GZS1_9BORA)%3B contains Interpro domain(s) IPR000873 AMP-dependent synthetase and ligase //	GO:0016207//	4-coumarate-CoA ligase activity//	molecular_function//
XLOC_004456	Solyc01g098380.2	SL2.50ch01:88904806-88910487	-0.666048	0	0	Dihydrodipicolinate reductase family protein (AHRD V1 **** D7LKV2_ARALY)%3B contains Interpro domain(s) IPR011859 Dihydrodipicolinate reductase%2C plant //	GO:0008839//	4-hydroxy-tetrahydrodipicolinate reductase//	molecular_function//
XLOC_029847	Solyc10g083110.1	SL2.50ch10:62981996-62984394	-0.886972	0	-0.585358	Dihydrodipicolinate synthase 2 (AHRD V1 **** D7LCJ3_ARALY)%3B contains Interpro domain(s) IPR005263 Dihydrodipicolinate synthase subfamily //	GO:0008840//	4-hydroxy-tetrahydrodipicolinate synthase//	molecular_function//
XLOC_020593	Solyc07g045050.2	SL2.50ch07:58144013-58150304	0	0	0.969448	4-hydroxyphenylpyruvate dioxygenase (AHRD V1 **** B7X935_HEVBR)%3B contains Interpro domain(s) IPR005956 4-hydroxyphenylpyruvate dioxygenase //	GO:0003868//	4-hydroxyphenylpyruvate dioxygenase activity//	molecular_function//
XLOC_016561	Solyc05g041200.2	SL2.50ch05:50252005-50256524	0	0	0.860318	4-hydroxyphenylpyruvate dioxygenase (AHRD V1 **** B7X935_HEVBR)%3B contains Interpro domain(s) IPR005956 4-hydroxyphenylpyruvate dioxygenase //	GO:0003868//	4-hydroxyphenylpyruvate dioxygenase activity//	molecular_function//
XLOC_027195	Solyc09g082200.2	SL2.50ch09:68008047-68016748	0	0	0.537606	Folate/biopterin transporter family protein expressed (AHRD V1 **** Q10C46_ORYSJ)%3B contains Interpro domain(s) IPR004324 Biopterin transport-related protein BT1 //	GO:0015231//	5-formyltetrahydrofolate transporter activity//	molecular_function//
XLOC_027236	Solyc09g083010.2	SL2.50ch09:68700437-68704439	1.0187	0	0	Endonuclease III-like protein 1 (AHRD V1 **-- B6U0P3_MAIZE)%3B contains Interpro domain(s) IPR003265 HhH-GPD domain //	GO:0034042//	5-formyluracil DNA N-glycosylase activity//	molecular_function//
XLOC_009919	Solyc03g119070.2	SL2.50ch03:67780379-67784032	0	1.0577	0	Flap structure-specific endonuclease (AHRD V1 *--- FEN_PYRAE)%3B contains Interpro domain(s) IPR006084 DNA repair protein (XPGC)/yeast Rad //	GO:0008409//	5'-3' exonuclease activity//	molecular_function//
XLOC_004120	Solyc01g088380.1	SL2.50ch01:83143283-83162066	-1.14128	0	0	DNA helicase (AHRD V1 ***- A6ZT72_YEAS7)%3B contains Interpro domain(s) IPR014808 DNA replication factor Dna2 //	GO:0017108//	5'-flap endonuclease activity//	molecular_function//
XLOC_013107	Solyc04g080430.2	SL2.50ch04:64600321-64609855	0	0	0.644816	5%26apos-Nucleotidase (AHRD V1 **** C1FIJ4_9CHLO)%3B contains Interpro domain(s) IPR016695 Purine 5'-nucleotidase //	GO:0008253//	5'-nucleotidase activity//	molecular_function//
XLOC_009212	Solyc03g082580.2	SL2.50ch03:52501716-52506060	-0.964907	0	-0.554461	Glucosamine-6-phosphate deaminase (AHRD V1 ***- NAGB_ACHLI)%3B contains Interpro domain(s) IPR005900 6-phosphogluconolactonase //	GO:0017057//	6-phosphogluconolactonase activity//	molecular_function//
XLOC_016098	Solyc05g012110.2	SL2.50ch05:5316133-5320132	0	-0.566402	0	6-phosphogluconolactonase (AHRD V1 **** Q156I4_MANIN)%3B contains Interpro domain(s) IPR005900 6-phosphogluconolactonase //	GO:0017057//	6-phosphogluconolactonase activity//	molecular_function//
XLOC_022688	Solyc08g015660.2	SL2.50ch08:5204596-5214593	-0.745764	0	0	6 7-dimethyl-8-ribityllumazine synthase (AHRD V1 **** Q5ZQU1_TOBAC)%3B contains Interpro domain(s) IPR002180 6%2C7-dimethyl-8-ribityllumazine synthase //	GO:0000906//	6,7-dimethyl-8-ribityllumazine synthase activity//	molecular_function//
XLOC_022153	Solyc07g056570.1	SL2.50ch07:64361345-64363163	0.608091	0	0	9-cis-epoxycarotenoid dioxygenase//	GO:0045549//	9-cis-epoxycarotenoid dioxygenase activity//	molecular_function//
XLOC_004071	Solyc01g087260.2,Solyc01g087270.2	SL2.50ch01:82196995-82209975	0	0	1.05231	Carotenoid cleavage dioxygenase 1B//Carotenoid cleavage dioxygenase 2 (AHRD V1 ***- Q2PHF7_LACSA)%3B contains Interpro domain(s) IPR004294 Carotenoid oxygenase //	GO:0045549//no GOid	9-cis-epoxycarotenoid dioxygenase activity//no GOterm//	molecular_function//no GO_branch//
XLOC_020979	Solyc07g063310.2	SL2.50ch07:65805059-65807731	0.832412	0	0	LanC-like protein 2 (AHRD V1 ***- B6TCV9_MAIZE)%3B contains Interpro domain(s) IPR020464 LanC-like protein%2C eukaryotic //	GO:0010427//	abscisic acid binding//	molecular_function//
XLOC_026115	Solyc09g092490.2	SL2.50ch09:71563379-71564985	0	0.986542	2.03915	UDP-glucosyltransferase family 1 protein (AHRD V1 **** C6KI44_CITSI)%3B contains Interpro domain(s) IPR002213 UDP-glucuronosyl/UDP-glucosyltransferase //	GO:0010294//	abscisic acid glucosyltransferase activity//	molecular_function//
XLOC_010824	Solyc03g078780.1,Solyc03g078790.1	SL2.50ch03:51451019-51455685	0	1.30902	0	UDP-glucosyltransferase (AHRD V1 **** C0LNQ9_MAIZE)%3B contains Interpro domain(s) IPR002213 UDP-glucuronosyl/UDP-glucosyltransferase //UDP-glucosyltransferase family 1 protein (AHRD V1 **-- C6KI45_CITSI)%3B contains Interpro domain(s) IPR002213 UDP-glucuronosyl/UDP-glucosyltransferase //	GO:0010294//GO:0008152//	abscisic acid glucosyltransferase activity//metabolic process//	molecular_function//biological_process//
XLOC_009706	Solyc03g114460.2	SL2.50ch03:64452893-64464548	0	0	-0.58376	Acetyl-coenzyme A synthetase (AHRD V1 ***- D5HA95_SALRM)%3B contains Interpro domain(s) IPR000873 AMP-dependent synthetase and ligase //	GO:0030729//	acetoacetate-CoA ligase activity//	molecular_function//
XLOC_010484	Solyc03g044330.1	SL2.50ch03:8858834-8860814	-0.874905	0	0	Acetolactate synthase (AHRD V1 **** D7RPJ7_SOLTU)%3B contains Interpro domain(s) IPR012846 Acetolactate synthase%2C large subunit%2C biosynthetic //	GO:0003984//	acetolactate synthase activity//	molecular_function//
XLOC_015090	Solyc05g015800.2	SL2.50ch05:12077216-12079028	2.53873	1.85053	2.60255	Acetyl coenzyme A cis-3-hexen-1-ol acetyl transferase (AHRD V1 **-* Q9SRQ2_ARATH)%3B contains Interpro domain(s) IPR003480 Transferase //	GO:0010327//	acetyl CoA:(Z)-3-hexen-1-ol acetyltransferase activity//	molecular_function//
XLOC_020667	Solyc07g049660.2	SL2.50ch07:60025564-60027595	0.857809	-0.532628	0	Acetyl coenzyme A cis-3-hexen-1-ol acetyl transferase (AHRD V1 **-* Q9SRQ2_ARATH)%3B contains Interpro domain(s) IPR003480 Transferase //	GO:0010327//	acetyl CoA:(Z)-3-hexen-1-ol acetyltransferase activity//	molecular_function//
XLOC_021833	Solyc07g045350.2	SL2.50ch07:58448894-58455722	-0.560553	0	-0.872215	Acetyl-CoA C-acetyltransferase protein (AHRD V1 **** D3YN47_9ERIC)%3B contains Interpro domain(s) IPR002155 Thiolase //	GO:0003985//	acetyl-CoA C-acetyltransferase activity//	molecular_function//
XLOC_015128	Solyc05g017760.2	SL2.50ch05:18311110-18317169	0	0	-0.558734	Acetyl-CoA C-acetyltransferase (AHRD V1 **** D9U856_9LAMI)%3B contains Interpro domain(s) IPR002155 Thiolase //	GO:0003985//	acetyl-CoA C-acetyltransferase activity//	molecular_function//
XLOC_026908	Solyc09g061840.2	SL2.50ch09:60455941-60461751	1.38765	0	0	3-ketoacyl CoA thiolase 1 (AHRD V1 **** C8YNG6_PETHY)%3B contains Interpro domain(s) IPR002155 Thiolase //	GO:0003988//	acetyl-CoA C-acyltransferase activity//	molecular_function//
XLOC_019436	Solyc06g069530.2	SL2.50ch06:43296144-43298814	-0.649187	0	0	Acetyl-CoA carboxylase biotin carboxyl carrier protein (AHRD V1 *-** Q7NZD6_CHRVO)%3B contains Interpro domain(s) IPR001249 Acetyl-CoA biotin carboxyl carrier //	GO:0003989//	acetyl-CoA carboxylase activity//	molecular_function//
XLOC_024324	Solyc08g066530.2	SL2.50ch08:55255606-55266664	-0.890238	0	0	Acid phosphatase-like protein (AHRD V1 **-- Q9M0F5_ARATH)%3B contains Interpro domain(s) IPR010028 Acid phosphatase%2C plant //	GO:0003993//	acid phosphatase activity//	molecular_function//
XLOC_019177	Solyc06g062370.2	SL2.50ch06:39335959-39337196	-1.98322	0	-1.71436	Acid phosphatase (AHRD V1 **-- O49855_SOYBN)%3B contains Interpro domain(s) IPR010028 Acid phosphatase%2C plant //	GO:0003993//	acid phosphatase activity//	molecular_function//
XLOC_011673	Solyc03g121100.2	SL2.50ch03:69323078-69324282	-1.66806	0	0	Acid phosphatase (AHRD V1 **-- O49855_SOYBN)%3B contains Interpro domain(s) IPR010028 Acid phosphatase%2C plant //	GO:0003993//	acid phosphatase activity//	molecular_function//
XLOC_025921	Solyc09g082650.2	SL2.50ch09:68367207-68372159	-0.843364	0	-0.959692	Acireductone dioxygenase (AHRD V1 **** A8UGP3_SOLTU)%3B contains Interpro domain(s) IPR004313 Acireductone dioxygenase%2C ARD //	GO:0010309//	acireductone dioxygenase [iron(II)-requiring] activity//	molecular_function//
XLOC_025919	Solyc09g082630.2	SL2.50ch09:68348582-68351004	0	0	0.761567	Acireductone dioxygenase (AHRD V1 **** Q08G57_PLAMJ)%3B contains Interpro domain(s) IPR004313 Acireductone dioxygenase%2C ARD //	GO:0010309//	acireductone dioxygenase [iron(II)-requiring] activity//	molecular_function//
XLOC_013424	Solyc04g010120.2	SL2.50ch04:3406496-3416361	-0.517415	0	0	Macrophage erythroblast attacher (AHRD V1 **-- B6TF70_MAIZE)%3B contains Interpro domain(s) IPR013144 Ran binding protein-like%2C CRA domain //	GO:0003779//	actin binding//	molecular_function//
XLOC_032928	Solyc12g019480.1	SL2.50ch12:10578777-10583510	-0.624996	0	0	Formin 3 (AHRD V1 *-*- D0QAN4_ARATH)%3B contains Interpro domain(s) IPR015425 Actin-binding FH2 //	GO:0030036//	actin cytoskeleton organization//	biological_process//
XLOC_027590	Solyc10g006540.2	SL2.50ch10:1101927-1109204	0.843222	0	0	Formin 3 (AHRD V1 *-*- D0QAN4_ARATH)%3B contains Interpro domain(s) IPR015425 Actin-binding FH2 //	GO:0030036//	actin cytoskeleton organization//	biological_process//
XLOC_034343	Solyc12g044630.1	SL2.50ch12:38190601-38191245	-0.942271	0	0	Profilin (AHRD V1 ***- Q9SMC0_TOBAC)%3B contains Interpro domain(s) IPR005455 Profilin%2C plant //	GO:0030036//	actin cytoskeleton organization//	biological_process//
XLOC_032719	Solyc12g010110.1	SL2.50ch12:3235692-3246982	1.23554	0	0	Formin 2B (AHRD V1 *-*- C7BGM9_PHYPA)%3B contains Interpro domain(s) IPR015425 Actin-binding FH2 //	GO:0030036//	actin cytoskeleton organization//	biological_process//
XLOC_002408	Solyc01g099650.2	SL2.50ch01:89832504-89836006	-0.97141	0	0	Formin 3 (AHRD V1 *-*- D0QAN4_ARATH)%3B contains Interpro domain(s) IPR015425 Actin-binding FH2 //	GO:0030036//	actin cytoskeleton organization//	biological_process//
XLOC_011320	Solyc03g113710.2	SL2.50ch03:63777423-63780049	-0.837461	0	0	Formin 3 (AHRD V1 *-*- D0QAN4_ARATH)%3B contains Interpro domain(s) IPR015425 Actin-binding FH2 //	GO:0030036//	actin cytoskeleton organization//	biological_process//
XLOC_025783	Solyc09g072590.2	SL2.50ch09:65115533-65117614	1.36936	0	0	Actin-depolymerizing factor 6 (AHRD V1 **** D6BR51_9ROSI)%3B contains Interpro domain(s) IPR002108 Actin-binding%2C cofilin/tropomyosin type //	GO:0051015//	actin filament binding//	molecular_function//
XLOC_025185	Solyc09g010440.2	SL2.50ch09:3809997-3813024	0.583442	0	0	Actin-depolymerizing factor 1 (AHRD V1 **** B2CM17_SOLCH)%3B contains Interpro domain(s) IPR002108 Actin-binding%2C cofilin/tropomyosin type //	GO:0051015//	actin filament binding//	molecular_function//
XLOC_002930	Solyc01g111380.2	SL2.50ch01:97649520-97650606	0	0	-0.56694	Actin depolymerizing factor 5 (AHRD V1 **** A1XJ48_GOSHI)%3B contains Interpro domain(s) IPR002108 Actin-binding%2C cofilin/tropomyosin type //	GO:0051015//	actin filament binding//	molecular_function//
XLOC_008163	Solyc02g089610.1	SL2.50ch02:51368339-51371649	0	0	0.875755	S-adenosylmethionine decarboxylase proenzyme (AHRD V1 **** Q7XZQ9_VITVI)%3B contains Interpro domain(s) IPR001985 S-adenosylmethionine decarboxylase //	GO:0004014//	adenosylmethionine decarboxylase activity//	molecular_function//
XLOC_010347	Solyc03g031620.2	SL2.50ch03:4095982-4098899	-1.93787	-0.669479	-1.26947	Phosphoadenosine phosphosulfate reductase (AHRD V1 *-** B7I7M3_ACIB5)%3B contains Interpro domain(s) IPR004508 Thioredoxin-independent 5'-adenylylsulphate reductase //	GO:0009973//	adenylyl-sulfate reductase activity//	molecular_function//
XLOC_005426	Solyc02g032860.2	SL2.50ch02:29432758-29435213	-1.28483	0	-0.65006	Phosphoadenosine phosphosulfate reductase (AHRD V1 *-** A6EX37_9ALTE)%3B contains Interpro domain(s) IPR004508 Thioredoxin-independent 5'-adenylylsulphate reductase //	GO:0009973//	adenylyl-sulfate reductase activity//	molecular_function//
XLOC_006065	Solyc02g080640.2	SL2.50ch02:44828449-44831959	-0.964711	0	0	Phosphoadenosine phosphosulfate reductase (AHRD V1 *-** B7I7M3_ACIB5)%3B contains Interpro domain(s) IPR013766 Thioredoxin domain //	GO:0009973//	adenylyl-sulfate reductase activity//	molecular_function//
XLOC_008292	Solyc02g092410.2	SL2.50ch02:53473842-53477775	-1.48047	0	-1.02276	Adenylyl-sulfate kinase (AHRD V1 **** C6TL96_SOYBN)%3B contains Interpro domain(s) IPR002891 Adenylylsulphate kinase%2C C-terminal //	GO:0004020//	adenylylsulfate kinase activity//	molecular_function//
XLOC_004478	Solyc01g098910.2	SL2.50ch01:89275748-89279955	1.58813	0	-0.546925	Mitochondrial carrier protein (AHRD V1 ***- C5P0Z3_COCP7)%3B contains Interpro domain(s) IPR001993 Mitochondrial substrate carrier //	GO:0015217//	ADP transmembrane transporter activity//	molecular_function//
XLOC_009433	Solyc03g097170.2	SL2.50ch03:59493760-59497086	0.984982	0.584745	0	Cinnamoyl-CoA reductase-like protein (AHRD V1 ***- Q9M0B3_ARATH)%3B contains Interpro domain(s) IPR016040 NAD(P)-binding domain //	GO:0004022//	alcohol dehydrogenase (NAD) activity//	molecular_function//
XLOC_006517	Solyc02g089770.2	SL2.50ch02:51477436-51481500	1.03856	0.728926	1.26742	Dihydroflavonol-4-reductase (AHRD V1 ***- B6TK03_MAIZE)%3B contains Interpro domain(s) IPR016040 NAD(P)-binding domain //	GO:0004022//	alcohol dehydrogenase (NAD) activity//	molecular_function//
XLOC_023718	Solyc08g005120.2	SL2.50ch08:75244-78275	0	0	2.07381	Cinnamoyl-CoA reductase-like protein (AHRD V1 *-*- Q9M0B3_ARATH)%3B contains Interpro domain(s) IPR016040 NAD(P)-binding domain //	GO:0004022//	alcohol dehydrogenase (NAD) activity//	molecular_function//
XLOC_014662	Solyc05g005480.2	SL2.50ch05:352210-355615	0	0	0.748773	Oxidoreductase zinc-binding dehydrogenase (AHRD V1 **** C2RQQ3_BACCE)%3B contains Interpro domain(s) IPR002085 Alcohol dehydrogenase superfamily%2C zinc-containing //	GO:0004024//	alcohol dehydrogenase activity, zinc-dependent//	molecular_function//
XLOC_031202	Solyc11g071290.1	SL2.50ch11:54819571-54834297	0	1.67119	1.69529	Alcohol dehydrogenase (AHRD V1 **** Q43169_SOLTU)%3B contains Interpro domain(s) IPR002085 Alcohol dehydrogenase superfamily%2C zinc-containing //	GO:0004024//	alcohol dehydrogenase activity, zinc-dependent//	molecular_function//
XLOC_017014	Solyc05g056540.2	SL2.50ch05:65805846-65810833	-0.6384	0	0	Alcohol dehydrogenase-like protein (AHRD V1 **** Q8LDF7_ARATH)%3B contains Interpro domain(s) IPR002085 Alcohol dehydrogenase superfamily%2C zinc-containing //	GO:0004024//	alcohol dehydrogenase activity, zinc-dependent//	molecular_function//
XLOC_012868	Solyc04g074530.2	SL2.50ch04:60519601-60524145	1.34804	0	0	Alcohol dehydrogenase 1 (AHRD V1 **** B6TD57_MAIZE)%3B contains Interpro domain(s) IPR002085 Alcohol dehydrogenase superfamily%2C zinc-containing //	GO:0004024//	alcohol dehydrogenase activity, zinc-dependent//	molecular_function//
XLOC_017700	Solyc06g059740.2	SL2.50ch06:37606742-37608946	0	0	-1.39724	Alcohol dehydrogenase 2 (AHRD V1 **** Q84UY3_PETHY)%3B contains Interpro domain(s) IPR002085 Alcohol dehydrogenase superfamily%2C zinc-containing //	GO:0004024//	alcohol dehydrogenase activity, zinc-dependent//	molecular_function//
XLOC_008038	Solyc02g086970.2	SL2.50ch02:49533476-49550281	0.754098	0	0	Aldehyde dehydrogenase 1 (AHRD V1 **** Q84V96_LOTCO)%3B contains Interpro domain(s) IPR015590 Aldehyde dehydrogenase //	GO:0004029//	aldehyde dehydrogenase (NAD) activity//	molecular_function//
XLOC_016112	Solyc05g012330.2	SL2.50ch05:5590001-5596310	0.572757	0	0.70959	Ureide permease 2 (AHRD V1 ***- B6U6B9_MAIZE)%3B contains Interpro domain(s) IPR009834 Fatty acid elongase 3-ketoacyl-CoA synthase 1 //	GO:0005274//	allantoin uptake transmembrane transporter activity//	molecular_function//
XLOC_007631	Solyc02g078400.2	SL2.50ch02:43092001-43099367	0.878809	0	1.44591	Allantoinase (AHRD V1 **** Q6S4R9_ROBPS)%3B contains Interpro domain(s) IPR017593 Allantoinase //	GO:0004038//	allantoinase activity//	molecular_function//
XLOC_006318	Solyc02g085730.2	SL2.50ch02:48531685-48534017	0	0	-0.63587	Allene oxide cyclase (AHRD V1 **** Q9LEG5_SOLLC)%3B contains Interpro domain(s) IPR009410 Allene oxide cyclase //	GO:0046423//	allene-oxide cyclase activity//	molecular_function//
XLOC_016012	Solyc05g009470.2	SL2.50ch05:3636009-3643963	-0.732306	0	0	Alpha-glucosidase (AHRD V1 **** Q9LEC9_SOLTU)%3B contains Interpro domain(s) IPR000322 Glycoside hydrolase%2C family 31 //	GO:0004558//	alpha-1,4-glucosidase activity//	molecular_function//
XLOC_011920	Solyc04g007150.2,Solyc04g007160.1	SL2.50ch04:866254-872846	-1.38523	0	-1.00747	Alpha-glucosidase (AHRD V1 **** Q9LEC9_SOLTU)%3B contains Interpro domain(s) IPR000322 Glycoside hydrolase%2C family 31 //Alpha-glucosidase (AHRD V1 ***- Q9LEC9_SOLTU)%3B contains Interpro domain(s) IPR000322 Glycoside hydrolase%2C family 31 //	GO:0004558//GO:0005975//	alpha-1,4-glucosidase activity//carbohydrate metabolic process//	molecular_function//biological_process//
XLOC_013040	Solyc04g078930.2	SL2.50ch04:63587234-63589293	1.75308	0	0	Alpha-amylase (AHRD V1 **** Q8LP27_IPONI)%3B contains Interpro domain(s) IPR013775 Alpha-amylase%2C plant //	GO:0004556//	alpha-amylase activity//	molecular_function//
XLOC_018915	Solyc06g050130.2	SL2.50ch06:32485951-32492118	-0.715252	0	0	Alpha-galactosidase-like protein (AHRD V1 **** Q9LYL2_ARATH)%3B contains Interpro domain(s) IPR013785 Aldolase-type TIM barrel //	GO:0004557//	alpha-galactosidase activity//	molecular_function//
XLOC_013364	Solyc04g008730.2	SL2.50ch04:2393746-2398009	0	0	-1.02181	Alpha-galactosidase 1 (AHRD V1 **** Q5ZP79_PEA)%3B contains Interpro domain(s) IPR013785 Aldolase-type TIM barrel //	GO:0004557//	alpha-galactosidase activity//	molecular_function//
XLOC_009525	Solyc03g019790.2	SL2.50ch03:61371474-61377262	0.843803	0	0	Alpha-galactosidase (AHRD V1 **** Q9SP05_SOLLC)%3B contains Interpro domain(s) IPR013785 Aldolase-type TIM barrel //	GO:0004557//	alpha-galactosidase activity//	molecular_function//
XLOC_004579	Solyc01g101170.2	SL2.50ch01:91007962-91010374	-2.9448	0	-2.43435	Alpha-humulene/(-)-(E)-beta-caryophyllene synthase (AHRD V1 **** HUMS_ARATH)%3B contains Interpro domain(s) IPR005630 Terpene synthase%2C metal-binding domain //	GO:0080017//	alpha-humulene synthase activity//	molecular_function//
XLOC_017708	Solyc06g059910.2,Solyc06g059920.1,Solyc06g059930.2	SL2.50ch06:37823516-37864556	-1.21529	0	-0.752828	Alpha-humulene/(-)-(E)-beta-caryophyllene synthase (AHRD V1 **** HUMS_ARATH)%3B contains Interpro domain(s) IPR005630 Terpene synthase%2C metal-binding domain //Sesquiterpene synthase 2 (AHRD V1 ***- Q9FQ26_SOLHA)%3B contains Interpro domain(s) IPR005630 Terpene synthase%2C metal-binding domain //Sesquiterpene synthase 1 (AHRD V1 ***- Q9FQ27_SOLHA)//	GO:0080017//GO:0016829//no GOid	alpha-humulene synthase activity//lyase activity//no GOterm//	molecular_function//molecular_function//no GO_branch//
XLOC_008595	Solyc03g006980.2	SL2.50ch03:1541305-1544689	0.597259	0	0	Alpha-L-fucosidase 1 (AHRD V1 **** B6U1Y8_MAIZE)%3B contains Interpro domain(s) IPR000933 Glycoside hydrolase%2C family 29 //	GO:0004560//	alpha-L-fucosidase activity//	molecular_function//
XLOC_007862	Solyc02g083700.2	SL2.50ch02:46998752-47007113	-1.17799	0	-0.673807	Alpha-mannosidase (AHRD V1 **** Q9FKW9_ARATH)%3B contains Interpro domain(s) IPR011682 Glycosyl hydrolases 38%2C C-terminal //	GO:0004559//	alpha-mannosidase activity//	molecular_function//
XLOC_007521	Solyc02g072150.2	SL2.50ch02:41426850-41436459	0.985496	0	0	Alpha alpha-trehalose-phosphate synthase (UDP-forming) (AHRD V1 **** A3CXN9_METMJ)%3B contains Interpro domain(s) IPR001830 Glycosyl transferase%2C family 20 //	GO:0003825//	alpha,alpha-trehalose-phosphate synthase (UDP-forming) activity//	molecular_function//
XLOC_020012	Solyc07g006500.2	SL2.50ch07:1301178-1304574	0	0	-0.74781	Alpha alpha-trehalose-phosphate synthase (UDP-forming) (AHRD V1 **** D2REU5_ARCPA)%3B contains Interpro domain(s) IPR001830 Glycosyl transferase%2C family 20 //	GO:0003825//	alpha,alpha-trehalose-phosphate synthase (UDP-forming) activity//	molecular_function//
XLOC_024519	Solyc08g075550.2	SL2.50ch08:59715929-59718727	3.06753	0	0	Alternative oxidase (AHRD V1 **** Q84V46_SOLLC)%3B contains Interpro domain(s) IPR002680 Alternative oxidase //	GO:0009916//	alternative oxidase activity//	molecular_function//
XLOC_024518	Solyc08g075540.2	SL2.50ch08:59711797-59713604	1.61389	0	0.740818	Alternative oxidase (AHRD V1 **** Q84V47_SOLLC)%3B contains Interpro domain(s) IPR002680 Alternative oxidase //	GO:0009916//	alternative oxidase activity//	molecular_function//
XLOC_004975	Solyc01g110520.2	SL2.50ch01:97193930-97195979	0	0	0.690363	Glucosamine--fructose-6-phosphate aminotransferase (AHRD V1 *-*- GLMS_METKA)%3B contains Interpro domain(s) IPR005854 Amidophosphoribosyl transferase //	GO:0004044//	amidophosphoribosyltransferase activity//	molecular_function//
XLOC_013257	Solyc04g005520.2	SL2.50ch04:345226-350535	0	0	-0.683398	Aspartate/glutamate/uridylate kinase family protein (AHRD V1 **** D7KQN4_ARALY)%3B contains Interpro domain(s) IPR001048 Aspartate/glutamate/uridylate kinase //	GO:0019202//	amino acid kinase activity//	molecular_function//
XLOC_006717	Solyc02g093860.2	SL2.50ch02:54561544-54564587	1.10119	0	0.557945	Histidine amino acid transporter (AHRD V1 **** Q85V22_ORYSI)%3B contains Interpro domain(s) IPR013057 Amino acid transporter%2C transmembrane //	GO:0015171//	amino acid transmembrane transporter activity//	molecular_function//
XLOC_017558	Solyc06g050800.2	SL2.50ch06:33590883-33592778	1.95606	0	1.05033	Amino acid transporter (AHRD V1 **** B9HYI5_POPTR)%3B contains Interpro domain(s) IPR013057 Amino acid transporter%2C transmembrane //	GO:0015171//	amino acid transmembrane transporter activity//	molecular_function//
XLOC_005023	Solyc01g111980.2	SL2.50ch01:98115987-98118783	1.29913	0	0	Lysine/histidine transporter (AHRD V1 **** B9HR02_POPTR)%3B contains Interpro domain(s) IPR013057 Amino acid transporter%2C transmembrane //	GO:0015171//	amino acid transmembrane transporter activity//	molecular_function//
XLOC_013067	Solyc04g079560.2	SL2.50ch04:63983134-63988134	-0.749568	0.572328	0	Lysine/histidine transporter (AHRD V1 **** B9MVJ1_POPTR)%3B contains Interpro domain(s) IPR013057 Amino acid transporter%2C transmembrane //	GO:0015171//	amino acid transmembrane transporter activity//	molecular_function//
XLOC_021117	Solyc07g066020.2	SL2.50ch07:67557018-67561355	0.756975	-0.752331	0	Amino acid permease (AHRD V1 **** B9N5L8_POPTR)%3B contains Interpro domain(s) IPR013057 Amino acid transporter%2C transmembrane //	GO:0015171//	amino acid transmembrane transporter activity//	molecular_function//
XLOC_009136	Solyc03g078150.2	SL2.50ch03:50131085-50138379	2.00915	0	0	Amino acid transporter family protein (AHRD V1 **** D7LGK0_ARALY)%3B contains Interpro domain(s) IPR013057 Amino acid transporter%2C transmembrane //	GO:0015171//	amino acid transmembrane transporter activity//	molecular_function//
XLOC_009099	Solyc03g013440.2	SL2.50ch03:44654580-44659019	0	1.67319	1.22248	Amino acid transporter family protein (AHRD V1 **** D7LM67_ARALY)%3B contains Interpro domain(s) IPR013057 Amino acid transporter%2C transmembrane //	GO:0015171//	amino acid transmembrane transporter activity//	molecular_function//
XLOC_004991	Solyc01g111310.2	SL2.50ch01:97592413-97595955	0	0.773744	0	Transmembrane amino acid transporter protein (AHRD V1 **** A8NP23_BRUMA)%3B contains Interpro domain(s) IPR013057 Amino acid transporter%2C transmembrane //	GO:0015171//	amino acid transmembrane transporter activity//	molecular_function//
XLOC_026170	Solyc09g098380.1	SL2.50ch09:72214951-72216795	1.95696	0	0	Amino acid transporter (AHRD V1 **** B9GU98_POPTR)%3B contains Interpro domain(s) IPR013057 Amino acid transporter%2C transmembrane //	GO:0015171//	amino acid transmembrane transporter activity//	molecular_function//
XLOC_016024	Solyc05g009700.2	SL2.50ch05:3896182-3899785	1.29296	0	0	Histidine amino acid transporter (AHRD V1 **** Q85V22_ORYSI)%3B contains Interpro domain(s) IPR013057 Amino acid transporter%2C transmembrane //	GO:0015171//	amino acid transmembrane transporter activity//	molecular_function//
XLOC_023636	Solyc08g082080.2	SL2.50ch08:64977391-64983229	0.803812	0	0.89394	Amino acid transporter (AHRD V1 **** Q8GZV5_SOLLC)%3B contains Interpro domain(s) IPR013057 Amino acid transporter%2C transmembrane //	GO:0015171//	amino acid transmembrane transporter activity//	molecular_function//
XLOC_007833	Solyc02g082910.2	SL2.50ch02:46541549-46545952	1.92745	0	0	Acyl-CoA synthetase/AMP-acid ligase II (AHRD V1 **** D0C359_9GAMM)%3B contains Interpro domain(s) IPR000873 AMP-dependent synthetase and ligase //	GO:0016208//	AMP binding//	molecular_function//
XLOC_024691	Solyc08g079020.2	SL2.50ch08:62664668-62670240	-1.09562	0	0	Adenine phosphoribosyltransferase-like protein (AHRD V1 **** Q8LG17_ARATH)%3B contains Interpro domain(s) IPR005764 Adenine phosphoribosyl transferase //	GO:0016208//	AMP binding//	molecular_function//
XLOC_007046	Solyc02g037490.1	SL2.50ch02:30909487-30911146	-1.6007	0	0	Acyl-CoA synthetase/AMP-acid ligase II (AHRD V1 **** Q2W3Z0_MAGSA)%3B contains Interpro domain(s) IPR000873 AMP-dependent synthetase and ligase //	GO:0016208//	AMP binding//	molecular_function//
XLOC_018626	Solyc06g008920.2	SL2.50ch06:2849006-2853412	0	0	-0.875554	Acyl-CoA synthetase/AMP-acid ligase II (AHRD V1 **** D0C359_9GAMM)%3B contains Interpro domain(s) IPR000873 AMP-dependent synthetase and ligase //	GO:0016208//	AMP binding//	molecular_function//
XLOC_014312	Solyc04g077970.2	SL2.50ch04:62837134-62842027	-0.778443	0	-0.725101	Adenine phosphoribosyltransferase-like (AHRD V1 **** Q2V997_SOLTU)%3B contains Interpro domain(s) IPR005764 Adenine phosphoribosyl transferase //	GO:0016208//	AMP binding//	molecular_function//
XLOC_006187	Solyc02g082870.2	SL2.50ch02:46519491-46522218	-0.799593	0	0	Acyl-CoA synthetase/AMP-acid ligase II (AHRD V1 **** Q2W3Z0_MAGSA)%3B contains Interpro domain(s) IPR000873 AMP-dependent synthetase and ligase //	GO:0016208//	AMP binding//	molecular_function//
XLOC_007539	Solyc02g072540.2	SL2.50ch02:41729822-41731820	0	0.769419	2.02663	CBL-interacting protein kinase 16 (AHRD V1 **** C4P7W5_VITVI)%3B contains Interpro domain(s) IPR002290 Serine/threonine protein kinase //	GO:0004679//	AMP-activated protein kinase activity//	molecular_function//
XLOC_021170	Solyc07g005440.1	SL2.50ch07:339057-340332	0.58638	0	0	CBL-interacting protein kinase 9 (AHRD V1 **** A0MNJ6_POPTR)%3B contains Interpro domain(s) IPR002290 Serine/threonine protein kinase //	GO:0004679//	AMP-activated protein kinase activity//	molecular_function//
XLOC_018550	Solyc06g007440.2	SL2.50ch06:1453364-1455690	0	0	-1.0237	CBL-interacting protein kinase 16 (AHRD V1 **** A0MNK3_POPTR)%3B contains Interpro domain(s) IPR002290 Serine/threonine protein kinase //	GO:0004679//	AMP-activated protein kinase activity//	molecular_function//
XLOC_016802	Solyc05g052270.1	SL2.50ch05:62529166-62535956	0	0	0.684758	CBL-interacting protein kinase 13 (AHRD V1 **** C4P7W2_VITVI)%3B contains Interpro domain(s) IPR002290 Serine/threonine protein kinase //	GO:0004679//	AMP-activated protein kinase activity//	molecular_function//
XLOC_014186	Solyc04g074500.2	SL2.50ch04:60493359-60497226	0.810743	0	0	Serine-threonine protein kinase (AHRD V1 **** Q09VQ1_WHEAT)%3B contains Interpro domain(s) IPR015740 Plant protein serine/threonine kinase-like //	GO:0004679//	AMP-activated protein kinase activity//	molecular_function//
XLOC_019381	Solyc06g068450.1	SL2.50ch06:42417812-42419285	0	0	0.751515	CBL-interacting protein kinase (AHRD V1 **** A5YAI9_GOSHI)%3B contains Interpro domain(s) IPR002290 Serine/threonine protein kinase //	GO:0004679//	AMP-activated protein kinase activity//	molecular_function//
XLOC_016213	Solyc05g014370.2	SL2.50ch05:8214091-8215990	0	0.680918	0	Mitotic spindle checkpoint protein MAD2 (AHRD V1 ***- B6UEH3_MAIZE)%3B contains Interpro domain(s) IPR003511 DNA-binding HORMA //	GO:0010997//	anaphase-promoting complex binding//	molecular_function//
XLOC_009951	Solyc03g119640.2	SL2.50ch03:68196448-68200649	0.612309	0.596002	0	Aluminum-activated malate transporter-like (AHRD V1 *--- Q5Z6M4_ORYSJ)%3B contains Interpro domain(s) IPR006214 Uncharacterised protein family UPF0005 //	GO:0005253//	anion channel activity//	molecular_function//
XLOC_011060	Solyc03g096820.2	SL2.50ch03:59175496-59181656	0	0	0.596651	Aluminum-activated malate transporter-like (AHRD V1 *--- Q5Z6M4_ORYSJ)%3B contains Interpro domain(s) IPR006214 Uncharacterised protein family UPF0005 //	GO:0005253//	anion channel activity//	molecular_function//
XLOC_026972	Solyc09g065070.1	SL2.50ch09:62876663-62880314	4.23468	0	0	Aluminum-activated malate transporter-like (AHRD V1 **-* Q6EPG5_ORYSJ)%3B contains Interpro domain(s) IPR006214 Uncharacterised protein family UPF0005 //	GO:0008509//	anion transmembrane transporter activity//	molecular_function//
XLOC_022567	Solyc08g006990.1	SL2.50ch08:1562855-1567201	0.774761	0	0.861784	Aluminum-activated malate transporter (Fragment) (AHRD V1 *--* C6EP55_SECCE)%3B contains Interpro domain(s) IPR006214 Uncharacterised protein family UPF0005 //	GO:0008509//	anion transmembrane transporter activity//	molecular_function//
XLOC_025005	Solyc09g005860.2	SL2.50ch09:602116-604959	0.857353	0	0	Ankyrin repeat family protein (AHRD V1 **-* Q9LVG7_ARATH)%3B contains Interpro domain(s) IPR002110 Ankyrin //	GO:0030506//	ankyrin binding//	molecular_function//
XLOC_008362	Solyc02g093950.2	SL2.50ch02:54628433-54633022	-1.25964	0	0	Ankyrin repeat family protein (AHRD V1 **** D7M616_ARALY)%3B contains Interpro domain(s) IPR002110 Ankyrin //	GO:0030506//	ankyrin binding//	molecular_function//
XLOC_022685	Solyc08g014570.2	SL2.50ch08:4796614-4799781	1.68499	0	0	Ankyrin repeat family protein (AHRD V1 **-* Q9LVG7_ARATH)%3B contains Interpro domain(s) IPR002110 Ankyrin //	GO:0030506//	ankyrin binding//	molecular_function//
XLOC_024336	Solyc08g066770.2	SL2.50ch08:55598946-55604243	1.2784	0	0	Ankyrin repeat family protein (AHRD V1 **-* D7KKP5_ARALY)%3B contains Interpro domain(s) IPR002110 Ankyrin //	GO:0030506//	ankyrin binding//	molecular_function//
XLOC_021546	Solyc07g023990.1	SL2.50ch07:23736724-23739386	-2.03148	0	0	Ankyrin repeat domain-containing protein 27 (AHRD V1 *--* ANR27_MOUSE)%3B contains Interpro domain(s) IPR000641 CbxX/CfqX //	GO:0030506//	ankyrin binding//	molecular_function//
XLOC_033856	Solyc12g007100.1	SL2.50ch12:1537189-1541321	0.653916	0	0.673385	Ankyrin repeat domain-containing protein 1 (AHRD V1 *--* ANKR1_CHICK)%3B contains Interpro domain(s) IPR000641 CbxX/CfqX //	GO:0030506//	ankyrin binding//	molecular_function//
XLOC_033190	Solyc12g042170.1,Solyc12g042180.1	SL2.50ch12:40655900-40681004	0	0	0.764382	Arf-GAP with GTPase%2C ANK repeat and PH domain-containing protein 1 (AHRD V1 *--- AGAP1_XENLA)%3B contains Interpro domain(s) IPR001164 Arf GTPase activating protein //Arf-GAP with coiled-coil%2C ANK repeat and PH domain-containing protein 3 (AHRD V1 **-- ACAP3_HUMAN)%3B contains Interpro domain(s) IPR004148 BAR //	GO:0030506//GO:0005737//	ankyrin binding//cytoplasm//	molecular_function//cellular_component//
XLOC_026114	Solyc09g092480.1	SL2.50ch09:71561181-71562588	0.630023	0	1.53965	UDP-glucosyltransferase family 1 protein (AHRD V1 **** C6KI44_CITSI)%3B contains Interpro domain(s) IPR002213 UDP-glucuronosyl/UDP-glucosyltransferase //	GO:0080018//	anthocyanin 5-O-glucosyltransferase activity//	molecular_function//
XLOC_026116	Solyc09g092500.1	SL2.50ch09:71569319-71570732	0.889394	0.683888	1.75672	UDP-glucosyltransferase family 1 protein (AHRD V1 **** C6KI44_CITSI)%3B contains Interpro domain(s) IPR002213 UDP-glucuronosyl/UDP-glucosyltransferase //	GO:0080018//	anthocyanin 5-O-glucosyltransferase activity//	molecular_function//
XLOC_018081	Solyc06g071550.2	SL2.50ch06:44049507-44053321	-0.74102	0	-0.742298	Anthranilate phosphoribosyltransferase (AHRD V1 **** A8IBN0_CHLRE)%3B contains Interpro domain(s) IPR005940 Anthranilate phosphoribosyl transferase //	GO:0004048//	anthranilate phosphoribosyltransferase activity//	molecular_function//
XLOC_019183	Solyc06g062440.2	SL2.50ch06:39390311-39394403	0	0	0.725578	Cc-nbs-lrr%2C resistance protein//	GO:0006915//	apoptotic process//	biological_process//
XLOC_018125	Solyc06g072430.1	SL2.50ch06:44683423-44684545	0	-1.00534	0	Bcl-2-associated athanogene-like protein (AHRD V1 *-*- D1MIX4_VITVI)%3B contains Interpro domain(s) IPR003103 Apoptosis regulator Bcl-2 protein%2C BAG //	GO:0006915//	apoptotic process//	biological_process//
XLOC_032533	Solyc12g005520.1,Solyc12g005530.1,Solyc12g005540.1	SL2.50ch12:298177-301677	4.05245	0	0	Nbs%2C resistance protein fragment//Nbs%2C resistance protein fragment//BED finger-nbs-lrr resistance protein (AHRD V1 ***- B9N1L8_POPTR)//	GO:0006915//GO:0006915//no GOid	apoptotic process//apoptotic process//no GOterm//	biological_process//biological_process//no GO_branch//
XLOC_002186	Solyc01g095320.2,Solyc01g095340.2	SL2.50ch01:86628755-86633818	0.832969	0	0	BCL-2-associated athanogene 6 (AHRD V1 *-*- D7LDX9_ARALY)%3B contains Interpro domain(s) IPR003103 Apoptosis regulator Bcl-2 protein%2C BAG //Unknown Protein (AHRD V1)//	GO:0006915//no GOid	apoptotic process//no GOterm//	biological_process//no GO_branch//
XLOC_031074	Solyc11g066580.1	SL2.50ch11:52337805-52341184	0.713461	0	0	Cytochrome P450//	GO:0008392//	arachidonic acid epoxygenase activity//	molecular_function//
XLOC_018229	Solyc06g074530.1	SL2.50ch06:46112969-46114271	0	0	-0.725539	Prephenate dehydratase (AHRD V1 **** Q6JJ29_IPOTF)%3B contains Interpro domain(s) IPR001086 Prephenate dehydratase //	GO:0047769//	arogenate dehydratase activity//	molecular_function//
XLOC_031682	Solyc11g017240.1	SL2.50ch11:8039150-8042598	0.915337	0	0	Chorismate mutase 2 (AHRD V1 ***- D2CSU5_PETHY)%3B contains Interpro domain(s) IPR008238 Chorismate mutase of the AroQ class%2C eukaryotic type //	GO:0009073//	aromatic amino acid family biosynthetic process//	biological_process//
XLOC_030301	Solyc11g009080.1	SL2.50ch11:3200203-3203967	-0.961963	0	0	Phospho-2-dehydro-3-deoxyheptonate aldolase 1 (AHRD V1 ***- B6TUB8_MAIZE)%3B contains Interpro domain(s) IPR002480 DAHP synthetase%2C class II //	GO:0009073//	aromatic amino acid family biosynthetic process//	biological_process//
XLOC_022031	Solyc07g054280.1	SL2.50ch07:62627192-62628707	-1.98244	0	-1.06979	Aromatic amino acid decarboxylase (AHRD V1 **** D4NUX2_CIMRA)%3B contains Interpro domain(s) IPR010977 Aromatic-L-amino-acid decarboxylase //	GO:0004058//	aromatic-L-amino-acid decarboxylase activity//	molecular_function//
XLOC_027109	Solyc09g074570.1	SL2.50ch09:66385498-66385819	1.62215	0	0	Glutaredoxin (AHRD V1 **** B3F8F2_SOLTU)%3B contains Interpro domain(s) IPR011905 Glutaredoxin-like%2C plant II //	GO:0008794//	arsenate reductase (glutaredoxin) activity//	molecular_function//
XLOC_003903	Solyc01g079200.2	SL2.50ch01:78282909-78286020	3.19284	0	0	Gibberellin 2-oxidase (AHRD V1 **** A4GVL7_SOLLC)%3B contains Interpro domain(s) IPR005123 Oxoglutarate and iron-dependent oxygenase //	GO:0004062//	aryl sulfotransferase activity//	molecular_function//
XLOC_022114	Solyc07g055740.1	SL2.50ch07:63664743-63665799	0	-0.854948	0	Strictosidine synthase-like protein (AHRD V1 ***- A7WPL3_TOBAC)%3B contains Interpro domain(s) IPR004141 Strictosidine synthase //	GO:0004064//	arylesterase activity//	molecular_function//
XLOC_028125	Solyc10g049970.1	SL2.50ch10:47292237-47293860	-0.57291	0	0	Kynurenine formamidase (AHRD V1 **-- D7BCL0_MEISD)%3B contains Interpro domain(s) IPR007325 Putative cyclase //	GO:0004061//	arylformamidase activity//	molecular_function//
XLOC_002755	Solyc01g107700.2	SL2.50ch01:95154723-95161603	0.534238	0	0.639063	Kynurenine formamidase (AHRD V1 **-- D7BCL0_MEISD)%3B contains Interpro domain(s) IPR007325 Putative cyclase //	GO:0004061//	arylformamidase activity//	molecular_function//
XLOC_018536	Solyc06g007180.2	SL2.50ch06:1237836-1242525	1.14684	0	0	Asparagine synthase (Glutamine-hydrolyzing) (AHRD V1 **** A9EDI4_9FLAO)%3B contains Interpro domain(s) IPR006426 Asparagine synthase%2C glutamine-hydrolyzing //	GO:0004066//	asparagine synthase (glutamine-hydrolyzing) activity//	molecular_function//
XLOC_007015	Solyc02g032940.2	SL2.50ch02:29478255-29484535	-0.83814	0	0	Aspartic proteinase (AHRD V1 **-* Q8L6A8_THECC)%3B contains Interpro domain(s) IPR001461 Peptidase A1 //	GO:0004190//	aspartic-type endopeptidase activity//	molecular_function//
XLOC_004361	Solyc01g096230.2	SL2.50ch01:87319091-87320932	0.661477	0	0	ATPase AAA family protein expressed (AHRD V1 **-- Q8GZX0_ORYSJ)%3B contains Interpro domain(s) IPR003959 ATPase%2C AAA-type%2C core //	GO:0005524//	ATP binding//	molecular_function//
XLOC_011106	Solyc03g097670.2	SL2.50ch03:59989352-59999638	1.78926	0	0.777432	ATP binding protein (AHRD V1 **-- D7LS09_ARALY)%3B contains Interpro domain(s) IPR003594 ATP-binding region%2C ATPase-like //	GO:0005524//	ATP binding//	molecular_function//
XLOC_003883	Solyc01g068280.2	SL2.50ch01:77413746-77427696	-0.71187	0	0	Chromodomain-helicase-DNA-binding protein 1-like (AHRD V1 *--- CHD1L_DANRE)%3B contains Interpro domain(s) IPR000330 SNF2-related //	GO:0005524//	ATP binding//	molecular_function//
XLOC_033380	Solyc12g055810.1	SL2.50ch12:61804523-61806976	1.3055	0	0	AAA-ATPase (AHRD V1 **-- C3TX92_BRASY)%3B contains Interpro domain(s) IPR003959 ATPase%2C AAA-type%2C core //	GO:0005524//	ATP binding//	molecular_function//
XLOC_010208	Solyc03g006570.2	SL2.50ch03:1137178-1149427	0.557335	0	0	DNA repair protein RAD5 (AHRD V1 *--- A8N3A4_COPC7)%3B contains Interpro domain(s) IPR000330 SNF2-related //	GO:0005524//	ATP binding//	molecular_function//
XLOC_027016	Solyc09g065900.2	SL2.50ch09:64191794-64200438	0	0	0.621834	Glutathione reductase (AHRD V1 ***- B9IED0_POPTR)%3B contains Interpro domain(s) IPR006324 Glutathione reductase%2C plant //	GO:0005524//	ATP binding//	molecular_function//
XLOC_029161	Solyc10g038190.1	SL2.50ch10:20607160-20612976	-0.701788	0	0	Protein kinase 5 (AHRD V1 ***- Q8W4K8_ARATH)%3B contains Interpro domain(s) IPR002290 Serine/threonine protein kinase //	GO:0005524//	ATP binding//	molecular_function//
XLOC_016171	Solyc05g013670.2	SL2.50ch05:6972881-6980126	0	0	0.668287	ATP binding protein (AHRD V1 **** B6SY20_MAIZE)%3B contains Interpro domain(s) IPR003594 ATP-binding region%2C ATPase-like //	GO:0005524//	ATP binding//	molecular_function//
XLOC_010255	Solyc03g007760.2	SL2.50ch03:2280617-2288212	0.844026	0	0	Cell division protease ftsH (AHRD V1 *--- FTSH_SHIFL)%3B contains Interpro domain(s) IPR003959 ATPase%2C AAA-type%2C core //	GO:0005524//	ATP binding//	molecular_function//
XLOC_031467	Solyc11g008250.1	SL2.50ch11:2479172-2484103	0	0	1.02711	Single-stranded nucleic acid binding R3H domain protein (AHRD V1 **-- B4B323_9CHRO)%3B contains Interpro domain(s) IPR003959 ATPase%2C AAA-type%2C core //	GO:0005524//	ATP binding//	molecular_function//
XLOC_030560	Solyc11g020040.1	SL2.50ch11:10015581-10019521	0.723257	0	0	Chaperone DnaK (AHRD V1 ***- Q1SKX2_MEDTR)%3B contains Interpro domain(s) IPR012725 Chaperone DnaK //	GO:0005524//	ATP binding//	molecular_function//
XLOC_032189	Solyc11g066100.1	SL2.50ch11:51773140-51775439	0.519689	0	1.00594	heat shock protein (AHRD V1 ***- B2D2G5_CAPSN)%3B contains Interpro domain(s) IPR013126 Heat shock protein 70 //	GO:0005524//	ATP binding//	molecular_function//
XLOC_001903	Solyc01g073700.2	SL2.50ch01:81070083-81071866	-1.02081	0	0	26S protease regulatory subunit 8 homolog (AHRD V1 *--- PRS8_ENCCU)%3B contains Interpro domain(s) IPR003959 ATPase%2C AAA-type%2C core //	GO:0005524//	ATP binding//	molecular_function//
XLOC_006154	Solyc02g082290.2	SL2.50ch02:45997170-46009479	-2.48291	0	0	MORC family CW-type zinc finger 3 (AHRD V1 **-- Q4VBZ9_HUMAN)%3B contains Interpro domain(s) IPR003594 ATP-binding region%2C ATPase-like //	GO:0005524//	ATP binding//	molecular_function//
XLOC_006361	Solyc02g086710.2	SL2.50ch02:49352576-49358202	0	0	0.79823	Monodehydroascorbate reductase (NADH)-like protein (AHRD V1 **** Q0WUJ1_ARATH)%3B contains Interpro domain(s) IPR013027 FAD-dependent pyridine nucleotide-disulphide oxidoreductase //	GO:0005524//	ATP binding//	molecular_function//
XLOC_029962	Solyc10g085390.1,Solyc10g085400.1	SL2.50ch10:64588680-64603759	1.30454	0	0	D-alanine--D-alanine ligase family (AHRD V1 ***- D7L782_ARALY)%3B contains Interpro domain(s) IPR013817 Pre-ATP-grasp fold //D-alanine--D-alanine ligase family (AHRD V1 ***- D7L782_ARALY)%3B contains Interpro domain(s) IPR013817 Pre-ATP-grasp fold //	GO:0005524//GO:0005524//	ATP binding//ATP binding//	molecular_function//molecular_function//
XLOC_015804	Solyc05g005160.2	SL2.50ch05:141207-145044	0	0	-0.698901	ATP-citrate lyase A-2 (AHRD V1 **** D7KWP3_ARALY)%3B contains Interpro domain(s) IPR016102 Succinyl-CoA synthetase-like //	GO:0003878//	ATP citrate synthase activity//	molecular_function//
XLOC_002473	Solyc01g101040.2	SL2.50ch01:90899701-90904531	0	0	-0.589511	ATP-citrate lyase A-3 (AHRD V1 **** D7KJQ3_ARALY)%3B contains Interpro domain(s) IPR016102 Succinyl-CoA synthetase-like //	GO:0003878//	ATP citrate synthase activity//	molecular_function//
XLOC_011588	Solyc03g119280.2	SL2.50ch03:67910920-67919581	-0.836897	0	0	Histidyl-tRNA synthetase 1 (AHRD V1 ***- D7LWN6_ARALY)%3B contains Interpro domain(s) IPR015807 Histidyl-tRNA synthetase%2C class IIa%2C subgroup //	GO:0003879//	ATP phosphoribosyltransferase activity//	molecular_function//
XLOC_026205	Solyc09g005250.2	SL2.50ch09:183244-189258	-1.14797	0	0	Mitochondrial carrier protein (AHRD V1 ***- C6HT14_AJECH)%3B contains Interpro domain(s) IPR002113 Adenine nucleotide translocator 1 //	GO:0005347//	ATP transmembrane transporter activity//	molecular_function//
XLOC_007451	Solyc02g070780.2	SL2.50ch02:40387307-40393879	-1.20106	0	0	DNA replication licensing factor MCM3 (AHRD V1 **** Q16NY8_AEDAE)%3B contains Interpro domain(s) IPR008046 MCM protein 3 //	GO:0043140//	ATP-dependent 3'-5' DNA helicase activity//	molecular_function//
XLOC_010378	Solyc03g032070.2	SL2.50ch03:4583222-4586185	-0.57344	0	0	Holliday junction ATP-dependent DNA helicase ruvB (AHRD V1 **** D0N0A1_PHYIN)%3B contains Interpro domain(s) IPR010339 TIP49%2C C-terminal //	GO:0043140//	ATP-dependent 3'-5' DNA helicase activity//	molecular_function//
XLOC_001802	Solyc01g079500.2	SL2.50ch01:78548930-78555020	-1.16038	0	0	DNA replication licensing factor (AHRD V1 **** Q2U020_ASPOR)%3B contains Interpro domain(s) IPR008050 MCM protein 7 //	GO:0043140//	ATP-dependent 3'-5' DNA helicase activity//	molecular_function//
XLOC_011091	Solyc03g097370.2	SL2.50ch03:59682741-59690058	0.749188	0	1.3551	DNA helicase-like (AHRD V1 **** Q9FGC2_ARATH)%3B contains Interpro domain(s) IPR003593 ATPase%2C AAA+ type%2C core //	GO:0043141//	ATP-dependent 5'-3' DNA helicase activity//	molecular_function//
XLOC_009722	Solyc03g114780.2	SL2.50ch03:64667304-64681743	0.628239	0	0.777133	Predicted ATP-dependent RNA helicase (AHRD V1 **** Q2U083_ASPOR)%3B contains Interpro domain(s) IPR011545 DNA/RNA helicase%2C DEAD/DEAH box type%2C N-terminal //	GO:0004003//	ATP-dependent DNA helicase activity//	molecular_function//
XLOC_007959	Solyc02g085390.2	SL2.50ch02:48310580-48318523	-1.1951	0	0	Uncharacterized ATP-dependent helicase C25A8.01c (AHRD V1 **-* YFC1_SCHPO)%3B contains Interpro domain(s) IPR000330 SNF2-related //	GO:0004003//	ATP-dependent DNA helicase activity//	molecular_function//
XLOC_007139	Solyc02g062780.2	SL2.50ch02:34555588-34566354	-0.830754	0	0	Chromodomain-helicase-DNA-binding protein 6 (AHRD V1 **-* CHD6_HUMAN)%3B contains Interpro domain(s) IPR000330 SNF2-related //	GO:0004003//	ATP-dependent DNA helicase activity//	molecular_function//
XLOC_034657	Solyc12g056740.1	SL2.50ch12:62817170-62823484	-0.582317	0	0	ATP-dependent RNA helicase (AHRD V1 ***- D3BPQ9_POLPA)%3B contains Interpro domain(s) IPR011545 DNA/RNA helicase%2C DEAD/DEAH box type%2C N-terminal //	GO:0008026//	ATP-dependent helicase activity//	molecular_function//
XLOC_033819	Solyc12g006320.1	SL2.50ch12:840990-847762	-0.654037	0	0	ATP-dependent RNA helicase (AHRD V1 *-*- Q6L724_HORVU)%3B contains Interpro domain(s) IPR011545 DNA/RNA helicase%2C DEAD/DEAH box type%2C N-terminal //	GO:0008026//	ATP-dependent helicase activity//	molecular_function//
XLOC_003930	Solyc01g079800.2	SL2.50ch01:78927573-78933376	0.774352	0	1.06318	ATP-dependent RNA helicase (AHRD V1 ***- A0YWB9_LYNSP)%3B contains Interpro domain(s) IPR011545 DNA/RNA helicase%2C DEAD/DEAH box type%2C N-terminal //	GO:0008026//	ATP-dependent helicase activity//	molecular_function//
XLOC_021018	Solyc07g064030.2	SL2.50ch07:66329364-66334835	-0.848507	0	0	Kinesin-like protein (AHRD V1 ***- Q9M0X6_ARATH)%3B contains Interpro domain(s) IPR001752 Kinesin%2C motor region //	GO:0008569//	ATP-dependent microtubule motor activity, minus-end-directed//	molecular_function//
XLOC_022320	Solyc07g065210.2	SL2.50ch07:67065671-67071844	-1.59931	0.549356	0	Kinesin motor family protein (AHRD V1 *-** D7LAW5_ARALY)%3B contains Interpro domain(s) IPR010544 Kinesin-related //	GO:0008574//	ATP-dependent microtubule motor activity, plus-end-directed//	molecular_function//
XLOC_026136	Solyc09g097860.2	SL2.50ch09:71847213-71855973	-0.838039	0.644944	0	Kinesin-like protein (AHRD V1 ***- Q9LUG0_ARATH)%3B contains Interpro domain(s) IPR010544 Kinesin-related //	GO:0008574//	ATP-dependent microtubule motor activity, plus-end-directed//	molecular_function//
XLOC_029860	Solyc10g083310.1	SL2.50ch10:63144229-63152647	-1.22068	0	0	Kinesin-5 (AHRD V1 *-*- D2V727_NAEGR)%3B contains Interpro domain(s) IPR001752 Kinesin%2C motor region //	GO:0008574//	ATP-dependent microtubule motor activity, plus-end-directed//	molecular_function//
XLOC_025166	Solyc09g010060.2	SL2.50ch09:3460352-3468455	-1.13767	0.63045	0	Kinesin (AHRD V1 ***- Q86ZA8_COCHE)%3B contains Interpro domain(s) IPR001752 Kinesin%2C motor region //	GO:0008574//	ATP-dependent microtubule motor activity, plus-end-directed//	molecular_function//
XLOC_024618	Solyc08g077440.2	SL2.50ch08:61326612-61336566	0	0	0.841871	ATP-dependent protease La (AHRD V1 **** A7HC55_ANADF)%3B contains Interpro domain(s) IPR004815 Peptidase S16%2C ATP-dependent protease La //	GO:0004176//	ATP-dependent peptidase activity//	molecular_function//
XLOC_005987	Solyc02g079000.2	SL2.50ch02:43609237-43625005	-0.754888	0	0	Cell division protease ftsH homolog 4 (AHRD V1 *-*- FTSH4_SYNY3)%3B contains Interpro domain(s) IPR003959 ATPase%2C AAA-type%2C core //	GO:0004176//	ATP-dependent peptidase activity//	molecular_function//
XLOC_022087	Solyc07g055320.2	SL2.50ch07:63393507-63397784	0	0	0.903072	ATP-dependent Zn protease cell division protein FtsH homolog (AHRD V1 **** B2XTF7_HETA2)%3B contains Interpro domain(s) IPR005936 Peptidase M41%2C FtsH //	GO:0004176//	ATP-dependent peptidase activity//	molecular_function//
XLOC_008613	Solyc03g007330.2	SL2.50ch03:1890889-1902614	0	0	1.01478	Cell division protease ftsH homolog (AHRD V1 *-*- FTSH_RICTY)%3B contains Interpro domain(s) IPR005936 Peptidase M41%2C FtsH //	GO:0004176//	ATP-dependent peptidase activity//	molecular_function//
XLOC_006114	Solyc02g081550.2	SL2.50ch02:45464010-45466700	0	0	1.74875	ATP-dependent Zn protease cell division protein FtsH homolog (AHRD V1 **** B2XTF7_HETA2)%3B contains Interpro domain(s) IPR001315 Caspase Recruitment IPR003960 ATPase%2C AAA-type%2C conserved site IPR005936 Peptidase M41%2C FtsH IPR006025 Peptidase M%2C neutral zinc metallopeptidases%2C zinc-binding site //	GO:0004176//	ATP-dependent peptidase activity//	molecular_function//
XLOC_002218	Solyc01g095990.2	SL2.50ch01:87101742-87105000	0.665781	0	0	Phosphatidylinositol kinase family-like protein (Fragment) (AHRD V1 *--- C3SA88_BRADI)%3B contains Interpro domain(s) IPR000403 Phosphatidylinositol 3- and 4-kinase%2C catalytic //	GO:0043008//	ATP-dependent protein binding//	molecular_function//
XLOC_009165	Solyc03g078630.2	SL2.50ch03:51249584-51250873	1.21076	0	0	Ubiquitin (AHRD V1 ***- Q00IB5_RANNI)%3B contains Interpro domain(s) IPR019956 Ubiquitin subgroup //	GO:0043008//	ATP-dependent protein binding//	molecular_function//
XLOC_023567	Solyc08g080550.1	SL2.50ch08:63824273-63828387	0	0	0.613477	ATP-dependent RNA helicase DeaD (AHRD V1 **** C5ZVH9_9HELI)%3B contains Interpro domain(s) IPR011545 DNA/RNA helicase%2C DEAD/DEAH box type%2C N-terminal //	GO:0004004//	ATP-dependent RNA helicase activity//	molecular_function//
XLOC_004063	Solyc01g087070.2	SL2.50ch01:82011333-82014258	1.98317	0	0	Mitochondrial ADP/ATP carrier proteins (AHRD V1 **** Q2UU95_ASPOR)%3B contains Interpro domain(s) IPR002113 Adenine nucleotide translocator 1 //	GO:0005471//	ATP:ADP antiporter activity//	molecular_function//
XLOC_009737	Solyc03g115120.1	SL2.50ch03:64922884-64924003	-1.3792	0	-0.749853	Chaperone protein dnaJ (AHRD V1 ***- A8BQ93_GIALA)%3B contains Interpro domain(s) IPR015609 Molecular chaperone%2C heat shock protein%2C Hsp40%2C DnaJ //	GO:0001671//	ATPase activator activity//	molecular_function//
XLOC_026076	Solyc09g091660.2	SL2.50ch09:70907292-70915784	1.28541	-0.913011	0	ABC transporter G family member 40 (AHRD V1 ***- AB40G_ARATH)%3B contains Interpro domain(s) IPR013525 ABC-2 type transporter //	GO:0042626//	ATPase activity, coupled to transmembrane movement of substances//	molecular_function//
XLOC_019291	Solyc06g065670.2	SL2.50ch06:41068248-41078260	0	0	0.531657	ATP-binding cassette transporter (AHRD V1 **** D8RL93_SELML)%3B contains Interpro domain(s) IPR013525 ABC-2 type transporter //	GO:0042626//	ATPase activity, coupled to transmembrane movement of substances//	molecular_function//
XLOC_013922	Solyc04g051800.2	SL2.50ch04:51099463-51104758	0	0	1.16725	ABC transporter ATP-binding protein (AHRD V1 ***- D4ZPJ5_SPIPL)%3B contains Interpro domain(s) IPR003439 ABC transporter-like //	GO:0042626//	ATPase activity, coupled to transmembrane movement of substances//	molecular_function//
XLOC_016868	Solyc05g053600.2	SL2.50ch05:63668523-63675423	1.48143	0	0	ATP-binding cassette transporter (AHRD V1 ***- D8RL93_SELML)%3B contains Interpro domain(s) IPR013525 ABC-2 type transporter //	GO:0042626//	ATPase activity, coupled to transmembrane movement of substances//	molecular_function//
XLOC_018258	Solyc06g074940.2	SL2.50ch06:46443302-46447188	0.910258	0	0.978707	ATP-binding cassette protein (AHRD V1 ***- Q5A2T2_CANAL)%3B contains Interpro domain(s) IPR003439 ABC transporter-like //	GO:0042626//	ATPase activity, coupled to transmembrane movement of substances//	molecular_function//
XLOC_015739	Solyc05g055330.2	SL2.50ch05:65008289-65016438	0	-0.708454	-0.683261	ATP-binding cassette transporter (AHRD V1 ***- D8RL77_SELML)%3B contains Interpro domain(s) IPR013525 ABC-2 type transporter //	GO:0042626//	ATPase activity, coupled to transmembrane movement of substances//	molecular_function//
XLOC_011287	Solyc03g113040.2	SL2.50ch03:63336011-63344282	1.21552	0	0	ATP-binding cassette (ABC) transporter 17 (AHRD V1 ***- Q4H493_RAT)%3B contains Interpro domain(s) IPR003439 ABC transporter-like //	GO:0042626//	ATPase activity, coupled to transmembrane movement of substances//	molecular_function//
XLOC_004576	Solyc01g101070.2	SL2.50ch01:90921429-90931210	0	0	0.545945	ABC transporter G family member 37 (AHRD V1 ***- AB37G_ARATH)%3B contains Interpro domain(s) IPR013525 ABC-2 type transporter //	GO:0042626//	ATPase activity, coupled to transmembrane movement of substances//	molecular_function//
XLOC_009634	Solyc03g113070.2,Solyc03g113080.2	SL2.50ch03:63366684-63374060	1.47367	0	0	ATP-binding cassette (ABC) transporter 17 (AHRD V1 *-*- Q4H493_RAT)//ATP-binding cassette transporter (AHRD V1 ***- D8RFW2_SELML)%3B contains Interpro domain(s) IPR003439 ABC transporter-like //	GO:0042626//GO:0016887//	ATPase activity, coupled to transmembrane movement of substances//ATPase activity//	molecular_function//molecular_function//
XLOC_010885	Solyc03g082920.2	SL2.50ch03:52794868-52798951	0	0	-0.742987	Heat shock protein (AHRD V1 ***- Q84KP8_CYAME)%3B contains Interpro domain(s) IPR013126 Heat shock protein 70 //	GO:0042623//	ATPase activity, coupled//	molecular_function//
XLOC_010264	Solyc03g007890.2	SL2.50ch03:2410870-2414110	0	0	1.52039	Heat shock protein 90 (Fragment) (AHRD V1 **-- Q2L3T8_WHEAT)%3B contains Interpro domain(s) IPR003594 ATP-binding region%2C ATPase-like IPR001404 Heat shock protein Hsp90 //	GO:0042623//	ATPase activity, coupled//	molecular_function//
XLOC_023678	Solyc08g082820.2	SL2.50ch08:65489310-65493585	0	0	-0.707821	Heat shock protein (AHRD V1 ***- Q84KP8_CYAME)%3B contains Interpro domain(s) IPR013126 Heat shock protein 70 //	GO:0042623//	ATPase activity, coupled//	molecular_function//
XLOC_019635	Solyc06g075010.2	SL2.50ch06:46536131-46542431	-1.59387	0	-1.29303	chaperonin (AHRD V1 ***- B2IXD2_NOSP7)%3B contains Interpro domain(s) IPR001844 Chaperonin Cpn60 //	GO:0042623//	ATPase activity, coupled//	molecular_function//
XLOC_007127	Solyc02g062550.2	SL2.50ch02:34275289-34277458	2.82811	0	0	Cell division protease ftsH homolog (AHRD V1 *--- FTSH_HELPY)%3B contains Interpro domain(s) IPR003959 ATPase%2C AAA-type%2C core //	GO:0042623//	ATPase activity, coupled//	molecular_function//
XLOC_010414	Solyc03g033840.2	SL2.50ch03:5443529-5446657	1.92431	0	0.720845	26S protease regulatory subunit 6B homolog (AHRD V1 *--- PRS6B_ASPNG)%3B contains Interpro domain(s) IPR003959 ATPase%2C AAA-type%2C core //	GO:0042623//	ATPase activity, coupled//	molecular_function//
XLOC_017455	Solyc06g036290.2	SL2.50ch06:25803160-25806560	0.630376	0	1.35322	Heat shock protein 90 (Fragment) (AHRD V1 **-- Q00NU9_WHEAT)%3B contains Interpro domain(s) IPR003594 ATP-binding region%2C ATPase-like IPR001404 Heat shock protein Hsp90 //	GO:0042623//	ATPase activity, coupled//	molecular_function//
XLOC_006404	Solyc02g087530.1	SL2.50ch02:49937470-49938790	2.29241	0	0	AAA-ATPase (AHRD V1 **-* C3TX92_BRASY)%3B contains Interpro domain(s) IPR003959 ATPase%2C AAA-type%2C core //	GO:0042623//	ATPase activity, coupled//	molecular_function//
XLOC_007925	Solyc02g084900.2	SL2.50ch02:47956672-47958629	1.97804	0	-1.10908	Cell division protease ftsH homolog (AHRD V1 *--- FTSH_BACPE)%3B contains Interpro domain(s) IPR003959 ATPase%2C AAA-type%2C core //	GO:0016887//	ATPase activity//	molecular_function//
XLOC_008767	Solyc03g033790.2	SL2.50ch03:5404284-5408280	1.95813	0	0	Cell division protease ftsH homolog 3 (AHRD V1 *--- FTSH3_SYNY3)%3B contains Interpro domain(s) IPR003959 ATPase%2C AAA-type%2C core //	GO:0016887//	ATPase activity//	molecular_function//
XLOC_007796	Solyc02g081980.2	SL2.50ch02:45730460-45734471	-1.43448	0	-1.13266	Ectonucleoside triphosphate diphosphohydrolase 6 (AHRD V1 **-- Q6YHK4_CAVPO)%3B contains Interpro domain(s) IPR000407 Nucleoside phosphatase GDA1/CD39 //	GO:0016887//	ATPase activity//	molecular_function//
XLOC_014757	Solyc05g007470.2	SL2.50ch05:2038020-2040218	0.601926	-0.793192	0.763499	AAA-ATPase (AHRD V1 **-* C3TX92_BRASY)%3B contains Interpro domain(s) IPR003959 ATPase%2C AAA-type%2C core //	GO:0016887//	ATPase activity//	molecular_function//
XLOC_028871	Solyc10g007280.2	SL2.50ch10:1683211-1684934	2.86104	0	0	AAA-ATPase (AHRD V1 **-* C3TX92_BRASY)%3B contains Interpro domain(s) IPR003959 ATPase%2C AAA-type%2C core //	GO:0016887//	ATPase activity//	molecular_function//
XLOC_008065	Solyc02g087540.1	SL2.50ch02:49939351-49940911	3.60274	2.11165	0	Cell division AAA ATPase family protein (AHRD V1 **-* B6Z265_WHEAT)%3B contains Interpro domain(s) IPR003959 ATPase%2C AAA-type%2C core //	GO:0016887//	ATPase activity//	molecular_function//
XLOC_027695	Solyc10g008740.2	SL2.50ch10:2822973-2826287	-0.723876	0	0	Magnesium chelatase ATPase subunit I (AHRD V1 **** Q53RM0_ORYSJ)%3B contains Interpro domain(s) IPR011775 Magnesium chelatase%2C ATPase subunit I //	GO:0016887//	ATPase activity//	molecular_function//
XLOC_005433	Solyc02g032960.2,Solyc02g032970.2	SL2.50ch02:29532608-29576060	0	0.694682	0	Cell division protease FtsH homolog (AHRD V1 *--- C5NVJ0_9BACL)%3B contains Interpro domain(s) IPR003959 ATPase%2C AAA-type%2C core //Cell division protease FtsH (AHRD V1 ***- D8HK14_AMYMU)%3B contains Interpro domain(s) IPR000642 Peptidase M41 //	GO:0016887//GO:0006508//	ATPase activity//proteolysis//	molecular_function//biological_process//
XLOC_013312	Solyc04g007690.2	SL2.50ch04:1373822-1377286	0	0.564485	0.537997	Auxin efflux carrier (AHRD V1 **** D6RT11_SOLLC)%3B contains Interpro domain(s) IPR014024 Auxin efflux carrier%2C subgroup //	GO:0010329//	auxin efflux transmembrane transporter activity//	molecular_function//
XLOC_024582	Solyc08g076720.2	SL2.50ch08:60661072-60670786	-0.778357	0	0	Uncharacterized ABC transporter ATP-binding protein TM_0288 (AHRD V1 *--* Y288_THEMA)%3B contains Interpro domain(s) IPR003439 ABC transporter-like //	GO:0010329//	auxin efflux transmembrane transporter activity//	molecular_function//
XLOC_008057	Solyc02g087410.2	SL2.50ch02:49854339-49860627	1.9993	0	0	Lipid A export ATP-binding/permease protein msbA (AHRD V1 *--- MSBA_CHRVO)%3B contains Interpro domain(s) IPR003439 ABC transporter-like //	GO:0010329//	auxin efflux transmembrane transporter activity//	molecular_function//
XLOC_008079	Solyc02g087870.2	SL2.50ch02:50137413-50145188	-0.652997	0	0	Uncharacterized ABC transporter ATP-binding protein/permease C9B6.09c (AHRD V1 *--* YNT9_SCHPO)%3B contains Interpro domain(s) IPR001140 ABC transporter%2C transmembrane region //	GO:0010329//	auxin efflux transmembrane transporter activity//	molecular_function//
XLOC_019093	Solyc06g059730.1	SL2.50ch06:37586004-37591432	1.45813	0	0	Auxin efflux carrier (AHRD V1 **** Q71T12_MOMCH)%3B contains Interpro domain(s) IPR014024 Auxin efflux carrier%2C subgroup //	GO:0010329//	auxin efflux transmembrane transporter activity//	molecular_function//
XLOC_018646	Solyc06g009290.2	SL2.50ch06:3249410-3257702	1.34751	0	0	Lipid A export ATP-binding/permease protein msbA (AHRD V1 *--- MSBA_SYNAS)%3B contains Interpro domain(s) IPR003439 ABC transporter-like //	GO:0010329//	auxin efflux transmembrane transporter activity//	molecular_function//
XLOC_033555	Solyc12g095750.1	SL2.50ch12:64884717-64889971	0	0	1.2853	Auxin efflux carrier family protein (AHRD V1 **** D7KJ74_ARALY)%3B contains Interpro domain(s) IPR004776 Auxin efflux carrier //	GO:0009672//	auxin:proton symporter activity//	molecular_function//
XLOC_007050	Solyc02g037550.2	SL2.50ch02:31094730-31098788	1.00239	0	0.979044	Auxin efflux carrier family protein (AHRD V1 **** D7KJ74_ARALY)%3B contains Interpro domain(s) IPR004776 Auxin efflux carrier //	GO:0009672//	auxin:proton symporter activity//	molecular_function//
XLOC_010373	Solyc03g031990.2	SL2.50ch03:4479038-4483950	1.86385	0	1.6998	Auxin efflux carrier family protein (AHRD V1 **** D7KJ74_ARALY)%3B contains Interpro domain(s) IPR004776 Auxin efflux carrier //	GO:0009672//	auxin:proton symporter activity//	molecular_function//
XLOC_013221	Solyc04g082830.2	SL2.50ch04:66364778-66369267	2.71252	0	0	Auxin efflux carrier family protein (AHRD V1 **** D7KJ74_ARALY)%3B contains Interpro domain(s) IPR004776 Auxin efflux carrier //	GO:0009672//	auxin:proton symporter activity//	molecular_function//
XLOC_014399	Solyc04g079990.2	SL2.50ch04:64293372-64297493	-1.31449	0	0	DNA-3-methyladenine glycosylase I (AHRD V1 ***- B6U9I4_MAIZE)%3B contains Interpro domain(s) IPR005019 Methyladenine glycosylase //	GO:0006284//	base-excision repair//	biological_process//
XLOC_006144	Solyc02g082120.2	SL2.50ch02:45841824-45844588	-0.584609	0	0	DNA-3-methyladenine glycosylase I (AHRD V1 ***- B6TPB7_MAIZE)%3B contains Interpro domain(s) IPR005019 Methyladenine glycosylase //	GO:0006284//	base-excision repair//	biological_process//
XLOC_020566	Solyc07g043660.2	SL2.50ch07:57629212-57631265	-1.59484	0	0	Acyl-CoA synthetase/AMP-acid ligase II (AHRD V1 **** D0C359_9GAMM)%3B contains Interpro domain(s) IPR000873 AMP-dependent synthetase and ligase //	GO:0018858//	benzoate-CoA ligase activity//	molecular_function//
XLOC_010369	Solyc03g031940.2	SL2.50ch03:4405149-4408485	-1.70269	0	-0.863981	Acyl-CoA synthetase/AMP-acid ligase II (AHRD V1 **** D0C359_9GAMM)%3B contains Interpro domain(s) IPR000873 AMP-dependent synthetase and ligase //	GO:0018858//	benzoate-CoA ligase activity//	molecular_function//
XLOC_008725	Solyc03g031870.1	SL2.50ch03:4335308-4337609	1.75394	0	0	Acyl-CoA synthetase/AMP-acid ligase (AHRD V1 **** A4SMQ8_AERS4)%3B contains Interpro domain(s) IPR000873 AMP-dependent synthetase and ligase //	GO:0018858//	benzoate-CoA ligase activity//	molecular_function//
XLOC_023247	Solyc08g069060.2	SL2.50ch08:58144947-58149868	1.22588	0	0	Beta-1 3-galactosyltransferase 6 (AHRD V1 **** B6UBH3_MAIZE)%3B contains Interpro domain(s) IPR002659 Glycosyl transferase%2C family 31 //	GO:0048531//	beta-1,3-galactosyltransferase activity//	molecular_function//
XLOC_022575	Solyc08g007130.2	SL2.50ch08:1700682-1704242	0.736066	1.31172	1.77233	Beta-amylase 8 (AHRD V1 **** D7MC27_ARALY)%3B contains Interpro domain(s) IPR001554 Glycoside hydrolase%2C family 14 //	GO:0016161//	beta-amylase activity//	molecular_function//
XLOC_001727	Solyc01g067660.2	SL2.50ch01:76553512-76556684	0	0	1.44309	Beta-amylase (AHRD V1 **** Q5F304_SOYBN)%3B contains Interpro domain(s) IPR013781 Glycoside hydrolase%2C subgroup%2C catalytic core //	GO:0016161//	beta-amylase activity//	molecular_function//
XLOC_023404	Solyc08g077530.2	SL2.50ch08:61518170-61521955	0.889538	0.771938	0.945047	Beta-amylase (AHRD V1 **** Q5F305_SOYBN)%3B contains Interpro domain(s) IPR001371 Glycoside hydrolase%2C family 14B%2C plant //	GO:0016161//	beta-amylase activity//	molecular_function//
XLOC_020718	Solyc07g052690.2	SL2.50ch07:61143597-61147954	1.05685	0	1.26373	Beta-amylase (AHRD V1 **** Q9AT14_CASCR)%3B contains Interpro domain(s) IPR013781 Glycoside hydrolase%2C subgroup%2C catalytic core //	GO:0016161//	beta-amylase activity//	molecular_function//
XLOC_026040	Solyc09g091030.2,Solyc09g091040.2	SL2.50ch09:70382320-70387969	0	0	1.60453	Beta-amylase (AHRD V1 **** E0AE02_SOLLC)%3B contains Interpro domain(s) IPR013781 Glycoside hydrolase%2C subgroup%2C catalytic core //Late embryogenesis-abundant protein (AHRD V1 ***- Q5Q032_CHOBU)//	GO:0016161//no GOid	beta-amylase activity//no GOterm//	molecular_function//no GO_branch//
XLOC_021773	Solyc07g042630.2	SL2.50ch07:56098331-56108664	1.49161	0	2.1051	Beta-Amyrin Synthase (AHRD V1 **** O82146_PANGI)%3B contains Interpro domain(s) IPR018333 Squalene cyclase //	GO:0042300//	beta-amyrin synthase activity//	molecular_function//
XLOC_024329	Solyc08g066650.2	SL2.50ch08:55411044-55414119	inf	0	0	Carotenoid cleavage dioxygenase 8//	GO:0003834//	beta-carotene 15,15'-monooxygenase activity//	molecular_function//
XLOC_001584	Solyc01g058010.2,Solyc01g058020.2	SL2.50ch01:64953318-64959089	0.684346	0	0	Neutral invertase (AHRD V1 ***- A7LH71_VITVI)%3B contains Interpro domain(s) IPR006937 Plant neutral invertase //Neutral invertase (AHRD V1 ***- A7LH71_VITVI)%3B contains Interpro domain(s) IPR006937 Plant neutral invertase //	GO:0004564//no GOid	beta-fructofuranosidase activity//no GOterm//	molecular_function//no GO_branch//
XLOC_011578	Solyc03g119080.2	SL2.50ch03:67784249-67787175	0	0	-0.6356	Beta-glucosidase (AHRD V1 **** D7L7Z3_ARALY)%3B contains Interpro domain(s) IPR001360 Glycoside hydrolase%2C family 1 //	GO:0080083//	beta-gentiobiose beta-glucosidase activity//	molecular_function//
XLOC_004880	Solyc01g108660.2	SL2.50ch01:95888908-95895859	-0.639966	0	0	N-acetyl-gamma-glutamyl-phosphate reductase (AHRD V1 ***- A7WPL0_TOBAC)%3B contains Interpro domain(s) IPR000706 N-acetyl-gamma-glutamyl-phosphate reductase //	GO:0008800//	beta-lactamase activity//	molecular_function//
XLOC_022586	Solyc08g007400.2	SL2.50ch08:1971045-1978006	0	0	1.01917	Autophagy-related protein 8 (AHRD V1 **-- C1EJ88_9CHLO)%3B contains Interpro domain(s) IPR004241 Light chain 3 (LC3) //	GO:0048487//	beta-tubulin binding//	molecular_function//
XLOC_030783	Solyc11g045110.1	SL2.50ch11:31768027-31781354	0.93478	0	0	Sucrose-phosphate synthase 1 (AHRD V1 ***- Q5EEP9_VITVI)%3B contains Interpro domain(s) IPR012819 Sucrose phosphate synthase%2C plant //	GO:0005923//	bicellular tight junction//	cellular_component//
XLOC_026190	Solyc09g025270.2	SL2.50ch09:72439854-72446547	0.692156	0	0	U-box domain-containing protein 3 (AHRD V1 **-- PUB3_ARATH)%3B contains Interpro domain(s) IPR011989 Armadillo-like helical //	GO:0005488//	binding//	molecular_function//
XLOC_009814	Solyc03g116670.2	SL2.50ch03:65983495-65985772	0.944832	-1.18565	-0.815698	TPR domain protein (AHRD V1 *-*- B6U810_MAIZE)%3B contains Interpro domain(s) IPR011990 Tetratricopeptide-like helical //	GO:0005488//	binding//	molecular_function//
XLOC_025845	Solyc09g074880.2	SL2.50ch09:66690399-66697576	0	0	0.537941	Homology to unknown gene (AHRD V1 ***- Q00YR0_OSTTA)%3B contains Interpro domain(s) IPR013105 Tetratricopeptide TPR2 //	GO:0005488//	binding//	molecular_function//
XLOC_032578	Solyc12g006590.1	SL2.50ch12:1079128-1080563	1.3493	0	1.74195	Zinc finger RAN-binding domain containing 2 (AHRD V1 **** Q7SZF0_DANRE)%3B contains Interpro domain(s) IPR001876 Zinc finger%2C RanBP2-type //	GO:0005488//	binding//	molecular_function//
XLOC_030419	Solyc11g012440.1	SL2.50ch11:5278352-5280911	0.541122	0	0	U-box domain-containing protein 4 (AHRD V1 **-- PUB4_ARATH)%3B contains Interpro domain(s) IPR011989 Armadillo-like helical //	GO:0005488//	binding//	molecular_function//
XLOC_031201	Solyc11g071240.1	SL2.50ch11:54774079-54775706	-2.0233	0	0	U-box domain-containing protein (AHRD V1 *-*- A8IXJ0_BRACM)%3B contains Interpro domain(s) IPR011989 Armadillo-like helical //	GO:0005488//	binding//	molecular_function//
XLOC_010453	Solyc03g043700.2	SL2.50ch03:7224783-7227716	1.84671	0	0	Armadillo/beta-catenin repeat family protein (AHRD V1 **-- D7L0H5_ARALY)%3B contains Interpro domain(s) IPR011989 Armadillo-like helical //	GO:0005488//	binding//	molecular_function//
XLOC_026581	Solyc09g018230.1	SL2.50ch09:13637514-13639727	0	0	-0.588431	U-box domain-containing protein (AHRD V1 ***- D7KBV1_ARALY)%3B contains Interpro domain(s) IPR011989 Armadillo-like helical //	GO:0005488//	binding//	molecular_function//
XLOC_009495	Solyc03g098440.2	SL2.50ch03:60737918-60741708	0	0	0.643739	Small glutamine-rich tetratricopeptide repeat-containing protein A (AHRD V1 *--- C1BM93_OSMMO)%3B contains Interpro domain(s) IPR011990 Tetratricopeptide-like helical //	GO:0005488//	binding//	molecular_function//
XLOC_033486	Solyc12g088360.1	SL2.50ch12:63772403-63774828	1.24239	0	0	U-box domain-containing protein 4 (AHRD V1 **-- PUB4_ARATH)%3B contains Interpro domain(s) IPR011989 Armadillo-like helical //	GO:0005488//	binding//	molecular_function//
XLOC_017952	Solyc06g068130.2	SL2.50ch06:42229005-42231786	1.97607	0	3.54288	TPR domain protein (AHRD V1 *-*- B6U810_MAIZE)%3B contains Interpro domain(s) IPR011990 Tetratricopeptide-like helical //	GO:0005488//	binding//	molecular_function//
XLOC_026038	Solyc09g090930.2	SL2.50ch09:70330001-70334557	0.780599	0	0.864503	TPR domain protein (AHRD V1 *--- B6U810_MAIZE)%3B contains Interpro domain(s) IPR011990 Tetratricopeptide-like helical //	GO:0005488//	binding//	molecular_function//
XLOC_002213	Solyc01g095900.2	SL2.50ch01:87038786-87053680	0.551299	0	1.24888	Protein TIF31 homolog (AHRD V1 *--- TIF31_ASPCL)%3B contains Interpro domain(s) IPR011990 Tetratricopeptide-like helical //	GO:0005488//	binding//	molecular_function//
XLOC_012161	Solyc04g014810.2	SL2.50ch04:5050799-5053600	0.611258	0	0	U-box domain-containing protein 4 (AHRD V1 **-- PUB4_ARATH)%3B contains Interpro domain(s) IPR011989 Armadillo-like helical //	GO:0005488//	binding//	molecular_function//
XLOC_004240	Solyc01g091740.2	SL2.50ch01:85324820-85328784	0.906181	0	0.518899	Armadillo/beta-catenin repeat family protein (AHRD V1 **-- D7LD78_ARALY)%3B contains Interpro domain(s) IPR011989 Armadillo-like helical //	GO:0005488//	binding//	molecular_function//
XLOC_021297	Solyc07g008210.2	SL2.50ch07:2947745-2951040	0	-1.03805	1.27534	TPR domain protein (AHRD V1 *-*- B6U810_MAIZE)%3B contains Interpro domain(s) IPR011990 Tetratricopeptide-like helical //	GO:0005488//	binding//	molecular_function//
XLOC_014990	Solyc05g013410.2	SL2.50ch05:6480259-6484488	1.24696	0	0	Sel1 domain protein repeat-containing protein (AHRD V1 *-*- A0L961_MAGSM)%3B contains Interpro domain(s) IPR011990 Tetratricopeptide-like helical //	GO:0005488//	binding//	molecular_function//
XLOC_004553	Solyc01g100530.2	SL2.50ch01:90533701-90544677	-0.733894	0	0	Protein EFR3 homolog A (AHRD V1 *--- EFR3A_HUMAN)%3B contains Interpro domain(s) IPR016024 Armadillo-type fold //	GO:0005488//	binding//	molecular_function//
XLOC_011558	Solyc03g118680.2	SL2.50ch03:67538263-67542652	-0.611882	0	0	Zinc finger protein (AHRD V1 *--- B6SYQ8_MAIZE)%3B contains Interpro domain(s) IPR001876 Zinc finger%2C RanBP2-type //	GO:0005488//	binding//	molecular_function//
XLOC_012979	Solyc04g077920.2	SL2.50ch04:62778135-62782946	0	0	0.776431	Interferon-related developmental regulator family protein (AHRD V1 ***- B4FQN7_MAIZE)%3B contains Interpro domain(s) IPR007701 Interferon-related developmental regulator%2C N-terminal //	GO:0005488//	binding//	molecular_function//
XLOC_031040	Solyc11g065940.1	SL2.50ch11:51559729-51561448	0.765783	-0.666456	0	Epsin 2-like protein (Fragment) (AHRD V1 *-*- D9HX40_LAGLG)%3B contains Interpro domain(s) IPR001026 Epsin%2C N-terminal //	GO:0005488//	binding//	molecular_function//
XLOC_001771	Solyc01g068490.2	SL2.50ch01:77737532-77740424	0.821312	0	0	U-box domain-containing protein (AHRD V1 **-- Q1ENX4_MUSAC)%3B contains Interpro domain(s) IPR011989 Armadillo-like helical //	GO:0005488//	binding//	molecular_function//
XLOC_014725	Solyc05g006760.2	SL2.50ch05:1385202-1391342	0	0	-0.635046	Tetratricopeptide repeat protein 38 (AHRD V1 ***- TTC38_XENTR)%3B contains Interpro domain(s) IPR011990 Tetratricopeptide-like helical //	GO:0005488//	binding//	molecular_function//
XLOC_031563	Solyc11g011370.1	SL2.50ch11:4411250-4419803	-0.9741	0	0	Condensin complex subunit 3 (AHRD V1 *-*- C0H9G7_SALSA)%3B contains Interpro domain(s) IPR016024 Armadillo-type fold //	GO:0005488//	binding//	molecular_function//
XLOC_009699	Solyc03g114320.2	SL2.50ch03:64330892-64334240	0.708789	0	0	Kinesin light chain (AHRD V1 ***- B6SPN7_MAIZE)%3B contains Interpro domain(s) IPR011990 Tetratricopeptide-like helical //	GO:0005488//	binding//	molecular_function//
XLOC_000935	Solyc01g005160.2	SL2.50ch01:137780-139489	4.50552	0	0	U-box domain-containing protein (AHRD V1 ***- D7MID4_ARALY)%3B contains Interpro domain(s) IPR003613 U box domain //	GO:0005488//	binding//	molecular_function//
XLOC_025697	Solyc09g064630.2	SL2.50ch09:61954060-61958872	0	0	0.745513	TPR domain protein (AHRD V1 *--- B6U810_MAIZE)%3B contains Interpro domain(s) IPR011990 Tetratricopeptide-like helical //	GO:0005488//	binding//	molecular_function//
XLOC_010395	Solyc03g033510.2	SL2.50ch03:5046819-5049282	-1.50258	0	0	Armadillo/beta-catenin repeat family protein (AHRD V1 **-- D7MDH4_ARALY)%3B contains Interpro domain(s) IPR011989 Armadillo-like helical //	GO:0005488//	binding//	molecular_function//
XLOC_027241	Solyc09g083060.2	SL2.50ch09:68733982-68739177	0.720996	0	0.641999	U-box domain-containing protein (AHRD V1 *-*- Q1ENX4_MUSAC)%3B contains Interpro domain(s) IPR003613 U box domain //	GO:0005488//	binding//	molecular_function//
XLOC_006462	Solyc02g088600.2	SL2.50ch02:50640830-50644144	0.828437	-0.582856	0	Pentatricopeptide repeat-containing protein (AHRD V1 ***- D7MRA3_ARALY)%3B contains Interpro domain(s) IPR002885 Pentatricopeptide repeat //	GO:0005488//	binding//	molecular_function//
XLOC_021486	Solyc07g020870.1	SL2.50ch07:14344387-14349988	0	0	-1.04832	U-box domain-containing protein (AHRD V1 *-*- B6V8G2_HELAN)%3B contains Interpro domain(s) IPR017986 WD40 repeat%2C region //	GO:0005488//	binding//	molecular_function//
XLOC_013917	Solyc04g051660.2	SL2.50ch04:50948358-50952752	-0.814577	0	0	TPR repeat (AHRD V1 *-*- Q31KV9_SYNE7)%3B contains Interpro domain(s) IPR011990 Tetratricopeptide-like helical //	GO:0005488//	binding//	molecular_function//
XLOC_019717	Solyc06g076850.2	SL2.50ch06:47741976-47745277	0.788	0	0	Binding protein (AHRD V1 ***- D7LLC0_ARALY)%3B contains Interpro domain(s) IPR011990 Tetratricopeptide-like helical //	GO:0005488//	binding//	molecular_function//
XLOC_021202	Solyc07g006030.2	SL2.50ch07:862864-881052	0	0	1.28731	Protein TIF31 homolog (AHRD V1 *--- TIF31_COCIM)%3B contains Interpro domain(s) IPR011990 Tetratricopeptide-like helical //	GO:0005488//	binding//	molecular_function//
XLOC_007858	Solyc02g083640.2	SL2.50ch02:46970799-46973124	-2.22687	0	0	Male sterility 5 family protein (Fragment) (AHRD V1 *-*- B1Q3A0_BRACM)%3B contains Interpro domain(s) IPR011990 Tetratricopeptide-like helical //	GO:0005488//	binding//	molecular_function//
XLOC_020099	Solyc07g008060.1	SL2.50ch07:2771327-2774218	0.813723	0	0	Phosphatidylinositol binding clathrin assembly protein like (AHRD V1 *--* Q6AXI5_DANRE)%3B contains Interpro domain(s) IPR011417 ANTH //	GO:0005488//	binding//	molecular_function//
XLOC_003122	Solyc01g008160.2	SL2.50ch01:2304524-2306017	-0.654397	0	0	Tetratricopeptide repeat-containing protein (AHRD V1 ***- D7L8H9_ARALY)%3B contains Interpro domain(s) IPR011990 Tetratricopeptide-like helical //	GO:0005488//	binding//	molecular_function//
XLOC_005541	Solyc02g063440.2	SL2.50ch02:35539257-35539911	1.0431	0	0.923694	Unknown Protein (AHRD V1)//	GO:0005488//	binding//	molecular_function//
XLOC_018943	Solyc06g050590.2	SL2.50ch06:33292755-33298644	-0.547238	0	0	Acetyl-CoA carboxylase biotin carboxyl carrier protein (AHRD V1 *-*- D3PS72_MEIRD)%3B contains Interpro domain(s) IPR011053 Single hybrid motif //	GO:0005488//	binding//	molecular_function//
XLOC_009219	Solyc03g082690.2	SL2.50ch03:52611265-52616934	1.16737	0	0	U-box domain-containing protein (AHRD V1 *-*- Q1ENX4_MUSAC)%3B contains Interpro domain(s) IPR011989 Armadillo-like helical //	GO:0005488//	binding//	molecular_function//
XLOC_020065	Solyc07g007390.2	SL2.50ch07:2125492-2130345	0	0	0.679723	At1g62390-like protein (Fragment) (AHRD V1 *--- C0JCT9_9BRAS)%3B contains Interpro domain(s) IPR011990 Tetratricopeptide-like helical //	GO:0005488//	binding//	molecular_function//
XLOC_026178	Solyc09g098490.2	SL2.50ch09:72288770-72296110	-1.44568	0	0	Epsin 2 (AHRD V1 *-*- Q5NCM7_MOUSE)%3B contains Interpro domain(s) IPR001026 Epsin%2C N-terminal //	GO:0005488//	binding//	molecular_function//
XLOC_026071	Solyc09g091600.2	SL2.50ch09:70846119-70848632	-1.08422	-0.510937	-0.699234	Male sterility MS5 family protein (AHRD V1 **-- D7KE75_ARALY)%3B contains Interpro domain(s) IPR011990 Tetratricopeptide-like helical //	GO:0005488//	binding//	molecular_function//
XLOC_031352	Solyc11g006030.1	SL2.50ch11:840423-841716	2.1881	0	1.05885	U-box domain-containing protein (AHRD V1 ***- D7MID4_ARALY)%3B contains Interpro domain(s) IPR003613 U box domain //	GO:0005488//	binding//	molecular_function//
XLOC_024583	Solyc08g076730.2	SL2.50ch08:60681866-60683297	-0.791495	0	0	TPR domain protein (AHRD V1 *-*- B6U810_MAIZE)%3B contains Interpro domain(s) IPR011990 Tetratricopeptide-like helical //	GO:0005488//	binding//	molecular_function//
XLOC_007871	Solyc02g083820.1	SL2.50ch02:47075908-47077876	0.796202	0	0	Armadillo/beta-catenin repeat family protein (AHRD V1 **-- D7MDH4_ARALY)%3B contains Interpro domain(s) IPR011989 Armadillo-like helical //	GO:0005488//	binding//	molecular_function//
XLOC_004359	Solyc01g096200.2	SL2.50ch01:87290999-87301028	1.26151	0	0	Pentatricopeptide repeat-containing protein (AHRD V1 *-*- D7M1E8_ARALY)%3B contains Interpro domain(s) IPR011989 Armadillo-like helical //	GO:0005488//	binding//	molecular_function//
XLOC_018591	Solyc06g008160.2	SL2.50ch06:2042726-2050877	-0.654155	0	0	Chloroplast FLU-like protein (Fragment) (AHRD V1 *--- D2K2R8_PICAB)%3B contains Interpro domain(s) IPR011990 Tetratricopeptide-like helical //	GO:0005488//	binding//	molecular_function//
XLOC_014712	Solyc05g006550.2	SL2.50ch05:1184570-1188743	-1.61891	0	-0.690755	Microtubule-associated protein TORTIFOLIA1 (AHRD V1 *--- B6SS76_MAIZE)%3B contains Interpro domain(s) IPR011989 Armadillo-like helical //	GO:0005488//	binding//	molecular_function//
XLOC_013335	Solyc04g008100.1	SL2.50ch04:1757823-1759152	4.48094	0	0	U-box domain-containing protein (AHRD V1 ***- D7MID4_ARALY)%3B contains Interpro domain(s) IPR003613 U box domain //	GO:0005488//	binding//	molecular_function//
XLOC_012879	Solyc04g074830.1	SL2.50ch04:60747855-60748872	1.7618	0	0	At4g40080-like protein (Fragment) (AHRD V1 ***- B3SK93_ARALY)%3B contains Interpro domain(s) IPR013809 Epsin-like%2C N-terminal //	GO:0005488//	binding//	molecular_function//
XLOC_012692	Solyc04g057940.2	SL2.50ch04:55054137-55060464	1.31152	0	1.08093	U-box domain-containing protein (AHRD V1 *-*- B6V8G2_HELAN)%3B contains Interpro domain(s) IPR017986 WD40 repeat%2C region //	GO:0005488//	binding//	molecular_function//
XLOC_018578	Solyc06g007970.2	SL2.50ch06:1822286-1825354	-2.1943	0	-1.42439	Male sterility 5 family protein (Fragment) (AHRD V1 *--- B1Q393_BRAOT)%3B contains Interpro domain(s) IPR011990 Tetratricopeptide-like helical //	GO:0005488//	binding//	molecular_function//
XLOC_026904	Solyc09g061700.2	SL2.50ch09:60194592-60196997	-2.29801	-0.724682	-1.13599	Male sterility 5 family protein (Fragment) (AHRD V1 *--- B1Q393_BRAOT)%3B contains Interpro domain(s) IPR011990 Tetratricopeptide-like helical //	GO:0005488//	binding//	molecular_function//
XLOC_017768	Solyc06g061240.2	SL2.50ch06:39246665-39248042	0.629165	0	0.65199	Zinc-binding family protein (AHRD V1 **** D7MDD4_ARALY)%3B contains Interpro domain(s) IPR006734 Protein of unknown function DUF597 //	GO:0005488//	binding//	molecular_function//
XLOC_022470	Solyc08g005100.2	SL2.50ch08:70108-72816	0	0	1.09379	Zinc-binding family protein (AHRD V1 **-* D7MDD4_ARALY)%3B contains Interpro domain(s) IPR006734 Protein of unknown function DUF597 //	GO:0005488//	binding//	molecular_function//
XLOC_014293	Solyc04g077610.2	SL2.50ch04:62559057-62561887	0	0.570299	0	U-box domain-containing protein (AHRD V1 ***- D7LSY5_ARALY)%3B contains Interpro domain(s) IPR003613 U box domain //	GO:0005488//	binding//	molecular_function//
XLOC_018289	Solyc06g075640.1	SL2.50ch06:47010205-47013374	-2.08128	0	0	Male sterility 5 family protein (Fragment) (AHRD V1 *--- B1Q393_BRAOT)%3B contains Interpro domain(s) IPR011990 Tetratricopeptide-like helical //	GO:0005488//	binding//	molecular_function//
XLOC_008044	Solyc02g087200.1	SL2.50ch02:49668258-49669704	0.773551	0	0	U-box domain-containing protein 40 (AHRD V1 **-- PUB40_ARATH)%3B contains Interpro domain(s) IPR011989 Armadillo-like helical //	GO:0005488//	binding//	molecular_function//
XLOC_007104	Solyc02g062140.2	SL2.50ch02:33709770-33712287	0	-0.574743	-0.798837	Armadillo/beta-catenin repeat family protein (AHRD V1 ***- D7MDH4_ARALY)%3B contains Interpro domain(s) IPR011989 Armadillo-like helical //	GO:0005488//	binding//	molecular_function//
XLOC_014773	Solyc05g007760.1	SL2.50ch05:2222465-2224064	-1.49897	0	0	SET domain protein (AHRD V1 ***- B9HI95_POPTR)%3B contains Interpro domain(s) IPR011990 Tetratricopeptide-like helical //	GO:0005488//	binding//	molecular_function//
XLOC_015609	Solyc05g052700.2	SL2.50ch05:62905341-62908650	0	0	0.846651	TPR domain protein (AHRD V1 *--- Q7MVN6_PORGI)%3B contains Interpro domain(s) IPR011990 Tetratricopeptide-like helical //	GO:0005488//	binding//	molecular_function//
XLOC_001560	Solyc01g057520.2	SL2.50ch01:61262729-61273643	-0.541729	0	0	Genomic DNA chromosome 3 P1 clone MGD8 (AHRD V1 *--- Q9LUT8_ARATH)%3B contains Interpro domain(s) IPR011989 Armadillo-like helical //	GO:0005488//	binding//	molecular_function//
XLOC_034701	Solyc12g088360.1	SL2.50ch12:63772403-63774828	1.15789	0	0	U-box domain-containing protein 4 (AHRD V1 **-- PUB4_ARATH)%3B contains Interpro domain(s) IPR011989 Armadillo-like helical //	GO:0005488//	binding//	molecular_function//
XLOC_001861	Solyc01g080750.2	SL2.50ch01:79977945-79979355	-1.62324	0	0	HEAT repeat family protein (AHRD V1 **-- B4FX70_MAIZE)%3B contains Interpro domain(s) IPR016024 Armadillo-type fold //	GO:0005488//	binding//	molecular_function//
XLOC_007941	Solyc02g085140.2	SL2.50ch02:48115241-48121042	0.938857	0	0.708677	U-box domain-containing protein (AHRD V1 ***- Q1EPA8_MUSAC)%3B contains Interpro domain(s) IPR011989 Armadillo-like helical //	GO:0005488//	binding//	molecular_function//
XLOC_032592	Solyc12g006810.1	SL2.50ch12:1238397-1242505	0	0	0.85895	Soul heme-binding family protein (AHRD V1 **** D7LZY3_ARALY)%3B contains Interpro domain(s) IPR006917 SOUL haem-binding protein //	GO:0005488//	binding//	molecular_function//
XLOC_003074	Solyc01g007030.2,Solyc01g007040.2	SL2.50ch01:1583239-1584768	1.8148	0	0	U-box domain-containing protein (AHRD V1 ***- D7LU64_ARALY)%3B contains Interpro domain(s) IPR016024 Armadillo-type fold //U-box domain-containing protein (AHRD V1 ***- D7LU64_ARALY)%3B contains Interpro domain(s) IPR003613 U box domain //	GO:0005488//GO:0005488//	binding//binding//	molecular_function//molecular_function//
XLOC_017461	Solyc06g036410.1,Solyc06g036420.1	SL2.50ch06:25974001-25977763	3.21975	0	0	SGT1-2 (AHRD V1 ***- A5H2U4_SOLLC)%3B contains Interpro domain(s) IPR011990 Tetratricopeptide-like helical //SGT1 (AHRD V1 **-- Q84UV7_NICBE)%3B contains Interpro domain(s) IPR007699 SGS //	GO:0005488//GO:0005515//	binding//protein binding//	molecular_function//molecular_function//
XLOC_029656	Solyc10g078250.1,Solyc10g078260.1	SL2.50ch10:60092707-60096721	0	0	1.30888	Peptidyl-prolyl cis-trans isomerase D (AHRD V1 -**- PPID_BOVIN)%3B contains Interpro domain(s) IPR001179 Peptidyl-prolyl cis-trans isomerase%2C FKBP-type //Peptidyl-prolyl cis-trans isomerase (AHRD V1 *--- Q86M29_BRUMA)%3B contains Interpro domain(s) IPR001179 Peptidyl-prolyl cis-trans isomerase%2C FKBP-type //	GO:0005488//GO:0006457//	binding//protein folding//	molecular_function//biological_process//
XLOC_030459	Solyc11g013170.1	SL2.50ch11:6035006-6043373	-0.575763	0	-0.600508	Aminotransferase (AHRD V1 ***- Q67UZ0_ORYSJ)%3B contains Interpro domain(s) IPR004839 Aminotransferase%2C class I and II //	GO:0009058//	biosynthetic process//	biological_process//
XLOC_016087	Solyc05g011860.1	SL2.50ch05:5087919-5088513	1.71023	0	0	Sulfotransferase family protein (AHRD V1 **** D7LZW5_ARALY)%3B contains Interpro domain(s) IPR000863 Sulfotransferase //	GO:0080118//	brassinosteroid sulfotransferase activity//	molecular_function//
XLOC_014919	Solyc05g011890.1,Solyc05g011900.1	SL2.50ch05:5114486-5130824	0.630678	0	0	Sulfotransferase family protein (AHRD V1 **** D7LQL2_ARALY)%3B contains Interpro domain(s) IPR000863 Sulfotransferase //Sulfotransferase family protein (AHRD V1 **** D7LQL2_ARALY)%3B contains Interpro domain(s) IPR000863 Sulfotransferase //	GO:0080118//GO:0080118//	brassinosteroid sulfotransferase activity//brassinosteroid sulfotransferase activity//	molecular_function//molecular_function//
XLOC_014971	Solyc05g012970.2,Solyc05g013010.2	SL2.50ch05:6064819-6127601	0	0.599406	0	Sulfotransferase family protein (AHRD V1 **** D7LQL2_ARALY)%3B contains Interpro domain(s) IPR000863 Sulfotransferase //Sulfotransferase family protein (AHRD V1 **** D7LQL2_ARALY)%3B contains Interpro domain(s) IPR000863 Sulfotransferase //	GO:0080118//GO:0080118//	brassinosteroid sulfotransferase activity//brassinosteroid sulfotransferase activity//	molecular_function//molecular_function//
XLOC_025922	Solyc09g082660.2	SL2.50ch09:68373492-68377004	0.643039	0	-0.577377	Caffeoyl-CoA O-methyltransferase (AHRD V1 **** A9X9L7_BAMOL)%3B contains Interpro domain(s) IPR002935 O-methyltransferase%2C family 3 //	GO:0042409//	caffeoyl-CoA O-methyltransferase activity//	molecular_function//
XLOC_014028	Solyc04g063210.2	SL2.50ch04:55349905-55351995	-1.69277	0	-0.928144	Caffeoyl-CoA O-methyltransferase (AHRD V1 **** A0SDG2_9CONI)%3B contains Interpro domain(s) IPR002935 O-methyltransferase%2C family 3 //	GO:0042409//	caffeoyl-CoA O-methyltransferase activity//	molecular_function//
XLOC_004849	Solyc01g107910.2	SL2.50ch01:95296420-95297841	0.892424	0	1.21224	Caffeoyl CoA 3-O-methyltransferase (AHRD V1 **** Q5I2D1_9ROSI)%3B contains Interpro domain(s) IPR002935 O-methyltransferase%2C family 3 //	GO:0042409//	caffeoyl-CoA O-methyltransferase activity//	molecular_function//
XLOC_008330	Solyc02g093270.2	SL2.50ch02:54178271-54179675	0.63936	0	1.22182	Caffeoyl-CoA O-methyltransferase (AHRD V1 **** A8IFQ7_SOLLC)%3B contains Interpro domain(s) IPR002935 O-methyltransferase%2C family 3 //	GO:0042409//	caffeoyl-CoA O-methyltransferase activity//	molecular_function//
XLOC_008326	Solyc02g093230.2	SL2.50ch02:54162172-54163557	1.27933	0	0	Caffeoyl-CoA O-methyltransferase (AHRD V1 **** A8IFQ7_SOLLC)%3B contains Interpro domain(s) IPR002935 O-methyltransferase%2C family 3 //	GO:0042409//	caffeoyl-CoA O-methyltransferase activity//	molecular_function//
XLOC_015613	Solyc05g052780.2	SL2.50ch05:62962094-62966110	0	0	-0.515787	LIM domain protein (AHRD V1 **-- Q8VWW1_GOSHI)%3B contains Interpro domain(s) IPR001781 Zinc finger%2C LIM-type //	GO:0005246//	calcium channel regulator activity//	molecular_function//
XLOC_019577	Solyc06g073830.1	SL2.50ch06:45588779-45589334	3.14812	0	0	Calmodulin-like protein (AHRD V1 ***- Q0VJ70_DATME)%3B contains Interpro domain(s) IPR011992 EF-Hand type //	GO:0005509//	calcium ion binding//	molecular_function//
XLOC_033924	Solyc12g009630.1	SL2.50ch12:2891489-2892206	1.10583	0	1.17473	Calmodulin-like protein (AHRD V1 *-*- Q6RZU7_MUSAC)%3B contains Interpro domain(s) IPR011992 EF-Hand type //	GO:0005509//	calcium ion binding//	molecular_function//
XLOC_027949	Solyc10g044700.1	SL2.50ch10:27502052-27502445	0	inf	0	EF hand family protein expressed (AHRD V1 ***- Q852G4_ORYSJ)%3B contains Interpro domain(s) IPR018248 EF hand //	GO:0005509//	calcium ion binding//	molecular_function//
XLOC_019979	Solyc07g005900.2	SL2.50ch07:738900-744462	-1.15158	0	0	Calcineurin subunit B (AHRD V1 ***- B6T814_MAIZE)%3B contains Interpro domain(s) IPR011992 EF-Hand type //	GO:0005509//	calcium ion binding//	molecular_function//
XLOC_016737	Solyc05g050750.1	SL2.50ch05:60869963-60911345	0	0	2.49105	Calmodulin-like protein (AHRD V1 ***- Q6RZU7_MUSAC)%3B contains Interpro domain(s) IPR011992 EF-Hand type //	GO:0005509//	calcium ion binding//	molecular_function//
XLOC_029803	Solyc10g081170.1	SL2.50ch10:62302192-62303815	1.04787	0	0	Calmodulin-2 (AHRD V1 ***- D7LFI7_ARALY)%3B contains Interpro domain(s) IPR011992 EF-Hand type //	GO:0005509//	calcium ion binding//	molecular_function//
XLOC_000951	Solyc01g005410.2	SL2.50ch01:286563-290172	1.43102	0	0	Calcium binding protein Caleosin (AHRD V1 **-* A8N0P5_COPC7)%3B contains Interpro domain(s) IPR007736 Caleosin related //	GO:0005509//	calcium ion binding//	molecular_function//
XLOC_020092	Solyc07g007950.1	SL2.50ch07:2646002-2647715	0.875852	0	0	Calmodulin-like protein (AHRD V1 ***- Q6RZU7_MUSAC)%3B contains Interpro domain(s) IPR011992 EF-Hand type //	GO:0005509//	calcium ion binding//	molecular_function//
XLOC_029770	Solyc10g080430.1	SL2.50ch10:61704381-61706706	-1.39781	0	0	Phosphoribosylanthranilate transferase (Fragment) (AHRD V1 *--- Q43085_PEA)%3B contains Interpro domain(s) IPR013583 Phosphoribosyltransferase C-terminal%2C plant //	GO:0005509//	calcium ion binding//	molecular_function//
XLOC_001881	Solyc01g081190.2	SL2.50ch01:80479430-80485218	0.743757	0	0.860835	Calcium-binding EF hand family protein (AHRD V1 **** D7KZ13_ARALY)%3B contains Interpro domain(s) IPR018248 EF hand //	GO:0005509//	calcium ion binding//	molecular_function//
XLOC_009189	Solyc03g080080.2	SL2.50ch03:51981919-51986104	0.619995	0	0.817997	Carbon catabolite repressor protein 4 homolog 3 (AHRD V1 *--- CCR4C_ARATH)%3B contains Interpro domain(s) IPR005135 Endonuclease/exonuclease/phosphatase //	GO:0005509//	calcium ion binding//	molecular_function//
XLOC_011424	Solyc03g115930.1	SL2.50ch03:65502477-65503086	2.83891	0	1.14732	Calmodulin-like protein (AHRD V1 *-*- B6TXW9_MAIZE)%3B contains Interpro domain(s) IPR011992 EF-Hand type //	GO:0005509//	calcium ion binding//	molecular_function//
XLOC_006722	Solyc02g094000.1	SL2.50ch02:54665459-54665885	2.65548	0	0	Calmodulin-like protein (AHRD V1 ***- Q0VJ70_DATME)%3B contains Interpro domain(s) IPR011992 EF-Hand type //	GO:0005509//	calcium ion binding//	molecular_function//
XLOC_006436	Solyc02g088090.1	SL2.50ch02:50279342-50279888	0.857505	0.966478	0.570695	Calmodulin-like protein (AHRD V1 *-*- B6TXW9_MAIZE)%3B contains Interpro domain(s) IPR011992 EF-Hand type //	GO:0005509//	calcium ion binding//	molecular_function//
XLOC_005569	Solyc02g065000.1	SL2.50ch02:36129000-36129522	0	-1.3297	0	Calmodulin-like protein (AHRD V1 ***- Q67TZ4_ORYSJ)%3B contains Interpro domain(s) IPR011992 EF-Hand type //	GO:0005509//	calcium ion binding//	molecular_function//
XLOC_012473	Solyc04g048900.2	SL2.50ch04:38565210-38568669	1.09669	-0.702204	0	Calreticulin 2 calcium-binding protein (AHRD V1 **** A8HMC0_CHLRE)%3B contains Interpro domain(s) IPR009169 Calreticulin //	GO:0005509//	calcium ion binding//	molecular_function//
XLOC_017988	Solyc06g068960.1	SL2.50ch06:42782089-42782554	0.608751	0	0	Calmodulin (AHRD V1 ***- D3PJ43_9MAXI)%3B contains Interpro domain(s) IPR011992 EF-Hand type //	GO:0005509//	calcium ion binding//	molecular_function//
XLOC_012704	Solyc04g058160.1	SL2.50ch04:55253639-55254686	0.968063	0	0	Calmodulin (AHRD V1 ***- B6SMJ0_MAIZE)%3B contains Interpro domain(s) IPR011992 EF-Hand type //	GO:0005509//	calcium ion binding//	molecular_function//
XLOC_023808	Solyc08g007160.2	SL2.50ch08:1710703-1715627	1.15594	0	0	Calcineurin B-like calcium binding protein (AHRD V1 **-* B2ZYT8_VICFA)%3B contains Interpro domain(s) IPR015757 Calcineurin B protein //	GO:0005509//	calcium ion binding//	molecular_function//
XLOC_032357	Solyc11g071740.1	SL2.50ch11:55137761-55138367	2.82351	0	0	Calmodulin-like protein (AHRD V1 ***- Q0VJ70_DATME)%3B contains Interpro domain(s) IPR011992 EF-Hand type //	GO:0005509//	calcium ion binding//	molecular_function//
XLOC_010506	Solyc03g044900.2	SL2.50ch03:10781842-10782851	1.06075	0.948236	0	Calmodulin-like protein 41 (AHRD V1 ***- B6T5H7_MAIZE)%3B contains Interpro domain(s) IPR011992 EF-Hand type //	GO:0005509//	calcium ion binding//	molecular_function//
XLOC_032359	Solyc11g071760.1	SL2.50ch11:55141876-55142473	3.47081	0	0	Calmodulin-like protein (AHRD V1 ***- Q0VJ70_DATME)%3B contains Interpro domain(s) IPR018248 EF hand //	GO:0005509//	calcium ion binding//	molecular_function//
XLOC_033511	Solyc12g088840.1	SL2.50ch12:64057213-64057477	0.759977	0	0	Os07g0619200 protein (Fragment) (AHRD V1 ***- Q0D4L7_ORYSJ)%3B contains Interpro domain(s) IPR018248 EF hand //	GO:0005509//	calcium ion binding//	molecular_function//
XLOC_028311	Solyc10g074740.1	SL2.50ch10:58372987-58373587	0.737296	0	0	Calmodulin-like protein (AHRD V1 ***- Q9ATP2_CENCI)%3B contains Interpro domain(s) IPR011992 EF-Hand type //	GO:0005509//	calcium ion binding//	molecular_function//
XLOC_034921	Solyc12g099990.1	SL2.50ch12:66908224-66911496	0	0	-0.70827	Calmodulin 2 (AHRD V1 ***- Q710C9_BRAOL)%3B contains Interpro domain(s) IPR011992 EF-Hand type //	GO:0005509//	calcium ion binding//	molecular_function//
XLOC_009908	Solyc03g118810.1	SL2.50ch03:67623230-67623725	0	0	-0.629568	Calmodulin (AHRD V1 ***- D8TKN5_VOLCA)%3B contains Interpro domain(s) IPR003299 Flagellar calcium-binding protein (calflagin) //	GO:0005509//	calcium ion binding//	molecular_function//
XLOC_010191	Solyc03g006260.2	SL2.50ch03:879215-885631	0.808876	0.809058	0	Sodium/calcium exchanger family protein (AHRD V1 *-*- D7KKF3_ARALY)%3B contains Interpro domain(s) IPR011992 EF-Hand type //	GO:0005509//	calcium ion binding//	molecular_function//
XLOC_001904	Solyc01g073710.2	SL2.50ch01:81075922-81076666	0	0	-0.606476	Calcium-binding EF hand family protein (AHRD V1 ***- D7LKY8_ARALY)%3B contains Interpro domain(s) IPR011992 EF-Hand type //	GO:0005509//	calcium ion binding//	molecular_function//
XLOC_005033	Solyc01g112170.2	SL2.50ch01:98237507-98242039	0.896991	0	0.555948	Calcium-dependent protein kinase (AHRD V1 **-* Q9S7Z4_MARPO)%3B contains Interpro domain(s) IPR011992 EF-Hand type //	GO:0005509//	calcium ion binding//	molecular_function//
XLOC_014163	Solyc04g073990.2	SL2.50ch04:60016856-60019280	0	0	-0.611766	Annexin (AHRD V1 ***- Q42657_CAPAN)%3B contains Interpro domain(s) IPR009118 Annexin%2C type plant //	GO:0005544//	calcium-dependent phospholipid binding//	molecular_function//
XLOC_011538	Solyc03g118200.2	SL2.50ch03:67135144-67145536	0.821681	0	0	Copine-3 (AHRD V1 ***- B6SK39_MAIZE)%3B contains Interpro domain(s) IPR010734 Copine //	GO:0005544//	calcium-dependent phospholipid binding//	molecular_function//
XLOC_002291	Solyc01g097520.2	SL2.50ch01:88344770-88347023	0.606566	0.580304	0	Annexin 11 (AHRD V1 ***- D6QX28_SOYBN)%3B contains Interpro domain(s) IPR009118 Annexin%2C type plant //	GO:0005544//	calcium-dependent phospholipid binding//	molecular_function//
XLOC_024505	Solyc08g075370.2	SL2.50ch08:59508063-59510900	1.12485	0	0	Unknown Protein (AHRD V1)%3B contains Interpro domain(s) IPR001464 Annexin //	GO:0005544//	calcium-dependent phospholipid binding//	molecular_function//
XLOC_014336	Solyc04g078470.2	SL2.50ch04:63202570-63204421	-1.25846	0.668854	0	Cyclin D3-1 (AHRD V1 ***- Q2ABE7_CAMSI)%3B contains Interpro domain(s) IPR015451 Cyclin D //	GO:0004723//	calcium-dependent protein serine/threonine phosphatase activity//	molecular_function//
XLOC_027231	Solyc09g082870.1	SL2.50ch09:68548529-68551766	2.23501	0.927675	0	Calcium-transporting ATPase 1 (AHRD V1 **** Q7XBH9_CERRI)%3B contains Interpro domain(s) IPR006408 ATPase%2C P-type%2C calcium-transporting%2C PMCA-type //	GO:0005388//	calcium-transporting ATPase activity//	molecular_function//
XLOC_011753	Solyc03g123790.2	SL2.50ch03:70517176-70522756	1.1579	0	0	Calcium/proton exchanger (AHRD V1 **** C4JVH2_UNCRE)%3B contains Interpro domain(s) IPR004713 Calcium/proton exchanger //	GO:0015369//	calcium:proton antiporter activity//	molecular_function//
XLOC_026206	Solyc09g005260.2	SL2.50ch09:191527-195466	1.34669	0.867309	0.803977	Calcium/proton exchanger (AHRD V1 **** C4JVH2_UNCRE)%3B contains Interpro domain(s) IPR004713 Calcium/proton exchanger //	GO:0015369//	calcium:proton antiporter activity//	molecular_function//
XLOC_004474	Solyc01g098800.2	SL2.50ch01:89212817-89220477	1.45463	0	0	Sodium/calcium exchanger family protein (AHRD V1 *-** C5PBJ7_COCP7)%3B contains Interpro domain(s) IPR004837 Sodium/calcium exchanger membrane region //	GO:0005432//	calcium:sodium antiporter activity//	molecular_function//
XLOC_011271	Solyc03g112700.1	SL2.50ch03:63062326-63063319	1.1603	0	0	Calmodulin-binding protein (AHRD V1 **-* D7L4F9_ARALY)%3B contains Interpro domain(s) IPR012442 Protein of unknown function DUF1645 //	GO:0005516//	calmodulin binding//	molecular_function//
XLOC_019329	Solyc06g066430.2	SL2.50ch06:41700515-41703728	-1.40161	0	0	Calmodulin-binding family protein (AHRD V1 **-* Q9ZU28_ARATH)%3B contains Interpro domain(s) IPR000048 IQ calmodulin-binding region //	GO:0005516//	calmodulin binding//	molecular_function//
XLOC_029609	Solyc10g075150.1	SL2.50ch10:58873410-58874963	1.60418	0	1.37878	Non-specific lipid-transfer protein (AHRD V1 **** Q9ZPI9_CAPAN)%3B contains Interpro domain(s) IPR013770 Plant lipid transfer protein and hydrophobic protein%2C helical //	GO:0005516//	calmodulin binding//	molecular_function//
XLOC_007571	Solyc02g077260.2	SL2.50ch02:42250445-42255737	-0.721791	0	0	Calmodulin binding protein (AHRD V1 **-* B6TIB2_MAIZE)%3B contains Interpro domain(s) IPR000048 IQ calmodulin-binding region //	GO:0005516//	calmodulin binding//	molecular_function//
XLOC_004539	Solyc01g100240.2	SL2.50ch01:90311111-90315782	1.74263	0	0	Calmodulin-binding protein (AHRD V1 **** D7L2U6_ARALY)%3B contains Interpro domain(s) IPR012416 Calmodulin binding protein-like //	GO:0005516//	calmodulin binding//	molecular_function//
XLOC_017143	Solyc06g005780.1	SL2.50ch06:812313-812670	-2.52343	0	0	Non-specific lipid-transfer protein (AHRD V1 ***- A8YPK3_HORVU)%3B contains Interpro domain(s) IPR013770 Plant lipid transfer protein and hydrophobic protein%2C helical //	GO:0005516//	calmodulin binding//	molecular_function//
XLOC_024876	Solyc08g083240.2	SL2.50ch08:65757262-65759544	-2.1676	0	-0.606746	Calmodulin-binding protein family-like (AHRD V1 **-* Q6YXT2_ORYSJ)%3B contains Interpro domain(s) IPR000048 IQ calmodulin-binding region //	GO:0005516//	calmodulin binding//	molecular_function//
XLOC_005989	Solyc02g079040.2	SL2.50ch02:43663621-43670769	0.921391	0	0	Calmodulin-binding protein (Fragment) (AHRD V1 *-** Q9M451_CICAR)%3B contains Interpro domain(s) IPR012416 Calmodulin binding protein-like //	GO:0005516//	calmodulin binding//	molecular_function//
XLOC_001129	Solyc01g009340.2	SL2.50ch01:3537685-3541932	-1.97271	0	0	Calmodulin-binding protein family-like (AHRD V1 **-* Q6YXT2_ORYSJ)%3B contains Interpro domain(s) IPR000048 IQ calmodulin-binding region //	GO:0005516//	calmodulin binding//	molecular_function//
XLOC_013010	Solyc04g078550.2	SL2.50ch04:63259220-63261046	0.892782	0.540282	0	WRKY transcription factor 2 (AHRD V1 ***- A7UGC9_SOLTU)%3B contains Interpro domain(s) IPR003657 DNA-binding WRKY //	GO:0005516//	calmodulin binding//	molecular_function//
XLOC_009675	Solyc03g113940.2	SL2.50ch03:63986896-63989607	1.52235	0	0	Calmodulin-binding protein (AHRD V1 **** D7MMC2_ARALY)%3B contains Interpro domain(s) IPR012416 Calmodulin binding protein-like //	GO:0005516//	calmodulin binding//	molecular_function//
XLOC_011585	Solyc03g119250.2	SL2.50ch03:67890015-67892889	1.89371	0.768476	0	Calmodulin-binding protein (AHRD V1 **** Q9FKL6_ARATH)%3B contains Interpro domain(s) IPR012416 Calmodulin binding protein-like //	GO:0005516//	calmodulin binding//	molecular_function//
XLOC_009676	Solyc03g113950.2	SL2.50ch03:64002906-64006032	0.790791	0	0	Calmodulin-binding protein (AHRD V1 **** Q9FKL6_ARATH)%3B contains Interpro domain(s) IPR012416 Calmodulin binding protein-like //	GO:0005516//	calmodulin binding//	molecular_function//
XLOC_008758	Solyc03g033590.1	SL2.50ch03:5152660-5152960	0	0	1.78863	Auxin-induced SAUR-like protein (AHRD V1 ***- Q8S349_CAPAN)%3B contains Interpro domain(s) IPR003676 Auxin responsive SAUR protein //	GO:0005516//	calmodulin binding//	molecular_function//
XLOC_023182	Solyc08g067540.1	SL2.50ch08:56552775-56553138	0.710027	0	0	Non-specific lipid-transfer protein (AHRD V1 ***- Q2QKE7_CATRO)%3B contains Interpro domain(s) IPR013770 Plant lipid transfer protein and hydrophobic protein%2C helical //	GO:0005516//	calmodulin binding//	molecular_function//
XLOC_022674	Solyc08g014280.2	SL2.50ch08:4065059-4070217	-0.747565	0	0	Calmodulin-binding protein family-like (AHRD V1 *--* Q6YXT2_ORYSJ)%3B contains Interpro domain(s) IPR000048 IQ calmodulin-binding region //	GO:0005516//	calmodulin binding//	molecular_function//
XLOC_017221	Solyc06g008610.2	SL2.50ch06:2512502-2514892	0.548134	0	0	WRKY transcription factor 25 (AHRD V1 ***- C9DI14_9ROSI)%3B contains Interpro domain(s) IPR003657 DNA-binding WRKY //	GO:0005516//	calmodulin binding//	molecular_function//
XLOC_013933	Solyc04g052970.1	SL2.50ch04:51296010-51296322	0	0	inf	Auxin-induced SAUR-like protein (AHRD V1 ***- Q8S351_CAPAN)%3B contains Interpro domain(s) IPR003676 Auxin responsive SAUR protein //	GO:0005516//	calmodulin binding//	molecular_function//
XLOC_010930	Solyc03g083970.2	SL2.50ch03:53922431-53925268	-0.80087	0	-0.628794	IQ calmodulin-binding motif family protein (AHRD V1 **** B6TKK9_MAIZE)//	GO:0005516//	calmodulin binding//	molecular_function//
XLOC_026157	Solyc09g098160.2	SL2.50ch09:72041698-72043758	0	0.96669	0	Pirin-like protein (AHRD V1 ***- B6TZU6_MAIZE)%3B contains Interpro domain(s) IPR012093 Pirin //	GO:0005516//	calmodulin binding//	molecular_function//
XLOC_002235	Solyc01g096340.2	SL2.50ch01:87414600-87415334	0.531363	0	0.962884	Auxin-induced SAUR-like protein (AHRD V1 ***- Q8S351_CAPAN)%3B contains Interpro domain(s) IPR003676 Auxin responsive SAUR protein //	GO:0005516//	calmodulin binding//	molecular_function//
XLOC_023048	Solyc08g062940.2	SL2.50ch08:52373371-52378128	0	0.910645	0	Calmodulin binding protein (AHRD V1 **-* B6T951_MAIZE)%3B contains Interpro domain(s) IPR000048 IQ calmodulin-binding region //	GO:0005516//	calmodulin binding//	molecular_function//
XLOC_026364	Solyc09g009770.2	SL2.50ch09:3250242-3254124	-0.57616	0	0	Calmodulin binding protein (AHRD V1 **** B6SL12_MAIZE)//	GO:0005516//	calmodulin binding//	molecular_function//
XLOC_014303	Solyc04g077830.2	SL2.50ch04:62711219-62714104	-1.71568	0	-1.04967	Calmodulin-binding protein (AHRD V1 **-* Q7XJB9_ORYSI)%3B contains Interpro domain(s) IPR011990 Tetratricopeptide-like helical //	GO:0005516//	calmodulin binding//	molecular_function//
XLOC_013143	Solyc04g081210.2	SL2.50ch04:65210003-65215795	-0.552179	0	0	Calmodulin binding protein IQ (AHRD V1 *--* A8CF59_BRACM)%3B contains Interpro domain(s) IPR000048 IQ calmodulin-binding region //	GO:0005516//	calmodulin binding//	molecular_function//
XLOC_027720	Solyc10g009210.2	SL2.50ch10:3201599-3211153	1.3944	0	0.624726	Calmodulin-binding protein (Fragment) (AHRD V1 *-** Q9M451_CICAR)%3B contains Interpro domain(s) IPR012416 Calmodulin binding protein-like //	GO:0005516//	calmodulin binding//	molecular_function//
XLOC_011708	Solyc03g121760.2	SL2.50ch03:69830077-69832575	-1.01334	0	0	Calmodulin binding protein (AHRD V1 **-* B6T951_MAIZE)%3B contains Interpro domain(s) IPR000048 IQ calmodulin-binding region //	GO:0005516//	calmodulin binding//	molecular_function//
XLOC_025624	Solyc09g059990.1	SL2.50ch09:57024052-57024796	-0.923499	0	0	Zinc finger family protein (AHRD V1 ***- D7MVE2_ARALY)%3B contains Interpro domain(s) IPR018957 Zinc finger%2C C3HC4 RING-type //	GO:0005516//	calmodulin binding//	molecular_function//
XLOC_014742	Solyc05g007130.2	SL2.50ch05:1693162-1699594	-0.733481	0	0	Calmodulin binding protein (AHRD V1 **-* B6T984_MAIZE)%3B contains Interpro domain(s) IPR000048 IQ calmodulin-binding region //	GO:0005516//	calmodulin binding//	molecular_function//
XLOC_009673	Solyc03g113920.2	SL2.50ch03:63968616-63974772	0.615357	0	0	Calmodulin-binding protein (AHRD V1 **** D7MMC2_ARALY)%3B contains Interpro domain(s) IPR012416 Calmodulin binding protein-like //	GO:0005516//	calmodulin binding//	molecular_function//
XLOC_023181	Solyc08g067530.1	SL2.50ch08:56548524-56548878	-1.84774	0	-0.89959	Non-specific lipid-transfer protein (AHRD V1 ***- Q850K5_VITVI)%3B contains Interpro domain(s) IPR013770 Plant lipid transfer protein and hydrophobic protein%2C helical //	GO:0005516//	calmodulin binding//	molecular_function//
XLOC_025364	Solyc09g018010.2	SL2.50ch09:12593646-12594913	-0.944241	0	0	Non-specific lipid-transfer protein (AHRD V1 **** Q8H6L4_SOLTU)%3B contains Interpro domain(s) IPR013770 Plant lipid transfer protein and hydrophobic protein%2C helical //	GO:0005516//	calmodulin binding//	molecular_function//
XLOC_023179	Solyc08g067510.1	SL2.50ch08:56518885-56519254	0.758638	0	0	Non-specific lipid-transfer protein (AHRD V1 **** Q93YX9_DAVIN)%3B contains Interpro domain(s) IPR013770 Plant lipid transfer protein and hydrophobic protein%2C helical //	GO:0005516//	calmodulin binding//	molecular_function//
XLOC_001996	Solyc01g088250.2	SL2.50ch01:83063868-83066606	0.678992	0	0	IQ-domain 11 (AHRD V1 ***- D7M5A6_ARALY)%3B contains Interpro domain(s) IPR000048 IQ calmodulin-binding region //	GO:0005516//	calmodulin binding//	molecular_function//
XLOC_018594	Solyc06g008230.2	SL2.50ch06:2101452-2108159	0.636089	0	0	Calmodulin-binding protein (AHRD V1 **-* Q7XJB9_ORYSI)%3B contains Interpro domain(s) IPR011990 Tetratricopeptide-like helical //	GO:0005516//	calmodulin binding//	molecular_function//
XLOC_022316	Solyc07g065160.2	SL2.50ch07:67044618-67047344	1.79996	0	1.36625	Pirin (AHRD V1 ***- D7RJ70_CARPA)%3B contains Interpro domain(s) IPR012093 Pirin //	GO:0005516//	calmodulin binding//	molecular_function//
XLOC_009678	Solyc03g113980.2	SL2.50ch03:64037058-64040963	2.05062	0	0	Calmodulin-binding protein (AHRD V1 **** Q9FKL6_ARATH)%3B contains Interpro domain(s) IPR012416 Calmodulin binding protein-like //	GO:0005516//	calmodulin binding//	molecular_function//
XLOC_013831	Solyc04g050050.2	SL2.50ch04:45319461-45323000	-1.23192	0	0	Calmodulin-binding protein (AHRD V1 **-* C5HYF8_BRARP)%3B contains Interpro domain(s) IPR000048 IQ calmodulin-binding region //	GO:0005516//	calmodulin binding//	molecular_function//
XLOC_018924	Solyc06g050300.1	SL2.50ch06:32876437-32878935	0.802836	0	0	CBL-interacting protein kinase 13 (AHRD V1 **** C4P7W2_VITVI)%3B contains Interpro domain(s) IPR002290 Serine/threonine protein kinase //	GO:0004683//	calmodulin-dependent protein kinase activity//	molecular_function//
XLOC_019040	Solyc06g053620.2	SL2.50ch06:36452828-36454428	-0.683879	0	0	Calcium-dependent protein kinase 2 (AHRD V1 **** B4FZS4_MAIZE)%3B contains Interpro domain(s) IPR002290 Serine/threonine protein kinase //	GO:0004683//	calmodulin-dependent protein kinase activity//	molecular_function//
XLOC_013180	Solyc04g081910.2	SL2.50ch04:65772075-65777008	0.936733	0	0	Calcium-dependent protein kinase (AHRD V1 **** Q8RW36_SOLLC)%3B contains Interpro domain(s) IPR002290 Serine/threonine protein kinase //	GO:0004683//	calmodulin-dependent protein kinase activity//	molecular_function//
XLOC_025943	Solyc09g083100.1	SL2.50ch09:68783040-68784345	0	0	1.46424	CBL-interacting protein kinase 20 (AHRD V1 **** C4P7W9_VITVI)%3B contains Interpro domain(s) IPR002290 Serine/threonine protein kinase //	GO:0004683//	calmodulin-dependent protein kinase activity//	molecular_function//
XLOC_007873	Solyc02g083850.2	SL2.50ch02:47112078-47117181	1.81025	0	0	Calcium-dependent protein kinase (AHRD V1 **** C6KGT3_SOLLC)%3B contains Interpro domain(s) IPR002290 Serine/threonine protein kinase //	GO:0004683//	calmodulin-dependent protein kinase activity//	molecular_function//
XLOC_017867	Solyc06g065380.2	SL2.50ch06:40801811-40806023	1.08258	0	0	Calcium-dependent protein kinase 4 (AHRD V1 **** D7LXA9_ARALY)%3B contains Interpro domain(s) IPR002290 Serine/threonine protein kinase //	GO:0004683//	calmodulin-dependent protein kinase activity//	molecular_function//
XLOC_010397	Solyc03g033540.2	SL2.50ch03:5075973-5083464	1.26157	0	0	Calcium-dependent protein kinase (AHRD V1 **** C6KGT3_SOLLC)%3B contains Interpro domain(s) IPR002290 Serine/threonine protein kinase //	GO:0004683//	calmodulin-dependent protein kinase activity//	molecular_function//
XLOC_013411	Solyc04g009800.2	SL2.50ch04:3108502-3114299	0.541182	0	0	Calcium-dependent protein kinase 2 (AHRD V1 **** Q93YF4_TOBAC)%3B contains Interpro domain(s) IPR002290 Serine/threonine protein kinase //	GO:0004683//	calmodulin-dependent protein kinase activity//	molecular_function//
XLOC_006551	Solyc02g090510.2	SL2.50ch02:52050980-52056258	-0.663312	0	0	Calcium-dependent protein kinase-like (AHRD V1 **** Q9LET1_ARATH)%3B contains Interpro domain(s) IPR002290 Serine/threonine protein kinase //	GO:0004683//	calmodulin-dependent protein kinase activity//	molecular_function//
XLOC_008196	Solyc02g090390.2	SL2.50ch02:51942514-51948136	0	0	-0.607549	Serine-threonine protein kinase (AHRD V1 **** O24395_WHEAT)%3B contains Interpro domain(s) IPR015740 Plant protein serine/threonine kinase-like //	GO:0004683//	calmodulin-dependent protein kinase activity//	molecular_function//
XLOC_002791	Solyc01g108400.2	SL2.50ch01:95736385-95742610	0.634961	0	0	Calcium-dependent protein kinase-like (AHRD V1 **** Q9LET1_ARATH)%3B contains Interpro domain(s) IPR002290 Serine/threonine protein kinase //	GO:0004683//	calmodulin-dependent protein kinase activity//	molecular_function//
XLOC_025377	Solyc09g018280.1	SL2.50ch09:14009432-14010764	0	0.814236	0.794332	Calcium/calmodulin-dependent protein kinase type 1 (AHRD V1 *-** KCC1A_MOUSE)%3B contains Interpro domain(s) IPR002290 Serine/threonine protein kinase //	GO:0004683//	calmodulin-dependent protein kinase activity//	molecular_function//
XLOC_011358	Solyc03g114580.2	SL2.50ch03:64520076-64532203	0.93198	0	0	Uridine kinase (AHRD V1 *-*- C3SA58_BRADI)%3B contains Interpro domain(s) IPR000764 Uridine kinase //	GO:0006171//	cAMP biosynthetic process//	biological_process//
XLOC_006894	Solyc02g021440.2	SL2.50ch02:22714573-22721638	0.528209	0	0	CBL-interacting protein kinase 04 (AHRD V1 **** A5BQ82_VITVI)%3B contains Interpro domain(s) IPR002290 Serine/threonine protein kinase //	GO:0004691//	cAMP-dependent protein kinase activity//	molecular_function//
XLOC_024738	Solyc08g080360.2	SL2.50ch08:63663882-63666252	0.669947	0	0	F-box protein PP2-B1 (AHRD V1 ***- PP2B1_ARATH)%3B contains Interpro domain(s) IPR001810 Cyclin-like F-box //	GO:0030246//	carbohydrate binding//	molecular_function//
XLOC_025288	Solyc09g014400.2	SL2.50ch09:6028036-6031223	0	0	0.541536	Alpha-amylase (AHRD V1 *--- B9LEH8_CHLSY)%3B contains Interpro domain(s) IPR002044 Glycoside hydrolase%2C carbohydrate-binding //	GO:0030246//	carbohydrate binding//	molecular_function//
XLOC_016978	Solyc05g055870.2	SL2.50ch05:65336698-65339030	1.79778	0	1.1859	F-box protein PP2-B1 (AHRD V1 ***- PP2B1_ARATH)//	GO:0030246//	carbohydrate binding//	molecular_function//
XLOC_018373	Solyc06g082150.2	SL2.50ch06:48052582-48067079	0	0	0.970486	6-phosphofructo-2-kinase/fructose-2 6-biphosphatase 4 (AHRD V1 *-*- Q7T325_DANRE)%3B contains Interpro domain(s) IPR016260 Bifunctional 6-phosphofructo-2-kinase/fructose-2%2C 6-bisphosphate 2-phosphatase //	GO:0030246//	carbohydrate binding//	molecular_function//
XLOC_004525	Solyc01g099990.2	SL2.50ch01:90080017-90081779	2.3471	0	0	F-box protein PP2-B1 (AHRD V1 ***- PP2B1_ARATH)%3B contains Interpro domain(s) IPR001810 Cyclin-like F-box //	GO:0030246//	carbohydrate binding//	molecular_function//
XLOC_034691	Solyc12g088050.1	SL2.50ch12:63541647-63546149	0	0	-1.54702	Rhamnogalacturonate lyase (AHRD V1 ***- A3XLZ2_LEEBM)%3B contains Interpro domain(s) IPR010325 Rhamnogalacturonate lyase //	GO:0030246//	carbohydrate binding//	molecular_function//
XLOC_030360	Solyc11g011310.1	SL2.50ch11:4355385-4362151	-1.46837	1.30087	1.17432	Rhamnogalacturonate lyase (AHRD V1 ***- A3XLZ2_LEEBM)%3B contains Interpro domain(s) IPR010325 Rhamnogalacturonate lyase //	GO:0030246//	carbohydrate binding//	molecular_function//
XLOC_007359	Solyc02g069020.2	SL2.50ch02:38960319-38975367	1.15917	0	0	Phloem protein 2 (AHRD V1 **-- D0R6I5_MALDO)//	GO:0030246//	carbohydrate binding//	molecular_function//
XLOC_004527	Solyc01g100010.2	SL2.50ch01:90088143-90090220	1.13028	0	-0.775406	F-box protein PP2-B1 (AHRD V1 ***- PP2B1_ARATH)%3B contains Interpro domain(s) IPR001810 Cyclin-like F-box //	GO:0030246//	carbohydrate binding//	molecular_function//
XLOC_007362	Solyc02g069060.2	SL2.50ch02:39033489-39034511	inf	inf	inf	Phloem lectin (AHRD V1 --*- Q8LK67_9ROSI)//	GO:0030246//	carbohydrate binding//	molecular_function//
XLOC_007360	Solyc02g069030.2,Solyc02g069040.2	SL2.50ch02:38976035-38979621	0.874086	-0.936129	0	Phloem protein 2 (AHRD V1 **-- D0R6I5_MALDO)//Phloem protein 2 (AHRD V1 ***- Q9LLT3_CUCMO)//	GO:0030246//GO:0030246//	carbohydrate binding//carbohydrate binding//	molecular_function//molecular_function//
XLOC_014314	Solyc04g078010.2	SL2.50ch04:62881516-62883084	-2.90994	0	0	Unknown Protein (AHRD V1)%3B contains Interpro domain(s) IPR001944 Glycoside hydrolase%2C family 35 //	GO:0005975//	carbohydrate metabolic process//	biological_process//
XLOC_030315	Solyc11g010350.1	SL2.50ch11:3423971-3432917	-0.940003	0	0	Glucan 1 3-beta-glucosidase (AHRD V1 *-*- C1H4T0_PARBA)%3B contains Interpro domain(s) IPR001547 Glycoside hydrolase%2C family 5 //	GO:0005975//	carbohydrate metabolic process//	biological_process//
XLOC_021294	Solyc07g008150.2	SL2.50ch07:2853399-2858349	1.07703	0	0	Glucan endo-1 3-beta-glucosidase 7 (AHRD V1 ***- B6SUM3_MAIZE)%3B contains Interpro domain(s) IPR000490 Glycoside hydrolase%2C family 17 //	GO:0005975//	carbohydrate metabolic process//	biological_process//
XLOC_032012	Solyc11g040330.1	SL2.50ch11:37865184-37873892	1.41082	0	0.72539	Endo-1 4-beta-xylanase (AHRD V1 **-- B6SW51_MAIZE)%3B contains Interpro domain(s) IPR013781 Glycoside hydrolase%2C subgroup%2C catalytic core //	GO:0005975//	carbohydrate metabolic process//	biological_process//
XLOC_013118	Solyc04g080620.2	SL2.50ch04:64733642-64737733	-1.13992	0	0	Mannan endo-1 4-beta-mannosidase (AHRD V1 ***- A8FDC6_BACP2)%3B contains Interpro domain(s) IPR013781 Glycoside hydrolase%2C subgroup%2C catalytic core //	GO:0005975//	carbohydrate metabolic process//	biological_process//
XLOC_033214	Solyc12g040640.1	SL2.50ch12:43185191-43190400	2.7992	0	0	Beta-glucosidase (AHRD V1 ***- D7L7Z3_ARALY)%3B contains Interpro domain(s) IPR001360 Glycoside hydrolase%2C family 1 //	GO:0005975//	carbohydrate metabolic process//	biological_process//
XLOC_029563	Solyc10g055800.1	SL2.50ch10:57410646-57411787	-0.982362	0	-1.21698	Chitinase (AHRD V1 ***- B9VRK7_CAPAN)%3B contains Interpro domain(s) IPR016283 Glycoside hydrolase%2C family 19 //	GO:0005975//	carbohydrate metabolic process//	biological_process//
XLOC_032766	Solyc12g011030.1	SL2.50ch12:3892611-3893717	2.27597	0.821394	0	Xyloglucan endotransglucosylase/hydrolase 7 (AHRD V1 ***- C0IRG6_ACTDE)%3B contains Interpro domain(s) IPR016455 Xyloglucan endotransglucosylase/hydrolase //	GO:0005975//	carbohydrate metabolic process//	biological_process//
XLOC_033601	Solyc12g096730.1	SL2.50ch12:65525542-65527299	1.55593	0	0	Polygalacturonase (AHRD V1 ***- O22610_SOLLC)%3B contains Interpro domain(s) IPR000408 Regulator of chromosome condensation%2C RCC1 IPR000743 Glycoside hydrolase%2C family 28 //	GO:0005975//	carbohydrate metabolic process//	biological_process//
XLOC_034100	Solyc12g017240.1	SL2.50ch12:6426368-6427448	1.80014	0.712698	0	Xyloglucan endotransglucosylase/hydrolase 7 (AHRD V1 ***- C0IRG6_ACTDE)%3B contains Interpro domain(s) IPR016455 Xyloglucan endotransglucosylase/hydrolase //	GO:0005975//	carbohydrate metabolic process//	biological_process//
XLOC_031054	Solyc11g066270.1	SL2.50ch11:52001273-52003378	1.72591	0	1.64436	Xyloglucan endotransglucosylase/hydrolase 9 (AHRD V1 ***- C0IRI2_MALDO)%3B contains Interpro domain(s) IPR016455 Xyloglucan endotransglucosylase/hydrolase //	GO:0005975//	carbohydrate metabolic process//	biological_process//
XLOC_034702	Solyc12g088410.1	SL2.50ch12:63801931-63803640	-1.56833	0	0	Unknown Protein (AHRD V1)%3B contains Interpro domain(s) IPR001944 Glycoside hydrolase%2C family 35 //	GO:0005975//	carbohydrate metabolic process//	biological_process//
XLOC_009854	Solyc03g117550.1	SL2.50ch03:66689914-66692017	-0.780984	0	0	Receptor protein kinase-like (AHRD V1 *-*- Q5JN26_ORYSJ)%3B contains Interpro domain(s) IPR002290 Serine/threonine protein kinase //	GO:0005975//	carbohydrate metabolic process//	biological_process//
XLOC_012507	Solyc04g049850.2	SL2.50ch04:43679363-43688534	0	0	0.597152	Uncharacterized conserved protein (AHRD V1 *--- Q2S8S5_HAHCH)%3B contains Interpro domain(s) IPR003734 Protein of unknown function DUF155 //	GO:0005975//	carbohydrate metabolic process//	biological_process//
XLOC_028750	Solyc10g086730.1	SL2.50ch10:65476255-65479645	-0.628166	0	0	Fructose-1 6-bisphosphatase class 1 (AHRD V1 ***- D0MHZ8_RHOM4)%3B contains Interpro domain(s) IPR000146 Fructose-1%2C6-bisphosphatase //	GO:0005975//	carbohydrate metabolic process//	biological_process//
XLOC_011131	Solyc03g098140.2	SL2.50ch03:60468216-60472117	0.631729	0	0	Arabinose-5-phosphate isomerase (AHRD V1 ***- B0TYU5_FRAP2)%3B contains Interpro domain(s) IPR004800 KpsF/GutQ //	GO:0005975//	carbohydrate metabolic process//	biological_process//
XLOC_016697	Solyc05g049980.2	SL2.50ch05:59823346-59826939	-2.66175	0	-0.697011	Glycoside hydrolase family 28 protein/polygalacturonase family protein (AHRD V1 **-- Q1PF10_ARATH)%3B contains Interpro domain(s) IPR012334 Pectin lyase fold //	GO:0005975//	carbohydrate metabolic process//	biological_process//
XLOC_008607	Solyc03g007230.2	SL2.50ch03:1792294-1794888	-0.792461	0	-0.519956	Protein phosphatase 2C (AHRD V1 ***- B1B5N6_PHYPA)%3B contains Interpro domain(s) IPR015655 Protein phosphatase 2C //	GO:0005975//	carbohydrate metabolic process//	biological_process//
XLOC_032646	Solyc12g008840.1	SL2.50ch12:2183702-2190689	-0.638371	-0.556887	0	Beta-galactosidase (AHRD V1 ***- O81100_SOLLC)%3B contains Interpro domain(s) IPR001944 Glycoside hydrolase%2C family 35 //	GO:0005975//	carbohydrate metabolic process//	biological_process//
XLOC_019687	Solyc06g076170.2	SL2.50ch06:47302733-47304557	-3.35628	0	0	Glucan endo-1 3-beta-glucosidase (AHRD V1 ***- B6U1F1_MAIZE)%3B contains Interpro domain(s) IPR013781 Glycoside hydrolase%2C subgroup%2C catalytic core //	GO:0005975//	carbohydrate metabolic process//	biological_process//
XLOC_034670	Solyc12g056960.1	SL2.50ch12:63038886-63044550	0.908458	0	0	Glucan 1 3-beta-glucosidase (AHRD V1 ***- C1H4T0_PARBA)%3B contains Interpro domain(s) IPR001547 Glycoside hydrolase%2C family 5 //	GO:0005975//	carbohydrate metabolic process//	biological_process//
XLOC_031116	Solyc11g068440.1	SL2.50ch11:53169962-53176044	2.22287	0	0	Glucan endo-1 3-beta-glucosidase 7 (AHRD V1 ***- B6T478_MAIZE)%3B contains Interpro domain(s) IPR000490 Glycoside hydrolase%2C family 17 //	GO:0005975//	carbohydrate metabolic process//	biological_process//
XLOC_011286	Solyc03g113030.2	SL2.50ch03:63326182-63328417	-0.643362	0	0	Aldose 1-epimerase-like protein (AHRD V1 ***- Q8LFH1_ARATH)%3B contains Interpro domain(s) IPR015443 Aldose-1-epimerase //	GO:0005975//	carbohydrate metabolic process//	biological_process//
XLOC_023608	Solyc08g081480.2	SL2.50ch08:64527641-64534296	-0.802435	0	0	Polygalacturonase-like protein (AHRD V1 **-- Q84LI7_FRAAN)%3B contains Interpro domain(s) IPR012334 Pectin lyase fold //	GO:0005975//	carbohydrate metabolic process//	biological_process//
XLOC_018317	Solyc06g076130.2	SL2.50ch06:47269401-47272606	1.70781	0	0.889462	Unknown Protein (AHRD V1)//	GO:0005975//	carbohydrate metabolic process//	biological_process//
XLOC_004571	Solyc01g100980.2	SL2.50ch01:90853499-90856129	-0.991294	0	0	Polygalacturonase (AHRD V1 ***- B6TPQ7_MAIZE)%3B contains Interpro domain(s) IPR012334 Pectin lyase fold //	GO:0005975//	carbohydrate metabolic process//	biological_process//
XLOC_029220	Solyc10g044710.1	SL2.50ch10:27509846-27520955	0	0	0.672978	TPR repeat (AHRD V1 ***- Q2HW44_MEDTR)%3B contains Interpro domain(s) IPR011990 Tetratricopeptide-like helical //	GO:0005975//	carbohydrate metabolic process//	biological_process//
XLOC_028749	Solyc10g086720.1	SL2.50ch10:65473498-65475634	0	0	2.28936	Fructose-1 6-bisphosphatase class 1 (AHRD V1 ***- D3PE46_DEFDS)%3B contains Interpro domain(s) IPR000146 Fructose-1%2C6-bisphosphatase //	GO:0005975//	carbohydrate metabolic process//	biological_process//
XLOC_023711	Solyc08g005000.2	SL2.50ch08:2177-6046	-0.672842	0	0	Glucan endo-1 3-beta-glucosidase 3 (AHRD V1 ***- B6TLN1_MAIZE)%3B contains Interpro domain(s) IPR013781 Glycoside hydrolase%2C subgroup%2C catalytic core //	GO:0005975//	carbohydrate metabolic process//	biological_process//
XLOC_032632	Solyc12g008580.1	SL2.50ch12:1968485-1973823	-0.983807	0	0	Glucan endo-1 3-beta-glucosidase 4 (AHRD V1 ***- B6TCY1_MAIZE)%3B contains Interpro domain(s) IPR000490 Glycoside hydrolase%2C family 17 //	GO:0005975//	carbohydrate metabolic process//	biological_process//
XLOC_014648	Solyc05g005170.2	SL2.50ch05:159154-162491	-2.93097	0.632668	0	Polygalacturonase 2 (AHRD V1 ***- A8D0T9_ONCHC)%3B contains Interpro domain(s) IPR012334 Pectin lyase fold //	GO:0005975//	carbohydrate metabolic process//	biological_process//
XLOC_022299	Solyc07g064870.2	SL2.50ch07:66846712-66852330	0.853126	0	0	Endoglucanase 1 (AHRD V1 ***- B6U0J0_MAIZE)%3B contains Interpro domain(s) IPR001701 Glycoside hydrolase%2C family 9 //	GO:0005975//	carbohydrate metabolic process//	biological_process//
XLOC_029859	Solyc10g083300.1	SL2.50ch10:63123099-63127293	0	0	1.15818	Beta-fructofuranosidase insoluble isoenzyme 2 (AHRD V1 **-- B6U1H5_MAIZE)%3B contains Interpro domain(s) IPR001362 Glycoside hydrolase%2C family 32 //	GO:0005975//	carbohydrate metabolic process//	biological_process//
XLOC_028918	Solyc10g008300.2	SL2.50ch10:2446484-2451132	0	0	-0.691727	Mannan endo-1 4-beta-mannosidase (AHRD V1 ***- A8FDC6_BACP2)%3B contains Interpro domain(s) IPR001547 Glycoside hydrolase%2C family 5 //	GO:0005975//	carbohydrate metabolic process//	biological_process//
XLOC_019112	Solyc06g060170.2	SL2.50ch06:38129431-38135309	0.74968	0	0	Glycoside hydrolase family 28 protein/polygalacturonase family protein (AHRD V1 **-- Q1PF10_ARATH)%3B contains Interpro domain(s) IPR012334 Pectin lyase fold //	GO:0005975//	carbohydrate metabolic process//	biological_process//
XLOC_010679	Solyc03g062710.2	SL2.50ch03:31965802-31967408	-0.581351	0.643208	0.754653	Aldose 1-epimerase family protein expressed (AHRD V1 **-- Q10CW2_ORYSJ)%3B contains Interpro domain(s) IPR011013 Glycoside hydrolase-type carbohydrate-binding //	GO:0005975//	carbohydrate metabolic process//	biological_process//
XLOC_017945	Solyc06g068040.2	SL2.50ch06:42165923-42169071	0	-0.535982	0	Polygalacturonase (AHRD V1 ***- Q9M7D3_SOLLC)%3B contains Interpro domain(s) IPR000743 Glycoside hydrolase%2C family 28 //	GO:0005975//	carbohydrate metabolic process//	biological_process//
XLOC_016704	Solyc05g050130.2	SL2.50ch05:60108918-60110761	1.80317	0	0	Acidic chitinase (AHRD V1 **-- Q71HN4_FICAW)%3B contains Interpro domain(s) IPR001223 Glycoside hydrolase%2C family 18%2C catalytic domain //	GO:0005975//	carbohydrate metabolic process//	biological_process//
XLOC_033381	Solyc12g055840.1	SL2.50ch12:61841458-61842844	-0.739017	0	0	Glucan endo-1 3-beta-glucosidase 7 (AHRD V1 ***- B6T478_MAIZE)%3B contains Interpro domain(s) IPR000490 Glycoside hydrolase%2C family 17 //	GO:0005975//	carbohydrate metabolic process//	biological_process//
XLOC_024464	Solyc08g074390.2	SL2.50ch08:58503338-58505622	0	0	0.617077	Glucan endo-1 3-beta-glucosidase 6 (AHRD V1 ***- B6TW83_MAIZE)%3B contains Interpro domain(s) IPR013781 Glycoside hydrolase%2C subgroup%2C catalytic core //	GO:0005975//	carbohydrate metabolic process//	biological_process//
XLOC_020649	Solyc07g049370.2	SL2.50ch07:59643649-59646327	-1.9101	0	0	Glucan endo-1 3-beta-glucosidase A6 (AHRD V1 ***- B6TIF7_MAIZE)%3B contains Interpro domain(s) IPR000490 Glycoside hydrolase%2C family 17 //	GO:0005975//	carbohydrate metabolic process//	biological_process//
XLOC_010680	Solyc03g062720.2	SL2.50ch03:31967746-31969513	0	0.693674	1.29911	Galactose mutarotase-like (AHRD V1 **-- A2Q5N9_MEDTR)%3B contains Interpro domain(s) IPR011013 Glycoside hydrolase-type carbohydrate-binding //	GO:0005975//	carbohydrate metabolic process//	biological_process//
XLOC_029858	Solyc10g083290.1	SL2.50ch10:63110525-63115912	1.13821	-0.834823	0	Beta-fructofuranosidase insoluble isoenzyme 2 (AHRD V1 **-- B6U1H5_MAIZE)%3B contains Interpro domain(s) IPR018053 Glycoside hydrolase%2C family 32%2C active site IPR013148 Glycosyl hydrolases family 32%2C N-terminal IPR001362 Glycoside hydrolase%2C family 32 //	GO:0005975//	carbohydrate metabolic process//	biological_process//
XLOC_001040	Solyc01g007330.2	SL2.50ch01:1851937-1853783	-3.20952	0	-1.01999	Ribulose bisphosphate carboxylase large chain (AHRD V1 ***- RBL_SOLLC)%3B contains Interpro domain(s) IPR000685 Ribulose bisphosphate carboxylase%2C large subunit%2C C-terminal //	GO:0015977//	carbon fixation//	biological_process//
XLOC_002687	Solyc01g106360.2	SL2.50ch01:94290498-94298939	0	0	-0.514355	Glutamyl-tRNA(Gln) amidotransferase subunit A (AHRD V1 ***- C5FFK2_NANOT)%3B contains Interpro domain(s) IPR000120 Amidase signature enzyme //	GO:0016884//	carbon-nitrogen ligase activity, with glutamine as amido-N-donor//	molecular_function//
XLOC_031216	Solyc11g071550.1	SL2.50ch11:54980252-54985643	0	0	-1.00845	Glutamyl-tRNA(Gln) amidotransferase subunit A (AHRD V1 ***- Q81EC8_BACCR)%3B contains Interpro domain(s) IPR000120 Amidase signature enzyme //	GO:0016884//	carbon-nitrogen ligase activity, with glutamine as amido-N-donor//	molecular_function//
XLOC_002685	Solyc01g106340.2	SL2.50ch01:94270709-94278847	1.0427	0	0	Glutamyl-tRNA(Gln) amidotransferase subunit A (AHRD V1 ***- C5FFK2_NANOT)%3B contains Interpro domain(s) IPR000120 Amidase signature enzyme //	GO:0016884//	carbon-nitrogen ligase activity, with glutamine as amido-N-donor//	molecular_function//
XLOC_011263	Solyc03g112460.2	SL2.50ch03:62860195-62865443	0	0	1.03675	Alliinase (Fragment) (AHRD V1 ***- Q94EJ8_ALLFI)%3B contains Interpro domain(s) IPR006948 Allinase%2C C-terminal //	GO:0016846//	carbon-sulfur lyase activity//	molecular_function//
XLOC_018087	Solyc06g071640.2	SL2.50ch06:44120489-44127739	-1.45494	0	0	Alliinase (Fragment) (AHRD V1 ***- Q94EJ8_ALLFI)%3B contains Interpro domain(s) IPR006948 Allinase%2C C-terminal //	GO:0016846//	carbon-sulfur lyase activity//	molecular_function//
XLOC_025158	Solyc09g009830.2	SL2.50ch09:3322329-3331026	0.724784	-0.542796	0.811992	Carbonic anhydrase (Carbonate dehydratase) (AHRD V1 **** C1DTU5_SULAA)%3B contains Interpro domain(s) IPR018340 Carbonic anhydrase%2C CAH1-like //	GO:0004089//	carbonate dehydratase activity//	molecular_function//
XLOC_002125	Solyc01g094210.2	SL2.50ch01:85771570-85774040	0.950443	0	1.03856	Carbonyl reductase 3 (AHRD V1 **** B6TRS7_MAIZE)%3B contains Interpro domain(s) IPR002347 Glucose/ribitol dehydrogenase //	GO:0004090//	carbonyl reductase (NADPH) activity//	molecular_function//
XLOC_002126	Solyc01g094220.2	SL2.50ch01:85779406-85782185	0.688891	0	0	Carbonyl reductase 3 (AHRD V1 **** B6TRS7_MAIZE)%3B contains Interpro domain(s) IPR002347 Glucose/ribitol dehydrogenase //	GO:0004090//	carbonyl reductase (NADPH) activity//	molecular_function//
XLOC_013148	Solyc04g081290.2	SL2.50ch04:65331681-65334990	0.543909	0	0.884577	Lysine decarboxylase-like protein (AHRD V1 **-- B6T4M5_MAIZE)%3B contains Interpro domain(s) IPR005269 Conserved hypothetical protein CHP00730 //	GO:0016831//	carboxy-lyase activity//	molecular_function//
XLOC_026274	Solyc09g007830.2	SL2.50ch09:1356781-1361135	-1.58153	0	0	Cytokinin riboside 5%26apos%3B-monophosphate phosphoribohydrolase LOG (AHRD V1 **-- LOG_ORYSJ)%3B contains Interpro domain(s) IPR005269 Conserved hypothetical protein CHP00730 //	GO:0016831//	carboxy-lyase activity//	molecular_function//
XLOC_018267	Solyc06g075090.2	SL2.50ch06:46591621-46596343	0	0	0.61766	Lysine decarboxylase-like protein (AHRD V1 **-- B6TE71_MAIZE)%3B contains Interpro domain(s) IPR005269 Conserved hypothetical protein CHP00730 //	GO:0016831//	carboxy-lyase activity//	molecular_function//
XLOC_023112	Solyc08g066220.2	SL2.50ch08:54691595-54695325	-0.986947	-0.723798	-1.85924	Decarboxylase family protein (AHRD V1 *-*- A7GHE9_CLOBL)%3B contains Interpro domain(s) IPR002129 Pyridoxal phosphate-dependent decarboxylase //	GO:0019752//	carboxylic acid metabolic process//	biological_process//
XLOC_008643	Solyc03g007960.2	SL2.50ch03:2447871-2450289	1.59928	0	0	Beta-carotene hydroxylase 2//	GO:0010291//	carotene beta-ring hydroxylase activity//	molecular_function//
XLOC_019600	Solyc06g074240.1	SL2.50ch06:45898226-45899723	1.63962	0	0	Chromoplast-specific lycopene beta-cyclase//	GO:0016117//	carotenoid biosynthetic process//	biological_process//
XLOC_012301	Solyc04g040190.1	SL2.50ch04:11946694-11948646	0	0.640388	1.13314	Lycopene beta-cyclase 1//	GO:0016117//	carotenoid biosynthetic process//	biological_process//
XLOC_000812	Solyc00g156980.2	SL2.50ch00:17613646-17614823	0	0.608874	0	Choline dehydrogenase (AHRD V1 **-- A5L8M4_9GAMM)%3B contains Interpro domain(s) IPR008671 Lycopene beta and epsilon cyclase //	GO:0016117//	carotenoid biosynthetic process//	biological_process//
XLOC_028448	Solyc10g079480.1	SL2.50ch10:61024504-61026535	0	0	0.89557	Lycopene beta-cyclase 2//	GO:0016117//	carotenoid biosynthetic process//	biological_process//
XLOC_029824	Solyc10g081650.1	SL2.50ch10:62682289-62687661	0	0	0.519529	Carotenoid isomerase%2C chloroplastic//	GO:0046608//	carotenoid isomerase activity//	molecular_function//
XLOC_007825	Solyc02g082760.2	SL2.50ch02:46402604-46406986	0	0	1.37859	Catalase (AHRD V1 **** O24511_TOBAC)%3B contains Interpro domain(s) IPR018028 Catalase related subgroup //	GO:0004096//	catalase activity//	molecular_function//
XLOC_013203	Solyc04g082460.2	SL2.50ch04:66103490-66107965	-1.01366	0	0	Catalase (AHRD V1 **** Q8L7J7_CAPAN)%3B contains Interpro domain(s) IPR018028 Catalase related subgroup //	GO:0004096//	catalase activity//	molecular_function//
XLOC_012778	Solyc04g071700.2	SL2.50ch04:58675201-58678127	-0.579151	0	0	5-formyltetrahydrofolate cyclo-ligase family protein (AHRD V1 ***- D7KTW5_ARALY)%3B contains Interpro domain(s) IPR002698 5-formyltetrahydrofolate cyclo-ligase //	GO:0003824//	catalytic activity//	molecular_function//
XLOC_021671	Solyc07g039510.2	SL2.50ch07:47617720-47676596	-0.591719	0	0	Esterase/lipase/thioesterase (Fragment) (AHRD V1 **-- B3VW47_POPTN)%3B contains Interpro domain(s) IPR013744 Protein of unknown function DUF1749 //	GO:0003824//	catalytic activity//	molecular_function//
XLOC_004940	Solyc01g109720.2	SL2.50ch01:96604847-96606949	2.2007	0	0	Hydrolase-like (AHRD V1 ***- Q5VNP5_ORYSJ)%3B contains Interpro domain(s) IPR000639 Epoxide hydrolase-like //	GO:0003824//	catalytic activity//	molecular_function//
XLOC_024331	Solyc08g066670.2	SL2.50ch08:55499902-55502884	1.34704	0	0	Exostosin-like glycosyltransferase (AHRD V1 *--- A8JHN6_CHLRE)%3B contains Interpro domain(s) IPR004263 Exostosin-like //	GO:0003824//	catalytic activity//	molecular_function//
XLOC_004715	Solyc01g105020.2	SL2.50ch01:93319513-93326530	0	0	0.529185	Phosphatase PTC7 homolog (AHRD V1 *-*- C1BT38_9MAXI)%3B contains Interpro domain(s) IPR001932 Protein phosphatase 2C-related //	GO:0003824//	catalytic activity//	molecular_function//
XLOC_004517	Solyc01g099910.2	SL2.50ch01:90029881-90032830	0	0	-0.602945	Epoxide hydrolase (AHRD V1 ***- B3VMR4_NICBE)%3B contains Interpro domain(s) IPR000639 Epoxide hydrolase-like //	GO:0003824//	catalytic activity//	molecular_function//
XLOC_024693	Solyc08g079040.1	SL2.50ch08:62686813-62688559	0.591394	0	0	Galactosyltransferase-like protein (Fragment) (AHRD V1 **-- D8SQH4_SELML)%3B contains Interpro domain(s) IPR004263 Exostosin-like //	GO:0003824//	catalytic activity//	molecular_function//
XLOC_014359	Solyc04g079120.2	SL2.50ch04:63704846-63710679	1.49271	0	0	Protein phosphatase 2C containing protein expressed (AHRD V1 ***- Q94LH3_ORYSJ)%3B contains Interpro domain(s) IPR015655 Protein phosphatase 2C //	GO:0003824//	catalytic activity//	molecular_function//
XLOC_020586	Solyc07g044960.1	SL2.50ch07:58016930-58018505	1.9415	0	0	Galactosyltransferase-like protein (Fragment) (AHRD V1 **-- D8SQH4_SELML)%3B contains Interpro domain(s) IPR004263 Exostosin-like //	GO:0003824//	catalytic activity//	molecular_function//
XLOC_010037	Solyc03g121420.2	SL2.50ch03:69535460-69536922	1.63387	0	0	Phosphatase (AHRD V1 ***- D2V497_NAEGR)%3B contains Interpro domain(s) IPR016965 Pyridoxal phosphate phosphatase%2C PHOSPHO2 //	GO:0003824//	catalytic activity//	molecular_function//
XLOC_009061	Solyc03g063750.2	SL2.50ch03:35962985-35969055	0	0	-0.572887	Exostosin-like glycosyltransferase (AHRD V1 **-- A8J984_CHLRE)%3B contains Interpro domain(s) IPR004263 Exostosin-like //	GO:0003824//	catalytic activity//	molecular_function//
XLOC_002632	Solyc01g105280.2	SL2.50ch01:93507616-93512279	1.14949	0	0	Protein phosphatase 2C-like (AHRD V1 ***- A2Q6E4_MEDTR)%3B contains Interpro domain(s) IPR015655 Protein phosphatase 2C //	GO:0003824//	catalytic activity//	molecular_function//
XLOC_002329	Solyc01g098110.2	SL2.50ch01:88704351-88719672	0	0	0.870177	Hydrolase alpha/beta fold family protein (AHRD V1 **-- D7L9I6_ARALY)%3B contains Interpro domain(s) IPR007130 Diacylglycerol acyltransferase //	GO:0003824//	catalytic activity//	molecular_function//
XLOC_009692	Solyc03g114250.2	SL2.50ch03:64280851-64283088	0	0	0.58468	Phosphoglycerate mutase family protein (AHRD V1 **-- B6TTB7_MAIZE)%3B contains Interpro domain(s) IPR013078 Phosphoglycerate mutase //	GO:0003824//	catalytic activity//	molecular_function//
XLOC_001694	Solyc01g066870.2	SL2.50ch01:75091535-75095438	0	0	1.12393	Protein phosphatase 2C containing protein (AHRD V1 ***- B6T998_MAIZE)%3B contains Interpro domain(s) IPR015655 Protein phosphatase 2C //	GO:0003824//	catalytic activity//	molecular_function//
XLOC_018563	Solyc06g007610.2	SL2.50ch06:1605024-1606614	-4.80183	0	0	Early tobacco anther 1 (AHRD V1 ***- Q84XA0_TOBAC)//	GO:0003824//	catalytic activity//	molecular_function//
XLOC_014938	Solyc05g012350.2	SL2.50ch05:5613048-5616480	-1.72031	0	0	Hydrolase alpha/beta fold family protein (AHRD V1 ***- D7MJQ7_ARALY)%3B contains Interpro domain(s) IPR000639 Epoxide hydrolase-like //	GO:0003824//	catalytic activity//	molecular_function//
XLOC_004761	Solyc01g106060.2	SL2.50ch01:94042527-94045866	-1.0798	0	0	Glutamine amidotransferase class-I (AHRD V1 **-- A2Q1P2_MEDTR)%3B contains Interpro domain(s) IPR000991 Glutamine amidotransferase class-I%2C C-terminal //	GO:0003824//	catalytic activity//	molecular_function//
XLOC_033696	Solyc12g099430.1	SL2.50ch12:66583988-66587993	1.73153	0	1.18189	Epoxide hydrolase 1 (AHRD V1 ***- D8L7V7_PRUPE)%3B contains Interpro domain(s) IPR000639 Epoxide hydrolase-like //	GO:0003824//	catalytic activity//	molecular_function//
XLOC_020183	Solyc07g016040.1,Solyc07g016050.2,Solyc07g016080.2	SL2.50ch07:6202489-6261931	-1.14181	0	0	Decarboxylase (AHRD V1 ***- D7G8F2_ECTSI)%3B contains Interpro domain(s) IPR015421 Pyridoxal phosphate-dependent transferase%2C major region%2C subdomain 1 //Lysine decarboxylase (AHRD V1 **** Q8YMP6_ANASP)%3B contains Interpro domain(s) IPR000310 Orn/Lys/Arg decarboxylase%2C major region //Decarboxylase (AHRD V1 ***- D7G8F2_ECTSI)%3B contains Interpro domain(s) IPR000310 Orn/Lys/Arg decarboxylas…	GO:0003824//GO:0008923//GO:0003824//	catalytic activity//lysine decarboxylase activity//catalytic activity//	molecular_function//molecular_function//molecular_function//
XLOC_019238	Solyc06g064490.2,Solyc06g064500.2	SL2.50ch06:40154846-40162343	-1.12014	0	0	Exostosin family protein (AHRD V1 ***- D7LZA5_ARALY)%3B contains Interpro domain(s) IPR004263 Exostosin-like //O-methyltransferase (AHRD V1 **** A5HJZ9_VITVI)%3B contains Interpro domain(s) IPR016461 O-methyltransferase%2C COMT%2C eukaryota //	GO:0003824//GO:0030755//	catalytic activity//quercetin 3-O-methyltransferase activity//	molecular_function//molecular_function//
XLOC_028845	Solyc10g006800.2	SL2.50ch10:1240345-1246964	0.764204	0	0	Cyclic nucleotide gated channel (AHRD V1 **** A9CRE4_MALDO)%3B contains Interpro domain(s) IPR000595 Cyclic nucleotide-binding //	GO:0005261//	cation channel activity//	molecular_function//
XLOC_022330	Solyc07g065380.2	SL2.50ch07:67165015-67167433	0.985151	0	0.857904	Zinc transporter 2 (AHRD V1 **** B6UH65_MAIZE)%3B contains Interpro domain(s) IPR003689 Zinc/iron permease //	GO:0008324//	cation transmembrane transporter activity//	molecular_function//
XLOC_011938	Solyc04g007520.2	SL2.50ch04:1207150-1216447	0.904116	0	0	Phosphatidylserine synthase 2 (AHRD V1 ***- B6TFK2_MAIZE)%3B contains Interpro domain(s) IPR004277 Phosphatidyl serine synthase //	GO:0003882//	CDP-diacylglycerol-serine O-phosphatidyltransferase activity//	molecular_function//
XLOC_015969	Solyc05g008580.2	SL2.50ch05:2892917-2899489	1.09462	0	1.11938	Phosphatidylserine synthase 2 (AHRD V1 ***- B6TFK2_MAIZE)%3B contains Interpro domain(s) IPR004277 Phosphatidyl serine synthase //	GO:0003882//	CDP-diacylglycerol-serine O-phosphatidyltransferase activity//	molecular_function//
XLOC_014526	Solyc04g082410.2,Solyc04g082420.2	SL2.50ch04:66078366-66085144	0.987875	0	0	BTB/POZ domain-containing protein (AHRD V1 **-- D7LC69_ARALY)%3B contains Interpro domain(s) IPR013089 Kelch related //BTB/POZ domain-containing protein (AHRD V1 **-- D7LC69_ARALY)%3B contains Interpro domain(s) IPR013089 Kelch related //	GO:0007155//GO:0005515//	cell adhesion//protein binding//	biological_process//molecular_function//
XLOC_026383	Solyc09g010130.2	SL2.50ch09:3503322-3512040	0	0	-0.599927	Sorting nexin 1 (AHRD V1 ***- Q70YZ8_BRAOL)%3B contains Interpro domain(s) IPR015404 Vps5 C-terminal //	GO:0007154//	cell communication//	biological_process//
XLOC_028424	Solyc10g078920.1	SL2.50ch10:60569612-60571798	-1.19407	0	0	Thioredoxin-like 5 (AHRD V1 ***- A6N1I7_ORYSI)%3B contains Interpro domain(s) IPR013766 Thioredoxin domain //	GO:0045454//	cell redox homeostasis//	biological_process//
XLOC_009149	Solyc03g078380.1	SL2.50ch03:50772204-50772990	0.544577	0	0.587118	Glutaredoxin family protein (AHRD V1 **-- D7M5W6_ARALY)%3B contains Interpro domain(s) IPR012335 Thioredoxin fold //	GO:0045454//	cell redox homeostasis//	biological_process//
XLOC_023703	Solyc08g083270.1	SL2.50ch08:65775745-65778158	-1.37276	0	0	Glutaredoxin family protein (AHRD V1 **-- D7LYR1_ARALY)%3B contains Interpro domain(s) IPR012335 Thioredoxin fold //	GO:0045454//	cell redox homeostasis//	biological_process//
XLOC_024758	Solyc08g080720.2	SL2.50ch08:63934500-63935420	-0.761681	0	0	Selenoprotein H (AHRD V1 *-*- A8JGP7_CHLRE)%3B contains Interpro domain(s) IPR011893 SelT/selW/selH selenoprotein //	GO:0045454//	cell redox homeostasis//	biological_process//
XLOC_015889	Solyc05g006850.2	SL2.50ch05:1456062-1486270	1.41675	-0.645128	1.0057	Thioredoxin H (AHRD V1 ***- Q4U0W0_NICAL)%3B contains Interpro domain(s) IPR015467 Thioredoxin%2C core //	GO:0045454//	cell redox homeostasis//	biological_process//
XLOC_025157	Solyc09g009820.2	SL2.50ch09:3308056-3320761	0.516627	0	0.632929	Glutathione S-transferase domain protein (AHRD V1 *--- C6RLV9_ACIRA)%3B contains Interpro domain(s) IPR004045 Glutathione S-transferase%2C N-terminal //	GO:0045454//	cell redox homeostasis//	biological_process//
XLOC_023666	Solyc08g082590.2	SL2.50ch08:65320011-65322178	0	0	1.35143	Glutaredoxin family protein (AHRD V1 **-- D7KS91_ARALY)%3B contains Interpro domain(s) IPR012335 Thioredoxin fold //	GO:0045454//	cell redox homeostasis//	biological_process//
XLOC_025160	Solyc09g009860.1	SL2.50ch09:3350084-3351284	-2.10433	0	0	Glutaredoxin family protein (AHRD V1 **-- D7LWU7_ARALY)%3B contains Interpro domain(s) IPR012335 Thioredoxin fold //	GO:0045454//	cell redox homeostasis//	biological_process//
XLOC_011904	Solyc04g005810.2	SL2.50ch04:523130-523878	-1.88843	0	0	Thioredoxin H (AHRD V1 ***- Q4U0W0_NICAL)%3B contains Interpro domain(s) IPR015467 Thioredoxin%2C core //	GO:0045454//	cell redox homeostasis//	biological_process//
XLOC_031186	Solyc11g069940.1	SL2.50ch11:54539245-54539674	1.0868	0	0.765106	Glutaredoxin (AHRD V1 ***- B9H2P7_POPTR)%3B contains Interpro domain(s) IPR011905 Glutaredoxin-like%2C plant II //	GO:0045454//	cell redox homeostasis//	biological_process//
XLOC_017227	Solyc06g008760.1	SL2.50ch06:2680654-2680960	1.20216	0	0.891715	Glutaredoxin (AHRD V1 ***- B3F8F2_SOLTU)%3B contains Interpro domain(s) IPR011905 Glutaredoxin-like%2C plant II //	GO:0045454//	cell redox homeostasis//	biological_process//
XLOC_003126	Solyc01g008250.2	SL2.50ch01:2375076-2377870	0	0	0.908369	Thioredoxin X (AHRD V1 ***- B6T9S0_MAIZE)%3B contains Interpro domain(s) IPR015467 Thioredoxin%2C core //	GO:0045454//	cell redox homeostasis//	biological_process//
XLOC_031377	Solyc11g006430.1	SL2.50ch11:1136220-1137306	-1.66195	0	0	Glutaredoxin family protein (AHRD V1 *--- D7LZQ8_ARALY)%3B contains Interpro domain(s) IPR012335 Thioredoxin fold //	GO:0045454//	cell redox homeostasis//	biological_process//
XLOC_024258	Solyc08g062970.1	SL2.50ch08:52455099-52455519	0	-0.715947	0	Glutaredoxin (AHRD V1 ***- B9H2P7_POPTR)%3B contains Interpro domain(s) IPR011905 Glutaredoxin-like%2C plant II //	GO:0045454//	cell redox homeostasis//	biological_process//
XLOC_001157	Solyc01g009900.2	SL2.50ch01:4462530-4463001	-2.77796	0	0	Glutaredoxin (AHRD V1 ***- B9GF65_POPTR)%3B contains Interpro domain(s) IPR011905 Glutaredoxin-like%2C plant II //	GO:0045454//	cell redox homeostasis//	biological_process//
XLOC_011600	Solyc03g119550.1	SL2.50ch03:68124581-68126335	-1.28268	0	0	LysM-domain GPI-anchored protein (AHRD V1 ***- Q4VVD8_ORYSJ)%3B contains Interpro domain(s) IPR002482 Peptidoglycan-binding Lysin subgroup //	GO:0016998//	cell wall macromolecule catabolic process//	biological_process//
XLOC_002380	Solyc01g099130.2	SL2.50ch01:89446314-89449257	0	0	0.870424	LysM domain containing protein (AHRD V1 ***- B6TTS5_MAIZE)%3B contains Interpro domain(s) IPR018392 Peptidoglycan-binding lysin domain //	GO:0016998//	cell wall macromolecule catabolic process//	biological_process//
XLOC_002961	Solyc01g112080.2	SL2.50ch01:98190535-98192257	-0.525182	0	0	LysM-domain GPI-anchored protein (AHRD V1 **-- Q4VVD8_ORYSJ)%3B contains Interpro domain(s) IPR002482 Peptidoglycan-binding Lysin subgroup //	GO:0016998//	cell wall macromolecule catabolic process//	biological_process//
XLOC_025946	Solyc09g083200.2	SL2.50ch09:68874801-68877251	2.01218	0	0	Nod factor receptor protein (Fragment) (AHRD V1 ***- B6ZN07_GLYSO)%3B contains Interpro domain(s) IPR002482 Peptidoglycan-binding Lysin subgroup //	GO:0016998//	cell wall macromolecule catabolic process//	biological_process//
XLOC_030739	Solyc11g031970.1	SL2.50ch11:24278076-24281922	0	0	1.01869	Unknown Protein (AHRD V1)%3B contains Interpro domain(s) IPR002482 Peptidoglycan-binding Lysin subgroup //	GO:0016998//	cell wall macromolecule catabolic process//	biological_process//
XLOC_029562	Solyc10g055780.1,Solyc10g055790.1	SL2.50ch10:57407425-57408625	-2.10112	0	0	Chitinase (AHRD V1 ***- B9VRK7_CAPAN)%3B contains Interpro domain(s) IPR000726 Glycoside hydrolase%2C family 19%2C catalytic //Chitinase (Fragment) (AHRD V1 --*- Q38777_ALLSA)%3B contains Interpro domain(s) IPR001002 Chitin-binding%2C type 1 //	GO:0016998//GO:0008061//	cell wall macromolecule catabolic process//chitin binding//	biological_process//molecular_function//
XLOC_025865	Solyc09g075350.2	SL2.50ch09:67067611-67072229	-1.61678	0	0	Pectinesterase (AHRD V1 ***- B9SAU4_RICCO)%3B contains Interpro domain(s) IPR000070 Pectinesterase%2C catalytic //	GO:0005618//	cell wall//	cellular_component//
XLOC_006042	Solyc02g080220.2	SL2.50ch02:44487427-44499450	-1.49532	0	0	Pectinesterase (AHRD V1 ***- B9RXQ4_RICCO)%3B contains Interpro domain(s) IPR000070 Pectinesterase%2C catalytic //	GO:0005618//	cell wall//	cellular_component//
XLOC_011746	Solyc03g123630.2	SL2.50ch03:70425058-70428336	0	0	-0.719386	Pectinesterase (AHRD V1 ***- Q564D7_SOLLC)%3B contains Interpro domain(s) IPR000070 Pectinesterase%2C catalytic //	GO:0005618//	cell wall//	cellular_component//
XLOC_016683	Solyc05g047590.2	SL2.50ch05:59092485-59094993	1.11207	-0.947124	0	Pectinesterase (AHRD V1 ***- C0SPH5_PRUPE)%3B contains Interpro domain(s) IPR000070 Pectinesterase%2C catalytic //	GO:0005618//	cell wall//	cellular_component//
XLOC_010902	Solyc03g083360.2	SL2.50ch03:53186755-53190323	0.823389	0	0	Pectinesterase (AHRD V1 ***- B9IDR8_POPTR)%3B contains Interpro domain(s) IPR000070 Pectinesterase%2C catalytic //	GO:0005618//	cell wall//	cellular_component//
XLOC_031337	Solyc11g005770.1	SL2.50ch11:605005-607249	-1.04977	0	-0.690794	Pectinesterase family protein (AHRD V1 ***- D7MRW1_ARALY)%3B contains Interpro domain(s) IPR000070 Pectinesterase%2C catalytic //	GO:0005618//	cell wall//	cellular_component//
XLOC_020209	Solyc07g017600.2	SL2.50ch07:7622109-7627390	0.891282	0	0	Pectinesterase (AHRD V1 ***- A9P7W7_POPTR)%3B contains Interpro domain(s) IPR000070 Pectinesterase%2C catalytic //	GO:0005618//	cell wall//	cellular_component//
XLOC_033875	Solyc12g008530.1	SL2.50ch12:1935571-1941362	-1.95055	0	0	Pectinesterase (AHRD V1 ***- B9RKG6_RICCO)%3B contains Interpro domain(s) IPR000070 Pectinesterase%2C catalytic //	GO:0005618//	cell wall//	cellular_component//
XLOC_011745	Solyc03g123620.2	SL2.50ch03:70419508-70422663	1.58946	0.691795	-0.660937	Pectinesterase (AHRD V1 ***- B9GXZ7_POPTR)%3B contains Interpro domain(s) IPR000070 Pectinesterase%2C catalytic //	GO:0005618//	cell wall//	cellular_component//
XLOC_030138	Solyc11g005620.1	SL2.50ch11:478040-481549	-0.633845	0	0	Acetylglutamate kinase-like protein (AHRD V1 ***- Q949B4_ORYSA)%3B contains Interpro domain(s) IPR011148 N-acetylglutamate kinase //	GO:0008652//	cellular amino acid biosynthetic process//	biological_process//
XLOC_023876	Solyc08g008530.1	SL2.50ch08:2925474-2927226	-0.752721	-0.598453	-0.960871	Aldolase (AHRD V1 ***- D7JQJ4_ECOLX)%3B contains Interpro domain(s) IPR005000 HpcH/HpaI aldolase //	GO:0006725//	cellular aromatic compound metabolic process//	biological_process//
XLOC_004167	Solyc01g090180.2	SL2.50ch01:83809262-83810364	-1.9704	0	-1.01741	Extradiol ring-cleavage dioxygenase class III protein subunit B (AHRD V1 ***- B8GF38_METPE)%3B contains Interpro domain(s) IPR014436 Extradiol aromatic ring-opening dioxygenase%2C DODA type //	GO:0006725//	cellular aromatic compound metabolic process//	biological_process//
XLOC_024569	Solyc08g076450.2	SL2.50ch08:60455719-60460642	0	0	0.576248	3-beta hydroxysteroid dehydrogenase/isomerase family protein (AHRD V1 **-- B6TV09_MAIZE)%3B contains Interpro domain(s) IPR016040 NAD(P)-binding domain //	GO:0044237//	cellular metabolic process//	biological_process//
XLOC_027738	Solyc10g009530.2	SL2.50ch10:3664503-3672537	-1.85472	0	0	Dihydroflavonol 4-reductase C (AHRD V1 ***- A9YEV9_CONAR)%3B contains Interpro domain(s) IPR016040 NAD(P)-binding domain //	GO:0044237//	cellular metabolic process//	biological_process//
XLOC_004609	Solyc01g102730.2	SL2.50ch01:91457311-91462418	-0.676633	0	0	Cinnamoyl-CoA reductase family (AHRD V1 ***- D7LQ28_ARALY)%3B contains Interpro domain(s) IPR016040 NAD(P)-binding domain //	GO:0044237//	cellular metabolic process//	biological_process//
XLOC_002084	Solyc01g091200.2	SL2.50ch01:84887845-84889721	0	0.562402	0.502129	NAD dependent epimerase/dehydratase family protein expressed (AHRD V1 ***- Q2MJA7_ORYSJ)%3B contains Interpro domain(s) IPR016040 NAD(P)-binding domain //	GO:0044237//	cellular metabolic process//	biological_process//
XLOC_031051	Solyc11g066150.1	SL2.50ch11:51848577-51852946	1.07897	0	0	Bifunctional polymyxin resistance protein ArnA (AHRD V1 **-- ARNA_AERHH)%3B contains Interpro domain(s) IPR016040 NAD(P)-binding domain //	GO:0044237//	cellular metabolic process//	biological_process//
XLOC_023774	Solyc08g006510.2	SL2.50ch08:1108335-1124190	0	0	0.666072	NAD dependent epimerase/dehydratase family protein (AHRD V1 **-- B6TVJ7_MAIZE)%3B contains Interpro domain(s) IPR016040 NAD(P)-binding domain //	GO:0044237//	cellular metabolic process//	biological_process//
XLOC_023550	Solyc08g080140.2	SL2.50ch08:63478753-63480888	0	0	-0.67374	dTDP-4-dehydrorhamnose reductase (AHRD V1 **-- B6STR1_MAIZE)%3B contains Interpro domain(s) IPR016040 NAD(P)-binding domain //	GO:0044237//	cellular metabolic process//	biological_process//
XLOC_029985	Solyc10g085920.1	SL2.50ch10:64934726-64939999	0.523452	0	0	Bifunctional polymyxin resistance protein ArnA (AHRD V1 **-- ARNA_KLEP3)%3B contains Interpro domain(s) IPR016040 NAD(P)-binding domain //	GO:0044237//	cellular metabolic process//	biological_process//
XLOC_003871	Solyc01g068080.2	SL2.50ch01:77121170-77124462	-1.28261	0	-0.712309	Dihydroflavonol 4-reductase family (AHRD V1 ***- D7MD06_ARALY)%3B contains Interpro domain(s) IPR016040 NAD(P)-binding domain //	GO:0044237//	cellular metabolic process//	biological_process//
XLOC_018459	Solyc06g084260.2	SL2.50ch06:49457995-49463738	-0.528269	0	0	Chalcone isomerase (AHRD V1 ***- B6TFR7_MAIZE)%3B contains Interpro domain(s) IPR003466 Chalcone isomerase%2C subgroup //	GO:0042398//	cellular modified amino acid biosynthetic process//	biological_process//
XLOC_018542	Solyc06g007320.2	SL2.50ch06:1338606-1348762	0.614035	0	0	Ubiquitin-activating enzyme E1 (AHRD V1 ***- B9SKU8_RICCO)%3B contains Interpro domain(s) IPR018075 Ubiquitin-activating enzyme%2C E1 //	GO:0006464//	cellular protein modification process//	biological_process//
XLOC_031223	Solyc11g071640.1	SL2.50ch11:55056616-55061358	-1.4115	0	0	Beta-D-glucosidase (AHRD V1 ***- O82074_TROMA)%3B contains Interpro domain(s) IPR001764 Glycoside hydrolase%2C family 3%2C N-terminal //	GO:0008810//	cellulase activity//	molecular_function//
XLOC_023699	Solyc08g083210.2	SL2.50ch08:65745731-65747828	-1.81212	0	0	Endoglucanase 1 (AHRD V1 ***- B6U0P7_MAIZE)%3B contains Interpro domain(s) IPR001701 Glycoside hydrolase%2C family 9 //	GO:0008810//	cellulase activity//	molecular_function//
XLOC_025866	Solyc09g075360.2	SL2.50ch09:67086864-67090300	-2.60089	0	0	Endoglucanase 1 (AHRD V1 ***- B6U0P7_MAIZE)%3B contains Interpro domain(s) IPR008928 Six-hairpin glycosidase-like IPR012341 Six-hairpin glycosidase IPR018221 Glycoside hydrolase%2C family 9%2C active site IPR001701 Glycoside hydrolase%2C family 9 //	GO:0008810//	cellulase activity//	molecular_function//
XLOC_002883	Solyc01g110340.2	SL2.50ch01:97070243-97076388	-0.674494	0	-0.692638	Endoglucanase 1 (AHRD V1 ***- B6U0P7_MAIZE)%3B contains Interpro domain(s) IPR001701 Glycoside hydrolase%2C family 9 //	GO:0008810//	cellulase activity//	molecular_function//
XLOC_034625	Solyc12g055970.1,Solyc12g055980.1	SL2.50ch12:61951742-61956091	0	0	0.779698	Endoglucanase 1 (AHRD V1 ***- B6U0J0_MAIZE)%3B contains Interpro domain(s) IPR001701 Glycoside hydrolase%2C family 9 //Endoglucanase 1 (AHRD V1 ***- B6U0J0_MAIZE)%3B contains Interpro domain(s) IPR001701 Glycoside hydrolase%2C family 9 //	GO:0008810//GO:0005975//	cellulase activity//carbohydrate metabolic process//	molecular_function//biological_process//
XLOC_016096	Solyc05g012070.2	SL2.50ch05:5295088-5298245	0	0	-0.524455	Alpha-1 4-glucan-protein synthase (AHRD V1 **-* B9RLK7_RICCO)%3B contains Interpro domain(s) IPR004901 Alpha-1%2C4-glucan-protein synthase%2C UDP-forming //	GO:0016760//	cellulose synthase (UDP-forming) activity//	molecular_function//
XLOC_011373	Solyc03g114860.2	SL2.50ch03:64749698-64751416	0.941041	0.748319	0	Alpha-1 4-glucan-protein synthase (AHRD V1 **-* B9RLK7_RICCO)%3B contains Interpro domain(s) IPR004901 Alpha-1%2C4-glucan-protein synthase%2C UDP-forming //	GO:0016760//	cellulose synthase (UDP-forming) activity//	molecular_function//
XLOC_006489	Solyc02g089170.2	SL2.50ch02:51051440-51053040	-0.814341	0	0	Alpha-1 4-glucan-protein synthase (AHRD V1 **-* B9RLK7_RICCO)%3B contains Interpro domain(s) IPR004901 Alpha-1%2C4-glucan-protein synthase%2C UDP-forming //	GO:0016760//	cellulose synthase (UDP-forming) activity//	molecular_function//
XLOC_023672	Solyc08g082670.2	SL2.50ch08:65381361-65386364	1.24733	0	1.18172	Cellulose synthase (AHRD V1 **** B9IMB3_POPTR)%3B contains Interpro domain(s) IPR005150 Cellulose synthase //	GO:0016759//	cellulose synthase activity//	molecular_function//
XLOC_012959	Solyc04g077470.2	SL2.50ch04:62384499-62387723	1.2067	0	0	Cellulose synthase-like C1-2 glycosyltransferase family 2 protein (AHRD V1 **** D8T077_SELML)%3B contains Interpro domain(s) IPR001173 Glycosyl transferase%2C family 2 //	GO:0016759//	cellulose synthase activity//	molecular_function//
XLOC_022476	Solyc08g005280.1	SL2.50ch08:210632-215145	-1.28249	0	0	Cellulose synthase-like protein (AHRD V1 **** B9IPJ4_POPTR)%3B contains Interpro domain(s) IPR005150 Cellulose synthase //	GO:0016759//	cellulose synthase activity//	molecular_function//
XLOC_011073	Solyc03g097050.2	SL2.50ch03:59400620-59406499	3.48052	0	-0.618292	Cellulose synthase-like protein (AHRD V1 **** B9IPJ4_POPTR)%3B contains Interpro domain(s) IPR005150 Cellulose synthase //	GO:0016759//	cellulose synthase activity//	molecular_function//
XLOC_023670	Solyc08g082640.2	SL2.50ch08:65370638-65375440	2.81138	0	2.80626	Cellulose synthase (AHRD V1 **** B9IMB3_POPTR)%3B contains Interpro domain(s) IPR005150 Cellulose synthase //	GO:0016759//	cellulose synthase activity//	molecular_function//
XLOC_025875	Solyc09g075550.2	SL2.50ch09:67240641-67245480	-0.949899	0.71393	0	Cellulose synthase-like D6 (AHRD V1 **** Q09HT5_PHYPA)%3B contains Interpro domain(s) IPR005150 Cellulose synthase //	GO:0016759//	cellulose synthase activity//	molecular_function//
XLOC_021914	Solyc07g051820.2	SL2.50ch07:60308147-60321139	1.99249	0	1.86943	Cellulose synthase (AHRD V1 **** Q2HT12_MEDTR)%3B contains Interpro domain(s) IPR005150 Cellulose synthase //	GO:0016759//	cellulose synthase activity//	molecular_function//
XLOC_019978	Solyc07g005840.2	SL2.50ch07:667373-673097	-0.730285	0	0	Cellulose synthase 3 (AHRD V1 **** Q2IB41_EUCGR)%3B contains Interpro domain(s) IPR005150 Cellulose synthase //	GO:0016759//	cellulose synthase activity//	molecular_function//
XLOC_008166	Solyc02g089640.2	SL2.50ch02:51391403-51394669	1.51872	0	0	Cellulose synthase-like C1-2 glycosyltransferase family 2 protein (AHRD V1 **** D8T077_SELML)//	GO:0016759//	cellulose synthase activity//	molecular_function//
XLOC_005852	Solyc02g072240.2	SL2.50ch02:41549359-41554023	-0.797552	0	0	Cellulose synthase (AHRD V1 **** Q6J8W9_9ROSI)%3B contains Interpro domain(s) IPR005150 Cellulose synthase //	GO:0016759//	cellulose synthase activity//	molecular_function//
XLOC_027072	Solyc09g072820.2	SL2.50ch09:65509993-65520299	-0.642769	0	0	Cellulose synthase (AHRD V1 **** B8XPP6_9ROSI)%3B contains Interpro domain(s) IPR005150 Cellulose synthase //	GO:0016759//	cellulose synthase activity//	molecular_function//
XLOC_022343	Solyc07g065660.2	SL2.50ch07:67345820-67358910	0	0	1.23855	Cellulose synthase (AHRD V1 **** Q2HT17_MEDTR)%3B contains Interpro domain(s) IPR005150 Cellulose synthase //	GO:0016759//	cellulose synthase activity//	molecular_function//
XLOC_020491	Solyc07g042250.2	SL2.50ch07:55361116-55363767	-0.772035	0	0	chaperonin (AHRD V1 *-*- B4WMS9_9SYNE)%3B contains Interpro domain(s) IPR017416 Chaperonin 21%2C chloroplast IPR018369 Chaperonin Cpn10%2C conserved site //	GO:0051087//	chaperone binding//	molecular_function//
XLOC_021328	Solyc07g008800.2	SL2.50ch07:3769449-3771210	-0.867837	0	-0.541043	chaperonin (AHRD V1 ***- O24186_ORYSA)%3B contains Interpro domain(s) IPR001476 Chaperonin Cpn10 //	GO:0051087//	chaperone binding//	molecular_function//
XLOC_029049	Solyc10g017970.1	SL2.50ch10:6248915-6249098	0	inf	0	Chitinase (AHRD V1 ***- Q9SQL3_POAPR)%3B contains Interpro domain(s) IPR001002 Chitin-binding%2C type 1 //	GO:0008061//	chitin binding//	molecular_function//
XLOC_020162	Solyc07g009510.1	SL2.50ch07:4622505-4622769	inf	0	0	Chitinase (AHRD V1 ***- P93327_MEDTR)%3B contains Interpro domain(s) IPR001002 Chitin-binding%2C type 1 //	GO:0008061//	chitin binding//	molecular_function//
XLOC_020161	Solyc07g009500.1	SL2.50ch07:4618502-4618766	inf	0	0	Chitinase (AHRD V1 ***- P93327_MEDTR)%3B contains Interpro domain(s) IPR001002 Chitin-binding%2C type 1 //	GO:0008061//	chitin binding//	molecular_function//
XLOC_004834	Solyc01g107660.2	SL2.50ch01:95131896-95134253	0	0	0.593192	Stress enhanced protein 1 (Fragment) (AHRD V1 *-*- C6JT32_9MYRT)//	GO:0016168//	chlorophyll binding//	molecular_function//
XLOC_027220	Solyc09g082690.2	SL2.50ch09:68399648-68411508	0	0	0.685126	Early light-induced protein 7 (AHRD V1 ***- B2BJD6_RHOCT)//	GO:0016168//	chlorophyll binding//	molecular_function//
XLOC_002621	Solyc01g105050.2	SL2.50ch01:93332720-93333889	-0.990589	0	0	Chlorophyll a-b binding protein%2C chloroplastic (AHRD V1 **** CB12_PETHY)%3B contains Interpro domain(s) IPR001344 Chlorophyll A-B binding protein //	GO:0016168//	chlorophyll binding//	molecular_function//
XLOC_005795	Solyc02g071010.1	SL2.50ch02:40522220-40523018	-1.24973	0	0	Chlorophyll a/b binding protein (AHRD V1 **** Q41422_SOLTU)%3B contains Interpro domain(s) IPR001344 Chlorophyll A-B binding protein //	GO:0016168//	chlorophyll binding//	molecular_function//
XLOC_020310	Solyc07g024000.2	SL2.50ch07:23795953-23800624	0	0.583225	0.516374	Dehydrogenase/ reductase 3 (AHRD V1 *--* Q3INM6_NATPD)%3B contains Interpro domain(s) IPR002347 Glucose/ribitol dehydrogenase //	GO:0034256//	chlorophyll(ide) b reductase activity//	molecular_function//
XLOC_025740	Solyc09g065620.2	SL2.50ch09:63784362-63786314	1.30572	0	0	Chlorophyllase 1 (AHRD V1 **** C1JZ61_9ROSI)%3B contains Interpro domain(s) IPR010821 Chlorophyllase //	GO:0047746//	chlorophyllase activity//	molecular_function//
XLOC_019117	Solyc06g060310.2	SL2.50ch06:38283005-38287572	0	0	0.545475	Chlorophyllide a oxygenase (AHRD V1 **** B6TZB6_MAIZE)%3B contains Interpro domain(s) IPR013626 Pheophorbide a oxygenase //	GO:0010277//	chlorophyllide a oxygenase [overall] activity//	molecular_function//
XLOC_027291	Solyc09g090330.2	SL2.50ch09:69841026-69845703	0	0	0.701659	Harpin binding protein 1 (AHRD V1 **-- Q5QJB4_SOLLC)%3B contains Interpro domain(s) IPR006843 PAP fibrillin //	GO:0009507//	chloroplast//	cellular_component//
XLOC_027825	Solyc10g018590.1	SL2.50ch10:8806917-8813989	0	0	0.758332	Os04g0551700 protein (Fragment) (AHRD V1 ***- Q0JB74_ORYSJ)%3B contains Interpro domain(s) IPR006843 PAP fibrillin //	GO:0009507//	chloroplast//	cellular_component//
XLOC_000998	Solyc01g006330.2	SL2.50ch01:909542-913984	0	0	0.978565	PAP fibrillin family protein (AHRD V1 *-*- B7KDB3_CYAP7)%3B contains Interpro domain(s) IPR006843 PAP fibrillin //	GO:0009507//	chloroplast//	cellular_component//
XLOC_024413	Solyc08g068590.2	SL2.50ch08:57724550-57730467	0	0	0.681302	PAP fibrillin family protein (AHRD V1 ***- B5W0K3_SPIMA)%3B contains Interpro domain(s) IPR006843 PAP fibrillin //	GO:0009507//	chloroplast//	cellular_component//
XLOC_020607	Solyc07g045310.2	SL2.50ch07:58405397-58415792	-0.516458	0	0	SET domain-containing protein (AHRD V1 ***- D7L6N3_ARALY)%3B contains Interpro domain(s) IPR011192 Rubisco methyltransferase //	GO:0009507//	chloroplast//	cellular_component//
XLOC_016147	Solyc05g013150.2	SL2.50ch05:6230025-6238703	0	0	0.925794	Set domain protein (AHRD V1 ***- C1EFC8_9CHLO)%3B contains Interpro domain(s) IPR011192 Rubisco methyltransferase //	GO:0009507//	chloroplast//	cellular_component//
XLOC_018233	Solyc06g074590.1	SL2.50ch06:46143833-46144245	-3.21479	0	-1.28154	Ycf2 (AHRD V1 *-*- A6YA57_9MAGN)%3B contains Interpro domain(s) IPR008543 Chloroplast Ycf2 //	GO:0009507//	chloroplast//	cellular_component//
XLOC_023761	Solyc08g006160.2	SL2.50ch08:880633-883706	0	0	0.612833	Plastid fibrillin 3 (Fragment) (AHRD V1 **-- A6XBK9_COFCA)%3B contains Interpro domain(s) IPR006843 PAP fibrillin //	GO:0009507//	chloroplast//	cellular_component//
XLOC_031318	Solyc11g005340.1	SL2.50ch11:269527-272730	0.833486	1.73513	2.5392	PAP fibrillin family protein (AHRD V1 **-- B5W0K3_SPIMA)%3B contains Interpro domain(s) IPR006843 PAP fibrillin //	GO:0009507//	chloroplast//	cellular_component//
XLOC_004677	Solyc01g104320.2	SL2.50ch01:92731068-92735050	1.83402	0	1.04234	PAP fibrillin (AHRD V1 ***- A2Q498_MEDTR)%3B contains Interpro domain(s) IPR006843 PAP fibrillin //	GO:0009507//	chloroplast//	cellular_component//
XLOC_017011	Solyc05g056470.1	SL2.50ch05:65747087-65748932	-1.16099	1.20798	0.802703	ABC transporter G family member 5 (AHRD V1 **** AB5G_ARATH)%3B contains Interpro domain(s) IPR013525 ABC-2 type transporter //	GO:0017127//	cholesterol transporter activity//	molecular_function//
XLOC_012795	Solyc04g072020.2	SL2.50ch04:59092942-59096745	0.531172	0	0	Choline kinase (AHRD V1 **** Q9AVR9_PEA)%3B contains Interpro domain(s) IPR002573 Choline/ethanolamine kinase //	GO:0004103//	choline kinase activity//	molecular_function//
XLOC_025223	Solyc09g011160.2	SL2.50ch09:4509137-4514771	0	0	0.973317	Regulator of chromosome condensation RCC1 (AHRD V1 *--- B8FLG8_DESAA)%3B contains Interpro domain(s) IPR009091 Regulator of chromosome condensation/beta-lactamase-inhibitor protein II //	GO:0003682//	chromatin binding//	molecular_function//
XLOC_002259	Solyc01g096900.2	SL2.50ch01:87888094-87909470	-0.683017	0	0	DNA gyrase subunit A family protein (AHRD V1 ***- D7L923_ARALY)%3B contains Interpro domain(s) IPR005743 DNA gyrase%2C subunit A //	GO:0005694//	chromosome//	cellular_component//
XLOC_009298	Solyc03g093250.1,Solyc03g093260.2	SL2.50ch03:54435741-54450001	-0.892224	0	0	Structural maintenance of chromosomes 2 (AHRD V1 **-- Q52KE9_MOUSE)%3B contains Interpro domain(s) IPR003395 RecF/RecN/SMC protein%2C N-terminal //Structural maintenance of chromosomes 2 (AHRD V1 **-- Q52KE9_MOUSE)%3B contains Interpro domain(s) IPR003395 RecF/RecN/SMC protein%2C N-terminal //	GO:0005694//GO:0016887//	chromosome//ATPase activity//	cellular_component//molecular_function//
XLOC_011467	Solyc03g116910.2	SL2.50ch03:66177316-66180108	0	0	0.678542	Cinnamoyl-CoA reductase (AHRD V1 **** Q4U1I4_SOLLC)%3B contains Interpro domain(s) IPR016040 NAD(P)-binding domain //	GO:0016621//	cinnamoyl-CoA reductase activity//	molecular_function//
XLOC_029055	Solyc10g018140.1	SL2.50ch10:6769186-6773138	1.06779	0	1.62901	Dihydroflavonol 4-reductase (AHRD V1 **** Q6R130_CITSI)%3B contains Interpro domain(s) IPR016040 NAD(P)-binding domain //	GO:0016621//	cinnamoyl-CoA reductase activity//	molecular_function//
XLOC_007374	Solyc02g069250.2	SL2.50ch02:39188283-39190211	1.84224	0	0	Cinnamyl alcohol dehydrogenase-like protein (AHRD V1 **** A9PHZ1_POPTR)%3B contains Interpro domain(s) IPR002085 Alcohol dehydrogenase superfamily%2C zinc-containing //	GO:0045551//	cinnamyl-alcohol dehydrogenase activity//	molecular_function//
XLOC_030362	Solyc11g011330.1	SL2.50ch11:4375431-4377584	1.74402	0	0	Cinnamyl alcohol dehydrogenase (AHRD V1 **** D1FWZ8_SOYBN)%3B contains Interpro domain(s) IPR002085 Alcohol dehydrogenase superfamily%2C zinc-containing //	GO:0045551//	cinnamyl-alcohol dehydrogenase activity//	molecular_function//
XLOC_002749	Solyc01g107590.2	SL2.50ch01:95091178-95094937	0	0	0.634439	Cinnamyl alcohol dehydrogenase (AHRD V1 **** C1IC55_GOSHI)%3B contains Interpro domain(s) IPR002085 Alcohol dehydrogenase superfamily%2C zinc-containing //	GO:0045551//	cinnamyl-alcohol dehydrogenase activity//	molecular_function//
XLOC_025292	Solyc09g014450.2	SL2.50ch09:6067467-6071263	0.68088	-0.598865	0	Unknown Protein (AHRD V1)%3B contains Interpro domain(s) IPR000996 Clathrin light chain //	GO:0030132//	clathrin coat of coated pit//	cellular_component//
XLOC_032549	Solyc12g006000.1	SL2.50ch12:616050-618237	1.54949	0	1.41059	Clathrin assembly protein-like (AHRD V1 *-*- Q8LJJ6_ORYSJ)%3B contains Interpro domain(s) IPR011417 ANTH //	GO:0030118//	clathrin coat//	cellular_component//
XLOC_001836	Solyc01g080300.2,Solyc01g080310.2	SL2.50ch01:79537152-79552184	0	0	0.710399	Cobalt transport protein (AHRD V1 ***- Q4C386_CROWT)%3B contains Interpro domain(s) IPR003339 Cobalt transport protein //Pentatricopeptide repeat-containing protein (AHRD V1 ***- D7LYJ1_ARALY)%3B contains Interpro domain(s) IPR002885 Pentatricopeptide repeat //	GO:0009236//no GOid	cobalamin biosynthetic process//no GOterm//	biological_process//no GO_branch//
XLOC_013234	Solyc04g005080.2,Solyc04g005090.2	SL2.50ch04:64900-77723	0	0	0.604648	Pyruvate dehydrogenase E1 component alpha subunit (AHRD V1 ***- B6TMS5_MAIZE)%3B contains Interpro domain(s) IPR017597 Pyruvate dehydrogenase (acetyl-transferring) E1 component%2C alpha subunit%2C subgroup y //Uncharacterized conserved membrane protein (AHRD V1 **-- A5GTC4_SYNR3)//	GO:0050897//no GOid	cobalt ion binding//no GOterm//	molecular_function//no GO_branch//
XLOC_033395	Solyc12g056120.1	SL2.50ch12:62087150-62088641	-0.527156	0	-0.656444	6-phosphogluconate dehydrogenase decarboxylating (AHRD V1 ***- Q9FFR3_ARATH)%3B contains Interpro domain(s) IPR006113 6-phosphogluconate dehydrogenase%2C decarboxylating //	GO:0050662//	coenzyme binding//	molecular_function//
XLOC_007276	Solyc02g067480.2	SL2.50ch02:37671071-37679680	-1.45845	0	0	Pyridine nucleotide-disulfide oxidoreductase (AHRD V1 **-* D3I8P7_9BACT)%3B contains Interpro domain(s) IPR004792 HI0933-like protein //	GO:0050662//	coenzyme binding//	molecular_function//
XLOC_009898	Solyc03g118640.2	SL2.50ch03:67501894-67521647	-0.614223	0	0	D-tagatose-1%2C6-bisphosphate aldolase subunit gatY (AHRD V1 *-*- GATY_ECOLX)%3B contains Interpro domain(s) IPR015815 3-hydroxyacid dehydrogenase/reductase //	GO:0050662//	coenzyme binding//	molecular_function//
XLOC_002388	Solyc01g099240.2	SL2.50ch01:89536290-89537541	-0.524972	0	0	3-hydroxyisobutyrate dehydrogenase (AHRD V1 ***- A3ZMK4_9PLAN)%3B contains Interpro domain(s) IPR015815 3-hydroxyacid dehydrogenase/reductase //	GO:0050662//	coenzyme binding//	molecular_function//
XLOC_032761	Solyc12g010840.1,Solyc12g010850.1	SL2.50ch12:3772927-3781014	-0.978304	0	0	Ketol-acid reductoisomerase (AHRD V1 ***- D7LW57_ARALY)%3B contains Interpro domain(s) IPR016206 Ketol-acid reductoisomerase%2C plant //Unknown Protein (AHRD V1)//	GO:0050662//no GOid	coenzyme binding//no GOterm//	molecular_function//no GO_branch//
XLOC_025942	Solyc09g083090.2	SL2.50ch09:68764702-68766430	0.589457	0	1.20208	CBL-interacting protein kinase 20 (AHRD V1 ***- C4P7W9_VITVI)%3B contains Interpro domain(s) IPR002290 Serine/threonine protein kinase //	GO:0048037//	cofactor binding//	molecular_function//
XLOC_006047	Solyc02g080290.2	SL2.50ch02:44554156-44557906	0.752583	0	0	Beta-glucosidase 47 (AHRD V1 **** D7MEP5_ARALY)%3B contains Interpro domain(s) IPR001360 Glycoside hydrolase%2C family 1 //	GO:0047782//	coniferin beta-glucosidase activity//	molecular_function//
XLOC_007151	Solyc02g063000.2	SL2.50ch02:35019138-35020978	0	0.849562	1.40973	Glucosyltransferase (AHRD V1 **** A7M6J8_9ERIC)%3B contains Interpro domain(s) IPR002213 UDP-glucuronosyl/UDP-glucosyltransferase //	GO:0047209//	coniferyl-alcohol glucosyltransferase activity//	molecular_function//
XLOC_009373	Solyc03g095970.2	SL2.50ch03:57690341-57691513	0	1.79302	0	3-beta hydroxysteroid dehydrogenase (AHRD V1 ***- Q5Q1I5_9LAMI)%3B contains Interpro domain(s) IPR002347 Glucose/ribitol dehydrogenase //	GO:0005507//	copper ion binding//	molecular_function//
XLOC_026420	Solyc09g010930.2	SL2.50ch09:4264024-4269432	-0.596916	0	0	NAD-dependent epimerase/dehydratase (AHRD V1 **-- B6T962_MAIZE)%3B contains Interpro domain(s) IPR016040 NAD(P)-binding domain //	GO:0005507//	copper ion binding//	molecular_function//
XLOC_021110	Solyc07g065900.2	SL2.50ch07:67492534-67495291	0	0.783601	2.2646	Fructose-bisphosphate aldolase (AHRD V1 ***- A9PEE1_POPTR)%3B contains Interpro domain(s) IPR000741 Fructose-bisphosphate aldolase%2C class-I //	GO:0005507//	copper ion binding//	molecular_function//
XLOC_034367	Solyc12g043020.1	SL2.50ch12:39245850-39259292	-0.640729	0	0	Dihydroxy-acid dehydratase (AHRD V1 **** A6C1E8_9PLAN)%3B contains Interpro domain(s) IPR004404 Dihydroxy-acid dehydratase //	GO:0005507//	copper ion binding//	molecular_function//
XLOC_029874	Solyc10g083570.1	SL2.50ch10:63360605-63363329	0	0	-0.506167	Fructose-bisphosphate aldolase (AHRD V1 ***- Q308A5_SOLTU)%3B contains Interpro domain(s) IPR000741 Fructose-bisphosphate aldolase%2C class-I //	GO:0005507//	copper ion binding//	molecular_function//
XLOC_026292	Solyc09g008200.2	SL2.50ch09:1652979-1655416	0	0	1.13815	Heavy metal-associated domain containing protein expressed (AHRD V1 *-*- Q10RN8_ORYSJ)%3B contains Interpro domain(s) IPR006121 Heavy metal transport/detoxification protein //	GO:0005507//	copper ion binding//	molecular_function//
XLOC_020660	Solyc07g049530.2,Solyc07g049550.2	SL2.50ch07:59830719-59849308	1.80607	-0.844008	0	1-aminocyclopropane-1-carboxylate oxidase (AHRD V1 ***- Q94F66_SOLTU)%3B contains Interpro domain(s) IPR005123 Oxoglutarate and iron-dependent oxygenase //1-aminocyclopropane-1-carboxylate oxidase (AHRD V1 **** Q94F66_SOLTU)%3B contains Interpro domain(s) IPR005123 Oxoglutarate and iron-dependent oxygenase //	GO:0005507//GO:0045544//	copper ion binding//gibberellin 20-oxidase activity//	molecular_function//molecular_function//
XLOC_007800	Solyc02g082080.1	SL2.50ch02:45801961-45805190	0.631243	0	0	High affinity copper uptake protein (AHRD V1 **** Q8QH07_DANRE)%3B contains Interpro domain(s) IPR007274 Ctr copper transporter //	GO:0015088//	copper uptake transmembrane transporter activity//	molecular_function//
XLOC_015737	Solyc05g055310.2	SL2.50ch05:64997085-65000021	0	-0.597782	0	Copper chaperone (AHRD V1 **** Q84KJ2_SOLLC)%3B contains Interpro domain(s) IPR006121 Heavy metal transport/detoxification protein //	GO:0032767//	copper-dependent protein binding//	molecular_function//
XLOC_005831	Solyc02g071930.1	SL2.50ch02:41294920-41295799	-1.37227	0	0	CTD small phosphatase-like protein (AHRD V1 *-** C3KI43_ANOFI)%3B contains Interpro domain(s) IPR011948 Dullard-like phosphatase domain //	GO:0008420//	CTD phosphatase activity//	molecular_function//
XLOC_006147	Solyc02g082190.2	SL2.50ch02:45890516-45896513	-0.914987	0	-0.598361	CTP synthase (AHRD V1 **** B6U7R1_MAIZE)%3B contains Interpro domain(s) IPR004468 CTP synthase //	GO:0003883//	CTP synthase activity//	molecular_function//
XLOC_003834	Solyc01g067120.2	SL2.50ch01:75482521-75485385	2.20122	0	0.700058	Cullin 1-like protein C (AHRD V1 ***- A0ELU7_PETIN)%3B contains Interpro domain(s) IPR016159 Cullin repeat-like //	GO:0031461//	cullin-RING ubiquitin ligase complex//	cellular_component//
XLOC_004497	Solyc01g099290.2	SL2.50ch01:89569491-89575414	0.730921	0.758455	0	Cullin-like protein1 (AHRD V1 ***- Q8LP18_PEA)%3B contains Interpro domain(s) IPR016159 Cullin repeat-like //	GO:0031461//	cullin-RING ubiquitin ligase complex//	cellular_component//
XLOC_015492	Solyc05g050360.2,Solyc05g050380.2	SL2.50ch05:60469225-60492347	1.35184	0	0	Cyclic nucleotide gated channel (AHRD V1 **** A9CRE4_MALDO)%3B contains Interpro domain(s) IPR000595 Cyclic nucleotide-binding //Cyclic nucleotide-gated ion channel 1 (AHRD V1 **** B6U0R1_MAIZE)%3B contains Interpro domain(s) IPR000595 Cyclic nucleotide-binding //	GO:0030551//GO:0030551//	cyclic nucleotide binding//cyclic nucleotide binding//	molecular_function//molecular_function//
XLOC_027114	Solyc09g074680.2	SL2.50ch09:66503828-66511531	0.544748	0	0	Cullin 1B (AHRD V1 ***- Q711G7_TOBAC)%3B contains Interpro domain(s) IPR001373 Cullin%2C N-terminal //	GO:0030332//	cyclin binding//	molecular_function//
XLOC_026883	Solyc09g061280.2	SL2.50ch09:58530916-58533688	0	0.628606	0	Cyclin dependent kinase inhibitor (AHRD V1 **** Q5PXG5_EUPES)%3B contains Interpro domain(s) IPR016701 Cyclin-dependent kinase inhibitor%2C plant //	GO:0030332//	cyclin binding//	molecular_function//
XLOC_014548	Solyc04g082840.2	SL2.50ch04:66369480-66371442	-1.61988	0	0	Cell division protein kinase 2 (AHRD V1 **** D0P087_PHYIN)%3B contains Interpro domain(s) IPR002290 Serine/threonine protein kinase //	GO:0004693//	cyclin-dependent protein serine/threonine kinase activity//	molecular_function//
XLOC_006006	Solyc02g079370.2	SL2.50ch02:43962118-43964670	-1.16799	0	0	Cyclin-D6-1 (AHRD V1 **** CCD61_ORYSJ)%3B contains Interpro domain(s) IPR015451 Cyclin D //	GO:0004693//	cyclin-dependent protein serine/threonine kinase activity//	molecular_function//
XLOC_001116	Solyc01g009040.2	SL2.50ch01:3041735-3045137	-1.59017	0.720507	0	Cyclin B1 (AHRD V1 **** Q9LD02_TOBAC)%3B contains Interpro domain(s) IPR014400 Cyclin%2C A/B/D/E //	GO:0016538//	cyclin-dependent protein serine/threonine kinase regulator activity//	molecular_function//
XLOC_017881	Solyc06g065680.2	SL2.50ch06:41099391-41107997	-1.59329	0	0	Cyclin-dependent protein kinase regulator-like protein (AHRD V1 *-** Q2V5Z8_BRACM)%3B contains Interpro domain(s) IPR015453 G2/mitotic-specific cyclin A //	GO:0016538//	cyclin-dependent protein serine/threonine kinase regulator activity//	molecular_function//
XLOC_007552	Solyc02g076750.1	SL2.50ch02:41854231-41859174	-0.850264	0	0	Cathepsin B-like cysteine proteinase (AHRD V1 **-* CYSP_SCHMA)%3B contains Interpro domain(s) IPR013128 Peptidase C1A%2C papain //	GO:0004197//	cysteine-type endopeptidase activity//	molecular_function//
XLOC_024286	Solyc08g065610.2	SL2.50ch08:53747462-53753363	1.61782	-1.02584	0.570978	Vacuolar processing enzyme-1b (AHRD V1 **-- Q852T2_TOBAC)%3B contains Interpro domain(s) IPR001096 Peptidase C13%2C legumain //	GO:0004197//	cysteine-type endopeptidase activity//	molecular_function//
XLOC_005890	Solyc02g076980.2	SL2.50ch02:42066263-42067642	2.19924	-0.913371	0	Cathepsin B-like cysteine proteinase (AHRD V1 **-* CYSP_SCHMA)%3B contains Interpro domain(s) IPR013128 Peptidase C1A%2C papain IPR000169 Peptidase%2C cysteine peptidase active site //	GO:0004197//	cysteine-type endopeptidase activity//	molecular_function//
XLOC_010188	Solyc03g006210.1	SL2.50ch03:837403-839267	1.74956	0	0	Cathepsin B-like cysteine proteinase (AHRD V1 **-* CYSP_SCHMA)%3B contains Interpro domain(s) IPR013128 Peptidase C1A%2C papain //	GO:0004197//	cysteine-type endopeptidase activity//	molecular_function//
XLOC_007547	Solyc02g076690.2	SL2.50ch02:41833255-41835924	-1.09036	0	0	Cathepsin B-like cysteine proteinase (AHRD V1 **-* CYSP_SCHMA)%3B contains Interpro domain(s) IPR013128 Peptidase C1A%2C papain //	GO:0004197//	cysteine-type endopeptidase activity//	molecular_function//
XLOC_013129	Solyc04g080960.2	SL2.50ch04:65016635-65019061	0	-0.868848	0	Cysteine proteinase cathepsin F (AHRD V1 **-* D3TN89_GLOMM)%3B contains Interpro domain(s) IPR013128 Peptidase C1A%2C papain //	GO:0004197//	cysteine-type endopeptidase activity//	molecular_function//
XLOC_014376	Solyc04g079470.2	SL2.50ch04:63948224-63950136	2.63428	0	0	Serpin (Serine protease inhibitor) (AHRD V1 **-* Q53P13_ORYSJ)%3B contains Interpro domain(s) IPR015554 Protease inhibitor I4%2C serpin%2C plant //	GO:0043027//	cysteine-type endopeptidase inhibitor activity involved in apoptotic process//	molecular_function//
XLOC_009436	Solyc03g097270.2	SL2.50ch03:59587547-59593766	0.706511	0	0	Cysteine proteinase inhibitor (AHRD V1 **** Q5Y7Z8_PETHY)%3B contains Interpro domain(s) IPR000010 Proteinase inhibitor I25%2C cystatin //	GO:0004869//	cysteine-type endopeptidase inhibitor activity//	molecular_function//
XLOC_000694	Solyc00g071180.2	SL2.50ch00:14602006-14605548	-2.13585	0	0	Cysteine proteinase inhibitor (AHRD V1 *-** Q2VY67_9ERIC)%3B contains Interpro domain(s) IPR000010 Proteinase inhibitor I25%2C cystatin //	GO:0004869//	cysteine-type endopeptidase inhibitor activity//	molecular_function//
XLOC_015680	Solyc05g054120.1	SL2.50ch05:64086540-64086930	-1.26631	0	-0.755324	Cysteine proteinase inhibitor (AHRD V1 *-*- Q9ARH0_DIACA)%3B contains Interpro domain(s) IPR000010 Proteinase inhibitor I25%2C cystatin //	GO:0004869//	cysteine-type endopeptidase inhibitor activity//	molecular_function//
XLOC_020556	Solyc07g043510.2	SL2.50ch07:57367966-57373799	0.856573	0	0	Cysteine-type peptidase (AHRD V1 **** B6U3W2_MAIZE)%3B contains Interpro domain(s) IPR003323 Ovarian tumour%2C otubain //	GO:0008234//	cysteine-type peptidase activity//	molecular_function//
XLOC_021468	Solyc07g019510.2	SL2.50ch07:11854352-11856013	-2.31833	0	0	Cytochrome c oxidase subunit 1 (AHRD V1 **** Q70G75_9SOLN)%3B contains Interpro domain(s) IPR000883 Cytochrome c oxidase%2C subunit I //	GO:0004129//	cytochrome-c oxidase activity//	molecular_function//
XLOC_030971	Solyc11g063610.1	SL2.50ch11:49640711-49642205	-2.58495	1.03643	0	Cytochrome c oxidase subunit 1 (AHRD V1 **** Q70G75_9SOLN)%3B contains Interpro domain(s) IPR000883 Cytochrome c oxidase%2C subunit I //	GO:0004129//	cytochrome-c oxidase activity//	molecular_function//
XLOC_025030	Solyc09g007270.2	SL2.50ch09:865196-869322	1.82304	0	0	Ascorbate peroxidase (AHRD V1 **** B9VRH6_CITMA)%3B contains Interpro domain(s) IPR002207 Plant ascorbate peroxidase //	GO:0004130//	cytochrome-c peroxidase activity//	molecular_function//
XLOC_022993	Solyc08g061930.2	SL2.50ch08:49996662-50000415	0.71468	0	1.12789	Cytokinin oxidase/dehydrogenase (AHRD V1 **** C3VPM8_SOLTU)%3B contains Interpro domain(s) IPR015345 Cytokinin dehydrogenase 1%2C FAD and cytokinin binding //	GO:0019139//	cytokinin dehydrogenase activity//	molecular_function//
XLOC_014445	Solyc04g080820.2	SL2.50ch04:64891807-64897323	0.585416	0	0	Cytokinin oxidase/dehydrogenase (AHRD V1 **** C3VPM7_SOLTU)%3B contains Interpro domain(s) IPR015345 Cytokinin dehydrogenase 1%2C FAD and cytokinin binding //	GO:0019139//	cytokinin dehydrogenase activity//	molecular_function//
XLOC_013580	Solyc04g016430.2	SL2.50ch04:7229848-7232636	1.17377	0	0	Cytokinin oxidase/dehydrogenase 1 (AHRD V1 **** C0LPA6_SOLTU)%3B contains Interpro domain(s) IPR015345 Cytokinin dehydrogenase 1%2C FAD and cytokinin binding //	GO:0019139//	cytokinin dehydrogenase activity//	molecular_function//
XLOC_004110	Solyc01g088160.2	SL2.50ch01:83010890-83013178	1.36954	0	1.31322	Cytokinin oxidase/dehydrogenase (AHRD V1 **** C3VPM6_SOLTU)%3B contains Interpro domain(s) IPR015345 Cytokinin dehydrogenase 1%2C FAD and cytokinin binding //	GO:0019139//	cytokinin dehydrogenase activity//	molecular_function//
XLOC_015081	Solyc05g015610.2	SL2.50ch05:11522013-11528332	0.584246	0	0.532298	Histidine kinase cytokinin receptor (AHRD V1 **** B9GZP2_POPTR)%3B contains Interpro domain(s) IPR006189 CHASE //	GO:0009884//	cytokinin receptor activity//	molecular_function//
XLOC_034617	Solyc12g055830.1	SL2.50ch12:61826704-61830545	0.551751	0	0	Inorganic pyrophosphatase (AHRD V1 ***- D1MVT0_BRARC)%3B contains Interpro domain(s) IPR008162 Inorganic pyrophosphatase //	GO:0005737//	cytoplasm//	cellular_component//
XLOC_034054	Solyc12g014530.1	SL2.50ch12:5498009-5504357	0	0	0.538298	L-aspartate oxidase (AHRD V1 ***- D7M6M9_ARALY)%3B contains Interpro domain(s) IPR005288 L-aspartate oxidase //	GO:0005737//	cytoplasm//	cellular_component//
XLOC_024351	Solyc08g067050.2	SL2.50ch08:55962020-55968795	0	0	0.606623	Arginine N-methyltransferase family protein (AHRD V1 ***- D7KE86_ARALY)%3B contains Interpro domain(s) IPR010456 Ribosomal L11 methyltransferase //	GO:0005737//	cytoplasm//	cellular_component//
XLOC_026127	Solyc09g092740.2	SL2.50ch09:71674165-71675655	-1.20317	0	0	Unknown Protein (AHRD V1)%3B contains Interpro domain(s) IPR010800 Glycine rich //	GO:0005737//	cytoplasm//	cellular_component//
XLOC_004543	Solyc01g100360.2	SL2.50ch01:90416684-90423981	-0.536855	0	0	Dihydrolipoyl dehydrogenase (AHRD V1 ***- B5LAW5_CAPAN)%3B contains Interpro domain(s) IPR006258 Dihydrolipoamide dehydrogenase //	GO:0005737//	cytoplasm//	cellular_component//
XLOC_027403	Solyc09g092740.2	SL2.50ch09:71674165-71675655	-1.32545	0	0	Unknown Protein (AHRD V1)%3B contains Interpro domain(s) IPR010800 Glycine rich //	GO:0005737//	cytoplasm//	cellular_component//
XLOC_031608	Solyc11g012270.1	SL2.50ch11:5135823-5138781	-0.64551	0	0	RHO protein GDP dissociation inhibitor (AHRD V1 ***- Q705X3_MEDTR)%3B contains Interpro domain(s) IPR000406 RHO protein GDP dissociation inhibitor //	GO:0005737//	cytoplasm//	cellular_component//
XLOC_000832	Solyc00g187050.2	SL2.50ch00:18478268-18481034	-1.05916	0	-2.61022	Leucyl aminopeptidase (AHRD V1 ***- D7DWG6_NOSA0)%3B contains Interpro domain(s) IPR011356 Peptidase M17%2C leucyl aminopeptidase //	GO:0005737//	cytoplasm//	cellular_component//
XLOC_033881	Solyc12g008650.1	SL2.50ch12:2025087-2029029	2.28042	0	-1.60997	Inositol oxygenase (AHRD V1 ***- A5FF81_FLAJ1)%3B contains Interpro domain(s) IPR007828 Protein of unknown function DUF706 //	GO:0005737//	cytoplasm//	cellular_component//
XLOC_031376	Solyc11g006420.1	SL2.50ch11:1127425-1134299	0	0.743685	0.733262	5%26apos-nucleotidase cytosolic III (AHRD V1 ***- B2GUX5_RAT)%3B contains Interpro domain(s) IPR006434 HAD-superfamily hydrolase%2C subfamily IE //	GO:0005737//	cytoplasm//	cellular_component//
XLOC_004717	Solyc01g105060.2	SL2.50ch01:93333983-93336912	-0.543741	0	0	(3R)-hydroxymyristoyl- (AHRD V1 ***- Q9LX13_ARATH)%3B contains Interpro domain(s) IPR010084 Beta-hydroxyacyl-(acyl-carrier-protein) dehydratase FabZ //	GO:0005737//	cytoplasm//	cellular_component//
XLOC_017567	Solyc06g050930.2	SL2.50ch06:33882570-33891631	0.789358	0	0	Endo beta n-acetylglucosaminidase (AHRD V1 *-*- Q16SQ0_AEDAE)%3B contains Interpro domain(s) IPR005201 Glycoside hydrolase%2C family 85 //	GO:0005737//	cytoplasm//	cellular_component//
XLOC_026530	Solyc09g015070.2	SL2.50ch09:7889719-7892947	-4.29346	0	-2.11356	Reductase 1 (AHRD V1 ***- Q6TY49_HYDMC)%3B contains Interpro domain(s) IPR020471 Aldo/keto reductase subgroup //	GO:0045290//	D-arabinose 1-dehydrogenase [NAD(P)+] activity//	molecular_function//
XLOC_004302	Solyc01g095010.2	SL2.50ch01:86376983-86382216	-0.638279	0	0	Diacylglycerol kinase catalytic region (AHRD V1 **** D0LGX1_HALO1)%3B contains Interpro domain(s) IPR001206 Diacylglycerol kinase%2C catalytic region //	GO:0017050//	D-erythro-sphingosine kinase activity//	molecular_function//
XLOC_025228	Solyc09g011240.2	SL2.50ch09:4572284-4578442	1.06706	0	1.02463	Reductase 2 (AHRD V1 **** Q6TY50_HYDMC)%3B contains Interpro domain(s) IPR020471 Aldo/keto reductase subgroup //	GO:0032866//	D-xylose:NADP reductase activity//	molecular_function//
XLOC_034388	Solyc12g042470.1	SL2.50ch12:40110445-40114285	0.731104	0	1.2637	Reductase 2 (AHRD V1 **** Q6TY50_HYDMC)%3B contains Interpro domain(s) IPR020471 Aldo/keto reductase subgroup //	GO:0032866//	D-xylose:NADP reductase activity//	molecular_function//
XLOC_002840	Solyc01g109460.2	SL2.50ch01:96406721-96409894	0.619255	0	0	Solute carrier family 2%2C facilitated glucose transporter member 3 (AHRD V1 ***- GTR3_RAT)%3B contains Interpro domain(s) IPR003663 Sugar/inositol transporter //	GO:0015519//	D-xylose:proton symporter activity//	molecular_function//
XLOC_008728	Solyc03g032040.2	SL2.50ch03:4553637-4559925	0.955442	0	0	MFS family major facilitator transporter D-xylose cation symporter (AHRD V1 *-** D4E1S5_SEROD)%3B contains Interpro domain(s) IPR016196 Major facilitator superfamily%2C general substrate transporter //	GO:0015519//	D-xylose:proton symporter activity//	molecular_function//
XLOC_006339	Solyc02g086160.2	SL2.50ch02:48911305-48923476	-0.545905	0	0	D-xylose transporter (AHRD V1 **** D0DTW3_LACFE)%3B contains Interpro domain(s) IPR003663 Sugar/inositol transporter //	GO:0015519//	D-xylose:proton symporter activity//	molecular_function//
XLOC_021480	Solyc07g020790.2	SL2.50ch07:13483225-13489718	0	0	0.602758	D-xylose-proton symporter (D-xylose transporter) (AHRD V1 **** B5CJI7_SALET)%3B contains Interpro domain(s) IPR003663 Sugar/inositol transporter //	GO:0015519//	D-xylose:proton symporter activity//	molecular_function//
XLOC_007641	Solyc02g078600.2	SL2.50ch02:43251695-43257692	0.772209	0	0	Solute carrier family 2%2C facilitated glucose transporter member 3 (AHRD V1 ***- GTR3_CHICK)%3B contains Interpro domain(s) IPR003663 Sugar/inositol transporter //	GO:0015519//	D-xylose:proton symporter activity//	molecular_function//
XLOC_020646	Solyc07g049310.2	SL2.50ch07:59559469-59568238	0	0	-0.562033	D-xylose transporter (AHRD V1 **** D0DTW3_LACFE)%3B contains Interpro domain(s) IPR003663 Sugar/inositol transporter //	GO:0015519//	D-xylose:proton symporter activity//	molecular_function//
XLOC_025817	Solyc09g074300.1	SL2.50ch09:66087983-66088412	-1.47567	0	-0.607148	Histone H2A (AHRD V1 ***- B9REZ0_RICCO)%3B contains Interpro domain(s) IPR002119 Histone H2A //	GO:0003684//	damaged DNA binding//	molecular_function//
XLOC_032436	Solyc11g073250.1	SL2.50ch11:56271928-56272463	-1.06514	0	0	Histone H2A (AHRD V1 ***- C6TMV8_SOYBN)%3B contains Interpro domain(s) IPR002119 Histone H2A //	GO:0003684//	damaged DNA binding//	molecular_function//
XLOC_025183	Solyc09g010400.2	SL2.50ch09:3777856-3778870	-1.14873	0	-0.629726	Histone H2A (AHRD V1 ***- B9T4D3_RICCO)%3B contains Interpro domain(s) IPR002119 Histone H2A //	GO:0003684//	damaged DNA binding//	molecular_function//
XLOC_024453	Solyc08g074270.2	SL2.50ch08:58368990-58374303	0	0	0.682898	Cryptochrome 3//	GO:0003684//	damaged DNA binding//	molecular_function//
XLOC_002512	Solyc01g102850.1	SL2.50ch01:91538271-91542454	0	0	1.85273	Tir-nbs-lrr%2C resistance protein//	GO:0006952//	defense response//	biological_process//
XLOC_014985	Solyc05g013280.2	SL2.50ch05:6376049-6386995	0.583306	0	0.836902	Cc-nbs-lrr%2C resistance protein with an R1 specific domain//	GO:0006952//	defense response//	biological_process//
XLOC_014653	Solyc05g005330.2	SL2.50ch05:262591-267056	0	0	0.615594	Cc-nbs-lrr%2C resistance protein with an R1 specific domain//	GO:0006952//	defense response//	biological_process//
XLOC_025054	Solyc09g007710.2	SL2.50ch09:1257610-1263725	1.18755	0	1.78073	Tir-nbs-lrr%2C resistance protein//	GO:0006952//	defense response//	biological_process//
XLOC_030179	Solyc11g006640.1	SL2.50ch11:1242248-1246988	1.05171	0	0	Cc-nbs-lrr%2C resistance protein//	GO:0006952//	defense response//	biological_process//
XLOC_016029	Solyc05g009760.1	SL2.50ch05:3954679-3957982	0.612798	0	0	Nbs-lrr%2C resistance protein//	GO:0006952//	defense response//	biological_process//
XLOC_016027	Solyc05g009740.1	SL2.50ch05:3947017-3950264	0.605828	0	0	Nbs-lrr%2C resistance protein//	GO:0006952//	defense response//	biological_process//
XLOC_033805	Solyc12g006040.1	SL2.50ch12:632430-636204	1.54155	0	1.53707	Nbs%2C resistance protein fragment//	GO:0006952//	defense response//	biological_process//
XLOC_011889	Solyc04g005550.1	SL2.50ch04:362572-366873	0.917927	0	1.61007	Cc-nbs-lrr%2C resistance protein//	GO:0006952//	defense response//	biological_process//
XLOC_011971	Solyc04g008200.2	SL2.50ch04:1861435-1876714	1.64419	0	0	Cc-nbs-lrr%2C resistance protein//	GO:0006952//	defense response//	biological_process//
XLOC_031382	Solyc11g006520.1	SL2.50ch11:1181635-1184459	2.66714	0	2.08636	Cc-nbs-lrr%2C resistance protein//	GO:0006952//	defense response//	biological_process//
XLOC_027414	Solyc09g098100.2	SL2.50ch09:71987615-72003686	0.679598	0	0	Cc-nbs-lrr%2C resistance protein//	GO:0006952//	defense response//	biological_process//
XLOC_026155	Solyc09g098130.1	SL2.50ch09:72027830-72032881	0.62163	0.682326	1.01739	Cc-nbs-lrr%2C resistance protein//	GO:0006952//	defense response//	biological_process//
XLOC_031723	Solyc11g020100.1	SL2.50ch11:10135583-10139808	1.58657	0	1.05145	Cc-nbs-lrr%2C resistance protein//	GO:0006952//	defense response//	biological_process//
XLOC_020002	Solyc07g006380.2	SL2.50ch07:1207407-1209037	-6.7851	0	0	Defensin-like protein (AHRD V1 ***- Q948T3_PYRPY)%3B contains Interpro domain(s) IPR008177 Gamma Purothionin //	GO:0006952//	defense response//	biological_process//
XLOC_023815	Solyc08g007250.1	SL2.50ch08:1830375-1835999	1.20782	0	1.83932	Cc-nbs-lrr%2C resistance protein//	GO:0006952//	defense response//	biological_process//
XLOC_011918	Solyc04g007070.2	SL2.50ch04:791049-796086	0.935892	0	0	Cc-nbs-lrr%2C resistance protein//	GO:0006952//	defense response//	biological_process//
XLOC_016884	Solyc05g054010.2	SL2.50ch05:63986304-63990703	1.25791	0	0	Cc-nbs-lrr%2C resistance protein//	GO:0006952//	defense response//	biological_process//
XLOC_033137	Solyc12g044190.1,Solyc12g044200.1	SL2.50ch12:38832130-38893141	0.592005	0	0.635328	Nbs-lrr%2C resistance protein//Cc-nbs-lrr%2C resistance protein//	GO:0006952//GO:0006952//	defense response//defense response//	biological_process//biological_process//
XLOC_019720	Solyc06g076920.2	SL2.50ch06:47791703-47793842	-1.20901	0	-0.753536	Undecaprenyl pyrophosphate synthase (AHRD V1 **** D8G636_9CYAN)%3B contains Interpro domain(s) IPR001441 Di-trans-poly-cis-decaprenylcistransferase-like //	GO:0045547//	dehydrodolichyl diphosphate synthase activity//	molecular_function//
XLOC_031753	Solyc11g020780.1	SL2.50ch11:11992529-11997532	-0.956387	0	0	Deoxyguanosine kinase 3 (AHRD V1 *-** Q91XI5_MOUSE)%3B contains Interpro domain(s) IPR002624 Deoxynucleoside kinase //	GO:0004138//	deoxyguanosine kinase activity//	molecular_function//
XLOC_016178	Solyc05g013750.2	SL2.50ch05:7063711-7067746	1.22195	0	0	Dual specificity phosphatase 4 (AHRD V1 *-*- Q7SZF3_DANRE)%3B contains Interpro domain(s) IPR020422 Dual specificity phosphatase%2C subgroup%2C catalytic domain //	GO:0016311//	dephosphorylation//	biological_process//
XLOC_031593	Solyc11g011970.1	SL2.50ch11:4920610-4924607	0.610105	0	0.854374	Tyrosine phosphatase family protein (AHRD V1 ***- B8N9Z8_ASPFN)%3B contains Interpro domain(s) IPR020428 Protein-tyrosine phosphatase%2C dual specificity phosphatase%2C eukaryotic //	GO:0016311//	dephosphorylation//	biological_process//
XLOC_018126	Solyc06g072460.1	SL2.50ch06:44695609-44696722	1.26871	0	0	CHP-rich zinc finger protein-like (AHRD V1 *--- Q8H5Y9_ORYSJ)%3B contains Interpro domain(s) IPR011424 C1-like //	GO:0019992//	diacylglycerol binding//	molecular_function//
XLOC_001910	Solyc01g073890.2	SL2.50ch01:81215508-81217001	2.22083	0	0	CHP-rich zinc finger protein-like (AHRD V1 *--- Q9FJG5_ARATH)%3B contains Interpro domain(s) IPR011424 C1-like //	GO:0019992//	diacylglycerol binding//	molecular_function//
XLOC_009745	Solyc03g115370.2	SL2.50ch03:65094249-65102139	0.829936	0	0	Diacylglycerol kinase 1 (AHRD V1 **** A8QM12_MAIZE)%3B contains Interpro domain(s) IPR000756 Diacylglycerol kinase accessory region //	GO:0004143//	diacylglycerol kinase activity//	molecular_function//
XLOC_022953	Solyc08g061090.2	SL2.50ch08:46654226-46658022	-0.571835	0	0	Mitochondrial carrier family (AHRD V1 ***- C1MYP8_MICPS)%3B contains Interpro domain(s) IPR002067 Mitochondrial carrier protein //	GO:0005310//	dicarboxylic acid transmembrane transporter activity//	molecular_function//
XLOC_016016	Solyc05g009530.2	SL2.50ch05:3737121-3743261	-0.639168	0	0	Dihydrolipoyllysine-residue acetyltransferase component of pyruvate dehydrogenase complex (AHRD V1 **** A5GUY8_SYNR3)%3B contains Interpro domain(s) IPR001078 2-oxoacid dehydrogenase acyltransferase%2C catalytic domain //	GO:0004742//	dihydrolipoyllysine-residue acetyltransferase activity//	molecular_function//
XLOC_000151	Solyc00g024150.2	SL2.50ch00:12180217-12182879	0	0	0.65364	Pterin-4-alpha-carbinolamine dehydratase (AHRD V1 *-** B6T9C1_MAIZE)%3B contains Interpro domain(s) IPR001533 Transcriptional coactivator/pterin dehydratase //	GO:0004160//	dihydroxy-acid dehydratase activity//	molecular_function//
XLOC_023477	Solyc08g078950.2	SL2.50ch08:62610804-62616323	0.747373	0	0	Nitrate transporter (AHRD V1 **** Q852P7_TOBAC)%3B contains Interpro domain(s) IPR000109 TGF-beta receptor%2C type I/II extracellular region //	GO:0042936//	dipeptide transporter activity//	molecular_function//
XLOC_004616	Solyc01g103030.2	SL2.50ch01:91697124-91701757	1.3191	0.774278	0	Nitrate transporter (AHRD V1 **** Q7XAK5_PRUPE)%3B contains Interpro domain(s) IPR000109 TGF-beta receptor%2C type I/II extracellular region //	GO:0042936//	dipeptide transporter activity//	molecular_function//
XLOC_029169	Solyc10g039290.1	SL2.50ch10:21031046-21039911	1.049	0	0.775534	Peptide transporter-like protein (AHRD V1 **-* Q9LSE8_ARATH)%3B contains Interpro domain(s) IPR000109 TGF-beta receptor%2C type I/II extracellular region //	GO:0042936//	dipeptide transporter activity//	molecular_function//
XLOC_004393	Solyc01g096880.2	SL2.50ch01:87873760-87877418	1.28693	0	0	Nitrate transporter (AHRD V1 **** Q9SZY4_ARATH)%3B contains Interpro domain(s) IPR000109 TGF-beta receptor%2C type I/II extracellular region //	GO:0042936//	dipeptide transporter activity//	molecular_function//
XLOC_014734	Solyc05g006990.2	SL2.50ch05:1582053-1588984	1.318	0	0	Nitrate transporter (AHRD V1 **-* Q7XAK5_PRUPE)%3B contains Interpro domain(s) IPR000109 TGF-beta receptor%2C type I/II extracellular region //	GO:0042936//	dipeptide transporter activity//	molecular_function//
XLOC_017739	Solyc06g060620.2	SL2.50ch06:38644634-38647717	1.46352	0	0.835531	Nitrate transporter (AHRD V1 **** Q852P5_TOBAC)%3B contains Interpro domain(s) IPR000109 TGF-beta receptor%2C type I/II extracellular region //	GO:0042936//	dipeptide transporter activity//	molecular_function//
XLOC_022571	Solyc08g007060.2	SL2.50ch08:1629018-1635965	2.98009	0	1.8523	Peptide transporter-like protein (AHRD V1 **-* Q9SVS9_ARATH)%3B contains Interpro domain(s) IPR000109 TGF-beta receptor%2C type I/II extracellular region //	GO:0042936//	dipeptide transporter activity//	molecular_function//
XLOC_003982	Solyc01g080870.2	SL2.50ch01:80184916-80189049	1.47128	0	1.97286	Peptide transporter-like protein (AHRD V1 **-* Q9SVS9_ARATH)%3B contains Interpro domain(s) IPR000109 TGF-beta receptor%2C type I/II extracellular region //	GO:0042936//	dipeptide transporter activity//	molecular_function//
XLOC_011305	Solyc03g113420.2	SL2.50ch03:63564751-63568730	1.26133	0	0	Peptide transporter (AHRD V1 **-* A6YJX4_9MAGN)%3B contains Interpro domain(s) IPR000109 TGF-beta receptor%2C type I/II extracellular region //	GO:0042936//	dipeptide transporter activity//	molecular_function//
XLOC_021626	Solyc07g032490.2	SL2.50ch07:39519550-39522061	2.12445	0	0.910672	Nitrate transporter (AHRD V1 **** Q9SZY4_ARATH)%3B contains Interpro domain(s) IPR000109 TGF-beta receptor%2C type I/II extracellular region //	GO:0042936//	dipeptide transporter activity//	molecular_function//
XLOC_011306	Solyc03g113430.2	SL2.50ch03:63574531-63576903	1.001	0	1.05426	Peptide transporter (AHRD V1 **-* A6YJX4_9MAGN)%3B contains Interpro domain(s) IPR000109 TGF-beta receptor%2C type I/II extracellular region //	GO:0042936//	dipeptide transporter activity//	molecular_function//
XLOC_023388	Solyc08g077170.2	SL2.50ch08:61081936-61087733	0.902499	0	0.810425	Peptide transporter-like protein (AHRD V1 **-* Q9SVS9_ARATH)%3B contains Interpro domain(s) IPR000109 TGF-beta receptor%2C type I/II extracellular region //	GO:0042936//	dipeptide transporter activity//	molecular_function//
XLOC_019713	Solyc06g076750.2	SL2.50ch06:47658833-47662828	0.907487	0	0	Peptide transporter (AHRD V1 **-* O48542_HORVU)%3B contains Interpro domain(s) IPR000109 TGF-beta receptor%2C type I/II extracellular region //	GO:0042936//	dipeptide transporter activity//	molecular_function//
XLOC_013491	Solyc04g014500.2	SL2.50ch04:4728738-4732903	-0.531639	0	0	Diphosphoinositol polyphosphate phosphohydrolase (AHRD V1 *--* B0WVR6_CULQU)%3B contains Interpro domain(s) IPR000086 NUDIX hydrolase domain //	GO:0008486//	diphosphoinositol-polyphosphate diphosphatase activity//	molecular_function//
XLOC_033747	Solyc12g100330.1	SL2.50ch12:67089828-67096240	-0.71108	0	0	Cytosine-specific methyltransferase (AHRD V1 **** B9GLJ3_POPTR)%3B contains Interpro domain(s) IPR001525 C-5 cytosine-specific DNA methylase //	GO:0003886//	DNA (cytosine-5-)-methyltransferase activity//	molecular_function//
XLOC_027525	Solyc10g005050.2	SL2.50ch10:50240-52495	-0.986306	0	0	Thylakoid membrane phosphoprotein 14 kDa%2C chloroplastic (AHRD V1 **-- TMP14_ARATH)//	GO:0003677//	DNA binding//	molecular_function//
XLOC_019125	Solyc06g060490.2	SL2.50ch06:38513083-38518925	-0.542965	0	-0.522836	BZIP transcription factor family protein (AHRD V1 *-*- D7LF63_ARALY)%3B contains Interpro domain(s) IPR011700 Basic leucine zipper //	GO:0003677//	DNA binding//	molecular_function//
XLOC_023873	Solyc08g008480.2	SL2.50ch08:2871830-2873624	0	0	1.36168	Myb transcription factor (AHRD V1 *--- A5A383_SOLSC)%3B contains Interpro domain(s) IPR015495 Myb transcription factor //	GO:0003677//	DNA binding//	molecular_function//
XLOC_011593	Solyc03g119370.1	SL2.50ch03:67999326-68000440	3.89032	0	0	MYB transcription factor (AHRD V1 *-*- Q9C9G7_ARATH)%3B contains Interpro domain(s) IPR015495 Myb transcription factor //	GO:0003677//	DNA binding//	molecular_function//
XLOC_015933	Solyc05g007710.2	SL2.50ch05:2195501-2197614	-1.77422	0	0	MYB transcription factor (AHRD V1 *--- Q6R098_ARATH)%3B contains Interpro domain(s) IPR015495 Myb transcription factor //	GO:0003677//	DNA binding//	molecular_function//
XLOC_002036	Solyc01g090310.2	SL2.50ch01:83975320-83976020	0.962287	0	-1.6881	Ethylene responsive transcription factor 1a (AHRD V1 *-*- C0J9I9_9ROSA)%3B contains Interpro domain(s) IPR001471 Pathogenesis-related transcriptional factor and ERF%2C DNA-binding //	GO:0003677//	DNA binding//	molecular_function//
XLOC_018365	Solyc06g082040.1	SL2.50ch06:47996245-48000100	0	0	0.844247	Agenet domain-containing protein (AHRD V1 *-*- D7KJP0_ARALY)%3B contains Interpro domain(s) IPR008395 Agenet //	GO:0003677//	DNA binding//	molecular_function//
XLOC_026075	Solyc09g091650.2	SL2.50ch09:70879457-70895194	-0.963817	0.896055	0	Replication factor C large subunit (AHRD V1 *-*- B8D4I5_DESK1)%3B contains Interpro domain(s) IPR003959 ATPase%2C AAA-type%2C core //	GO:0003677//	DNA binding//	molecular_function//
XLOC_008215	Solyc02g090800.1	SL2.50ch02:52296370-52296766	inf	0	0	Ethylene responsive transcription factor 2a (AHRD V1 *-*- C0J9I7_9ROSA)%3B contains Interpro domain(s) IPR001471 Pathogenesis-related transcriptional factor and ERF%2C DNA-binding //	GO:0003677//	DNA binding//	molecular_function//
XLOC_011914	Solyc04g007000.1	SL2.50ch04:728927-730046	-0.740396	-0.525307	-0.532558	Ethylene-responsive transcription factor 4 (AHRD V1 *-** ERF78_ARATH)%3B contains Interpro domain(s) IPR003340 Transcriptional factor B3 //	GO:0003677//	DNA binding//	molecular_function//
XLOC_008846	Solyc03g044300.2	SL2.50ch03:8777727-8782356	-0.971242	0	0	AP2-like ethylene-responsive transcription factor At1g16060 (AHRD V1 *-*- AP2L1_ARATH)%3B contains Interpro domain(s) IPR001471 Pathogenesis-related transcriptional factor and ERF%2C DNA-binding //	GO:0003677//	DNA binding//	molecular_function//
XLOC_025870	Solyc09g075420.2	SL2.50ch09:67127406-67128628	0	0	-1.13456	Ethylene responsive transcription factor 2b (AHRD V1 *-*- C0J9I6_9ROSA)%3B contains Interpro domain(s) IPR001471 Pathogenesis-related transcriptional factor and ERF%2C DNA-binding IPR001711 Phospholipase C%2C phosphatidylinositol-specific%2C Y domain //	GO:0003677//	DNA binding//	molecular_function//
XLOC_015051	Solyc05g014710.2	SL2.50ch05:8843398-8846823	-2.09875	0	-0.794455	Remorin family protein (AHRD V1 ***- D7KET1_ARALY)%3B contains Interpro domain(s) IPR005516 Remorin%2C C-terminal region //	GO:0003677//	DNA binding//	molecular_function//
XLOC_033422	Solyc12g056590.1	SL2.50ch12:62548886-62550626	0.902763	0	0	Ethylene responsive transcription factor 2a (AHRD V1 *-*- C0J9I7_9ROSA)%3B contains Interpro domain(s) IPR001471 Pathogenesis-related transcriptional factor and ERF%2C DNA-binding //	GO:0003677//	DNA binding//	molecular_function//
XLOC_031179	Solyc11g069850.1	SL2.50ch11:54477863-54482230	-1.68032	0	0	Telomere repeat-binding protein 4 (AHRD V1 *-*- TRP4_ARATH)%3B contains Interpro domain(s) IPR001005 SANT%2C DNA-binding //	GO:0003677//	DNA binding//	molecular_function//
XLOC_008275	Solyc02g092050.2	SL2.50ch02:53258501-53262032	-0.997273	0	0	AP2-like ethylene-responsive transcription factor At1g16060 (AHRD V1 *-*- AP2L1_ARATH)%3B contains Interpro domain(s) IPR001471 Pathogenesis-related transcriptional factor and ERF%2C DNA-binding //	GO:0003677//	DNA binding//	molecular_function//
XLOC_019752	Solyc06g082590.1	SL2.50ch06:48363384-48366724	0.873123	0	0	Ethylene responsive transcription factor 1b (AHRD V1 *-*- C0J9I8_9ROSA)%3B contains Interpro domain(s) IPR001471 Pathogenesis-related transcriptional factor and ERF%2C DNA-binding IPR017392 Pathogenesis-related genes transcriptional activator PTI6 //	GO:0003677//	DNA binding//	molecular_function//
XLOC_004219	Solyc01g091370.2	SL2.50ch01:85002548-85006971	0	0.573985	0	AT-hook motif nuclear localized protein 1 (AHRD V1 ***- Q8VYJ2_ARATH)%3B contains Interpro domain(s) IPR005175 Protein of unknown function DUF296 //	GO:0003677//	DNA binding//	molecular_function//
XLOC_002890	Solyc01g110480.2	SL2.50ch01:97179796-97182822	0.643307	0	0	BZIP transcription factor family protein expressed (AHRD V1 *-*- Q8LN44_ORYSJ)%3B contains Interpro domain(s) IPR011616 bZIP transcription factor%2C bZIP-1 //	GO:0003677//	DNA binding//	molecular_function//
XLOC_003598	Solyc01g057080.1	SL2.50ch01:58294727-58295069	inf	0	0	Ethylene-responsive transcription factor 13 (AHRD V1 *-*- ERF99_ARATH)%3B contains Interpro domain(s) IPR001471 Pathogenesis-related transcriptional factor and ERF%2C DNA-binding //	GO:0003677//	DNA binding//	molecular_function//
XLOC_014999	Solyc05g013540.1	SL2.50ch05:6814091-6815252	-1.20881	0	0	Ethylene-responsive transcription factor ERF086 (AHRD V1 *-*- D7LXW6_ARALY)%3B contains Interpro domain(s) IPR001471 Pathogenesis-related transcriptional factor and ERF%2C DNA-binding //	GO:0003677//	DNA binding//	molecular_function//
XLOC_022371	Solyc07g066320.2	SL2.50ch07:67787717-67792328	0	-0.550706	-0.676425	Protein recA (AHRD V1 ***- B6T788_MAIZE)%3B contains Interpro domain(s) IPR013765 RecA //	GO:0003677//	DNA binding//	molecular_function//
XLOC_006682	Solyc02g093150.2	SL2.50ch02:54077822-54080780	0.614374	0	0.650274	AP2-like ethylene-responsive transcription factor At1g16060 (AHRD V1 *-*- AP2L1_ARATH)%3B contains Interpro domain(s) IPR001471 Pathogenesis-related transcriptional factor and ERF%2C DNA-binding //	GO:0003677//	DNA binding//	molecular_function//
XLOC_020597	Solyc07g045100.1	SL2.50ch07:58217813-58219463	0.919403	0	0	Aspartic proteinase nepenthesin I (AHRD V1 **-- A9ZMF9_NEPAL)%3B contains Interpro domain(s) IPR001461 Peptidase A1 //	GO:0003677//	DNA binding//	molecular_function//
XLOC_034648	Solyc12g056540.1	SL2.50ch12:62486582-62486993	-2.46155	0	0	Histone H3 (AHRD V1 ***- Q5S265_CAMSI)%3B contains Interpro domain(s) IPR000164 Histone H3 //	GO:0003677//	DNA binding//	molecular_function//
XLOC_024353	Solyc08g067100.2	SL2.50ch08:56011550-56015552	0.772694	0	0.71172	Aspartic proteinase nepenthesin-1 (AHRD V1 **-- C0JA51_9ORYZ)%3B contains Interpro domain(s) IPR001461 Peptidase A1 //	GO:0003677//	DNA binding//	molecular_function//
XLOC_033904	Solyc12g009240.1	SL2.50ch12:2519863-2520610	0	0	-0.840903	Ethylene-responsive transcription factor 4 (AHRD V1 *-*- ERF78_ARATH)%3B contains Interpro domain(s) IPR001471 Pathogenesis-related transcriptional factor and ERF%2C DNA-binding //	GO:0003677//	DNA binding//	molecular_function//
XLOC_030848	Solyc11g042560.1	SL2.50ch11:36072302-36072824	1.83411	0	0	Ethylene-responsive transcription factor 4 (AHRD V1 *-*- ERF78_ARATH)%3B contains Interpro domain(s) IPR001471 Pathogenesis-related transcriptional factor and ERF%2C DNA-binding //	GO:0003677//	DNA binding//	molecular_function//
XLOC_003123	Solyc01g008180.2	SL2.50ch01:2327764-2334359	-0.596524	0	0	DNA-binding protein (Fragment) (AHRD V1 *--* Q42051_ARATH)%3B contains Interpro domain(s) IPR005516 Remorin%2C C-terminal region //	GO:0003677//	DNA binding//	molecular_function//
XLOC_021707	Solyc07g041190.2	SL2.50ch07:51976200-51980216	-0.689891	0	0	PHD finger family protein (AHRD V1 **-- D7M017_ARALY)%3B contains Interpro domain(s) IPR019787 Zinc finger%2C PHD-finger //	GO:0003677//	DNA binding//	molecular_function//
XLOC_028168	Solyc10g050970.1	SL2.50ch10:51274678-51275350	2.897	0	0	Ethylene responsive transcription factor 2b (AHRD V1 *-*- C0J9I6_9ROSA)%3B contains Interpro domain(s) IPR001471 Pathogenesis-related transcriptional factor and ERF%2C DNA-binding //	GO:0003677//	DNA binding//	molecular_function//
XLOC_026414	Solyc09g010810.2	SL2.50ch09:4096963-4103593	-0.974282	0	0	Kinesin-like protein (AHRD V1 ***- Q8L7B8_ARATH)%3B contains Interpro domain(s) IPR001752 Kinesin%2C motor region //	GO:0003677//	DNA binding//	molecular_function//
XLOC_016035	Solyc05g009890.1	SL2.50ch05:4112337-4113699	-1.19697	0	0	Chloroplast nucleoid DNA binding protein-like (AHRD V1 **-* Q9LTW4_ARATH)%3B contains Interpro domain(s) IPR001461 Peptidase A1 //	GO:0003677//	DNA binding//	molecular_function//
XLOC_015115	Solyc05g016310.1	SL2.50ch05:15493539-15495120	1.89207	0	0	Aspartic proteinase nepenthesin I (AHRD V1 **-- A9ZMF9_NEPAL)%3B contains Interpro domain(s) IPR001461 Peptidase A1 //	GO:0003677//	DNA binding//	molecular_function//
XLOC_016789	Solyc05g052030.1	SL2.50ch05:62370328-62370934	0	-1.34666	0	Ethylene responsive transcription factor 1a (AHRD V1 *-*- C0J9I9_9ROSA)%3B contains Interpro domain(s) IPR001471 Pathogenesis-related transcriptional factor and ERF%2C DNA-binding //	GO:0003677//	DNA binding//	molecular_function//
XLOC_024746	Solyc08g080540.2	SL2.50ch08:63819652-63821278	0	0	0.731329	Heat stress transcription factor (AHRD V1 *-** D4QAU8_CARPA)%3B contains Interpro domain(s) IPR000232 Heat shock factor (HSF)-type%2C DNA-binding //	GO:0003677//	DNA binding//	molecular_function//
XLOC_022025	Solyc07g054220.1	SL2.50ch07:62574141-62575314	-0.976342	0	0	Ethylene responsive transcription factor 2a (AHRD V1 *-*- C0J9I7_9ROSA)%3B contains Interpro domain(s) IPR001471 Pathogenesis-related transcriptional factor and ERF%2C DNA-binding //	GO:0003677//	DNA binding//	molecular_function//
XLOC_022113	Solyc07g055710.2	SL2.50ch07:63648887-63650452	0.809582	-0.956617	0	Heat stress transcription factor A3 (AHRD V1 *-*- D1M7W9_SOLLC)%3B contains Interpro domain(s) IPR000232 Heat shock factor (HSF)-type%2C DNA-binding //	GO:0003677//	DNA binding//	molecular_function//
XLOC_008217	Solyc02g090820.2	SL2.50ch02:52302274-52305532	0.559562	0	0	Heat stress transcription factor (AHRD V1 **** D4QAU8_CARPA)%3B contains Interpro domain(s) IPR000232 Heat shock factor (HSF)-type%2C DNA-binding //	GO:0003677//	DNA binding//	molecular_function//
XLOC_004272	Solyc01g094370.2	SL2.50ch01:85880783-85884625	0	0	-0.565166	Remorin 2 (AHRD V1 ***- Q9XEX9_SOLLC)%3B contains Interpro domain(s) IPR005516 Remorin%2C C-terminal region //	GO:0003677//	DNA binding//	molecular_function//
XLOC_019214	Solyc06g063070.2	SL2.50ch06:39817160-39819912	0	-0.5992	-0.804405	Ethylene responsive transcription factor 2a (AHRD V1 ***- C0J9I7_9ROSA)%3B contains Interpro domain(s) IPR001471 Pathogenesis-related transcriptional factor and ERF%2C DNA-binding //	GO:0003677//	DNA binding//	molecular_function//
XLOC_002780	Solyc01g108240.2	SL2.50ch01:95607486-95608774	3.25286	0	0	Ethylene responsive transcription factor 2b (AHRD V1 *-*- C0J9I6_9ROSA)%3B contains Interpro domain(s) IPR001471 Pathogenesis-related transcriptional factor and ERF%2C DNA-binding //	GO:0003677//	DNA binding//	molecular_function//
XLOC_002492	Solyc01g102340.2	SL2.50ch01:91165027-91167137	1.14348	0	0	Myb-like transcription factor (AHRD V1 *--- B8XPP3_9ROSI)%3B contains Interpro domain(s) IPR015495 Myb transcription factor //	GO:0003677//	DNA binding//	molecular_function//
XLOC_025029	Solyc09g007260.2	SL2.50ch09:856614-859952	0	0	-0.739676	AP2-like ethylene-responsive transcription factor At1g79700 (AHRD V1 *--- AP2L3_ARATH)%3B contains Interpro domain(s) IPR001471 Pathogenesis-related transcriptional factor and ERF%2C DNA-binding //	GO:0003677//	DNA binding//	molecular_function//
XLOC_024043	Solyc08g045640.2	SL2.50ch08:17804101-17806882	-0.601037	0	0	DNA-binding protein (Fragment) (AHRD V1 *--* Q42051_ARATH)%3B contains Interpro domain(s) IPR005516 Remorin%2C C-terminal region //	GO:0003677//	DNA binding//	molecular_function//
XLOC_032402	Solyc11g072600.1	SL2.50ch11:55773655-55776852	0	0	-0.710049	AP2-like ethylene-responsive transcription factor At1g79700 (AHRD V1 *--- AP2L3_ARATH)%3B contains Interpro domain(s) IPR001471 Pathogenesis-related transcriptional factor and ERF%2C DNA-binding //	GO:0003677//	DNA binding//	molecular_function//
XLOC_026331	Solyc09g009100.2	SL2.50ch09:2443072-2448148	0.668924	-0.753749	0	Heat stress transcription factor A3 (AHRD V1 ***- D1M7W9_SOLLC)%3B contains Interpro domain(s) IPR000232 Heat shock factor (HSF)-type%2C DNA-binding //	GO:0003677//	DNA binding//	molecular_function//
XLOC_031118	Solyc11g068480.1	SL2.50ch11:53191215-53194134	-1.06241	0	0	DNA polymerase epsilon subunit 3 (AHRD V1 *-*- B6TCI2_MAIZE)%3B contains Interpro domain(s) IPR003958 Transcription factor CBF/NF-Y/archaeal histone //	GO:0003677//	DNA binding//	molecular_function//
XLOC_024434	Solyc08g068870.2	SL2.50ch08:57941820-57944501	0.987352	-0.596777	0.623383	Aspartic proteinase nepenthesin-1 (AHRD V1 **-- C0JAB4_ORYCO)%3B contains Interpro domain(s) IPR001461 Peptidase A1 //	GO:0003677//	DNA binding//	molecular_function//
XLOC_034646	Solyc12g056510.1	SL2.50ch12:62444839-62447203	-0.573229	0	0	GT-2 factor (Fragment) (AHRD V1 *--- Q8W240_SOYBN)%3B contains Interpro domain(s) IPR017877 MYB-like //	GO:0003677//	DNA binding//	molecular_function//
XLOC_011891	Solyc04g005600.1	SL2.50ch04:395649-396932	-1.80587	0	0	MYB transcription factor (AHRD V1 *--- Q6R098_ARATH)%3B contains Interpro domain(s) IPR015495 Myb transcription factor //	GO:0003677//	DNA binding//	molecular_function//
XLOC_030335	Solyc11g010710.1	SL2.50ch11:3758646-3764093	-1.30682	0	0	AP2-like ethylene-responsive transcription factor At1g16060 (AHRD V1 *-*- AP2L1_ARATH)%3B contains Interpro domain(s) IPR001471 Pathogenesis-related transcriptional factor and ERF%2C DNA-binding //	GO:0003677//	DNA binding//	molecular_function//
XLOC_030384	Solyc11g011740.1	SL2.50ch11:4715456-4715987	1.35501	0	1.43423	Ethylene-responsive transcription factor 2 (AHRD V1 *-*- B6U860_MAIZE)%3B contains Interpro domain(s) IPR001471 Pathogenesis-related transcriptional factor and ERF%2C DNA-binding //	GO:0003677//	DNA binding//	molecular_function//
XLOC_031241	Solyc11g072060.1	SL2.50ch11:55338168-55344460	-2.06347	0	0	MYB transcription factor (AHRD V1 *--- Q9FR97_ARATH)%3B contains Interpro domain(s) IPR015495 Myb transcription factor //	GO:0003677//	DNA binding//	molecular_function//
XLOC_012196	Solyc04g015520.2	SL2.50ch04:5728589-5731134	0.668931	0	0.799149	DNA binding protein (AHRD V1 **** B6TND2_MAIZE)%3B contains Interpro domain(s) IPR005516 Remorin%2C C-terminal region //	GO:0003677//	DNA binding//	molecular_function//
XLOC_020746	Solyc07g053230.2	SL2.50ch07:61699379-61700488	0.855246	0	0	Myb-related transcription factor (AHRD V1 *--- B5RHV2_MUSBA)%3B contains Interpro domain(s) IPR015495 Myb transcription factor //	GO:0003677//	DNA binding//	molecular_function//
XLOC_028519	Solyc10g080920.1	SL2.50ch10:62102162-62103898	2.77474	0	1.45464	Myb family transcription factor (Fragment) (AHRD V1 ***- D7KSM0_ARALY)%3B contains Interpro domain(s) IPR017884 SANT%2C eukarya //	GO:0003677//	DNA binding//	molecular_function//
XLOC_008559	Solyc03g006320.1	SL2.50ch03:924277-924928	-1.65349	0	0	Ethylene-responsive transcription factor 4 (AHRD V1 *-*- B6THY5_MAIZE)%3B contains Interpro domain(s) IPR001471 Pathogenesis-related transcriptional factor and ERF%2C DNA-binding //	GO:0003677//	DNA binding//	molecular_function//
XLOC_008545	Solyc03g006000.2	SL2.50ch03:676015-680008	0.539383	0	0	Heat stress transcription factor A3 (AHRD V1 *-*- D1M7W9_SOLLC)%3B contains Interpro domain(s) IPR000232 Heat shock factor (HSF)-type%2C DNA-binding //	GO:0003677//	DNA binding//	molecular_function//
XLOC_010102	Solyc03g123590.2	SL2.50ch03:70399403-70402725	-1.58752	0	0	Remorin family protein (AHRD V1 ***- D7KLC3_ARALY)%3B contains Interpro domain(s) IPR005516 Remorin%2C C-terminal region //	GO:0003677//	DNA binding//	molecular_function//
XLOC_033116	Solyc12g044610.1	SL2.50ch12:38223436-38230947	0	0	0.510684	Myb transcription factor (AHRD V1 ***- B1Q4U5_9ROSI)%3B contains Interpro domain(s) IPR006447 Myb-like DNA-binding region%2C SHAQKYF class //	GO:0003677//	DNA binding//	molecular_function//
XLOC_030007	Solyc10g086250.1	SL2.50ch10:65133153-65134995	1.06884	0	1.20678	MYB transcription factor (AHRD V1 **-- A9YY82_SOLTU)%3B contains Interpro domain(s) IPR015495 Myb transcription factor //	GO:0003677//	DNA binding//	molecular_function//
XLOC_014282	Solyc04g077490.2	SL2.50ch04:62429314-62432703	0	0.517658	0	AP2-like ethylene-responsive transcription factor At1g16060 (AHRD V1 *-*- AP2L1_ARATH)%3B contains Interpro domain(s) IPR001471 Pathogenesis-related transcriptional factor and ERF%2C DNA-binding //	GO:0003677//	DNA binding//	molecular_function//
XLOC_029798	Solyc10g081050.1	SL2.50ch10:62229880-62235646	0	0	0.739933	Phage-related exonuclease (AHRD V1 *-*- C6ADF2_BARGA)%3B contains Interpro domain(s) IPR017482 Putative phage-type endonuclease //	GO:0003677//	DNA binding//	molecular_function//
XLOC_010096	Solyc03g123500.2	SL2.50ch03:70333119-70335603	0	0	-0.795545	Ethylene responsive transcription factor 2a (AHRD V1 ***- C0J9I7_9ROSA)%3B contains Interpro domain(s) IPR001471 Pathogenesis-related transcriptional factor and ERF%2C DNA-binding //	GO:0003677//	DNA binding//	molecular_function//
XLOC_018821	Solyc06g035920.2	SL2.50ch06:25270355-25277247	0	0	-0.55135	Remorin 1 (AHRD V1 ***- Q9XEX8_SOLLC)%3B contains Interpro domain(s) IPR005516 Remorin%2C C-terminal region //	GO:0003677//	DNA binding//	molecular_function//
XLOC_012506	Solyc04g049800.2	SL2.50ch04:43567202-43569733	0	0	1.18027	AP2-like ethylene-responsive transcription factor At1g79700 (AHRD V1 *--- AP2L3_ARATH)%3B contains Interpro domain(s) IPR001471 Pathogenesis-related transcriptional factor and ERF%2C DNA-binding //	GO:0003677//	DNA binding//	molecular_function//
XLOC_004274	Solyc01g094460.2	SL2.50ch01:85928924-85934636	-0.690997	0	0	AT-hook motif nuclear localized protein 1 (AHRD V1 ***- O04696_PEA)%3B contains Interpro domain(s) IPR005175 Protein of unknown function DUF296 //	GO:0003677//	DNA binding//	molecular_function//
XLOC_025116	Solyc09g008940.2	SL2.50ch09:2333256-2337500	-0.814095	0	0	AT-hook motif nuclear localized protein 1 (AHRD V1 *-*- Q8VYJ2_ARATH)%3B contains Interpro domain(s) IPR005175 Protein of unknown function DUF296 //	GO:0003677//	DNA binding//	molecular_function//
XLOC_030122	Solyc11g005380.1	SL2.50ch11:304293-305925	1.36683	-0.606278	0	GT-2 factor (Fragment) (AHRD V1 *--- Q8W240_SOYBN)%3B contains Interpro domain(s) IPR017877 MYB-like //	GO:0003677//	DNA binding//	molecular_function//
XLOC_008784	Solyc03g034150.1	SL2.50ch03:5843768-5845519	0	0	inf	Homeobox leucine zipper protein (AHRD V1 *-*- B7E8X8_ORYSJ)%3B contains Interpro domain(s) IPR001356 Homeobox //	GO:0003677//	DNA binding//	molecular_function//
XLOC_029915	Solyc10g084370.1	SL2.50ch10:63939390-63944370	0	0	0.766043	MYB transcription factor (Fragment) (AHRD V1 **-- A1DR87_CATRO)%3B contains Interpro domain(s) IPR006447 Myb-like DNA-binding region%2C SHAQKYF class //	GO:0003677//	DNA binding//	molecular_function//
XLOC_014768	Solyc05g007690.1	SL2.50ch05:2182006-2184191	-2.71303	0	0	MYB transcription factor (AHRD V1 *--- Q6R098_ARATH)%3B contains Interpro domain(s) IPR015495 Myb transcription factor //	GO:0003677//	DNA binding//	molecular_function//
XLOC_001198	Solyc01g010910.1	SL2.50ch01:6437227-6440525	-1.34284	0	-0.856043	MYB transcription factor (AHRD V1 *-*- Q6R098_ARATH)%3B contains Interpro domain(s) IPR015495 Myb transcription factor //	GO:0003677//	DNA binding//	molecular_function//
XLOC_019336	Solyc06g066540.1	SL2.50ch06:41797599-41798178	-0.826263	0	0	Ethylene-responsive transcription factor 13 (AHRD V1 *-*- ERF99_ARATH)%3B contains Interpro domain(s) IPR001471 Pathogenesis-related transcriptional factor and ERF%2C DNA-binding //	GO:0003677//	DNA binding//	molecular_function//
XLOC_031288	Solyc11g073120.1	SL2.50ch11:56213616-56215242	1.65492	0	1.55968	MYB transcription factor (AHRD V1 *-*- Q56UT4_ORYSJ)%3B contains Interpro domain(s) IPR015495 Myb transcription factor //	GO:0003677//	DNA binding//	molecular_function//
XLOC_033080	Solyc12g049350.1	SL2.50ch12:37018582-37021252	0	0.899462	0	Myb 12 transcription factor (AHRD V1 ***- D2EBC3_9SOLN)%3B contains Interpro domain(s) IPR015495 Myb transcription factor //	GO:0003677//	DNA binding//	molecular_function//
XLOC_013059	Solyc04g079360.1	SL2.50ch04:63888687-63889446	0	0.656262	-0.961021	MYB transcription factor (AHRD V1 *-*- O23160_ARATH)%3B contains Interpro domain(s) IPR015495 Myb transcription factor //	GO:0003677//	DNA binding//	molecular_function//
XLOC_013028	Solyc04g078770.2	SL2.50ch04:63443215-63444533	-0.836639	0	0	Heat stress transcription factor (AHRD V1 *-*- D4QAU8_CARPA)%3B contains Interpro domain(s) IPR000232 Heat shock factor (HSF)-type%2C DNA-binding //	GO:0003677//	DNA binding//	molecular_function//
XLOC_014442	Solyc04g080790.2	SL2.50ch04:64871065-64875337	0	0	0.684512	BEL1-like homeodomain protein 3 (AHRD V1 *--- BLH3_ARATH)%3B contains Interpro domain(s) IPR006563 POX //	GO:0003677//	DNA binding//	molecular_function//
XLOC_007576	Solyc02g077370.1	SL2.50ch02:42323149-42323635	1.94682	0	0	Ethylene-responsive transcription factor 2 (AHRD V1 ***- B6SSU7_MAIZE)%3B contains Interpro domain(s) IPR001471 Pathogenesis-related transcriptional factor and ERF%2C DNA-binding //	GO:0003677//	DNA binding//	molecular_function//
XLOC_023434	Solyc08g078190.1	SL2.50ch08:62026454-62027423	0	0	-0.807442	Ethylene responsive transcription factor 1a (AHRD V1 *-*- C0J9I9_9ROSA)%3B contains Interpro domain(s) IPR001471 Pathogenesis-related transcriptional factor and ERF%2C DNA-binding //	GO:0003677//	DNA binding//	molecular_function//
XLOC_009984	Solyc03g120230.2	SL2.50ch03:68688212-68693362	-0.639498	0	0	MAR-binding filament-like protein 1 (AHRD V1 **** MFP1_SOLLC)%3B contains Interpro domain(s) IPR009053 Prefoldin //	GO:0003677//	DNA binding//	molecular_function//
XLOC_007857	Solyc02g083610.2	SL2.50ch02:46955865-46959236	-1.54256	0	0	BZIP transcription factor (AHRD V1 *-*- D3YBE4_TRIRP)%3B contains Interpro domain(s) IPR006867 Protein of unknown function DUF632 //	GO:0003677//	DNA binding//	molecular_function//
XLOC_022513	Solyc08g005870.1	SL2.50ch08:660680-662383	-2.44836	1.02478	0	MYB transcription factor (AHRD V1 *--- D0VYJ9_DIOKA)%3B contains Interpro domain(s) IPR015495 Myb transcription factor //	GO:0003677//	DNA binding//	molecular_function//
XLOC_006312	Solyc02g085630.2	SL2.50ch02:48463075-48465051	0	0.895314	0	Homeobox-leucine zipper-like protein (AHRD V1 *-*- Q3HRT1_PICGL)%3B contains Interpro domain(s) IPR001356 Homeobox //	GO:0003677//	DNA binding//	molecular_function//
XLOC_024393	Solyc08g068100.2	SL2.50ch08:57173560-57182360	-0.830114	0	0	Bzip-like transcription factor-like (AHRD V1 **-- Q7X997_ORYSJ)%3B contains Interpro domain(s) IPR006867 Protein of unknown function DUF632 //	GO:0003677//	DNA binding//	molecular_function//
XLOC_030449	Solyc11g012980.1	SL2.50ch11:5825004-5825664	4.06636	0	0	Ethylene-responsive transcription factor 9 (AHRD V1 *-*- ERF80_ARATH)%3B contains Interpro domain(s) IPR001471 Pathogenesis-related transcriptional factor and ERF%2C DNA-binding //	GO:0003677//	DNA binding//	molecular_function//
XLOC_013911	Solyc04g051490.2	SL2.50ch04:50608293-50621199	1.92133	0	0	Essential meiotic endonuclease 1B (AHRD V1 *-*- C5H8J1_ARATH)%3B contains Interpro domain(s) IPR006166 DNA repair nuclease%2C XPF-type/Helicase //	GO:0006259//	DNA metabolic process//	biological_process//
XLOC_027524	Solyc10g005040.2	SL2.50ch10:47926-49272	1.01763	0	0	Harpin-induced protein-like (Fragment) (AHRD V1 **-- D2CFH8_COFAR)%3B contains Interpro domain(s) IPR010847 Harpin-induced 1 //	GO:0032776//	DNA methylation on cytosine//	biological_process//
XLOC_009851	Solyc03g117510.2	SL2.50ch03:66649399-66654514	-1.33561	0	0	Formamidopyrimidine-DNA glycosylase (AHRD V1 **** C5JTH8_AJEDS)%3B contains Interpro domain(s) IPR000191 DNA glycosylase/AP lyase //	GO:0019104//	DNA N-glycosylase activity//	molecular_function//
XLOC_024705	Solyc08g079530.2	SL2.50ch08:63040476-63043995	0	0	0.599115	Deoxyribodipyrimidine photolyase (AHRD V1 **** D6SS50_9DELT)%3B contains Interpro domain(s) IPR008148 DNA photolyase%2C class 2 //	GO:0003913//	DNA photolyase activity//	molecular_function//
XLOC_011225	Solyc03g111680.2	SL2.50ch03:62316787-62323654	-1.21921	0.636172	0.832893	DNA polymerase III gamma/tau subunit (AHRD V1 *-*- B0JGE9_MICAN)%3B contains Interpro domain(s) IPR012763 DNA polymerase III%2C subunit gamma/ tau //	GO:0009360//	DNA polymerase III complex//	cellular_component//
XLOC_012452	Solyc04g045530.2	SL2.50ch04:33716329-33725661	-1.06025	0	0	DNA primase large subunit (AHRD V1 **** B5X2T9_SALSA)%3B contains Interpro domain(s) IPR016558 DNA primase%2C large subunit%2C eukaryotic //	GO:0003896//	DNA primase activity//	molecular_function//
XLOC_023642	Solyc08g082200.2	SL2.50ch08:65047440-65053493	-1.28236	0	0	DNA primase (AHRD V1 **** B6T4S3_MAIZE)%3B contains Interpro domain(s) IPR014052 DNA primase%2C small subunit%2C eukaryotic and archaeal //	GO:0003896//	DNA primase activity//	molecular_function//
XLOC_033151	Solyc12g042910.1	SL2.50ch12:39515199-39521154	0.644191	1.0936	1.91567	Cryptochrome-like protein 1 (AHRD V1 ***- Q5IFN1_OSTTA)%3B contains Interpro domain(s) IPR005101 DNA photolyase%2C FAD-binding/Cryptochrome%2C C-terminal //	GO:0006281//	DNA repair//	biological_process//
XLOC_029224	Solyc10g044780.1	SL2.50ch10:27752443-27760694	-0.641525	0	0	Cell cycle checkpoint control protein family (AHRD V1 **-- D7L3V1_ARALY)%3B contains Interpro domain(s) IPR007268 Rad9 //	GO:0006281//	DNA repair//	biological_process//
XLOC_014815	Solyc05g008540.2	SL2.50ch05:2865323-2871899	-1.20186	0	0	Origin recognition complex 4 subunit (AHRD V1 **** Q6EWX1_ARATH)%3B contains Interpro domain(s) IPR016527 Origin recognition complex%2C subunit 4 //	GO:0003688//	DNA replication origin binding//	molecular_function//
XLOC_015628	Solyc05g053100.2	SL2.50ch05:63216914-63224633	-0.852899	0	-0.817124	Dihydrolipoyl dehydrogenase (AHRD V1 ***- B9RZN2_RICCO)%3B contains Interpro domain(s) IPR006258 Dihydrolipoamide dehydrogenase //	GO:0003916//	DNA topoisomerase activity//	molecular_function//
XLOC_004082	Solyc01g087500.2	SL2.50ch01:82445099-82451976	-1.32987	0	0	DNA topoisomerase 2 (AHRD V1 **** Q8GSC4_TOBAC)%3B contains Interpro domain(s) IPR001241 DNA topoisomerase%2C type IIA%2C subunit B or N-terminal //	GO:0003918//	DNA topoisomerase type II (ATP-hydrolyzing) activity//	molecular_function//
XLOC_007630	Solyc02g078390.2	SL2.50ch02:43086572-43091821	-0.610756	0	0	MutS2 protein (AHRD V1 ***- B0JH18_MICAN)%3B contains Interpro domain(s) IPR005747 DNA mismatch repair protein MutS%2C type 2 //	GO:0045005//	DNA-dependent DNA replication maintenance of fidelity//	biological_process//
XLOC_010240	Solyc03g007370.2	SL2.50ch03:1915091-1920265	0	0	1.16298	RNA polymerase sigma factor (AHRD V1 *-** C7QR23_CYAP0)%3B contains Interpro domain(s) IPR013325 RNA polymerase sigma factor%2C region 2 //	GO:0003899//	DNA-directed RNA polymerase activity//	molecular_function//
XLOC_031002	Solyc11g065090.1	SL2.50ch11:50390004-50396459	0.888464	0	0.599015	DUF803 domain membrane protein (AHRD V1 **-- B8MZ64_ASPFN)%3B contains Interpro domain(s) IPR008521 Protein of unknown function DUF803 //	GO:0005665//	DNA-directed RNA polymerase II, core complex//	cellular_component//
XLOC_012237	Solyc04g016290.2	SL2.50ch04:7074882-7078461	-0.91885	0	0	Unknown Protein (AHRD V1)%3B contains Interpro domain(s) IPR011112 Rho termination factor%2C N-terminal //	GO:0006353//	DNA-templated transcription, termination//	biological_process//
XLOC_019043	Solyc06g053670.1	SL2.50ch06:36510254-36510974	0	-0.646253	0	Enoyl-CoA hydratase/isomerase family protein (AHRD V1 **** D7MH17_ARALY)%3B contains Interpro domain(s) IPR001753 Crotonase%2C core //	GO:0004165//	dodecenoyl-CoA delta-isomerase activity//	molecular_function//
XLOC_005502	Solyc02g062570.2,Solyc02g062580.2	SL2.50ch02:34298080-34305572	0	0	0.916937	Dolichyldiphosphatase 1 (AHRD V1 **-* C1C1U9_9MAXI)%3B contains Interpro domain(s) IPR000326 Phosphatidic acid phosphatase type 2/haloperoxidase //Dolichyldiphosphatase 1 (AHRD V1 *--- C1C1U9_9MAXI)%3B contains Interpro domain(s) IPR000326 Phosphatidic acid phosphatase type 2/haloperoxidase //	GO:0047874//GO:0016020//	dolichyldiphosphatase activity//membrane//	molecular_function//cellular_component//
XLOC_021314	Solyc07g008470.2	SL2.50ch07:3375700-3379146	0	0	0.811927	Macrophage migration inhibitory factor family protein (AHRD V1 ***- D7MMS4_ARALY)%3B contains Interpro domain(s) IPR001398 Macrophage migration inhibitory factor //	GO:0004167//	dopachrome isomerase activity//	molecular_function//
XLOC_028025	Solyc10g047130.1	SL2.50ch10:39862815-39868770	-0.697356	0	0	RNA-binding protein RZ-1 (AHRD V1 **** D0V0M9_CAPAN)%3B contains Interpro domain(s) IPR015465 RNA recognition motif%2C glycine rich protein //	GO:0003690//	double-stranded DNA binding//	molecular_function//
XLOC_002425	Solyc01g100030.2	SL2.50ch01:90108999-90110385	-1.42652	0	0	Deoxyuridine 5%26apos-triphosphate nucleotidohydrolase (AHRD V1 ***- D0NVQ2_PHYIN)%3B contains Interpro domain(s) IPR008181 DeoxyUTP pyrophosphatase subfamily 1 //	GO:0046080//	dUTP metabolic process//	biological_process//
XLOC_002323	Solyc01g097970.2	SL2.50ch01:88623377-88624528	-1.24971	0	0	Deoxyuridine 5%26apos-triphosphate nucleotidohydrolase (AHRD V1 ***- C1E7B9_9CHLO)%3B contains Interpro domain(s) IPR008181 DeoxyUTP pyrophosphatase subfamily 1 //	GO:0046080//	dUTP metabolic process//	biological_process//
XLOC_018816	Solyc06g035870.2	SL2.50ch06:25115573-25117598	0	0	-0.549476	Membrane-associated progesterone receptor component 1 (AHRD V1 *-*- C1GTL6_PARBA)%3B contains Interpro domain(s) IPR001199 Cytochrome b5 //	GO:0035100//	ecdysone binding//	molecular_function//
XLOC_006914	Solyc02g022850.1	SL2.50ch02:24208545-24210171	0.750396	0	0	FAD-binding domain-containing protein (AHRD V1 **-- D7MFH8_ARALY)%3B contains Interpro domain(s) IPR006094 FAD linked oxidase%2C N-terminal //	GO:0009055//	electron carrier activity//	molecular_function//
XLOC_001992	Solyc01g088170.2	SL2.50ch01:83031724-83041944	0	0	0.504727	Aldehyde oxidase (AHRD V1 ***- Q9FV24_SOLLC)%3B contains Interpro domain(s) IPR002346 Molybdopterin dehydrogenase%2C FAD-binding //	GO:0009055//	electron carrier activity//	molecular_function//
XLOC_004257	Solyc01g094040.2	SL2.50ch01:85611706-85614120	0.690744	0	0	Plastocyanin-like domain containing protein expressed (AHRD V1 **-- Q2QRP3_ORYSJ)%3B contains Interpro domain(s) IPR003245 Plastocyanin-like //	GO:0009055//	electron carrier activity//	molecular_function//
XLOC_004680	Solyc01g104400.2	SL2.50ch01:92774873-92777517	-1.0911	0	-0.545443	Blue copper protein (AHRD V1 **-- B6U7P6_MAIZE)%3B contains Interpro domain(s) IPR003245 Plastocyanin-like //	GO:0009055//	electron carrier activity//	molecular_function//
XLOC_031665	Solyc11g013810.1	SL2.50ch11:7173711-7178176	0	0	1.37152	Nitrate reductase (AHRD V1 ***- Q8LT13_SOLTU)%3B contains Interpro domain(s) IPR012137 Nitrate reductase NADH dependant //	GO:0009055//	electron carrier activity//	molecular_function//
XLOC_034021	Solyc12g013900.1	SL2.50ch12:4704878-4706762	-0.614541	0	0	CT099 (Fragment) (AHRD V1 **-- Q30GX2_SOLPI)%3B contains Interpro domain(s) IPR003245 Plastocyanin-like //	GO:0009055//	electron carrier activity//	molecular_function//
XLOC_032110	Solyc11g062350.1	SL2.50ch11:49311968-49313762	1.0223	0	0	Plastocyanin-like domain containing protein expressed (AHRD V1 **-- Q2QRP3_ORYSJ)%3B contains Interpro domain(s) IPR003245 Plastocyanin-like //	GO:0009055//	electron carrier activity//	molecular_function//
XLOC_024334	Solyc08g066740.2	SL2.50ch08:55558720-55559834	1.42165	0.917595	0	CT099 (Fragment) (AHRD V1 *--- Q4KR02_SOLCI)%3B contains Interpro domain(s) IPR003245 Plastocyanin-like //	GO:0009055//	electron carrier activity//	molecular_function//
XLOC_026024	Solyc09g090570.2	SL2.50ch09:70060480-70066160	0	0	1.19253	Proton gradient regulation 5 (AHRD V1 ***- B0F831_CUCSA)//	GO:0009055//	electron carrier activity//	molecular_function//
XLOC_018470	Solyc06g084450.2	SL2.50ch06:49552406-49554254	-1.41287	0.833954	0	Rho GTPase activating protein 2 (AHRD V1 ***- Q6UQ72_ORYSJ)%3B contains Interpro domain(s) IPR000198 RhoGAP //	GO:0009055//	electron carrier activity//	molecular_function//
XLOC_032181	Solyc11g065930.1	SL2.50ch11:51514221-51535412	0	0	-0.922931	Xanthine dehydrogenase/oxidase (AHRD V1 ***- A9YL93_RABIT)%3B contains Interpro domain(s) IPR016208 Aldehyde oxidase/xanthine dehydrogenase //	GO:0009055//	electron carrier activity//	molecular_function//
XLOC_023790	Solyc08g006790.2	SL2.50ch08:1346645-1348052	-1.90542	0.688657	0	Early nodulin-55-1 (Fragment) (AHRD V1 *--- NO551_SOYBN)%3B contains Interpro domain(s) IPR003245 Plastocyanin-like //	GO:0009055//	electron carrier activity//	molecular_function//
XLOC_023303	Solyc08g075240.2	SL2.50ch08:59371026-59376613	-1.89121	0	-0.568314	Glucose-methanol-choline oxidoreductase (AHRD V1 ***- D6TF66_9CHLR)%3B contains Interpro domain(s) IPR012400 Long-chain fatty alcohol dehydrogenase //	GO:0009055//	electron carrier activity//	molecular_function//
XLOC_014501	Solyc04g082010.1	SL2.50ch04:65817329-65826806	-1.13703	0	0	Plastocyanin (AHRD V1 ***- Q0W9E5_SOLCO)%3B contains Interpro domain(s) IPR000923 Blue (type 1) copper domain //	GO:0009055//	electron carrier activity//	molecular_function//
XLOC_026012	Solyc09g090350.2	SL2.50ch09:69858939-69863894	0	0	-0.603952	Oxidoreductase (AHRD V1 ***- B6SXM3_MAIZE)%3B contains Interpro domain(s) IPR012400 Long-chain fatty alcohol dehydrogenase //	GO:0009055//	electron carrier activity//	molecular_function//
XLOC_023738	Solyc08g005630.2	SL2.50ch08:487544-495698	-0.600435	0	0	Glucose-methanol-choline oxidoreductase (AHRD V1 ***- D6TF66_9CHLR)%3B contains Interpro domain(s) IPR012400 Long-chain fatty alcohol dehydrogenase //	GO:0009055//	electron carrier activity//	molecular_function//
XLOC_021293	Solyc07g008140.2	SL2.50ch07:2848063-2849548	1.61039	0	1.11694	Blue copper protein (Fragment) (AHRD V1 *--- O82576_MAIZE)%3B contains Interpro domain(s) IPR003245 Plastocyanin-like //	GO:0009055//	electron carrier activity//	molecular_function//
XLOC_028335	Solyc10g075160.1	SL2.50ch10:58886262-58886697	-0.949329	0	0	Ferredoxin I (AHRD V1 ***- Q93XJ9_SOLTU)%3B contains Interpro domain(s) IPR010241 Ferredoxin [2Fe-2S]%2C plant //	GO:0009055//	electron carrier activity//	molecular_function//
XLOC_031115	Solyc11g068430.1	SL2.50ch11:53151445-53155187	-1.31325	0	-0.888344	Ferredoxin (AHRD V1 ***- Q9AUE1_IMPBA)%3B contains Interpro domain(s) IPR010241 Ferredoxin [2Fe-2S]%2C plant //	GO:0009055//	electron carrier activity//	molecular_function//
XLOC_009171	Solyc03g078720.2,Solyc03g078730.1	SL2.50ch03:51426714-51428119	0	0	1.36456	Glucosyltransferase-2 (AHRD V1 ***- Q8S9A7_PHAAN)%3B contains Interpro domain(s) IPR002213 UDP-glucuronosyl/UDP-glucosyltransferase //UDP-glucuronosyltransferase (AHRD V1 **** Q8L5C7_PEA)%3B contains Interpro domain(s) IPR002213 UDP-glucuronosyl/UDP-glucosyltransferase //	GO:0009055//GO:0015020//	electron carrier activity//glucuronosyltransferase activity//	molecular_function//molecular_function//
XLOC_025633	Solyc09g061230.2	SL2.50ch09:58380564-58383536	0	0	-0.896883	Cytochrome b5 (AHRD V1 **** Q9ZWT2_ARATH)%3B contains Interpro domain(s) IPR001199 Cytochrome b5 //	GO:0045153//	electron transporter, transferring electrons within CoQH2-cytochrome c reductase complex activity//	molecular_function//
XLOC_018428	Solyc06g083440.2	SL2.50ch06:48844658-48846744	-1.21903	0	-0.885776	Cytochrome b5 reductase (AHRD V1 *-** Q54XV1_DICDI)%3B contains Interpro domain(s) IPR001199 Cytochrome b5 //	GO:0045153//	electron transporter, transferring electrons within CoQH2-cytochrome c reductase complex activity//	molecular_function//
XLOC_014321	Solyc04g078140.2,Solyc04g078150.2	SL2.50ch04:62958233-62973619	0.772781	0	0	Cytochrome B5 (AHRD V1 **** Q9ZSP7_PETHY)%3B contains Interpro domain(s) IPR001199 Cytochrome b5 //Unknown Protein (AHRD V1)//	GO:0045153//no GOid	electron transporter, transferring electrons within CoQH2-cytochrome c reductase complex activity//no GOterm//	molecular_function//no GO_branch//
XLOC_012942	Solyc04g077190.2	SL2.50ch04:62114949-62122401	0	-0.567687	0	Endo-1 4-beta-xylanase (AHRD V1 *-** B6SW51_MAIZE)%3B contains Interpro domain(s) IPR013781 Glycoside hydrolase%2C subgroup%2C catalytic core //	GO:0031176//	endo-1,4-beta-xylanase activity//	molecular_function//
XLOC_006189	Solyc02g082920.2	SL2.50ch02:46550981-46552140	1.74362	-1.16615	0	Endochitinase (Chitinase) (AHRD V1 **** Q43184_SOLTU)%3B contains Interpro domain(s) IPR000726 Glycoside hydrolase%2C family 19%2C catalytic //	GO:0008843//	endochitinase activity//	molecular_function//
XLOC_021153	Solyc07g005090.2	SL2.50ch07:113979-115328	0.758222	0	0	Chitinase A (AHRD V1 ***- Q4W6L6_CYCRE)%3B contains Interpro domain(s) IPR011583 Chitinase II //	GO:0008843//	endochitinase activity//	molecular_function//
XLOC_014116	Solyc04g072000.2	SL2.50ch04:59066372-59068261	1.95683	0	0	Chitinase (AHRD V1 ***- D0QU15_LACSA)%3B contains Interpro domain(s) IPR016283 Glycoside hydrolase%2C family 19 //	GO:0008843//	endochitinase activity//	molecular_function//
XLOC_029564	Solyc10g055810.1	SL2.50ch10:57417186-57420867	-1.02351	0	-0.644505	Endochitinase (Chitinase) (AHRD V1 **** Q43184_SOLTU)%3B contains Interpro domain(s) IPR016283 Glycoside hydrolase%2C family 19 IPR018371 Chitin-binding%2C type 1%2C conserved site IPR000726 Glycoside hydrolase%2C family 19%2C catalytic IPR001002 Chitin-binding%2C type 1 //	GO:0008843//	endochitinase activity//	molecular_function//
XLOC_006193	Solyc02g082960.2	SL2.50ch02:46564404-46566106	5.11787	0	0	Endochitinase (Chitinase) (AHRD V1 **** Q43184_SOLTU)%3B contains Interpro domain(s) IPR000726 Glycoside hydrolase%2C family 19%2C catalytic //	GO:0008843//	endochitinase activity//	molecular_function//
XLOC_005472	Solyc02g061770.2	SL2.50ch02:33290112-33291907	1.30642	-1.10837	0	Endochitinase (Chitinase) (AHRD V1 **** Q43184_SOLTU)%3B contains Interpro domain(s) IPR000726 Glycoside hydrolase%2C family 19%2C catalytic //	GO:0008843//	endochitinase activity//	molecular_function//
XLOC_004211	Solyc01g091240.2	SL2.50ch01:84911073-84913201	-0.949917	0	0	Pentatricopeptide repeat-containing protein (AHRD V1 ***- D7KHY5_ARALY)%3B contains Interpro domain(s) IPR002885 Pentatricopeptide repeat //	GO:0004519//	endonuclease activity//	molecular_function//
XLOC_002205	Solyc01g095690.2	SL2.50ch01:86879320-86882291	0	0	0.599272	Pentatricopeptide repeat-containing protein (AHRD V1 ***- D7KIA6_ARALY)%3B contains Interpro domain(s) IPR002885 Pentatricopeptide repeat //	GO:0004519//	endonuclease activity//	molecular_function//
XLOC_012024	Solyc04g009210.1	SL2.50ch04:2700799-2703648	-1.20254	0	0	Pentatricopeptide repeat-containing protein (AHRD V1 ***- D7LZR6_ARALY)%3B contains Interpro domain(s) IPR002885 Pentatricopeptide repeat //	GO:0004519//	endonuclease activity//	molecular_function//
XLOC_017915	Solyc06g066380.1	SL2.50ch06:41675975-41677301	0.705029	0	0	Pentatricopeptide repeat (AHRD V1 ***- Q2HUZ9_MEDTR)%3B contains Interpro domain(s) IPR002885 Pentatricopeptide repeat //	GO:0004519//	endonuclease activity//	molecular_function//
XLOC_012920	Solyc04g076800.2	SL2.50ch04:61677243-61679921	0	0	0.946549	Pentatricopeptide repeat-containing protein (AHRD V1 ***- D7MHD4_ARALY)%3B contains Interpro domain(s) IPR002885 Pentatricopeptide repeat //	GO:0004519//	endonuclease activity//	molecular_function//
XLOC_023892	Solyc08g013850.1	SL2.50ch08:3285896-3291606	0	0.656982	1.04988	Pentatricopeptide repeat-containing protein (AHRD V1 ***- D7MKK8_ARALY)%3B contains Interpro domain(s) IPR002885 Pentatricopeptide repeat //	GO:0004519//	endonuclease activity//	molecular_function//
XLOC_014446	Solyc04g080830.2	SL2.50ch04:64908277-64911817	-0.714817	0	0	Pentatricopeptide repeat-containing protein (AHRD V1 ***- D7KGE6_ARALY)%3B contains Interpro domain(s) IPR002885 Pentatricopeptide repeat //	GO:0004519//	endonuclease activity//	molecular_function//
XLOC_030985	Solyc11g064750.1	SL2.50ch11:49903579-49907479	-0.955925	0	0	Pentatricopeptide repeat-containing protein (AHRD V1 ***- D7LJE4_ARALY)%3B contains Interpro domain(s) IPR002885 Pentatricopeptide repeat //	GO:0004519//	endonuclease activity//	molecular_function//
XLOC_010106	Solyc03g123700.2	SL2.50ch03:70457251-70464217	-0.643489	0	0	NUMOD3 motif family protein expressed (AHRD V1 *--- Q109Y3_ORYSJ)%3B contains Interpro domain(s) IPR003611 Intron-encoded nuclease 2 //	GO:0004519//	endonuclease activity//	molecular_function//
XLOC_012851	Solyc04g074160.1	SL2.50ch04:60149425-60156026	0	0.99431	0	Pentatricopeptide repeat-containing protein (AHRD V1 ***- D7KTZ4_ARALY)%3B contains Interpro domain(s) IPR002885 Pentatricopeptide repeat //	GO:0004519//	endonuclease activity//	molecular_function//
XLOC_021946	Solyc07g052590.1	SL2.50ch07:61064431-61066456	0	0	1.19155	Pentatricopeptide repeat-containing protein (AHRD V1 ***- D7KYV9_ARALY)%3B contains Interpro domain(s) IPR002885 Pentatricopeptide repeat //	GO:0004519//	endonuclease activity//	molecular_function//
XLOC_006133	Solyc02g081900.2	SL2.50ch02:45666325-45669070	0	0	1.13711	Pentatricopeptide repeat-containing protein (AHRD V1 ***- D7KMD0_ARALY)%3B contains Interpro domain(s) IPR002885 Pentatricopeptide repeat //	GO:0004519//	endonuclease activity//	molecular_function//
XLOC_011157	Solyc03g098730.1	SL2.50ch03:61007419-61008160	0	0.535621	0	Kunitz trypsin inhibitor (AHRD V1 ***- B8Y888_TOBAC)%3B contains Interpro domain(s) IPR011065 Kunitz inhibitor ST1-like //	GO:0004866//	endopeptidase inhibitor activity//	molecular_function//
XLOC_009507	Solyc03g098720.2	SL2.50ch03:60996402-60997382	-2.33862	1.25937	0	Kunitz trypsin inhibitor (AHRD V1 ***- Q4W188_POPTN)%3B contains Interpro domain(s) IPR011065 Kunitz inhibitor ST1-like //	GO:0004866//	endopeptidase inhibitor activity//	molecular_function//
XLOC_011155	Solyc03g098700.1	SL2.50ch03:60981170-60981830	-inf	0	0	Cysteine protease inhibitor 8 (Fragment) (AHRD V1 ***- CPI8_SOLTU)%3B contains Interpro domain(s) IPR002160 Proteinase inhibitor I3%2C Kunitz legume //	GO:0004866//	endopeptidase inhibitor activity//	molecular_function//
XLOC_020581	Solyc07g044880.2	SL2.50ch07:57930108-57935611	-0.813973	0	0	Reticulon family protein (AHRD V1 ***- D7L8W9_ARALY)%3B contains Interpro domain(s) IPR003388 Reticulon //	GO:0005783//	endoplasmic reticulum//	cellular_component//
XLOC_033817	Solyc12g006290.1	SL2.50ch12:801483-806093	0	0	-0.822129	Reticulon family protein (AHRD V1 ***- D7L8W9_ARALY)%3B contains Interpro domain(s) IPR003388 Reticulon //	GO:0005783//	endoplasmic reticulum//	cellular_component//
XLOC_021172	Solyc07g005470.2	SL2.50ch07:374913-379899	0	0.865231	0	Reticulon-like protein B21 (AHRD V1 *-*- RTNLS_ARATH)%3B contains Interpro domain(s) IPR003388 Reticulon //	GO:0005783//	endoplasmic reticulum//	cellular_component//
XLOC_032720	Solyc12g010120.1	SL2.50ch12:3251390-3256639	0	0.640183	0	Reticulon-like protein B21 (AHRD V1 *-*- RTNLS_ARATH)%3B contains Interpro domain(s) IPR003388 Reticulon //	GO:0005783//	endoplasmic reticulum//	cellular_component//
XLOC_015940	Solyc05g007940.2	SL2.50ch05:2366283-2369405	1.14387	0	0.982596	Ribonuclease T2 (AHRD V1 ***- Q9ZQX1_CICAR)%3B contains Interpro domain(s) IPR001568 Ribonuclease T2 //	GO:0004521//	endoribonuclease activity//	molecular_function//
XLOC_016906	Solyc05g054490.2	SL2.50ch05:64407802-64412807	-0.560888	0	-0.589554	Trans-2-enoyl-CoA reductase (AHRD V1 **-* A9XUG8_GOSHI)%3B contains Interpro domain(s) IPR001104 3-oxo-5-alpha-steroid 4-dehydrogenase%2C C-terminal //	GO:0016631//	enoyl-[acyl-carrier-protein] reductase activity//	molecular_function//
XLOC_020252	Solyc07g019670.2	SL2.50ch07:12706952-12716182	1.65935	0	1.30891	Fatty acid oxidation complex subunit alpha (AHRD V1 ***- FADJ_ECOHS)%3B contains Interpro domain(s) IPR006176 3-hydroxyacyl-CoA dehydrogenase%2C NAD binding //	GO:0004300//	enoyl-CoA hydratase activity//	molecular_function//
XLOC_018638	Solyc06g009160.2	SL2.50ch06:3096890-3106376	0	-0.794826	0	Fatty acid oxidation complex subunit alpha (AHRD V1 ***- D2ZF34_9ENTR)%3B contains Interpro domain(s) IPR001753 Crotonase%2C core //	GO:0004300//	enoyl-CoA hydratase activity//	molecular_function//
XLOC_023223	Solyc08g068390.2	SL2.50ch08:57515510-57520906	0.77356	0	0	Fatty acid oxidation complex subunit alpha (AHRD V1 ***- FADJ_ECOHS)%3B contains Interpro domain(s) IPR006176 3-hydroxyacyl-CoA dehydrogenase%2C NAD binding //	GO:0004300//	enoyl-CoA hydratase activity//	molecular_function//
XLOC_004854	Solyc01g108020.2	SL2.50ch01:95396382-95401075	0	0	-1.17926	Thioredoxin m (AHRD V1 ***- B9HS17_POPTR)%3B contains Interpro domain(s) IPR015467 Thioredoxin%2C core //	GO:0008047//	enzyme activator activity//	molecular_function//
XLOC_028854	Solyc10g006970.2,Solyc10g006980.2	SL2.50ch10:1387298-1394761	0	0	0.93339	Thioredoxin m (AHRD V1 ***- B9HZV8_POPTR)%3B contains Interpro domain(s) IPR005746 Thioredoxin //3-deoxy-manno-octulosonate cytidylyltransferase (AHRD V1 ***- B6TZC2_MAIZE)%3B contains Interpro domain(s) IPR004528 3-deoxy-D-manno-octulosonate cytidylyltransferase //	GO:0008047//GO:0005515//	enzyme activator activity//protein binding//	molecular_function//molecular_function//
XLOC_027228	Solyc09g082830.2	SL2.50ch09:68490907-68498590	-0.863995	0	0	ARGONAUTE 1 (AHRD V1 ***- D6RUV9_TOBAC)%3B contains Interpro domain(s) IPR003165 Stem cell self-renewal protein Piwi //	GO:0019899//	enzyme binding//	molecular_function//
XLOC_005717	Solyc02g069260.2	SL2.50ch02:39204146-39211076	1.6898	0	1.48545	ARGONAUTE 1 (AHRD V1 ***- D6RUV9_TOBAC)%3B contains Interpro domain(s) IPR003165 Stem cell self-renewal protein Piwi //	GO:0019899//	enzyme binding//	molecular_function//
XLOC_018187	Solyc06g073540.2	SL2.50ch06:45332808-45341404	-1.08459	0	0	Argonaute 4-like protein (AHRD V1 ***- D5FQ91_PELHO)%3B contains Interpro domain(s) IPR003165 Stem cell self-renewal protein Piwi //	GO:0019899//	enzyme binding//	molecular_function//
XLOC_026506	Solyc09g014590.2	SL2.50ch09:6230178-6231233	0	1.67789	0	Polygalacturonase inhibitor protein (AHRD V1 **** Q40160_SOLLC)%3B contains Interpro domain(s) IPR001611 Leucine-rich repeat //	GO:0004857//	enzyme inhibitor activity//	molecular_function//
XLOC_017248	Solyc06g009170.2	SL2.50ch06:3108489-3113326	0.785147	0	0	Epoxide hydrolase 1 (AHRD V1 **** D8L7V7_PRUPE)%3B contains Interpro domain(s) IPR000639 Epoxide hydrolase-like //	GO:0004301//	epoxide hydrolase activity//	molecular_function//
XLOC_025863	Solyc09g075300.2	SL2.50ch09:67029976-67033875	-0.56774	0	-0.586461	Epoxide hydrolase 2 (AHRD V1 **** D8L7V8_PRUPE)%3B contains Interpro domain(s) IPR000639 Epoxide hydrolase-like //	GO:0004301//	epoxide hydrolase activity//	molecular_function//
XLOC_016217	Solyc05g014560.2	SL2.50ch05:8402492-8406263	-1.45896	0	0	3-oxoacyl-reductase (AHRD V1 ***- B6THT6_MAIZE)%3B contains Interpro domain(s) IPR011284 3-oxoacyl-(acyl-carrier-protein) reductase //	GO:0004303//	estradiol 17-beta-dehydrogenase activity//	molecular_function//
XLOC_015440	Solyc05g046300.2	SL2.50ch05:58515808-58524336	0.760024	0	0	Ethanolamine-phosphate cytidylyltransferase (AHRD V1 **** C5DB57_VITVI)%3B contains Interpro domain(s) IPR004820 Cytidylyltransferase //	GO:0004306//	ethanolamine-phosphate cytidylyltransferase activity//	molecular_function//
XLOC_027149	Solyc09g075440.2	SL2.50ch09:67134246-67142334	0	-0.686654	0	Ethylene receptor (AHRD V1 **** Q41341_SOLLC)%3B contains Interpro domain(s) IPR005467 Signal transduction histidine kinase%2C core //	GO:0051740//	ethylene binding//	molecular_function//
XLOC_005598	Solyc02g065470.1	SL2.50ch02:36620856-36627849	0	0	-0.63093	Pathogenesis-related protein (AHRD V1 ***- B3TLW3_ELAGV)%3B contains Interpro domain(s) IPR001283 Allergen V5/Tpx-1 related //	GO:0005576//	extracellular region//	cellular_component//
XLOC_025365	Solyc09g018020.2	SL2.50ch09:12631915-12633843	-0.976434	-0.5247	-1.16955	Expansin (AHRD V1 ***- A5H0F8_CARCN)%3B contains Interpro domain(s) IPR002963 Expansin //	GO:0005576//	extracellular region//	cellular_component//
XLOC_026417	Solyc09g010860.2	SL2.50ch09:4181505-4184618	-0.787865	0	0	Expansin (AHRD V1 ***- Q9ZP32_SOLLC)%3B contains Interpro domain(s) IPR007112 Expansin 45%2C endoglucanase-like IPR007117 Pollen allergen/expansin%2C C-terminal //	GO:0005576//	extracellular region//	cellular_component//
XLOC_019001	Solyc06g051800.2	SL2.50ch06:35478006-35479822	1.65569	0	0	Expansin (AHRD V1 ***- O04359_SOLLC)%3B contains Interpro domain(s) IPR007112 Expansin 45%2C endoglucanase-like IPR007117 Pollen allergen/expansin%2C C-terminal //	GO:0005576//	extracellular region//	cellular_component//
XLOC_014494	Solyc04g081870.2	SL2.50ch04:65734900-65737550	-0.748384	0	0	Expansin (AHRD V1 ***- Q9FVH0_SOLLC)%3B contains Interpro domain(s) IPR002963 Expansin //	GO:0005576//	extracellular region//	cellular_component//
XLOC_025013	Solyc09g006010.2	SL2.50ch09:685040-686018	-0.800612	0	0	Pathogenesis related protein PR-1 (AHRD V1 ***- Q9SC15_SOLTU)%3B contains Interpro domain(s) IPR001283 Allergen V5/Tpx-1 related //	GO:0005576//	extracellular region//	cellular_component//
XLOC_020787	Solyc07g054170.2	SL2.50ch07:62529845-62533368	-1.37236	0	0	Expansin B1 (AHRD V1 ***- C8CC40_RAPSA)%3B contains Interpro domain(s) IPR007117 Pollen allergen/expansin%2C C-terminal //	GO:0005576//	extracellular region//	cellular_component//
XLOC_032114	Solyc11g062440.1	SL2.50ch11:49501814-49507910	0.509421	0	0	Laccase (AHRD V1 ***- Q9AUI0_PINTA)%3B contains Interpro domain(s) IPR017760 L-ascorbate oxidase%2C plants //	GO:0005576//	extracellular region//	cellular_component//
XLOC_002959	Solyc01g112000.2	SL2.50ch01:98135693-98137583	1.69642	0	0	Expansin-like protein (AHRD V1 ***- A7X331_SOLLC)%3B contains Interpro domain(s) IPR007112 Expansin 45%2C endoglucanase-like IPR007117 Pollen allergen/expansin%2C C-terminal //	GO:0005576//	extracellular region//	cellular_component//
XLOC_001103	Solyc01g008830.1	SL2.50ch01:2854251-2862670	0.938619	0	0	L-ascorbate oxidase (AHRD V1 ***- B9HQ45_POPTR)%3B contains Interpro domain(s) IPR017760 L-ascorbate oxidase%2C plants //	GO:0005576//	extracellular region//	cellular_component//
XLOC_006627	Solyc02g092110.2	SL2.50ch02:53323491-53324169	1.56516	0	1.45394	Phytosulfokines 3 (AHRD V1 ***- PSK3_ARATH)%3B contains Interpro domain(s) IPR009438 Phytosulfokine //	GO:0005576//	extracellular region//	cellular_component//
XLOC_013964	Solyc04g054690.2	SL2.50ch04:53051128-53053573	2.83764	0	0	Laccase 1a (AHRD V1 ***- B9IG56_POPTR)%3B contains Interpro domain(s) IPR017760 L-ascorbate oxidase%2C plants //	GO:0005576//	extracellular region//	cellular_component//
XLOC_032220	Solyc11g066880.1	SL2.50ch11:52677619-52678834	3.15024	0	1.70937	Phytosulfokines 2 (AHRD V1 *-*- B6SU86_MAIZE)%3B contains Interpro domain(s) IPR009438 Phytosulfokine //	GO:0005576//	extracellular region//	cellular_component//
XLOC_022354	Solyc07g065880.2	SL2.50ch07:67466030-67474666	-0.722201	0	0	Kinesin (AHRD V1 *-*- Q5MNW6_GOSHI)%3B contains Interpro domain(s) IPR001752 Kinesin%2C motor region //	GO:0005576//	extracellular region//	cellular_component//
XLOC_024613	Solyc08g077330.2	SL2.50ch08:61223532-61225046	0	-1.39267	0	Expansin-like protein (AHRD V1 ***- A2ICD7_CUNLA)%3B contains Interpro domain(s) IPR007112 Expansin 45%2C endoglucanase-like //	GO:0005576//	extracellular region//	cellular_component//
XLOC_026333	Solyc09g009130.2	SL2.50ch09:2464800-2466118	1.10311	0	0.801644	Unknown Protein (AHRD V1)%3B contains Interpro domain(s) IPR009438 Phytosulfokine //	GO:0005576//	extracellular region//	cellular_component//
XLOC_019688	Solyc06g076220.2	SL2.50ch06:47360600-47362631	-0.866875	0	0	Expansin-1 (AHRD V1 ***- Q6RX69_PETHY)%3B contains Interpro domain(s) IPR002963 Expansin //	GO:0005576//	extracellular region//	cellular_component//
XLOC_000823	Solyc00g174330.2,Solyc00g174340.1	SL2.50ch00:18119490-18121692	1.8433	0	1.26194	Pathogenesis related protein PR-1 (AHRD V1 ***- Q9SC15_SOLTU)%3B contains Interpro domain(s) IPR001283 Allergen V5/Tpx-1 related //Pathogenesis-related protein 1b (AHRD V1 ***- Q941G6_SOLTU)%3B contains Interpro domain(s) IPR018244 Allergen V5/Tpx-1 related%2C conserved site //	GO:0005576//GO:0005515//	extracellular region//protein binding//	cellular_component//molecular_function//
XLOC_028234	Solyc10g054420.1	SL2.50ch10:55361401-55363395	-0.609798	0	0	Photosystem II oxygen evolving complex protein PsbP (AHRD V1 ***- A0YXJ6_LYNSP)%3B contains Interpro domain(s) IPR002683 Photosystem II oxygen evolving complex protein PsbP //	GO:0019898//	extrinsic component of membrane//	cellular_component//
XLOC_013395	Solyc04g009420.2	SL2.50ch04:2840467-2842762	0	0.863126	1.09477	Photosystem II oxygen evolving complex protein PsbP (AHRD V1 ***- Q11A16_TRIEI)%3B contains Interpro domain(s) IPR016123 Mog1/PsbP%2C alpha/beta/alpha sandwich //	GO:0019898//	extrinsic component of membrane//	cellular_component//
XLOC_027589	Solyc10g006530.2	SL2.50ch10:1096392-1098696	0	1.0522	0.911958	Oxygen evolving enhancer 3 family protein (AHRD V1 *-*- D7L9Q0_ARALY)%3B contains Interpro domain(s) IPR008797 Photosystem II oxygen evolving complex protein PsbQ //	GO:0019898//	extrinsic component of membrane//	cellular_component//
XLOC_009729	Solyc03g114930.2	SL2.50ch03:64784703-64790288	-0.918241	0	0	Photosystem II oxygen evolving complex protein PsbP (AHRD V1 ***- A0ZMM6_NODSP)%3B contains Interpro domain(s) IPR016123 Mog1/PsbP%2C alpha/beta/alpha sandwich //	GO:0019898//	extrinsic component of membrane//	cellular_component//
XLOC_023196	Solyc08g067840.2	SL2.50ch08:56873069-56881243	-0.655732	0	0	PsbP domain-containing protein 5%2C chloroplastic (AHRD V1 **-- PPD5_ARATH)%3B contains Interpro domain(s) IPR016123 Mog1/PsbP%2C alpha/beta/alpha sandwich //	GO:0019898//	extrinsic component of membrane//	cellular_component//
XLOC_014775	Solyc05g007780.2	SL2.50ch05:2237415-2239417	0	0.86251	1.3348	Oxygen evolving enhancer protein 3 (AHRD V1 ***- B6SZC8_MAIZE)%3B contains Interpro domain(s) IPR008797 Photosystem II oxygen evolving complex protein PsbQ //	GO:0019898//	extrinsic component of membrane//	cellular_component//
XLOC_014057	Solyc04g064670.2	SL2.50ch04:55819852-55823588	0	0	0.644903	Thylakoid lumenal 19 kDa protein%2C chloroplastic (AHRD V1 *-*- TL19_ARATH)%3B contains Interpro domain(s) IPR016123 Mog1/PsbP%2C alpha/beta/alpha sandwich //	GO:0019898//	extrinsic component of membrane//	cellular_component//
XLOC_002672	Solyc01g106090.2	SL2.50ch01:94080161-94083169	-0.558812	0	0	Photosystem II oxygen evolving complex protein PsbP (AHRD V1 *-*- B8HJK6_CYAP4)%3B contains Interpro domain(s) IPR002683 Photosystem II oxygen evolving complex protein PsbP //	GO:0019898//	extrinsic component of membrane//	cellular_component//
XLOC_013048	Solyc04g079080.2	SL2.50ch04:63671050-63674282	0	0	1.15064	Calmodulin (AHRD V1 *-*- Q178H5_AEDAE)%3B contains Interpro domain(s) IPR011992 EF-Hand type //	GO:0008290//	F-actin capping protein complex//	cellular_component//
XLOC_001256	Solyc01g014320.2,Solyc01g014330.2	SL2.50ch01:12034027-12042127	1.41662	0	0	S-adenosyl-L-methionine salicylic acid carboxyl methyltransferase (AHRD V1 **** A7XZE9_9MAGN)%3B contains Interpro domain(s) IPR005299 SAM dependent carboxyl methyltransferase //S-adenosyl-L-methionine carboxyl methyltransferase family protein (AHRD V1 -**- D7KVS6_ARALY)%3B contains Interpro domain(s) IPR005299 SAM dependent carboxyl methyltransferase //	GO:0019010//GO:0008168//	farnesoic acid O-methyltransferase activity//methyltransferase activity//	molecular_function//molecular_function//
XLOC_011551	Solyc03g118410.2	SL2.50ch03:67294532-67296535	-0.800349	0	0	Acyl carrier protein (AHRD V1 ***- Q672Q9_SOLLC)%3B contains Interpro domain(s) IPR003231 Acyl carrier protein (ACP) //	GO:0006633//	fatty acid biosynthetic process//	biological_process//
XLOC_001730	Solyc01g067730.2	SL2.50ch01:76674531-76676885	0	0	-0.632772	Acyl carrier protein (AHRD V1 ***- Q9XF20_CAPCH)%3B contains Interpro domain(s) IPR003231 Acyl carrier protein (ACP) //	GO:0006633//	fatty acid biosynthetic process//	biological_process//
XLOC_028959	Solyc10g009240.2	SL2.50ch10:3233895-3236001	-1.02886	0	-0.633926	Fatty acid elongase 3-ketoacyl-CoA synthase (AHRD V1 **** Q6DUV6_BRANA)%3B contains Interpro domain(s) IPR012392 Very-long-chain 3-ketoacyl-CoA synthase //	GO:0009922//	fatty acid elongase activity//	molecular_function//
XLOC_002586	Solyc01g104280.2	SL2.50ch01:92705604-92706774	0	0	0.669631	Elongation of very long chain fatty acids-like 2 protein (AHRD V1 **** D4N2R0_MELGA)%3B contains Interpro domain(s) IPR002076 GNS1/SUR4 membrane protein //	GO:0009922//	fatty acid elongase activity//	molecular_function//
XLOC_016000	Solyc05g009270.2	SL2.50ch05:3413777-3416600	-1.04126	0	0	Fatty acid elongase 3-ketoacyl-CoA synthase (AHRD V1 **** Q6DUV5_BRANA)%3B contains Interpro domain(s) IPR012392 Very-long-chain 3-ketoacyl-CoA synthase //	GO:0009922//	fatty acid elongase activity//	molecular_function//
XLOC_010140	Solyc03g005320.2	SL2.50ch03:183105-186591	-0.772293	0	0	Fatty acid elongase 3-ketoacyl-CoA synthase (AHRD V1 **** Q6DUV5_BRANA)%3B contains Interpro domain(s) IPR012392 Very-long-chain 3-ketoacyl-CoA synthase //	GO:0009922//	fatty acid elongase activity//	molecular_function//
XLOC_021452	Solyc07g018240.1	SL2.50ch07:9832154-9832976	-1.03019	0	0	Elongation of very long chain fatty acids protein 4 (AHRD V1 *-** B0W9Y0_CULQU)%3B contains Interpro domain(s) IPR002076 GNS1/SUR4 membrane protein //	GO:0009922//	fatty acid elongase activity//	molecular_function//
XLOC_027009	Solyc09g065780.2	SL2.50ch09:64058147-64059751	-1.33187	0	0	Fatty acid elongase 3-ketoacyl-CoA synthase (AHRD V1 **** Q6DUV5_BRANA)%3B contains Interpro domain(s) IPR012392 Very-long-chain 3-ketoacyl-CoA synthase //	GO:0009922//	fatty acid elongase activity//	molecular_function//
XLOC_016151	Solyc05g013220.2	SL2.50ch05:6269488-6285795	-1.83263	0	-0.77665	Fatty acid elongase 3-ketoacyl-CoA synthase (AHRD V1 **** Q6DUV6_BRANA)%3B contains Interpro domain(s) IPR012392 Very-long-chain 3-ketoacyl-CoA synthase //	GO:0009922//	fatty acid elongase activity//	molecular_function//
XLOC_020235	Solyc07g018250.1	SL2.50ch07:9896473-9897304	-1.6692	0	0	Elongation of very long chain fatty acids protein AAEL008004 (AHRD V1 **** C1BRC3_9MAXI)%3B contains Interpro domain(s) IPR002076 GNS1/SUR4 membrane protein //	GO:0009922//	fatty acid elongase activity//	molecular_function//
XLOC_024367	Solyc08g067410.1	SL2.50ch08:56452917-56455265	-0.778425	0	-0.67299	Fatty acid elongase 3-ketoacyl-CoA synthase (AHRD V1 **** Q6DUV6_BRANA)%3B contains Interpro domain(s) IPR012392 Very-long-chain 3-ketoacyl-CoA synthase //	GO:0009922//	fatty acid elongase activity//	molecular_function//
XLOC_023167	Solyc08g067260.2	SL2.50ch08:56310477-56314307	-0.647788	0	0	Fatty acid elongase 3-ketoacyl-CoA synthase (AHRD V1 **** Q6DUV6_BRANA)%3B contains Interpro domain(s) IPR012392 Very-long-chain 3-ketoacyl-CoA synthase //	GO:0009922//	fatty acid elongase activity//	molecular_function//
XLOC_005525	Solyc02g063140.2	SL2.50ch02:35212828-35215248	-1.08	0	0	Fatty acid elongase 3-ketoacyl-CoA synthase (AHRD V1 **** Q6DUV5_BRANA)%3B contains Interpro domain(s) IPR012392 Very-long-chain 3-ketoacyl-CoA synthase //	GO:0009922//	fatty acid elongase activity//	molecular_function//
XLOC_017654	Solyc06g053870.2	SL2.50ch06:36760296-36762083	-2.39393	0	-1.06016	Fatty acid elongase 3-ketoacyl-CoA synthase (AHRD V1 **** Q6DUV6_BRANA)%3B contains Interpro domain(s) IPR012392 Very-long-chain 3-ketoacyl-CoA synthase //	GO:0009922//	fatty acid elongase activity//	molecular_function//
XLOC_001716	Solyc01g067480.2	SL2.50ch01:76176451-76188832	-0.621111	0	0	Kelch-domain-containing protein (AHRD V1 *--- C5FLF8_NANOT)%3B contains Interpro domain(s) IPR015915 Kelch-type beta propeller //	GO:0000062//	fatty-acyl-CoA binding//	molecular_function//
XLOC_012985	Solyc04g078090.2	SL2.50ch04:62936238-62941771	0	0	-0.630125	Acyl-CoA-binding domain-containing protein 6 (AHRD V1 *-*- B6SHQ7_MAIZE)%3B contains Interpro domain(s) IPR000582 Acyl-CoA-binding protein%2C ACBP //	GO:0000062//	fatty-acyl-CoA binding//	molecular_function//
XLOC_018224	Solyc06g074410.2	SL2.50ch06:46037396-46040653	-0.650294	0	0	Fatty acyl coA reductase (AHRD V1 **** Q8L4M0_WHEAT)%3B contains Interpro domain(s) IPR013120 Male sterility%2C NAD-binding //	GO:0080019//	fatty-acyl-CoA reductase (alcohol-forming) activity//	molecular_function//
XLOC_023102	Solyc08g065990.2	SL2.50ch08:54438486-54444365	0.520796	0	0	Cytosolic Fe-S cluster assembly factor NAR1 (AHRD V1 ***- NAR1_YARLI)%3B contains Interpro domain(s) IPR009016 Iron hydrogenase //	GO:0008901//	ferredoxin hydrogenase activity//	molecular_function//
XLOC_004604	Solyc01g102610.2	SL2.50ch01:91372016-91376522	0	0	1.85315	Ferric reductase oxidase (AHRD V1 **-* D6RVS5_HORVU)%3B contains Interpro domain(s) IPR013130 Ferric reductase-like transmembrane component%2C N-terminal //	GO:0000293//	ferric-chelate reductase activity//	molecular_function//
XLOC_016039	Solyc05g009950.2	SL2.50ch05:4164684-4168099	-0.808207	0	0	Cytochrome B561 family protein (AHRD V1 ***- D7KQT9_ARALY)%3B contains Interpro domain(s) IPR006593 Cytochrome b561/ferric reductase transmembrane //	GO:0000293//	ferric-chelate reductase activity//	molecular_function//
XLOC_004297	Solyc01g094890.2	SL2.50ch01:86291748-86299055	0.729779	0	0	Ferric reductase oxidase (AHRD V1 **-* D6RVS5_HORVU)%3B contains Interpro domain(s) IPR013121 Ferric reductase%2C NAD binding //	GO:0000293//	ferric-chelate reductase activity//	molecular_function//
XLOC_004298	Solyc01g094910.2	SL2.50ch01:86314678-86320912	0.667244	0	0.972823	Ferric reductase oxidase (AHRD V1 **-* D6RVS5_HORVU)%3B contains Interpro domain(s) IPR013121 Ferric reductase%2C NAD binding //	GO:0000293//	ferric-chelate reductase activity//	molecular_function//
XLOC_016724	Solyc05g050540.2	SL2.50ch05:60671273-60674209	-0.700895	0	0	Laccase 1a (AHRD V1 ***- B9IG56_POPTR)%3B contains Interpro domain(s) IPR017761 Laccase //	GO:0004322//	ferroxidase activity//	molecular_function//
XLOC_023776	Solyc08g006540.2	SL2.50ch08:1149494-1154147	-0.509244	0	0	Peptidyl-prolyl cis-trans isomerase (AHRD V1 *-** B1XHQ5_SYNP2)%3B contains Interpro domain(s) IPR001179 Peptidyl-prolyl cis-trans isomerase%2C FKBP-type //	GO:0005528//	FK506 binding//	molecular_function//
XLOC_013212	Solyc04g082660.2	SL2.50ch04:66268107-66271152	-0.938959	0	0	Peptidyl-prolyl cis-trans isomerase (AHRD V1 *-*- A8YBJ2_MICAE)%3B contains Interpro domain(s) IPR001179 Peptidyl-prolyl cis-trans isomerase%2C FKBP-type //	GO:0005528//	FK506 binding//	molecular_function//
XLOC_026125	Solyc09g092690.2	SL2.50ch09:71655964-71660222	-1.67526	0	0	Peptidyl-prolyl cis-trans isomerase (AHRD V1 ***- Q86M29_BRUMA)%3B contains Interpro domain(s) IPR001179 Peptidyl-prolyl cis-trans isomerase%2C FKBP-type //	GO:0005528//	FK506 binding//	molecular_function//
XLOC_009924	Solyc03g119150.2	SL2.50ch03:67847171-67848678	0	0	0.67663	Peptidyl-prolyl cis-trans isomerase (AHRD V1 *-*- B4VX45_9CYAN)%3B contains Interpro domain(s) IPR001179 Peptidyl-prolyl cis-trans isomerase%2C FKBP-type //	GO:0005528//	FK506 binding//	molecular_function//
XLOC_013958	Solyc04g054520.2	SL2.50ch04:52640584-52648051	-0.791251	0	0	Peptidyl-prolyl cis-trans isomerase (AHRD V1 *-*- D8PA41_9BACT)%3B contains Interpro domain(s) IPR001179 Peptidyl-prolyl cis-trans isomerase%2C FKBP-type //	GO:0005528//	FK506 binding//	molecular_function//
XLOC_013512	Solyc04g015040.2	SL2.50ch04:5242207-5247624	-0.673962	0	0	Peptidyl-prolyl cis-trans isomerase (AHRD V1 ***- C1FEU4_9CHLO)%3B contains Interpro domain(s) IPR001179 Peptidyl-prolyl cis-trans isomerase%2C FKBP-type //	GO:0005528//	FK506 binding//	molecular_function//
XLOC_005444	Solyc02g036350.2	SL2.50ch02:30571988-30574305	0	-0.867408	0	1-aminocyclopropane-1-carboxylate oxidase (AHRD V1 ***- A4ZYQ6_SOLLC)%3B contains Interpro domain(s) IPR005123 Oxoglutarate and iron-dependent oxygenase //	GO:0045431//	flavonol synthase activity//	molecular_function//
XLOC_018189	Solyc06g073580.2	SL2.50ch06:45367705-45370533	0	0	-2.32491	1-aminocyclopropane-1-carboxylate oxidase 1 (AHRD V1 **-- ACCO1_ORYSJ)%3B contains Interpro domain(s) IPR005123 Oxoglutarate and iron-dependent oxygenase //	GO:0045431//	flavonol synthase activity//	molecular_function//
XLOC_023789	Solyc08g006770.2	SL2.50ch08:1336525-1338769	0	0	-1.27475	Anthocyanidin synthase (Fragment) (AHRD V1 **-* P93120_DIACA)%3B contains Interpro domain(s) IPR005123 Oxoglutarate and iron-dependent oxygenase //	GO:0045431//	flavonol synthase activity//	molecular_function//
XLOC_006096	Solyc02g081190.2	SL2.50ch02:45250837-45252543	0.760104	0	0	1-aminocyclopropane-1-carboxylate oxidase (AHRD V1 ***- Q9ZWP2_SOLLC)%3B contains Interpro domain(s) IPR005123 Oxoglutarate and iron-dependent oxygenase //	GO:0045431//	flavonol synthase activity//	molecular_function//
XLOC_004895	Solyc01g108880.2	SL2.50ch01:96025833-96027379	-1.35424	0	-0.943081	1-aminocyclopropane-1-carboxylate oxidase (AHRD V1 **-* ACCO_MUSAC)%3B contains Interpro domain(s) IPR005123 Oxoglutarate and iron-dependent oxygenase //	GO:0045431//	flavonol synthase activity//	molecular_function//
XLOC_028522	Solyc10g080970.1	SL2.50ch10:62141882-62147777	0	0	-0.85378	FolD bifunctional protein (AHRD V1 ***- B6TJF9_MAIZE)%3B contains Interpro domain(s) IPR000672 Tetrahydrofolate dehydrogenase/cyclohydrolase //	GO:0009396//	folic acid-containing compound biosynthetic process//	biological_process//
XLOC_008297	Solyc02g092530.2	SL2.50ch02:53595366-53601631	0.584441	0	0.824457	Formamidase (AHRD V1 **** B9VXW6_LUPAL)%3B contains Interpro domain(s) IPR004304 Acetamidase/Formamidase //	GO:0004328//	formamidase activity//	molecular_function//
XLOC_020797	Solyc07g054430.2	SL2.50ch07:62745862-62748667	-0.993073	0	-1.22108	Glutamate formiminotransferase (AHRD V1 **** B6UFR4_MAIZE)%3B contains Interpro domain(s) IPR012886 Formiminotransferase%2C N-terminal //	GO:0030412//	formimidoyltetrahydrofolate cyclodeaminase activity//	molecular_function//
XLOC_019551	Solyc06g073190.2	SL2.50ch06:45093318-45096091	-0.597296	0	-0.808279	Fructokinase-like (AHRD V1 **-* Q307Z3_SOLTU)%3B contains Interpro domain(s) IPR002173 Carbohydrate/puine kinase%2C PfkB%2C conserved site //	GO:0008865//	fructokinase activity//	molecular_function//
XLOC_010216	Solyc03g006860.2	SL2.50ch03:1372757-1377406	0.877984	0	0	Fructokinase (AHRD V1 **-* O04897_SOLLC)%3B contains Interpro domain(s) IPR002173 Carbohydrate/puine kinase%2C PfkB%2C conserved site //	GO:0008865//	fructokinase activity//	molecular_function//
XLOC_012756	Solyc04g071340.2	SL2.50ch04:58267264-58271868	-0.733919	0.737228	1.36097	Fructose-1 6-bisphosphatase class 1 (AHRD V1 **** D3PE46_DEFDS)%3B contains Interpro domain(s) IPR000146 Fructose-1%2C6-bisphosphatase //	GO:0042132//	fructose 1,6-bisphosphate 1-phosphatase activity//	molecular_function//
XLOC_015606	Solyc05g052600.2	SL2.50ch05:62807838-62811226	0	0	1.02163	Fructose-1 6-bisphosphatase class 1 (AHRD V1 **** B9M1N3_GEOSF)%3B contains Interpro domain(s) IPR000146 Fructose-1%2C6-bisphosphatase IPR000719 Protein kinase%2C core //	GO:0042132//	fructose 1,6-bisphosphate 1-phosphatase activity//	molecular_function//
XLOC_025260	Solyc09g011810.2	SL2.50ch09:5090037-5092652	0	0	0.870522	Fructose-1 6-bisphosphatase class 1 (AHRD V1 **** D0MHZ8_RHOM4)%3B contains Interpro domain(s) IPR000146 Fructose-1%2C6-bisphosphatase //	GO:0042132//	fructose 1,6-bisphosphate 1-phosphatase activity//	molecular_function//
XLOC_009128	Solyc03g078000.2	SL2.50ch03:48839379-48845283	0	0	0.573406	High-affinity fructose transporter ght6 (AHRD V1 **** GHT6_SCHPO)%3B contains Interpro domain(s) IPR003663 Sugar/inositol transporter //	GO:0005353//	fructose transmembrane transporter activity//	molecular_function//
XLOC_012155	Solyc04g014730.2	SL2.50ch04:4993925-5000209	0	0	-1.13196	Fumarylacetoacetase (AHRD V1 **** Q2HT34_MEDTR)%3B contains Interpro domain(s) IPR005959 Fumarylacetoacetase //	GO:0004334//	fumarylacetoacetase activity//	molecular_function//
XLOC_008216	Solyc02g090810.2	SL2.50ch02:52298521-52300624	-1.47368	0	0	Calmodulin (AHRD V1 ***- Q1WLX8_CHLIN)%3B contains Interpro domain(s) IPR011992 EF-Hand type //	GO:0031683//	G-protein beta/gamma-subunit complex binding//	molecular_function//
XLOC_007686	Solyc02g079520.1	SL2.50ch02:44055535-44055883	-0.551759	0	-0.82523	Calcium-binding EF hand family protein (Fragment) (AHRD V1 **-* D7MEH5_ARALY)%3B contains Interpro domain(s) IPR011992 EF-Hand type //	GO:0031683//	G-protein beta/gamma-subunit complex binding//	molecular_function//
XLOC_021960	Solyc07g053050.1	SL2.50ch07:61501211-61501562	0.748078	0.919392	0	Calmodulin (AHRD V1 **-- A7E7G2_SCLS1)%3B contains Interpro domain(s) IPR011992 EF-Hand type //	GO:0031683//	G-protein beta/gamma-subunit complex binding//	molecular_function//
XLOC_028963	Solyc10g009340.1	SL2.50ch10:3410163-3410535	0.614565	0	0	Calmodulin (AHRD V1 ***- Q39890_SOYBN)%3B contains Interpro domain(s) IPR011992 EF-Hand type //	GO:0031683//	G-protein beta/gamma-subunit complex binding//	molecular_function//
XLOC_016149	Solyc05g013180.2	SL2.50ch05:6257371-6262472	1.27109	0	0.964419	Xenotropic and polytropic retrovirus receptor (AHRD V1 **-* B2GU54_XENTR)%3B contains Interpro domain(s) IPR004342 EXS%2C C-terminal //	GO:0004930//	G-protein coupled receptor activity//	molecular_function//
XLOC_023342	Solyc08g076160.2	SL2.50ch08:60186501-60195166	0	0	-0.521637	Guanine nucleotide-binding protein alpha-1 subunit (AHRD V1 *-*- B6TWS6_MAIZE)%3B contains Interpro domain(s) IPR001019 Guanine nucleotide binding protein (G-protein)%2C alpha subunit //	GO:0007186//	G-protein coupled receptor signaling pathway//	biological_process//
XLOC_004906	Solyc01g109110.2	SL2.50ch01:96144136-96148951	2.25942	0	0.882668	Guanine nucleotide-binding protein alpha-1 subunit (AHRD V1 *-*- B6TWS6_MAIZE)%3B contains Interpro domain(s) IPR001019 Guanine nucleotide binding protein (G-protein)%2C alpha subunit //	GO:0007186//	G-protein coupled receptor signaling pathway//	biological_process//
XLOC_011265	Solyc03g112500.2	SL2.50ch03:62897803-62900476	-2.39932	0	0	Alpha-galactosidase (AHRD V1 *--- D6ZX00_BIFLJ)%3B contains Interpro domain(s) IPR008811 Raffinose synthase //	GO:0047274//	galactinol-sucrose galactosyltransferase activity//	molecular_function//
XLOC_008017	Solyc02g086530.2	SL2.50ch02:49197252-49201456	0	0	0.690118	Alpha-galactosidase (AHRD V1 **-- C0NUM4_AJECG)%3B contains Interpro domain(s) IPR008811 Raffinose synthase //	GO:0047274//	galactinol-sucrose galactosyltransferase activity//	molecular_function//
XLOC_000533	Solyc00g011890.2	SL2.50ch00:10333908-10350566	-0.522711	0	0	Galactokinase like protein (AHRD V1 **** O23461_ARATH)%3B contains Interpro domain(s) IPR012369 Galactokinase%2C glycosyltransferase //	GO:0004335//	galactokinase activity//	molecular_function//
XLOC_025755	Solyc09g065890.2	SL2.50ch09:64183546-64186890	1.78483	0	0	Lipase (Fragment) (AHRD V1 ***- Q9ZTW1_DIACA)%3B contains Interpro domain(s) IPR002921 Lipase%2C class 3 //	GO:0047714//	galactolipase activity//	molecular_function//
XLOC_007581	Solyc02g077420.2	SL2.50ch02:42360676-42362202	1.60343	0	0	Lipase-like (AHRD V1 ***- Q8RZ40_ORYSJ)%3B contains Interpro domain(s) IPR002921 Lipase%2C class 3 //	GO:0047714//	galactolipase activity//	molecular_function//
XLOC_028880	Solyc10g007410.2	SL2.50ch10:1772963-1779740	0.544167	0	0	Gamma-glutamyl hydrolase 2 (AHRD V1 **** D7MX15_ARALY)%3B contains Interpro domain(s) IPR015527 Peptidase C26%2C gamma-glutamyl hydrolase //	GO:0034722//	gamma-glutamyl-peptidase activity//	molecular_function//
XLOC_000740	Solyc00g099580.1	SL2.50ch00:15730750-15734014	0	1.00096	0	Gamma-glutamyltranspeptidase (AHRD V1 ***- D4Z6K6_SPHJU)%3B contains Interpro domain(s) IPR000101 Gamma-glutamyltranspeptidase //	GO:0003840//	gamma-glutamyltransferase activity//	molecular_function//
XLOC_033880	Solyc12g008640.1	SL2.50ch12:2017170-2020585	0	-0.513354	0	Gamma-glutamyltransferase-like protein (AHRD V1 ***- Q9M0G0_ARATH)%3B contains Interpro domain(s) IPR000101 Gamma-glutamyltranspeptidase //	GO:0003840//	gamma-glutamyltransferase activity//	molecular_function//
XLOC_009787	Solyc03g116270.2	SL2.50ch03:65765648-65767053	0.96169	1.17153	1.00381	Gibberellin 2-beta-dioxygenase 8 (AHRD V1 **** G2OX8_ARATH)%3B contains Interpro domain(s) IPR005123 Oxoglutarate and iron-dependent oxygenase //	GO:0045543//	gibberellin 2-beta-dioxygenase activity//	molecular_function//
XLOC_015143	Solyc05g018130.2	SL2.50ch05:20050474-20056641	0	0	0.582008	Oxidoreductase 2OG-Fe(II) oxygenase family (AHRD V1 **-- Q4KIS1_PSEF5)%3B contains Interpro domain(s) IPR005123 Oxoglutarate and iron-dependent oxygenase //	GO:0045544//	gibberellin 20-oxidase activity//	molecular_function//
XLOC_022160	Solyc07g061720.2	SL2.50ch07:64681315-64682722	1.62939	0	0	Gibberellin 2-oxidase (AHRD V1 **** A4GVL8_SOLLC)%3B contains Interpro domain(s) IPR005123 Oxoglutarate and iron-dependent oxygenase //	GO:0045544//	gibberellin 20-oxidase activity//	molecular_function//
XLOC_009966	Solyc03g119910.2	SL2.50ch03:68457817-68459199	1.18499	0	0	Gibberellin 3-beta-hydroxylase (Fragment) (AHRD V1 **** D9ZZW4_9FABA)%3B contains Interpro domain(s) IPR005123 Oxoglutarate and iron-dependent oxygenase //	GO:0016707//	gibberellin 3-beta-dioxygenase activity//	molecular_function//
XLOC_027130	Solyc09g075060.2	SL2.50ch09:66880793-66883913	1.7319	0	1.84881	Beta-glucosidase (AHRD V1 **** D7L7Z3_ARALY)%3B contains Interpro domain(s) IPR001360 Glycoside hydrolase%2C family 1 //	GO:0004338//	glucan exo-1,3-beta-glucosidase activity//	molecular_function//
XLOC_003996	Solyc01g081160.2,Solyc01g081170.1	SL2.50ch01:80468934-80474800	1.7798	0	0	Beta-glucosidase (AHRD V1 **** D3YJ59_VITVI)%3B contains Interpro domain(s) IPR001360 Glycoside hydrolase%2C family 1 //Beta-glucosidase (AHRD V1 ***- B5U9B3_9BIVA)%3B contains Interpro domain(s) IPR001360 Glycoside hydrolase%2C family 1 //	GO:0004338//GO:0005975//	glucan exo-1,3-beta-glucosidase activity//carbohydrate metabolic process//	molecular_function//biological_process//
XLOC_019330	Solyc06g066440.2	SL2.50ch06:41707150-41711767	0	0	-0.574862	Hexokinase (AHRD V1 ***- Q9FR27_SOLLC)%3B contains Interpro domain(s) IPR001312 Hexokinase //	GO:0004340//	glucokinase activity//	molecular_function//
XLOC_033470	Solyc12g088160.1,Solyc12g088170.1	SL2.50ch12:63610284-63624367	1.17259	0	0	Phosphoenolpyruvate carboxykinase (AHRD V1 ***- Q8W505_SOLLC)%3B contains Interpro domain(s) IPR001272 Phosphoenolpyruvate carboxykinase%2C ATP-utilising //Hydroxycinnamoyl CoA quinate transferase (AHRD V1 **-- D6BK25_CYNSC)%3B contains Interpro domain(s) IPR003480 Transferase //	GO:0006094//GO:0016747//	gluconeogenesis//transferase activity, transferring acyl groups other than amino-acyl groups//	biological_process//molecular_function//
XLOC_001890	Solyc01g081390.2	SL2.50ch01:80601293-80604161	-0.858977	0	0	Glucose 6 phosphate/phosphate translocator-like protein (AHRD V1 **** Q9LF61_ARATH)%3B contains Interpro domain(s) IPR004696 Tpt phosphate/phosphoenolpyruvate translocator //	GO:0008524//	glucose 6-phosphate:phosphate antiporter activity//	molecular_function//
XLOC_027094	Solyc09g074230.2	SL2.50ch09:66003685-66007669	0.667317	-0.562251	-0.762538	Glucose transporter 8 (AHRD V1 **** Q2KKJ3_SOLIN)%3B contains Interpro domain(s) IPR003663 Sugar/inositol transporter //	GO:0005536//	glucose binding//	molecular_function//
XLOC_004943	Solyc01g109790.2	SL2.50ch01:96636499-96641133	1.32529	0	1.19161	Glucose-1-phosphate adenylyltransferase (AHRD V1 **** Q15I66_SOLLC)%3B contains Interpro domain(s) IPR011831 Glucose-1-phosphate adenylyltransferase IPR005836 ADP-glucose pyrophosphorylase%2C conserved site //	GO:0008878//	glucose-1-phosphate adenylyltransferase activity//	molecular_function//
XLOC_028987	Solyc10g011760.2	SL2.50ch10:3997569-4002491	-0.967822	0	0	Aldose 1-epimerase family protein (AHRD V1 **** D7LSC1_ARALY)%3B contains Interpro domain(s) IPR008183 Aldose 1-epimerase //	GO:0047938//	glucose-6-phosphate 1-epimerase activity//	molecular_function//
XLOC_005660	Solyc02g067860.2	SL2.50ch02:37962269-37967558	0.868306	0	0	Aldose 1-epimerase family protein (AHRD V1 **** D7M6K2_ARALY)%3B contains Interpro domain(s) IPR014718 Glycoside hydrolase-type carbohydrate-binding%2C subgroup //	GO:0047938//	glucose-6-phosphate 1-epimerase activity//	molecular_function//
XLOC_006714	Solyc02g093830.2	SL2.50ch02:54535683-54541899	0	0	-0.528079	Glucose-6-phosphate 1-dehydrogenase (AHRD V1 **** Q2XTC4_SOLTU)%3B contains Interpro domain(s) IPR001282 Glucose-6-phosphate dehydrogenase //	GO:0004345//	glucose-6-phosphate dehydrogenase activity//	molecular_function//
XLOC_009157	Solyc03g078490.2	SL2.50ch03:51012790-51014867	1.46331	0	0.902385	UDP-glucuronosyltransferase (AHRD V1 **-* Q5UB81_ARATH)%3B contains Interpro domain(s) IPR002213 UDP-glucuronosyl/UDP-glucosyltransferase //	GO:0015020//	glucuronosyltransferase activity//	molecular_function//
XLOC_012861	Solyc04g074340.2	SL2.50ch04:60344647-60346435	-1.89991	0	0	UDP-glucuronosyltransferase (AHRD V1 **-* Q5UB81_ARATH)%3B contains Interpro domain(s) IPR002213 UDP-glucuronosyl/UDP-glucosyltransferase //	GO:0015020//	glucuronosyltransferase activity//	molecular_function//
XLOC_006586	Solyc02g091370.2	SL2.50ch02:52682872-52684569	-1.31883	0	0	Glucosyltransferase-2 (AHRD V1 ***- Q8S9A7_PHAAN)%3B contains Interpro domain(s) IPR002213 UDP-glucuronosyl/UDP-glucosyltransferase //	GO:0015020//	glucuronosyltransferase activity//	molecular_function//
XLOC_016976	Solyc05g055840.2	SL2.50ch05:65323164-65325971	1.11191	0	1.41124	Glucosyltransferase (AHRD V1 ***- A7M6J0_DIACA)%3B contains Interpro domain(s) IPR002213 UDP-glucuronosyl/UDP-glucosyltransferase //	GO:0015020//	glucuronosyltransferase activity//	molecular_function//
XLOC_002635	Solyc01g105350.1	SL2.50ch01:93548679-93550758	1.34244	0	2.56129	UDP-glucuronosyltransferase (AHRD V1 **-* Q5UB81_ARATH)%3B contains Interpro domain(s) IPR002213 UDP-glucuronosyl/UDP-glucosyltransferase //	GO:0015020//	glucuronosyltransferase activity//	molecular_function//
XLOC_014179	Solyc04g074350.2	SL2.50ch04:60346560-60348340	1.26486	0	1.92462	UDP-glucuronosyltransferase (AHRD V1 **-* Q5UB81_ARATH)%3B contains Interpro domain(s) IPR002213 UDP-glucuronosyl/UDP-glucosyltransferase //	GO:0015020//	glucuronosyltransferase activity//	molecular_function//
XLOC_019400	Solyc06g068770.2	SL2.50ch06:42619120-42622606	-0.566554	0	0	Exostosin-like glycosyltransferase (AHRD V1 **-- A8I7L6_CHLRE)%3B contains Interpro domain(s) IPR004263 Exostosin-like //	GO:0080116//	glucuronoxylan glucuronosyltransferase activity//	molecular_function//
XLOC_018747	Solyc06g019170.2	SL2.50ch06:17955930-17964972	0	0.609309	0	Gamma-glutamyl phosphate reductase (AHRD V1 ***- D3TQ43_GLOMM)%3B contains Interpro domain(s) IPR005766 Delta l-pyrroline-5-carboxylate synthetase //	GO:0004349//	glutamate 5-kinase activity//	molecular_function//
XLOC_012378	Solyc04g025530.2	SL2.50ch04:22348271-22352834	1.45682	0	0	Glutamate decarboxylase (AHRD V1 **** Q1I1D8_CITSI)%3B contains Interpro domain(s) IPR010107 Glutamate decarboxylase //	GO:0004351//	glutamate decarboxylase activity//	molecular_function//
XLOC_017390	Solyc06g033860.1	SL2.50ch06:23311506-23315504	1.8022	0	0	Glutamate dehydrogenase (AHRD V1 **** Q94IA5_BRANA)%3B contains Interpro domain(s) IPR014362 Glutamate dehydrogenase //	GO:0004353//	glutamate dehydrogenase [NAD(P)+] activity//	molecular_function//
XLOC_029670	Solyc10g078550.1	SL2.50ch10:60340507-60345899	0.686904	0	0	Glutamate dehydrogenase (AHRD V1 **** Q8L6A0_TOBAC)%3B contains Interpro domain(s) IPR014362 Glutamate dehydrogenase //	GO:0004353//	glutamate dehydrogenase [NAD(P)+] activity//	molecular_function//
XLOC_031589	Solyc11g011920.1	SL2.50ch11:4848640-4855394	0.977329	-0.66397	0	Glutamate decarboxylase (AHRD V1 ***- Q8LKR4_TOBAC)%3B contains Interpro domain(s) IPR010107 Glutamate decarboxylase //	GO:0006536//	glutamate metabolic process//	biological_process//
XLOC_000926	Solyc01g005000.2	SL2.50ch01:12962-15149	0.848612	0	0	Glutamate decarboxylase (AHRD V1 ***- Q1I1D8_CITSI)%3B contains Interpro domain(s) IPR010107 Glutamate decarboxylase //	GO:0006536//	glutamate metabolic process//	biological_process//
XLOC_018979	Solyc06g051410.2	SL2.50ch06:34764913-34771698	-0.650724	0	0	N-(5%26apos-phosphoribosyl)anthranilate isomerase (AHRD V1 **** B9SQM9_RICCO)%3B contains Interpro domain(s) IPR011060 Ribulose-phosphate binding barrel //	GO:0008881//	glutamate racemase activity//	molecular_function//
XLOC_008005	Solyc02g086300.2	SL2.50ch02:48995208-48997174	1.93086	0	0	Glutamine amidotransferase (AHRD V1 *-*- C6YZA6_9BACE)%3B contains Interpro domain(s) IPR011697 Peptidase C26 //	GO:0006541//	glutamine metabolic process//	biological_process//
XLOC_008642	Solyc03g007920.2,Solyc03g007930.2	SL2.50ch03:2428222-2441907	-0.540117	0	-0.696219	Glutamine cyclotransferase-like (AHRD V1 **** Q2V9A5_SOLTU)%3B contains Interpro domain(s) IPR007788 Glutamine cyclotransferase //Unknown Protein (AHRD V1)//	GO:0016603//no GOid	glutaminyl-peptide cyclotransferase activity//no GOterm//	molecular_function//no GO_branch//
XLOC_016782	Solyc05g051780.2	SL2.50ch05:62157665-62161335	-0.889262	0	0	Gamma-glutamyltransferase-like protein (AHRD V1 **** Q9M0G0_ARATH)%3B contains Interpro domain(s) IPR000101 Gamma-glutamyltranspeptidase //	GO:0016756//	glutathione gamma-glutamylcysteinyltransferase activity//	molecular_function//
XLOC_022327	Solyc07g065320.2	SL2.50ch07:67129976-67135578	1.12243	-0.553326	0	Multidrug resistance protein ABC transporter family (AHRD V1 **-- B9GJX7_POPTR)%3B contains Interpro domain(s) IPR001140 ABC transporter%2C transmembrane region //	GO:0015431//	glutathione S-conjugate-exporting ATPase activity//	molecular_function//
XLOC_025852	Solyc09g075020.2	SL2.50ch09:66819912-66829789	1.22686	0	1.25445	Multidrug resistance protein ABC transporter family (AHRD V1 **-- B9GS96_POPTR)%3B contains Interpro domain(s) IPR001140 ABC transporter%2C transmembrane region //	GO:0015431//	glutathione S-conjugate-exporting ATPase activity//	molecular_function//
XLOC_008623	Solyc03g007530.2	SL2.50ch03:2104936-2110989	0.750265	0	0	Multidrug resistance protein ABC transporter family (AHRD V1 **-- B9GX56_POPTR)%3B contains Interpro domain(s) IPR003439 ABC transporter-like //	GO:0015431//	glutathione S-conjugate-exporting ATPase activity//	molecular_function//
XLOC_024824	Solyc08g081890.2	SL2.50ch08:64806304-64813317	0	0.794285	0.961032	Multidrug resistance protein ABC transporter family (AHRD V1 **-- B9GX56_POPTR)%3B contains Interpro domain(s) IPR003439 ABC transporter-like //	GO:0015431//	glutathione S-conjugate-exporting ATPase activity//	molecular_function//
XLOC_015031	Solyc05g014380.2,Solyc05g014390.2	SL2.50ch05:8239355-8245271	0.64887	0	0	Multidrug resistance protein ABC transporter family (AHRD V1 ***- B9HTC0_POPTR)%3B contains Interpro domain(s) IPR001140 ABC transporter%2C transmembrane region //ABC transporter C family member 3 (AHRD V1 **-- AB3C_ARATH)%3B contains Interpro domain(s) IPR003439 ABC transporter-like //	GO:0015431//GO:0008559//	glutathione S-conjugate-exporting ATPase activity//xenobiotic-transporting ATPase activity//	molecular_function//molecular_function//
XLOC_022149	Solyc07g056500.2	SL2.50ch07:64305065-64306543	0.821438	0	0	Glutathione transferase (AHRD V1 **** O49821_CARPA)%3B contains Interpro domain(s) IPR004046 Glutathione S-transferase%2C C-terminal //	GO:0004364//	glutathione transferase activity//	molecular_function//
XLOC_026444	Solyc09g011490.2	SL2.50ch09:4809953-4811023	1.11035	0.862269	0.889506	Glutathione S-transferase-like protein (AHRD V1 **** A8DUB0_SOLLC)%3B contains Interpro domain(s) IPR004046 Glutathione S-transferase%2C C-terminal //	GO:0004364//	glutathione transferase activity//	molecular_function//
XLOC_014722	Solyc05g006730.2	SL2.50ch05:1377079-1379013	0	0.785396	0	Glutathione S-transferase 3 (AHRD V1 **** Q9SEK1_PAPSO)%3B contains Interpro domain(s) IPR004046 Glutathione S-transferase%2C C-terminal //	GO:0004364//	glutathione transferase activity//	molecular_function//
XLOC_020883	Solyc07g056460.2	SL2.50ch07:64293366-64295078	-1.28792	0	0	Glutathione S-transferase-like protein (AHRD V1 **** Q8GVD1_SOLLC)%3B contains Interpro domain(s) IPR004046 Glutathione S-transferase%2C C-terminal //	GO:0004364//	glutathione transferase activity//	molecular_function//
XLOC_025246	Solyc09g011560.2	SL2.50ch09:4840013-4841512	2.09061	0	1.1057	Glutathione S-transferase-like protein (AHRD V1 **** A8DUB0_SOLLC)%3B contains Interpro domain(s) IPR004046 Glutathione S-transferase%2C C-terminal //	GO:0004364//	glutathione transferase activity//	molecular_function//
XLOC_006104	Solyc02g081340.2	SL2.50ch02:45340736-45342471	1.17815	0	0	Glutathione S-transferase (AHRD V1 **** O24261_PETHY)%3B contains Interpro domain(s) IPR004046 Glutathione S-transferase%2C C-terminal //	GO:0004364//	glutathione transferase activity//	molecular_function//
XLOC_014723	Solyc05g006740.2	SL2.50ch05:1379094-1381005	0.545431	0	1.02544	Glutathione S-transferase (AHRD V1 **** A3FF38_9CARY)%3B contains Interpro domain(s) IPR004046 Glutathione S-transferase%2C C-terminal //	GO:0004364//	glutathione transferase activity//	molecular_function//
XLOC_025249	Solyc09g011590.2	SL2.50ch09:4866181-4867736	1.76271	0	0.752193	Glutathione S-transferase-like protein (AHRD V1 **** A8DUB0_SOLLC)%3B contains Interpro domain(s) IPR004046 Glutathione S-transferase%2C C-terminal //	GO:0004364//	glutathione transferase activity//	molecular_function//
XLOC_020880	Solyc07g056420.2	SL2.50ch07:64278678-64280483	0	0	0.525413	Glutathione S-transferase-like protein (AHRD V1 **** Q8GVD1_SOLLC)%3B contains Interpro domain(s) IPR004046 Glutathione S-transferase%2C C-terminal //	GO:0004364//	glutathione transferase activity//	molecular_function//
XLOC_025248	Solyc09g011580.2	SL2.50ch09:4859443-4860733	1.64369	0	0	Glutathione S-transferase-like protein (AHRD V1 **** A8DUB0_SOLLC)%3B contains Interpro domain(s) IPR004046 Glutathione S-transferase%2C C-terminal //	GO:0004364//	glutathione transferase activity//	molecular_function//
XLOC_019412	Solyc06g069040.2	SL2.50ch06:42840032-42845320	1.64026	0	0	Glutathione S-transferase (AHRD V1 **** Q84T17_PHAAT)%3B contains Interpro domain(s) IPR004046 Glutathione S-transferase%2C C-terminal //	GO:0004364//	glutathione transferase activity//	molecular_function//
XLOC_014724	Solyc05g006750.2	SL2.50ch05:1381587-1382811	2.27599	0	0	Glutathione S-transferase 1 (AHRD V1 **** C8KH57_DIOKA)%3B contains Interpro domain(s) IPR004046 Glutathione S-transferase%2C C-terminal //	GO:0004364//	glutathione transferase activity//	molecular_function//
XLOC_020884	Solyc07g056470.2,Solyc07g056480.2	SL2.50ch07:64296527-64300689	-1.31121	0	-1.24169	Glutathione S-transferase-like protein (AHRD V1 **** Q8GVD1_SOLLC)%3B contains Interpro domain(s) IPR004046 Glutathione S-transferase%2C C-terminal //Glutathione S-transferase-like protein (AHRD V1 **** Q8GVD1_SOLLC)%3B contains Interpro domain(s) IPR004046 Glutathione S-transferase%2C C-terminal //	GO:0004364//GO:0004364//	glutathione transferase activity//glutathione transferase activity//	molecular_function//molecular_function//
XLOC_005294	Solyc02g020940.2	SL2.50ch02:20374737-20376520	0	0	0.979506	Glyceraldehyde-3-phosphate dehydrogenase (AHRD V1 **** D7UNZ5_BRARC)%3B contains Interpro domain(s) IPR000173 Glyceraldehyde 3-phosphate dehydrogenase //	GO:0004365//	glyceraldehyde-3-phosphate dehydrogenase (NAD+) (phosphorylating) activity//	molecular_function//
XLOC_013573	Solyc04g016330.2	SL2.50ch04:7131358-7135570	-1.01254	0	-0.654782	Glycerol-3-phosphate dehydrogenase (AHRD V1 **** O22216_ARATH)%3B contains Interpro domain(s) IPR006168 NAD-dependent glycerol-3-phosphate dehydrogenase //	GO:0004367//	glycerol-3-phosphate dehydrogenase [NAD+] activity//	molecular_function//
XLOC_007295	Solyc02g067930.2	SL2.50ch02:38013119-38016074	-1.86994	0	-0.771554	Glycerol-3-phosphate dehydrogenase (AHRD V1 **** B4FZV9_MAIZE)%3B contains Interpro domain(s) IPR017751 NAD-dependent glycerol-3-phosphate dehydrogenase%2C eukaryotic //	GO:0004367//	glycerol-3-phosphate dehydrogenase [NAD+] activity//	molecular_function//
XLOC_009849	Solyc03g117490.2	SL2.50ch03:66637827-66640770	0	-0.585415	0	Glycerol kinase (AHRD V1 ***- Q6RUF8_SOYBN)%3B contains Interpro domain(s) IPR005999 Glycerol kinase //	GO:0006072//	glycerol-3-phosphate metabolic process//	biological_process//
XLOC_002152	Solyc01g094700.2	SL2.50ch01:86144882-86147820	-0.642623	0	0	Glycerol-3-phosphate acyltransferase 4 (AHRD V1 **** D7KQ54_ARALY)%3B contains Interpro domain(s) IPR002123 Phospholipid/glycerol acyltransferase //	GO:0004366//	glycerol-3-phosphate O-acyltransferase activity//	molecular_function//
XLOC_023355	Solyc08g076470.2	SL2.50ch08:60473435-60486698	0	0	0.691486	Glycerol-3-phosphate acyltransferase (AHRD V1 **** Q7XYH5_CAPAN)%3B contains Interpro domain(s) IPR016222 Glycerol-3-phosphate O-acyltransferase //	GO:0004366//	glycerol-3-phosphate O-acyltransferase activity//	molecular_function//
XLOC_022570	Solyc08g007040.2	SL2.50ch08:1603514-1605659	-1.13562	0	0	Glycine cleavage system H protein 1 (AHRD V1 ***- B6UHJ7_MAIZE)%3B contains Interpro domain(s) IPR017453 Glycine cleavage H-protein%2C subgroup //	GO:0019464//	glycine decarboxylation via glycine cleavage system//	biological_process//
XLOC_007741	Solyc02g080810.2	SL2.50ch02:44937880-44941414	-0.715071	0	0	Aminomethyltransferase (AHRD V1 ***- C6TF02_SOYBN)%3B contains Interpro domain(s) IPR006223 Glycine cleavage system T protein //	GO:0004375//	glycine dehydrogenase (decarboxylating) activity//	molecular_function//
XLOC_023062	Solyc08g065220.2	SL2.50ch08:53084180-53091231	0	0	1.41617	Glycine dehydrogenase P protein (AHRD V1 **** Q6V9T1_ORYSJ)%3B contains Interpro domain(s) IPR003437 Glycine cleavage system P-protein //	GO:0004375//	glycine dehydrogenase (decarboxylating) activity//	molecular_function//
XLOC_008731	Solyc03g032090.1	SL2.50ch03:4609737-4611021	1.14625	1.5974	1.65258	Amino acid transporter family protein (AHRD V1 **** D7LI10_ARALY)%3B contains Interpro domain(s) IPR013057 Amino acid transporter%2C transmembrane //	GO:0015187//	glycine transmembrane transporter activity//	molecular_function//
XLOC_024879	Solyc08g083320.2	SL2.50ch08:65815702-65819075	0	0	0.981976	Granule-bound starch synthase (AHRD V1 **** B0ZTE3_SOLTU)%3B contains Interpro domain(s) IPR011835 Glycogen/starch synthases%2C ADP-glucose type //	GO:0004373//	glycogen (starch) synthase activity//	molecular_function//
XLOC_016121	Solyc05g012510.2	SL2.50ch05:5760757-5767157	0	0	-0.667495	Phosphorylase (AHRD V1 **** B9HXL0_POPTR)%3B contains Interpro domain(s) IPR011833 Glycogen/starch/alpha-glucan phosphorylase //	GO:0008184//	glycogen phosphorylase activity//	molecular_function//
XLOC_026652	Solyc09g031970.2	SL2.50ch09:26652631-26667791	0	0	0.568225	Phosphorylase (AHRD V1 **** B9HP81_POPTR)%3B contains Interpro domain(s) IPR011833 Glycogen/starch/alpha-glucan phosphorylase //	GO:0008184//	glycogen phosphorylase activity//	molecular_function//
XLOC_011725	Solyc03g122140.2	SL2.50ch03:70082465-70085406	-1.32671	0	-0.894902	L-lactate dehydrogenase (AHRD V1 ***- B2WEY8_PYRTR)%3B contains Interpro domain(s) IPR012133 Alpha-hydroxy acid dehydrogenase%2C FMN-dependent //	GO:0008891//	glycolate oxidase activity//	molecular_function//
XLOC_033932	Solyc12g009820.1	SL2.50ch12:3016424-3020241	-0.987412	0	0	Processive diacylglycerol glucosyltransferase (AHRD V1 **-- C5NXP9_9BACL)%3B contains Interpro domain(s) IPR009695 Monogalactosyldiacylglycerol synthase //	GO:0009247//	glycolipid biosynthetic process//	biological_process//
XLOC_031008	Solyc11g065220.1	SL2.50ch11:50582925-50587891	-1.22159	0	-1.27323	Hexokinase 6 (AHRD V1 ***- Q6Q8A0_TOBAC)%3B contains Interpro domain(s) IPR001312 Hexokinase //	GO:0006096//	glycolytic process//	biological_process//
XLOC_019007	Solyc06g051930.2	SL2.50ch06:35591260-35603035	0	0	0.764128	Pyruvate kinase family protein (AHRD V1 ***- D7LSF1_ARALY)%3B contains Interpro domain(s) IPR001697 Pyruvate kinase //	GO:0006096//	glycolytic process//	biological_process//
XLOC_028604	Solyc10g083720.1	SL2.50ch10:63486645-63492559	0.839726	0	0	Pyruvate kinase (AHRD V1 ***- Q94KE3_ARATH)%3B contains Interpro domain(s) IPR001697 Pyruvate kinase //	GO:0006096//	glycolytic process//	biological_process//
XLOC_010258	Solyc03g007810.2	SL2.50ch03:2363448-2372504	-0.90239	0	-0.710199	Pyruvate kinase (AHRD V1 ***- A5BTB0_VITVI)%3B contains Interpro domain(s) IPR001697 Pyruvate kinase //	GO:0006096//	glycolytic process//	biological_process//
XLOC_020600	Solyc07g045160.2	SL2.50ch07:58257439-58261922	0.895077	0	1.7218	Phosphofructokinase family protein (AHRD V1 ***- D7MLU4_ARALY)%3B contains Interpro domain(s) IPR012004 Pyrophosphate-dependent phosphofructokinase TP0108 //	GO:0006096//	glycolytic process//	biological_process//
XLOC_014440	Solyc04g080770.2	SL2.50ch04:64860211-64866440	0	0	0.625626	GTP-binding protein hflX (AHRD V1 **** B6SXP6_MAIZE)%3B contains Interpro domain(s) IPR016496 GTP-binding protein%2C HflX //	GO:0005525//	GTP binding//	molecular_function//
XLOC_022220	Solyc07g063080.2	SL2.50ch07:65657674-65662332	-1.17933	0	0	Dynamin family protein (AHRD V1 ***- D7KKE2_ARALY)%3B contains Interpro domain(s) IPR001401 Dynamin%2C GTPase region //	GO:0005525//	GTP binding//	molecular_function//
XLOC_028022	Solyc10g047050.1	SL2.50ch10:39247169-39266589	0	0	0.666771	Dynamin-like protein (AHRD V1 ***- Q84N64_ARATH)%3B contains Interpro domain(s) IPR001401 Dynamin%2C GTPase region //	GO:0005525//	GTP binding//	molecular_function//
XLOC_019837	Solyc06g084080.2	SL2.50ch06:49327839-49332948	-1.29704	0	0	Guanylate-binding family protein (AHRD V1 ***- D7LCC4_ARALY)%3B contains Interpro domain(s) IPR015900 Guanylate-binding protein-like%2C C-terminal //	GO:0005525//	GTP binding//	molecular_function//
XLOC_018520	Solyc06g005810.2	SL2.50ch06:839933-842843	0.867245	0	0	Ras-related protein Rab-25 (AHRD V1 ***- RAB25_MOUSE)%3B contains Interpro domain(s) IPR015595 Rab11-related //	GO:0005525//	GTP binding//	molecular_function//
XLOC_031172	Solyc11g069700.1	SL2.50ch11:54307492-54310364	2.59257	-1.14936	1.78432	Elongation factor 1-alpha (AHRD V1 ***- P93769_TOBAC)%3B contains Interpro domain(s) IPR004539 Translation elongation factor EF1A%2C eukaryotic and archaeal //	GO:0005525//	GTP binding//	molecular_function//
XLOC_019789	Solyc06g083230.2	SL2.50ch06:48739832-48743174	0	0	0.870269	GTP cyclohydrolase I (AHRD V1 **** Q8VYU3_SOLLC)%3B contains Interpro domain(s) IPR001474 GTP cyclohydrolase I //	GO:0003934//	GTP cyclohydrolase I activity//	molecular_function//
XLOC_026184	Solyc09g098580.2	SL2.50ch09:72365202-72377841	0	0	0.677064	GTP pyrophosphokinase (AHRD V1 *-** Q3A9Z8_CARHZ)%3B contains Interpro domain(s) IPR007685 RelA/SpoT //	GO:0008728//	GTP diphosphokinase activity//	molecular_function//
XLOC_004129	Solyc01g088560.2	SL2.50ch01:83336019-83341655	0.563325	0	0	Ras-related protein Rab-6A (AHRD V1 ***- B6STE7_MAIZE)%3B contains Interpro domain(s) IPR015600 Rab6-related //	GO:0003924//	GTPase activity//	molecular_function//
XLOC_023778	Solyc08g006600.2	SL2.50ch08:1188223-1206699	0.513083	0	0	Dynamin-2 (AHRD V1 ***- D0MQ53_PHYIN)%3B contains Interpro domain(s) IPR000375 Dynamin central region //	GO:0003924//	GTPase activity//	molecular_function//
XLOC_011336	Solyc03g114070.2	SL2.50ch03:64110441-64118342	-1.02255	0	-0.781755	Rac-like GTP-binding protein 4 (AHRD V1 **-- B6TYX5_MAIZE)%3B contains Interpro domain(s) IPR003578 Ras small GTPase%2C Rho type //	GO:0003924//	GTPase activity//	molecular_function//
XLOC_023429	Solyc08g078070.2	SL2.50ch08:61918543-61921746	1.09631	0	0	Ras-related protein Rab-1A (AHRD V1 ***- B6RB23_HALDI)%3B contains Interpro domain(s) IPR003579 Ras small GTPase%2C Rab type //	GO:0003924//	GTPase activity//	molecular_function//
XLOC_029192	Solyc10g062160.1	SL2.50ch10:24918724-24926235	-0.592964	0	0	Dynamin like protein (AHRD V1 ***- D3BTL7_POLPA)%3B contains Interpro domain(s) IPR001401 Dynamin%2C GTPase region //	GO:0003924//	GTPase activity//	molecular_function//
XLOC_024697	Solyc08g079180.2	SL2.50ch08:62810651-62816626	0	0	1.13545	Elongation factor G (AHRD V1 ***- Q9SI75_ARATH)%3B contains Interpro domain(s) IPR004540 Translation elongation factor EFG/EF2 //	GO:0003924//	GTPase activity//	molecular_function//
XLOC_025552	Solyc09g056340.2	SL2.50ch09:48781259-48783613	0.747801	0	0	Ras-related protein Rab-25 (AHRD V1 ***- RAB25_RABIT)%3B contains Interpro domain(s) IPR015595 Rab11-related //	GO:0003924//	GTPase activity//	molecular_function//
XLOC_002227	Solyc01g096220.2	SL2.50ch01:87314715-87316882	0.491424	0.54415	0	Ras-related protein Rab-25 (AHRD V1 ***- RAB25_BOVIN)%3B contains Interpro domain(s) IPR015595 Rab11-related //	GO:0003924//	GTPase activity//	molecular_function//
XLOC_019422	Solyc06g069230.2	SL2.50ch06:42988320-42995483	-0.989951	0	0	DNA mismatch repair protein muts (AHRD V1 ***- D2V0B3_NAEGR)%3B contains Interpro domain(s) IPR011184 DNA mismatch repair protein%2C MSH2 //	GO:0032137//	guanine/thymine mispair binding//	molecular_function//
XLOC_001804	Solyc01g079520.2	SL2.50ch01:78581115-78591131	-0.781665	0	0	DNA mismatch repair protein muts (AHRD V1 ***- Q16P35_AEDAE)%3B contains Interpro domain(s) IPR017261 DNA mismatch repair protein Msh6 //	GO:0032137//	guanine/thymine mispair binding//	molecular_function//
XLOC_011066	Solyc03g096900.2	SL2.50ch03:59264641-59274056	0	0	0.613541	GTP pyrophosphokinase (AHRD V1 *--- A4AJW6_9ACTN)%3B contains Interpro domain(s) IPR007685 RelA/SpoT //	GO:0015969//	guanosine tetraphosphate metabolic process//	biological_process//
XLOC_027147	Solyc09g075390.2	SL2.50ch09:67091516-67110106	0	0	0.727933	GTP pyrophosphokinase (AHRD V1 **** Q3A9Z8_CARHZ)%3B contains Interpro domain(s) IPR007685 RelA/SpoT //	GO:0008893//	guanosine-3',5'-bis(diphosphate) 3'-diphosphatase activity//	molecular_function//
XLOC_009051	Solyc03g063600.2	SL2.50ch03:35184913-35189455	0.993136	0	0	Guanylate kinase (AHRD V1 **** Q9FVC6_TOBAC)%3B contains Interpro domain(s) IPR017665 Guanylate kinase%2C sub-group //	GO:0004385//	guanylate kinase activity//	molecular_function//
XLOC_034662	Solyc12g056850.1	SL2.50ch12:62910561-62919498	0	0	0.926982	Co-chaperone protein DnaJ (AHRD V1 *-*- A7I1Z6_CAMHC)%3B contains Interpro domain(s) IPR001623 Heat shock protein DnaJ%2C N-terminal //	GO:0031072//	heat shock protein binding//	molecular_function//
XLOC_017714	Solyc06g060090.2	SL2.50ch06:37996223-38005268	0	0	-0.626703	UBA/TS-N domain-containing protein (AHRD V1 *--- C1H097_PARBA)%3B contains Interpro domain(s) IPR001623 Heat shock protein DnaJ%2C N-terminal //	GO:0031072//	heat shock protein binding//	molecular_function//
XLOC_010100	Solyc03g123560.2	SL2.50ch03:70372557-70375424	0.601048	-0.569414	0	Chaperone protein dnaJ (AHRD V1 *-*- B4FBY1_MAIZE)%3B contains Interpro domain(s) IPR015609 Molecular chaperone%2C heat shock protein%2C Hsp40%2C DnaJ //	GO:0031072//	heat shock protein binding//	molecular_function//
XLOC_015666	Solyc05g053760.2	SL2.50ch05:63788306-63790948	0	0	1.40177	Chaperone protein dnaJ 20 (AHRD V1 ***- B6U349_MAIZE)%3B contains Interpro domain(s) IPR001623 Heat shock protein DnaJ%2C N-terminal //	GO:0031072//	heat shock protein binding//	molecular_function//
XLOC_025834	Solyc09g074610.2	SL2.50ch09:66439521-66442867	0	0	1.3591	Chaperone protein dnaJ (AHRD V1 *-*- B7GKC9_ANOFW)%3B contains Interpro domain(s) IPR015609 Molecular chaperone%2C heat shock protein%2C Hsp40%2C DnaJ //	GO:0031072//	heat shock protein binding//	molecular_function//
XLOC_027151	Solyc09g075470.2	SL2.50ch09:67171384-67173723	0	0.620785	1.46011	Chaperone protein dnaJ (AHRD V1 ***- B6U761_MAIZE)%3B contains Interpro domain(s) IPR001623 Heat shock protein DnaJ%2C N-terminal //	GO:0031072//	heat shock protein binding//	molecular_function//
XLOC_004538	Solyc01g100230.2	SL2.50ch01:90280981-90283197	0	-0.851136	0	Chaperone protein dnaJ (AHRD V1 ***- B6U761_MAIZE)%3B contains Interpro domain(s) IPR001623 Heat shock protein DnaJ%2C N-terminal //	GO:0031072//	heat shock protein binding//	molecular_function//
XLOC_014923	Solyc05g011960.2,Solyc05g011970.2	SL2.50ch05:5175084-5182458	1.31957	0	0	Heat shock protein binding protein (AHRD V1 *--- D7KWX9_ARALY)%3B contains Interpro domain(s) IPR001623 Heat shock protein DnaJ%2C N-terminal //Cytochrome P450//	GO:0031072//GO:0019825//	heat shock protein binding//oxygen binding//	molecular_function//molecular_function//
XLOC_034372	Solyc12g042920.1	SL2.50ch12:39504628-39511457	0	0	0.583411	Cytochrome c1 (AHRD V1 ***- Q9FKS5_ARATH)%3B contains Interpro domain(s) IPR002326 Cytochrome c1 //	GO:0020037//	heme binding//	molecular_function//
XLOC_022161	Solyc07g061790.2	SL2.50ch07:64740666-64741752	0	0.655647	0.881671	Heme-binding protein 2 (AHRD V1 **** B6T0C0_MAIZE)%3B contains Interpro domain(s) IPR006917 SOUL haem-binding protein //	GO:0020037//	heme binding//	molecular_function//
XLOC_028902	Solyc10g007900.2	SL2.50ch10:2091467-2095251	2.06214	0	0	Cytochrome P450//	GO:0020037//	heme binding//	molecular_function//
XLOC_020074	Solyc07g007550.2	SL2.50ch07:2221354-2226460	-1.07472	0	0	Heparanase (AHRD V1 **** A2Y9Y7_ORYSI)%3B contains Interpro domain(s) IPR005199 Glycoside hydrolase family 79%2C N-terminal //	GO:0030305//	heparanase activity//	molecular_function//
XLOC_007432	Solyc02g070280.2	SL2.50ch02:40054898-40060324	0	-1.00799	0	Amino acid transporter (AHRD V1 **** D2B5D6_STRRD)%3B contains Interpro domain(s) IPR015606 Cationic amino acid transporter //	GO:0005289//	high-affinity arginine transmembrane transporter activity//	molecular_function//
XLOC_027312	Solyc09g090730.1	SL2.50ch09:70165531-70167004	0.589851	0	0.95988	Ammonium transporter (AHRD V1 **** Q09J80_9ROSI)%3B contains Interpro domain(s) IPR001905 Ammonium transporter //	GO:0015398//	high-affinity secondary active ammonium transmembrane transporter activity//	molecular_function//
XLOC_013859	Solyc04g050440.2	SL2.50ch04:47231398-47234372	0	1.11974	2.15132	Ammonium transporter (AHRD V1 **** B9IPE2_POPTR)%3B contains Interpro domain(s) IPR001905 Ammonium transporter //	GO:0015398//	high-affinity secondary active ammonium transmembrane transporter activity//	molecular_function//
XLOC_008882	Solyc03g045070.1	SL2.50ch03:11495586-11496969	0.795905	1.35645	3.02016	Ammonium transporter (AHRD V1 **** B9HP47_POPTR)%3B contains Interpro domain(s) IPR018047 Ammonium transporter%2C conserved site IPR001905 Ammonium transporter //	GO:0015398//	high-affinity secondary active ammonium transmembrane transporter activity//	molecular_function//
XLOC_027216	Solyc09g082550.2	SL2.50ch09:68266302-68272143	2.59446	0.529882	1.2005	High affinity sulfate transporter 2 (AHRD V1 **** SUT2_STYHA)%3B contains Interpro domain(s) IPR001902 Sulphate anion transporter //	GO:0015381//	high-affinity sulfate transmembrane transporter activity//	molecular_function//
XLOC_014153	Solyc04g072740.2	SL2.50ch04:59709059-59712906	0.59444	0	0.964405	High affinity sulfate transporter 1 (AHRD V1 **** SUT1_STYHA)%3B contains Interpro domain(s) IPR001902 Sulphate anion transporter //	GO:0015381//	high-affinity sulfate transmembrane transporter activity//	molecular_function//
XLOC_014786	Solyc05g007980.2	SL2.50ch05:2404489-2409090	0.669222	0	0	High affinity sulfate transporter 2 (AHRD V1 **** SUT2_STYHA)%3B contains Interpro domain(s) IPR001902 Sulphate anion transporter //	GO:0015381//	high-affinity sulfate transmembrane transporter activity//	molecular_function//
XLOC_013966	Solyc04g054730.2	SL2.50ch04:53098445-53103462	0.875089	0	0	High affinity sulfate transporter 2 (AHRD V1 **** SUT2_STYHA)%3B contains Interpro domain(s) IPR001902 Sulphate anion transporter //	GO:0015381//	high-affinity sulfate transmembrane transporter activity//	molecular_function//
XLOC_021792	Solyc07g043230.2	SL2.50ch07:56827489-56830478	2.11174	0	1.47831	Low affinity zinc transporter (AHRD V1 **** A3LU47_PICST)%3B contains Interpro domain(s) IPR004698 Zinc/iron permease%2C fungal and plant //	GO:0000006//	high-affinity zinc uptake transmembrane transporter activity//	molecular_function//
XLOC_005399	Solyc02g032100.2	SL2.50ch02:27505844-27507762	2.7138	0	1.94097	Low affinity zinc transporter (AHRD V1 **** A3LU47_PICST)%3B contains Interpro domain(s) IPR004698 Zinc/iron permease%2C fungal and plant //	GO:0000006//	high-affinity zinc uptake transmembrane transporter activity//	molecular_function//
XLOC_026279	Solyc09g007900.2	SL2.50ch09:1419040-1422226	0.800387	0	0	Phenylalanine ammonia-lyase (AHRD V1 **** B5LAW0_CAPAN)%3B contains Interpro domain(s) IPR005922 Phenylalanine ammonia-lyase //	GO:0004397//	histidine ammonia-lyase activity//	molecular_function//
XLOC_026278	Solyc09g007890.1	SL2.50ch09:1413535-1415858	0	0	-1.24024	Phenylalanine ammonia-lyase (AHRD V1 **** B5LAW0_CAPAN)%3B contains Interpro domain(s) IPR005922 Phenylalanine ammonia-lyase //	GO:0004397//	histidine ammonia-lyase activity//	molecular_function//
XLOC_015772	Solyc05g056170.2	SL2.50ch05:65560045-65563819	-1.04027	0.678355	0	Phenylalanine ammonia-lyase (AHRD V1 **** Q50EX7_PETHY)%3B contains Interpro domain(s) IPR005922 Phenylalanine ammonia-lyase //	GO:0004397//	histidine ammonia-lyase activity//	molecular_function//
XLOC_004457	Solyc01g098400.2	SL2.50ch01:88922298-88924111	0	0	-1.04476	Histidine phosphotransfer protein (AHRD V1 **** B9I823_POPTR)%3B contains Interpro domain(s) IPR008207 Signal transduction histidine kinase%2C phosphotransfer (Hpt) region //	GO:0009927//	histidine phosphotransfer kinase activity//	molecular_function//
XLOC_024316	Solyc08g066350.1	SL2.50ch08:54918298-54921429	1.46257	0	0	Histidine phosphotransfer protein (AHRD V1 **** B9HE19_POPTR)%3B contains Interpro domain(s) IPR008207 Signal transduction histidine kinase%2C phosphotransfer (Hpt) region //	GO:0009927//	histidine phosphotransfer kinase activity//	molecular_function//
XLOC_005001	Solyc01g111590.2	SL2.50ch01:97813028-97815971	-1.39172	0	0	Histone-binding protein RBBP7 (AHRD V1 **-* B5X3G4_SALSA)%3B contains Interpro domain(s) IPR020472 G-protein beta WD-40 repeat%2C region //	GO:0042393//	histone binding//	molecular_function//
XLOC_004575	Solyc01g101030.2	SL2.50ch01:90891147-90896832	-1.25428	0	0	FACT complex subunit SPT16 (AHRD V1 ***- D3AWW1_POLPA)%3B contains Interpro domain(s) IPR013953 FACT complex subunit Spt16p/Cdc68p //	GO:0042393//	histone binding//	molecular_function//
XLOC_009958	Solyc03g119730.2	SL2.50ch03:68278465-68292067	-0.566364	0	0	Histone deacetylase 6 (AHRD V1 *-** B1AUA6_MOUSE)%3B contains Interpro domain(s) IPR000286 Histone deacetylase superfamily //	GO:0031078//	histone deacetylase activity (H3-K14 specific)//	molecular_function//
XLOC_021698	Solyc07g041000.2	SL2.50ch07:51489281-51492486	1.4781	0	0	Cleavage and polyadenylation specificity factor subunit 5 (AHRD V1 ***- C9SP81_VERA1)%3B contains Interpro domain(s) IPR016706 Cleavage and polyadenylation specificity factor%2C 25 kDa subunit //	GO:0042826//	histone deacetylase binding//	molecular_function//
XLOC_022475	Solyc08g005240.1,Solyc08g005250.2	SL2.50ch08:161497-168435	-1.39999	0	0	Lysine-specific demethylase 5B (AHRD V1 *--* KDM5B_HUMAN)%3B contains Interpro domain(s) IPR013129 Transcription factor jumonji //Jumonji domain protein (AHRD V1 ***- B9MU66_POPTR)//	GO:0034647//no GOid	histone demethylase activity (H3-trimethyl-K4 specific)//no GOterm//	molecular_function//no GO_branch//
XLOC_015634	Solyc05g053210.2	SL2.50ch05:63346245-63351255	0	0	0.806318	CBL-interacting protein kinase 1 (AHRD V1 **** A0MNI9_POPTR)%3B contains Interpro domain(s) IPR002290 Serine/threonine protein kinase //	GO:0035175//	histone kinase activity (H3-S10 specific)//	molecular_function//
XLOC_028431	Solyc10g079090.1	SL2.50ch10:60711215-60715898	0.713762	0	0	Chaperone protein dnaJ 6 (AHRD V1 ***- B6TT74_MAIZE)%3B contains Interpro domain(s) IPR003095 Heat shock protein DnaJ //	GO:0030544//	Hsp70 protein binding//	molecular_function//
XLOC_013979	Solyc04g055000.2	SL2.50ch04:53530226-53533608	1.22404	0	0	Tetratricopeptide repeat protein 4 homolog (AHRD V1 *--- TTC4_DICDI)%3B contains Interpro domain(s) IPR015609 Molecular chaperone%2C heat shock protein%2C Hsp40%2C DnaJ //	GO:0030544//	Hsp70 protein binding//	molecular_function//
XLOC_002859	Solyc01g109890.2	SL2.50ch01:96735480-96741146	0.942809	0	0	Chaperone protein dnaJ 10 (AHRD V1 **** B6T7D7_MAIZE)%3B contains Interpro domain(s) IPR003095 Heat shock protein DnaJ //	GO:0030544//	Hsp70 protein binding//	molecular_function//
XLOC_014035	Solyc04g063390.2	SL2.50ch04:55519858-55523398	-1.18671	0	0	Chaperone protein dnaJ 10 (AHRD V1 **** B4G111_MAIZE)%3B contains Interpro domain(s) IPR003095 Heat shock protein DnaJ //	GO:0030544//	Hsp70 protein binding//	molecular_function//
XLOC_020216	Solyc07g017780.2	SL2.50ch07:8095768-8102859	0.824492	0	0	H-ATPase (AHRD V1 **** Q8L6I3_ORYSJ)%3B contains Interpro domain(s) IPR006534 ATPase%2C P-type%2C plasma-membrane proton-efflux //	GO:0008553//	hydrogen-exporting ATPase activity, phosphorylative mechanism//	molecular_function//
XLOC_017957	Solyc06g068240.2	SL2.50ch06:42297877-42304406	-0.78551	0.593196	0	Pyrophosphate-energized proton pump (AHRD V1 ***- B0SRX3_LEPBP)%3B contains Interpro domain(s) IPR004131 Inorganic H+ pyrophosphatase //	GO:0009678//	hydrogen-translocating pyrophosphatase activity//	molecular_function//
XLOC_009532	Solyc03g019670.2	SL2.50ch03:61464577-61468136	0	0	-0.591111	Phosphoesterase family protein (AHRD V1 ***- D7LEV5_ARALY)%3B contains Interpro domain(s) IPR007312 Phosphoesterase //	GO:0016788//	hydrolase activity, acting on ester bonds//	molecular_function//
XLOC_017427	Solyc06g035690.2	SL2.50ch06:24713847-24720047	0.728852	0	0	Post-GPI attachment to proteins factor 3 (AHRD V1 **-- PGAP3_XENTR)%3B contains Interpro domain(s) IPR007217 Per1-like //	GO:0016788//	hydrolase activity, acting on ester bonds//	molecular_function//
XLOC_008721	Solyc03g031800.2	SL2.50ch03:4282530-4284752	1.24617	0	0	Xyloglucan endotransglucosylase/hydrolase 1 (AHRD V1 **** C0IRG0_9ERIC)%3B contains Interpro domain(s) IPR016455 Xyloglucan endotransglucosylase/hydrolase //	GO:0016798//	hydrolase activity, acting on glycosyl bonds//	molecular_function//
XLOC_020034	Solyc07g006870.2	SL2.50ch07:1722227-1724125	-1.07582	0	0	Xyloglucan endotransglucosylase/hydrolase 8 (AHRD V1 **** C0IRI1_MALDO)%3B contains Interpro domain(s) IPR016455 Xyloglucan endotransglucosylase/hydrolase //	GO:0016798//	hydrolase activity, acting on glycosyl bonds//	molecular_function//
XLOC_014673	Solyc05g005680.2	SL2.50ch05:506437-508385	0	0.859585	0	Xyloglucan endotransglucosylase/hydrolase 2 (AHRD V1 **** D5HP44_9ROSA)%3B contains Interpro domain(s) IPR016455 Xyloglucan endotransglucosylase/hydrolase //	GO:0016798//	hydrolase activity, acting on glycosyl bonds//	molecular_function//
XLOC_006514	Solyc02g089720.1	SL2.50ch02:51458621-51461019	0	0	-0.746898	Endo-beta-1 3-glucanase (AHRD V1 ***- B5THH0_PNECA)%3B contains Interpro domain(s) IPR005200 Glycoside hydrolase%2C family 81 //	GO:0016798//	hydrolase activity, acting on glycosyl bonds//	molecular_function//
XLOC_020033	Solyc07g006860.2	SL2.50ch07:1717941-1719773	2.034	0	0	Xyloglucan endotransglucosylase/hydrolase 3 (AHRD V1 **** Q06BI4_CUCME)%3B contains Interpro domain(s) IPR016455 Xyloglucan endotransglucosylase/hydrolase //	GO:0016798//	hydrolase activity, acting on glycosyl bonds//	molecular_function//
XLOC_020861	Solyc07g056000.2	SL2.50ch07:63901548-63902824	2.0956	0	-0.8956	Xyloglucan endotransglucosylase/hydrolase 7 (AHRD V1 **** C0IRG6_ACTDE)%3B contains Interpro domain(s) IPR016455 Xyloglucan endotransglucosylase/hydrolase IPR008263 Glycoside hydrolase%2C family 16%2C active site //	GO:0016798//	hydrolase activity, acting on glycosyl bonds//	molecular_function//
XLOC_010935	Solyc03g093110.2	SL2.50ch03:54284651-54285913	2.78942	1.2736	0	Xyloglucan endotransglucosylase/hydrolase 9 (AHRD V1 **** C0IRG8_9ERIC)%3B contains Interpro domain(s) IPR016455 Xyloglucan endotransglucosylase/hydrolase //	GO:0016798//	hydrolase activity, acting on glycosyl bonds//	molecular_function//
XLOC_004510	Solyc01g099630.2	SL2.50ch01:89810091-89812819	0	0	-0.555541	Xyloglucan endotransglucosylase/hydrolase 5 (AHRD V1 **** C0IRG4_ACTDE)%3B contains Interpro domain(s) IPR016455 Xyloglucan endotransglucosylase/hydrolase IPR008263 Glycoside hydrolase%2C family 16%2C active site //	GO:0016798//	hydrolase activity, acting on glycosyl bonds//	molecular_function//
XLOC_010936	Solyc03g093120.2	SL2.50ch03:54289826-54291069	2.48395	0.785701	-1.06991	Xyloglucan endotransglucosylase/hydrolase 9 (AHRD V1 **** C0IRG8_9ERIC)%3B contains Interpro domain(s) IPR016455 Xyloglucan endotransglucosylase/hydrolase //	GO:0016798//	hydrolase activity, acting on glycosyl bonds//	molecular_function//
XLOC_010933	Solyc03g093080.2	SL2.50ch03:54267478-54268694	2.55311	0.871254	-0.886859	Xyloglucan endotransglucosylase/hydrolase 9 (AHRD V1 **** C0IRG8_9ERIC)%3B contains Interpro domain(s) IPR016455 Xyloglucan endotransglucosylase/hydrolase //	GO:0016798//	hydrolase activity, acting on glycosyl bonds//	molecular_function//
XLOC_002977	Solyc01g005120.2	SL2.50ch01:104190-107414	1.30658	0	0.786921	Xyloglucan endotransglucosylase/hydrolase 13 (AHRD V1 **** C0IRH2_ACTDE)%3B contains Interpro domain(s) IPR016455 Xyloglucan endotransglucosylase/hydrolase //	GO:0016798//	hydrolase activity, acting on glycosyl bonds//	molecular_function//
XLOC_010937	Solyc03g093130.2	SL2.50ch03:54305582-54306831	3.06795	0.840239	-0.987503	Xyloglucan endotransglucosylase/hydrolase 9 (AHRD V1 **** C0IRG8_9ERIC)%3B contains Interpro domain(s) IPR016455 Xyloglucan endotransglucosylase/hydrolase IPR008263 Glycoside hydrolase%2C family 16%2C active site //	GO:0016798//	hydrolase activity, acting on glycosyl bonds//	molecular_function//
XLOC_011972	Solyc04g008210.1,Solyc04g008220.2,Solyc04g008360.2	SL2.50ch04:1894104-2011009	2.64722	0	0	Xyloglucan endotransglucosylase/hydrolase 13 (AHRD V1 **** C0IRH2_ACTDE)%3B contains Interpro domain(s) IPR016455 Xyloglucan endotransglucosylase/hydrolase //Vernalization insensitive 3 (AHRD V1 **-- A8BCW8_WHEAT)%3B contains Interpro domain(s) IPR004082 Protein of unknown function DUF1423%2C plant //CONSTANS interacting protein 6 (Fragment) (AHRD V1 *--- Q2VY13_SOLLC)%3B contains Interpro domain…	GO:0016798//no GOidno GOid	hydrolase activity, acting on glycosyl bonds//no GOterm//	molecular_function//no GO_branch//
XLOC_021114	Solyc07g065980.2	SL2.50ch07:67543252-67548178	1.6325	0	1.26311	Alkaline alpha galactosidase I (AHRD V1 **-- Q3Y5A3_CUCSA)%3B contains Interpro domain(s) IPR008811 Raffinose synthase //	GO:0004553//	hydrolase activity, hydrolyzing O-glycosyl compounds//	molecular_function//
XLOC_025174	Solyc09g010210.2	SL2.50ch09:3596731-3601979	-1.94519	0	-0.757449	Endoglucanase 1 (AHRD V1 ***- B6TRZ3_MAIZE)%3B contains Interpro domain(s) IPR008928 Six-hairpin glycosidase-like IPR012341 Six-hairpin glycosidase IPR018221 Glycoside hydrolase%2C family 9%2C active site IPR001701 Glycoside hydrolase%2C family 9 //	GO:0004553//	hydrolase activity, hydrolyzing O-glycosyl compounds//	molecular_function//
XLOC_025036	Solyc09g007380.2	SL2.50ch09:972924-982189	-1.59953	0	0	Hydrolase alpha/beta fold family protein (AHRD V1 **** D7M7Y1_ARALY)%3B contains Interpro domain(s) IPR000073 Alpha/beta hydrolase fold-1 //	GO:0016787//	hydrolase activity//	molecular_function//
XLOC_029735	Solyc10g079640.1	SL2.50ch10:61133628-61144600	0.715858	0	0	Iaa-amino acid hydrolase 9 (AHRD V1 ***- B9GU29_POPTR)%3B contains Interpro domain(s) IPR010168 Peptidase M20D%2C amidohydrolase //	GO:0016787//	hydrolase activity//	molecular_function//
XLOC_009968	Solyc03g119990.2	SL2.50ch03:68503175-68514910	-0.959677	0	0	Hydrolase alpha/beta fold family protein (AHRD V1 **** D7KX74_ARALY)%3B contains Interpro domain(s) IPR000073 Alpha/beta hydrolase fold-1 //	GO:0016787//	hydrolase activity//	molecular_function//
XLOC_028618	Solyc10g084050.1	SL2.50ch10:63719288-63729448	0.713567	0	0	26S protease regulatory subunit 6B homolog (AHRD V1 *--- PRS6B_ARATH)%3B contains Interpro domain(s) IPR005938 ATPase%2C AAA-type%2C CDC48 //	GO:0016787//	hydrolase activity//	molecular_function//
XLOC_023919	Solyc08g014470.2	SL2.50ch08:4535712-4558212	0.620105	0	0.758542	Amidohydrolase family protein (AHRD V1 ***- C1F7G0_ACIC5)%3B contains Interpro domain(s) IPR013108 Amidohydrolase 3 //	GO:0016787//	hydrolase activity//	molecular_function//
XLOC_024594	Solyc08g076990.2	SL2.50ch08:60931109-60936792	0.637121	0	0	Acetylornithine deacetylase (AHRD V1 ***- B6TIJ2_MAIZE)%3B contains Interpro domain(s) IPR011650 Peptidase M20%2C dimerisation //	GO:0016787//	hydrolase activity//	molecular_function//
XLOC_033594	Solyc12g096560.1	SL2.50ch12:65424028-65428416	0	0	-0.542935	Ectonucleoside triphosphate diphosphohydrolase 6 (AHRD V1 **-- Q6YHK4_CAVPO)%3B contains Interpro domain(s) IPR000407 Nucleoside phosphatase GDA1/CD39 //	GO:0016787//	hydrolase activity//	molecular_function//
XLOC_001858	Solyc01g080700.2	SL2.50ch01:79946577-79955704	0	0	0.590819	Inosine-uridine preferring nucleoside hydrolase family protein (AHRD V1 **** D7LYI5_ARALY)%3B contains Interpro domain(s) IPR001910 Inosine/uridine-preferring nucleoside hydrolase //	GO:0016787//	hydrolase activity//	molecular_function//
XLOC_024777	Solyc08g081030.1	SL2.50ch08:64159100-64160569	0	0	0.95912	HAD-superfamily hydrolase subfamily IA (AHRD V1 *-*- D9WQP9_STRHY)%3B contains Interpro domain(s) IPR005834 Haloacid dehalogenase-like hydrolase //	GO:0016787//	hydrolase activity//	molecular_function//
XLOC_017842	Solyc06g064870.2	SL2.50ch06:40437475-40442248	0	0	-0.734066	Hydrolase alpha/beta fold family protein (AHRD V1 **-* D7LXY6_ARALY)%3B contains Interpro domain(s) IPR000073 Alpha/beta hydrolase fold-1 //	GO:0016787//	hydrolase activity//	molecular_function//
XLOC_006661	Solyc02g092770.2	SL2.50ch02:53725870-53727869	1.51592	0	0	Hydrolase alpha/beta fold family protein expressed (AHRD V1 **-* Q10J20_ORYSJ)%3B contains Interpro domain(s) IPR000073 Alpha/beta hydrolase fold-1 //	GO:0016787//	hydrolase activity//	molecular_function//
XLOC_026354	Solyc09g009520.2	SL2.50ch09:2929990-2932883	0	0	2.13901	Hydrolase alpha/beta fold family protein (AHRD V1 **** D7LIQ3_ARALY)%3B contains Interpro domain(s) IPR000073 Alpha/beta hydrolase fold-1 //	GO:0016787//	hydrolase activity//	molecular_function//
XLOC_031386	Solyc11g006580.1	SL2.50ch11:1210193-1214590	-0.788511	0	0	RNA pyrophosphohydrolase (AHRD V1 ***- C9CZW5_9RHOB)%3B contains Interpro domain(s) IPR000086 NUDIX hydrolase domain //	GO:0016787//	hydrolase activity//	molecular_function//
XLOC_028511	Solyc10g080760.1	SL2.50ch10:61959619-61963385	-1.08964	0	0	Hydrolase NUDIX family protein expressed (AHRD V1 ***- Q6ATR4_ORYSJ)%3B contains Interpro domain(s) IPR000086 NUDIX hydrolase domain //	GO:0016787//	hydrolase activity//	molecular_function//
XLOC_014304	Solyc04g077860.2	SL2.50ch04:62742301-62744584	-0.734983	0	0	Hydrolase alpha/beta fold family protein expressed (AHRD V1 **** Q10J20_ORYSJ)%3B contains Interpro domain(s) IPR000073 Alpha/beta hydrolase fold-1 //	GO:0016787//	hydrolase activity//	molecular_function//
XLOC_022380	Solyc07g066470.2	SL2.50ch07:67889079-67892518	-1.02134	0	0	Porphobilinogen deaminase (AHRD V1 ***- B6TVP0_MAIZE)%3B contains Interpro domain(s) IPR000860 Tetrapyrrole biosynthesis%2C hydroxymethylbilane synthase //	GO:0004418//	hydroxymethylbilane synthase activity//	molecular_function//
XLOC_026139	Solyc09g097910.2	SL2.50ch09:71897891-71902022	0	0	0.600588	Polyribonucleotide nucleotidyltransferase (AHRD V1 *--- PNP_ALHEH)%3B contains Interpro domain(s) IPR003029 Ribosomal protein S1%2C RNA binding domain //	GO:0042380//	hydroxymethylbutenyl pyrophosphate reductase activity//	molecular_function//
XLOC_007062	Solyc02g038740.2	SL2.50ch02:31490988-31494050	-1.26466	0	-0.848241	3-hydroxy-3-methylglutaryl coenzyme A reductase (AHRD V1 **** Q9FS01_SOLTU)%3B contains Interpro domain(s) IPR004554 Hydroxymethylglutaryl-CoA reductase%2C class I%2C catalytic //	GO:0042282//	hydroxymethylglutaryl-CoA reductase activity//	molecular_function//
XLOC_007809	Solyc02g082260.2	SL2.50ch02:45950424-45953574	-0.996976	0	-0.846174	Hydroxy-methylglutaryl-coenzyme A reductase (AHRD V1 **** O48624_TOBAC)%3B contains Interpro domain(s) IPR004554 Hydroxymethylglutaryl-CoA reductase%2C class I%2C catalytic //	GO:0042282//	hydroxymethylglutaryl-CoA reductase activity//	molecular_function//
XLOC_010374	Solyc03g032010.2	SL2.50ch03:4506624-4509503	0.503086	0	0	Hydroxy-methylglutaryl-coenzyme A reductase (AHRD V1 **** O48624_TOBAC)%3B contains Interpro domain(s) IPR002202 Hydroxymethylglutaryl-CoA reductase%2C class I/II%2C catalytic //	GO:0042282//	hydroxymethylglutaryl-CoA reductase activity//	molecular_function//
XLOC_015854	Solyc05g006220.2	SL2.50ch05:883040-887278	1.16109	0.817699	1.0068	IAA-amino acid hydrolase (AHRD V1 **** D5FTH2_POPTO)%3B contains Interpro domain(s) IPR017439 Peptidase M20D%2C mername-AA028/carboxypeptidase Ss1 //	GO:0010179//	IAA-Ala conjugate hydrolase activity//	molecular_function//
XLOC_018160	Solyc06g073060.2	SL2.50ch06:45011708-45015995	0	0	-0.641781	Iaa-amino acid hydrolase 6 (AHRD V1 **** A9PG36_POPTR)%3B contains Interpro domain(s) IPR017439 Peptidase M20D%2C mername-AA028/carboxypeptidase Ss1 //	GO:0010179//	IAA-Ala conjugate hydrolase activity//	molecular_function//
XLOC_010029	Solyc03g121270.2	SL2.50ch03:69429832-69434237	0	0	-1.2527	IAA-amino acid hydrolase (AHRD V1 **** D5FTH2_POPTO)%3B contains Interpro domain(s) IPR017439 Peptidase M20D%2C mername-AA028/carboxypeptidase Ss1 //	GO:0010179//	IAA-Ala conjugate hydrolase activity//	molecular_function//
XLOC_008124	Solyc02g088820.2	SL2.50ch02:50774980-50780380	-0.639623	0	0	Serine carboxypeptidase K10B2.2 (AHRD V1 **** B6TSK4_MAIZE)%3B contains Interpro domain(s) IPR001563 Peptidase S10%2C serine carboxypeptidase //	GO:0042802//	identical protein binding//	molecular_function//
XLOC_007950	Solyc02g085290.2	SL2.50ch02:48231822-48236266	0	0	0.92786	Maf-like protein expressed (AHRD V1 ***- Q2R2T0_ORYSJ)%3B contains Interpro domain(s) IPR003697 Maf-like protein //	GO:0042802//	identical protein binding//	molecular_function//
XLOC_033161	Solyc12g042760.1	SL2.50ch12:39686922-39688362	-1.57526	0	0	LRR receptor-like serine/threonine-protein kinase%2C RLP//	GO:0042802//	identical protein binding//	molecular_function//
XLOC_016069	Solyc05g010590.2	SL2.50ch05:4826859-4832345	0	-0.933122	-0.799962	WPP domain-interacting tail-anchored protein 2 (AHRD V1 ***- WIT2_ARATH)//	GO:0042802//	identical protein binding//	molecular_function//
XLOC_006867	Solyc02g014830.2	SL2.50ch02:18629421-18633923	0	0	0.86607	Serine carboxypeptidase (AHRD V1 **** A6XH04_ARATH)%3B contains Interpro domain(s) IPR001563 Peptidase S10%2C serine carboxypeptidase //	GO:0042802//	identical protein binding//	molecular_function//
XLOC_009893	Solyc03g118540.2	SL2.50ch03:67430296-67433753	0	0	-0.649069	Protein TIFY 6B (AHRD V1 **-- TIF6B_ARATH)%3B contains Interpro domain(s) IPR010399 Tify //	GO:0042802//	identical protein binding//	molecular_function//
XLOC_022222	Solyc07g063120.2	SL2.50ch07:65688152-65697327	0	0	0.937887	WD-40 repeat protein (AHRD V1 *--- B7KCU4_CYAP7)%3B contains Interpro domain(s) IPR020472 G-protein beta WD-40 repeat%2C region //	GO:0042802//	identical protein binding//	molecular_function//
XLOC_019652	Solyc06g075390.2	SL2.50ch06:46792067-46799427	-0.651855	0	0	Exosome complex exonuclease RRP43 (AHRD V1 ***- B4FDY3_MAIZE)%3B contains Interpro domain(s) IPR003851 Zinc finger%2C Dof-type //	GO:0042802//	identical protein binding//	molecular_function//
XLOC_010035	Solyc03g121360.1	SL2.50ch03:69473981-69475357	0	0	-0.670369	Charged multivesicular body protein 1b (AHRD V1 ***- B6T9W6_MAIZE)%3B contains Interpro domain(s) IPR005024 Snf7 //	GO:0042802//	identical protein binding//	molecular_function//
XLOC_007178	Solyc02g063540.1	SL2.50ch02:35648515-35649566	3.42725	0	0	1-aminocyclopropane-1-carboxylate synthase (AHRD V1 **** O81143_SOLLC)%3B contains Interpro domain(s) IPR001176 1-aminocyclopropane-1-carboxylate synthase //	GO:0042802//	identical protein binding//	molecular_function//
XLOC_013523	Solyc04g015340.2	SL2.50ch04:5526388-5531684	-0.548077	-0.59982	-0.986429	Serine carboxypeptidase K10B2.2 (AHRD V1 **** B6TM29_MAIZE)%3B contains Interpro domain(s) IPR001563 Peptidase S10%2C serine carboxypeptidase //	GO:0042802//	identical protein binding//	molecular_function//
XLOC_004872	Solyc01g108490.2	SL2.50ch01:95797394-95802910	1.0663	0	0	Serine carboxypeptidase 1 (AHRD V1 **** B6SW38_MAIZE)%3B contains Interpro domain(s) IPR001563 Peptidase S10%2C serine carboxypeptidase //	GO:0042802//	identical protein binding//	molecular_function//
XLOC_006146	Solyc02g082180.2	SL2.50ch02:45884123-45889668	-1.06434	0	0	DNA replication licensing factor (AHRD V1 ***- Q2TWS7_ASPOR)%3B contains Interpro domain(s) IPR008049 MCM protein 6 //	GO:0042802//	identical protein binding//	molecular_function//
XLOC_032198	Solyc11g066250.1	SL2.50ch11:51958541-51966362	1.85974	0	2.30683	Serine carboxypeptidase (AHRD V1 **** Q9XH61_9ASTR)%3B contains Interpro domain(s) IPR001563 Peptidase S10%2C serine carboxypeptidase //	GO:0042802//	identical protein binding//	molecular_function//
XLOC_004041	Solyc01g074000.2	SL2.50ch01:81328834-81329477	-1.57532	0	0	Histone H3 (AHRD V1 ***- D8L9K7_WHEAT)%3B contains Interpro domain(s) IPR000164 Histone H3 //	GO:0042802//	identical protein binding//	molecular_function//
XLOC_017512	Solyc06g048740.1	SL2.50ch06:31661245-31664808	2.16744	0	0	Receptor like kinase%2C RLK//	GO:0042802//	identical protein binding//	molecular_function//
XLOC_001851	Solyc01g080600.2	SL2.50ch01:79838812-79842475	-1.83127	0	0	Histone H3 (AHRD V1 ***- D8L9K7_WHEAT)%3B contains Interpro domain(s) IPR000164 Histone H3 //	GO:0042802//	identical protein binding//	molecular_function//
XLOC_024828	Solyc08g081990.2	SL2.50ch08:64900861-64911761	0	0	0.905565	WD-40 repeat (AHRD V1 *--- Q3M9A6_ANAVT)%3B contains Interpro domain(s) IPR020472 G-protein beta WD-40 repeat%2C region //	GO:0042802//	identical protein binding//	molecular_function//
XLOC_001915	Solyc01g073970.2	SL2.50ch01:81315485-81316060	-2.34357	0	0	Histone H3 (AHRD V1 ***- D8L9K7_WHEAT)%3B contains Interpro domain(s) IPR000164 Histone H3 //	GO:0042802//	identical protein binding//	molecular_function//
XLOC_001783	Solyc01g079110.2	SL2.50ch01:78169950-78170571	-1.86842	0	0	Histone H3 (AHRD V1 ***- D8L9K7_WHEAT)%3B contains Interpro domain(s) IPR000164 Histone H3 //	GO:0042802//	identical protein binding//	molecular_function//
XLOC_023245	Solyc08g069030.2	SL2.50ch08:58112691-58123713	-0.692497	0	0	Delta-aminolevulinic acid dehydratase (AHRD V1 ***- B9RJ27_RICCO)%3B contains Interpro domain(s) IPR001731 Tetrapyrrole biosynthesis%2C porphobilinogen synthase //	GO:0042802//	identical protein binding//	molecular_function//
XLOC_004922	Solyc01g109420.2	SL2.50ch01:96381228-96383296	1.33292	0	0	Flavoprotein wrbA (AHRD V1 ***- B6SPB2_MAIZE)%3B contains Interpro domain(s) IPR010089 Flavoprotein WrbA //	GO:0042802//	identical protein binding//	molecular_function//
XLOC_014300	Solyc04g077780.2	SL2.50ch04:62680254-62682583	0	-0.542185	-0.991709	LIM domain protein (AHRD V1 **-- Q306K1_BRANA)%3B contains Interpro domain(s) IPR001781 Zinc finger%2C LIM-type //	GO:0042802//	identical protein binding//	molecular_function//
XLOC_014141	Solyc04g072570.2	SL2.50ch04:59543692-59550585	-0.679645	0	0	Receptor like kinase%2C RLK//	GO:0042802//	identical protein binding//	molecular_function//
XLOC_012628	Solyc04g054740.2	SL2.50ch04:53181619-53184809	0.977442	0	1.72906	Inositol-3-phosphate synthase (AHRD V1 ***- C4PW06_ARATH)%3B contains Interpro domain(s) IPR002587 Myo-inositol-1-phosphate synthase //	GO:0042802//	identical protein binding//	molecular_function//
XLOC_000953	Solyc01g005440.2	SL2.50ch01:308887-312423	0	0	-0.91205	Jasmonate ZIM-domain protein 3 (AHRD V1 **-- B2XVS2_SOLLC)%3B contains Interpro domain(s) IPR010399 Tify //	GO:0042802//	identical protein binding//	molecular_function//
XLOC_014064	Solyc04g064760.2	SL2.50ch04:55900969-55905052	-0.611232	0	0	Serine carboxypeptidase F13S12.6 (AHRD V1 **** B6U5K7_MAIZE)%3B contains Interpro domain(s) IPR001563 Peptidase S10%2C serine carboxypeptidase //	GO:0042802//	identical protein binding//	molecular_function//
XLOC_034056	Solyc12g014560.1	SL2.50ch12:5559600-5566991	-0.888171	0	0	Cell division protein ftsZ (AHRD V1 ***- B6TH29_MAIZE)%3B contains Interpro domain(s) IPR000158 Cell division protein FtsZ%2C N-terminal //	GO:0042802//	identical protein binding//	molecular_function//
XLOC_014189	Solyc04g074580.1	SL2.50ch04:60544194-60545446	-1.0298	0	-1.04044	Histone H3 (AHRD V1 ***- A8MRL0_ARATH)%3B contains Interpro domain(s) IPR000164 Histone H3 //	GO:0042802//	identical protein binding//	molecular_function//
XLOC_027700	Solyc10g008910.1	SL2.50ch10:2935606-2936017	-1.6958	0	-0.634619	Histone H3 (AHRD V1 ***- D8L9K7_WHEAT)%3B contains Interpro domain(s) IPR000164 Histone H3 //	GO:0042802//	identical protein binding//	molecular_function//
XLOC_022367	Solyc07g066230.2	SL2.50ch07:67709322-67713687	0.855995	0	0	Receptor like kinase%2C RLK//	GO:0042802//	identical protein binding//	molecular_function//
XLOC_020116	Solyc07g008530.1	SL2.50ch07:3458515-3461266	-0.635094	0	0	Tyrosyl-tRNA synthetase (AHRD V1 ***- A4RSR2_OSTLU)%3B contains Interpro domain(s) IPR002307 Tyrosyl-tRNA synthetase%2C class Ib%2C bacterial/mitochondrial //	GO:0042802//	identical protein binding//	molecular_function//
XLOC_011548	Solyc03g118370.2	SL2.50ch03:67265833-67269344	-0.971924	0	0	Serine carboxypeptidase K10B2.2 (AHRD V1 **** B6TKD2_MAIZE)%3B contains Interpro domain(s) IPR001563 Peptidase S10%2C serine carboxypeptidase //	GO:0042802//	identical protein binding//	molecular_function//
XLOC_006399	Solyc02g087400.1	SL2.50ch02:49852248-49853574	-0.690543	0	0	Ankyrin repeat domain containing protein (AHRD V1 *--- B2WQ30_PYRTR)%3B contains Interpro domain(s) IPR002110 Ankyrin //	GO:0042802//	identical protein binding//	molecular_function//
XLOC_005913	Solyc02g077480.1	SL2.50ch02:42407553-42407964	-1.52803	0	-0.566087	Histone H3 (AHRD V1 ***- D8L9K7_WHEAT)%3B contains Interpro domain(s) IPR000164 Histone H3 //	GO:0042802//	identical protein binding//	molecular_function//
XLOC_034699	Solyc12g088320.1	SL2.50ch12:63757575-63759484	-1.08018	0	0	LIM domain protein (AHRD V1 **-- Q306K1_BRANA)%3B contains Interpro domain(s) IPR001781 Zinc finger%2C LIM-type //	GO:0042802//	identical protein binding//	molecular_function//
XLOC_022307	Solyc07g065050.2	SL2.50ch07:66975058-66981446	-0.771168	0	0	Cell division protein ftsZ (AHRD V1 ***- B6TH29_MAIZE)%3B contains Interpro domain(s) IPR000158 Cell division protein FtsZ%2C N-terminal //	GO:0042802//	identical protein binding//	molecular_function//
XLOC_023354	Solyc08g076460.2	SL2.50ch08:60465921-60469858	0	0	-0.915349	Dolichyl-diphosphooligosaccharide--protein glycosyltransferase subunit DAD1-like protein (AHRD V1 **-* A2I438_MACHI)%3B contains Interpro domain(s) IPR003038 Defender against death DAD protein //	GO:0042802//	identical protein binding//	molecular_function//
XLOC_024863	Solyc08g082830.2	SL2.50ch08:65494063-65502742	0	0	0.519901	NH(3)-dependent NAD(+) synthetase (AHRD V1 ***- A1ZGC5_9BACT)%3B contains Interpro domain(s) IPR014445 Glutamine-dependent NAD(+) synthetase%2C GAT region //	GO:0042802//	identical protein binding//	molecular_function//
XLOC_019971	Solyc07g005680.2	SL2.50ch07:561659-569230	-0.660901	0	0	Serine carboxypeptidase K10B2.2 (AHRD V1 **** B6TSK4_MAIZE)%3B contains Interpro domain(s) IPR001563 Peptidase S10%2C serine carboxypeptidase //	GO:0042802//	identical protein binding//	molecular_function//
XLOC_004868	Solyc01g108450.2	SL2.50ch01:95778961-95782544	-1.74692	0	0	Serine carboxypeptidase 1 (AHRD V1 **** B6SW38_MAIZE)%3B contains Interpro domain(s) IPR001563 Peptidase S10%2C serine carboxypeptidase //	GO:0042802//	identical protein binding//	molecular_function//
XLOC_023826	Solyc08g007520.2	SL2.50ch08:2066460-2069311	-0.626387	0	0	Exosome complex exonuclease RRP42 (AHRD V1 ***- B6T4R9_MAIZE)%3B contains Interpro domain(s) IPR003377 Cornichon //	GO:0042802//	identical protein binding//	molecular_function//
XLOC_015569	Solyc05g051850.2	SL2.50ch05:62262885-62266976	2.01116	0	2.0648	Inositol-3-phosphate synthase (AHRD V1 ***- C4PW06_ARATH)%3B contains Interpro domain(s) IPR002587 Myo-inositol-1-phosphate synthase //	GO:0042802//	identical protein binding//	molecular_function//
XLOC_015549	Solyc05g051500.2	SL2.50ch05:61866700-61868891	-0.813057	0	0	Histone H3 (AHRD V1 ***- A8MRL0_ARATH)%3B contains Interpro domain(s) IPR000164 Histone H3 //	GO:0042802//	identical protein binding//	molecular_function//
XLOC_014755	Solyc05g007450.2	SL2.50ch05:2024679-2027697	-1.25906	0	0	Origin recognition complex subunit 6 (AHRD V1 ***- B6TX59_MAIZE)%3B contains Interpro domain(s) IPR008721 Origin recognition complex subunit 6 //	GO:0042802//	identical protein binding//	molecular_function//
XLOC_004049	Solyc01g086800.2	SL2.50ch01:81748612-81749211	-2.13115	0	-0.684111	Histone H3 (AHRD V1 **** Q53NE3_ORYSJ)%3B contains Interpro domain(s) IPR000164 Histone H3 //	GO:0042802//	identical protein binding//	molecular_function//
XLOC_019774	Solyc06g083030.2	SL2.50ch06:48586796-48591413	-0.842466	0	-0.713467	Serine carboxypeptidase 1 (AHRD V1 ***- B6TDA5_MAIZE)%3B contains Interpro domain(s) IPR001563 Peptidase S10%2C serine carboxypeptidase //	GO:0042802//	identical protein binding//	molecular_function//
XLOC_018065	Solyc06g071310.2	SL2.50ch06:43881382-43884630	-0.648627	0	0	LIM domain protein (AHRD V1 **-- Q306K1_BRANA)%3B contains Interpro domain(s) IPR001781 Zinc finger%2C LIM-type //	GO:0042802//	identical protein binding//	molecular_function//
XLOC_009679	Solyc03g114000.2	SL2.50ch03:64049405-64051651	0.709367	0	0	LIM domain protein (AHRD V1 **-- Q306K1_BRANA)%3B contains Interpro domain(s) IPR001781 Zinc finger%2C LIM-type //	GO:0042802//	identical protein binding//	molecular_function//
XLOC_004051	Solyc01g086820.2	SL2.50ch01:81763625-81764355	-2.05432	0	-0.560045	Histone H3 (AHRD V1 ***- D8L9K7_WHEAT)%3B contains Interpro domain(s) IPR000164 Histone H3 //	GO:0042802//	identical protein binding//	molecular_function//
XLOC_019776	Solyc06g083050.2	SL2.50ch06:48601964-48605663	0	0	-1.04842	Serine carboxypeptidase 1 (AHRD V1 ***- B6TDA5_MAIZE)%3B contains Interpro domain(s) IPR001563 Peptidase S10%2C serine carboxypeptidase //	GO:0042802//	identical protein binding//	molecular_function//
XLOC_023854	Solyc08g008100.2,Solyc08g008110.2	SL2.50ch08:2580001-2583524	2.71518	1.62109	0.951384	1-aminocyclopropane-1-carboxylate synthase (AHRD V1 **** P93235_SOLLC)%3B contains Interpro domain(s) IPR004839 Aminotransferase%2C class I and II //1-aminocyclopropane-1-carboxylate synthase (AHRD V1 ***- Q94GA2_SOLLC)%3B contains Interpro domain(s) IPR015422 Pyridoxal phosphate-dependent transferase%2C major region%2C subdomain 2 //	GO:0042802//GO:0009058//	identical protein binding//biosynthetic process//	molecular_function//biological_process//
XLOC_014128	Solyc04g072260.1,Solyc04g072270.1	SL2.50ch04:59254797-59300123	0	0	0.635887	Midasin (AHRD V1 ***- B9MXW7_POPTR)%3B contains Interpro domain(s) IPR012099 Midasin //Midasin (AHRD V1 ***- B9S5U3_RICCO)//	GO:0042802//no GOid	identical protein binding//no GOterm//	molecular_function//no GO_branch//
XLOC_022303	Solyc07g064990.2	SL2.50ch07:66931954-66934480	-2.06674	0	0	S-adenosyl-L-methionine salicylic acid carboxyl methyltransferase-like protein (AHRD V1 **** Q8LAR1_ARATH)%3B contains Interpro domain(s) IPR005299 SAM dependent carboxyl methyltransferase //	GO:0051749//	indole acetic acid carboxyl methyltransferase activity//	molecular_function//
XLOC_007193	Solyc02g064830.2	SL2.50ch02:35957103-35959463	4.52818	0	0	Indole-3-acetic acid-amido synthetase GH3.8 (AHRD V1 **** B6U4E2_MAIZE)%3B contains Interpro domain(s) IPR004993 GH3 auxin-responsive promoter //	GO:0010279//	indole-3-acetic acid amido synthetase activity//	molecular_function//
XLOC_021008	Solyc07g063850.2	SL2.50ch07:66204938-66207273	0	0.736033	0	Indole-3-acetic acid-amido synthetase GH3.8 (AHRD V1 **** B6U4E2_MAIZE)%3B contains Interpro domain(s) IPR004993 GH3 auxin-responsive promoter //	GO:0010279//	indole-3-acetic acid amido synthetase activity//	molecular_function//
XLOC_020739	Solyc07g053030.2	SL2.50ch07:61473082-61475606	2.93792	0	0	Indole-3-acetic acid-amido synthetase GH3.8 (AHRD V1 **-* B6U4E2_MAIZE)%3B contains Interpro domain(s) IPR004993 GH3 auxin-responsive promoter //	GO:0010279//	indole-3-acetic acid amido synthetase activity//	molecular_function//
XLOC_011234	Solyc03g111850.2	SL2.50ch03:62457785-62463442	-0.677266	0	0	Indole-3-glycerol phosphate synthase-like (AHRD V1 **** C8TFG9_ORYSI)%3B contains Interpro domain(s) IPR013798 Indole-3-glycerol phosphate synthase //	GO:0004425//	indole-3-glycerol-phosphate synthase activity//	molecular_function//
XLOC_001576	Solyc01g057770.2	SL2.50ch01:63675823-63679735	2.13839	0	0	AE family transporter anion exchange (AHRD V1 *--* A4RY02_OSTLU)%3B contains Interpro domain(s) IPR003020 Bicarbonate transporter%2C eukaryotic //	GO:0005452//	inorganic anion exchanger activity//	molecular_function//
XLOC_003899	Solyc01g079150.2	SL2.50ch01:78237978-78241869	1.63513	0	0.756589	AE family transporter anion exchange (AHRD V1 *--* A4RY02_OSTLU)%3B contains Interpro domain(s) IPR003020 Bicarbonate transporter%2C eukaryotic //	GO:0005452//	inorganic anion exchanger activity//	molecular_function//
XLOC_009969	Solyc03g120020.2	SL2.50ch03:68533802-68538817	0	0	4.90698	AE family transporter anion exchange (AHRD V1 *--* A4RY02_OSTLU)%3B contains Interpro domain(s) IPR003020 Bicarbonate transporter%2C eukaryotic //	GO:0005452//	inorganic anion exchanger activity//	molecular_function//
XLOC_029320	Solyc10g047950.1	SL2.50ch10:43146084-43152823	-0.720421	0	0	Inorganic pyrophosphatase family protein (AHRD V1 **** D7M262_ARALY)%3B contains Interpro domain(s) IPR008162 Inorganic pyrophosphatase //	GO:0004427//	inorganic diphosphatase activity//	molecular_function//
XLOC_007936	Solyc02g085050.2	SL2.50ch02:48072081-48075438	0.800969	0	0	Inorganic pyrophosphatase-like protein (AHRD V1 **** Q8LA73_ARATH)%3B contains Interpro domain(s) IPR008162 Inorganic pyrophosphatase //	GO:0004427//	inorganic diphosphatase activity//	molecular_function//
XLOC_025998	Solyc09g090080.1	SL2.50ch09:69633749-69635354	1.98605	0	0	Inorganic phosphate transporter (AHRD V1 **** Q9LLS5_TOBAC)%3B contains Interpro domain(s) IPR004738 Phosphate permease //	GO:0005315//	inorganic phosphate transmembrane transporter activity//	molecular_function//
XLOC_026667	Solyc09g031750.2	SL2.50ch09:28023573-28029028	0	0	0.910773	Vesicular glutamate transporter (AHRD V1 **-* B3A011_9PULM)%3B contains Interpro domain(s) IPR016196 Major facilitator superfamily%2C general substrate transporter //	GO:0005315//	inorganic phosphate transmembrane transporter activity//	molecular_function//
XLOC_021264	Solyc07g007560.2	SL2.50ch07:2226486-2235811	0.780824	0.595416	1.30863	Vesicular glutamate transporter 3 (AHRD V1 **-* B5AU16_DANRE)%3B contains Interpro domain(s) IPR016196 Major facilitator superfamily%2C general substrate transporter //	GO:0005315//	inorganic phosphate transmembrane transporter activity//	molecular_function//
XLOC_025997	Solyc09g090070.1	SL2.50ch09:69623264-69627148	0	-0.842556	0	Inorganic phosphate transporter (AHRD V1 **** O22548_SOLLC)%3B contains Interpro domain(s) IPR004738 Phosphate permease //	GO:0005315//	inorganic phosphate transmembrane transporter activity//	molecular_function//
XLOC_002154	Solyc01g094720.2	SL2.50ch01:86152531-86158757	0	0	0.643597	Vesicular glutamate transporter (AHRD V1 **-* B3A011_9PULM)%3B contains Interpro domain(s) IPR016196 Major facilitator superfamily%2C general substrate transporter //	GO:0005315//	inorganic phosphate transmembrane transporter activity//	molecular_function//
XLOC_011114	Solyc03g097840.2	SL2.50ch03:60159947-60170516	1.66912	0	0	Mitochondrial phosphate carrier protein (AHRD V1 **** B9GFH9_POPTR)%3B contains Interpro domain(s) IPR001993 Mitochondrial substrate carrier //	GO:0005315//	inorganic phosphate transmembrane transporter activity//	molecular_function//
XLOC_002863	Solyc01g109930.2	SL2.50ch01:96761722-96766540	-0.801615	0	0	Inositol monophosphatase family protein (AHRD V1 **** D7MGB6_ARALY)%3B contains Interpro domain(s) IPR011809 Histidinol-phosphate phosphatase%2C putative%2C inositol monophosphatase //	GO:0008934//	inositol monophosphate 1-phosphatase activity//	molecular_function//
XLOC_012160	Solyc04g014800.2	SL2.50ch04:5038852-5042771	0	0	0.990973	L-galactose-1-phosphate phosphatase 2//	GO:0008934//	inositol monophosphate 1-phosphatase activity//	molecular_function//
XLOC_019182	Solyc06g062430.2	SL2.50ch06:39376539-39380151	1.26983	1.10911	0	Inositol oxygenase (AHRD V1 **** A5FF81_FLAJ1)%3B contains Interpro domain(s) IPR007828 Protein of unknown function DUF706 //	GO:0050113//	inositol oxygenase activity//	molecular_function//
XLOC_025258	Solyc09g011740.2	SL2.50ch09:5033861-5037954	0.950626	0	0	Phosphatidylcholine:ceramide cholinephosphotransferase 1 (AHRD V1 *-*- SMS1_RAT)//	GO:0045140//	inositol phosphoceramide synthase activity//	molecular_function//
XLOC_028748	Solyc10g086690.1	SL2.50ch10:65458370-65461557	2.73044	0	0	Phosphatidylcholine:ceramide cholinephosphotransferase 2 (AHRD V1 *-*- SMS2_MACFA)//	GO:0045140//	inositol phosphoceramide synthase activity//	molecular_function//
XLOC_033475	Solyc12g088200.1	SL2.50ch12:63645496-63651572	0.725422	-0.92781	0	Inositol-tetrakisphosphate 1-kinase 3 (AHRD V1 ***- B4FHJ7_MAIZE)%3B contains Interpro domain(s) IPR017427 Inositol-tetrakisphosphate 1-kinase //	GO:0047325//	inositol tetrakisphosphate 1-kinase activity//	molecular_function//
XLOC_027205	Solyc09g082370.2	SL2.50ch09:68111486-68116825	-0.704745	0	0	Inositol 1 4 5-trisphosphate 5-phosphatase (AHRD V1 **** Q712G2_ARATH)%3B contains Interpro domain(s) IPR000300 Inositol polyphosphate related phosphatase //	GO:0046030//	inositol trisphosphate phosphatase activity//	molecular_function//
XLOC_023805	Solyc08g007080.2	SL2.50ch08:1636635-1641994	1.31999	-1.19094	0	Inositol 1 4 5-trisphosphate 5-phosphatase (AHRD V1 **** Q712G2_ARATH)%3B contains Interpro domain(s) IPR000300 Inositol polyphosphate related phosphatase //	GO:0004445//	inositol-polyphosphate 5-phosphatase activity//	molecular_function//
XLOC_024605	Solyc08g077210.2	SL2.50ch08:61108578-61113571	2.1016	0	0	Inositol 1 4 5-trisphosphate 5-phosphatase (AHRD V1 *-** Q712G2_ARATH)%3B contains Interpro domain(s) IPR000300 Inositol polyphosphate related phosphatase //	GO:0004445//	inositol-polyphosphate 5-phosphatase activity//	molecular_function//
XLOC_008058	Solyc02g087430.2	SL2.50ch02:49875705-49882007	1.01024	0	1.23547	Inositol 1 4 5-trisphosphate 5-phosphatase-like protein (AHRD V1 **** Q6H453_ORYSJ)%3B contains Interpro domain(s) IPR000300 Inositol polyphosphate related phosphatase //	GO:0004445//	inositol-polyphosphate 5-phosphatase activity//	molecular_function//
XLOC_011102	Solyc03g097600.2	SL2.50ch03:59936731-59938490	1.75246	0	1.18931	MtN3-like protein (AHRD V1 **-- Q9LUE3_ARATH)%3B contains Interpro domain(s) IPR018179 RAG1-activating protein 1 homologue //	GO:0016021//	integral component of membrane//	cellular_component//
XLOC_009466	Solyc03g097870.2	SL2.50ch03:60189844-60192425	1.81637	0	1.30992	MtN3-like protein (AHRD V1 **-- Q9LUE3_ARATH)%3B contains Interpro domain(s) IPR018179 RAG1-activating protein 1 homologue //	GO:0016021//	integral component of membrane//	cellular_component//
XLOC_016304	Solyc05g016120.1	SL2.50ch05:14606093-14607288	-1.77613	0	0	Photosystem Q(B) protein (AHRD V1 ***- Q33128_SOLNI)%3B contains Interpro domain(s) IPR000484 Photosynthetic reaction centre%2C L/M //	GO:0016021//	integral component of membrane//	cellular_component//
XLOC_028315	Solyc10g074790.1	SL2.50ch10:58506245-58511648	0.929734	0	0	Auxin efflux carrier family protein (AHRD V1 ***- D7M6D2_ARALY)%3B contains Interpro domain(s) IPR004776 Auxin efflux carrier //	GO:0016021//	integral component of membrane//	cellular_component//
XLOC_001744	Solyc01g067930.2	SL2.50ch01:76941647-76943451	1.03702	0	0	Alpha-1 6-xylosyltransferase (Fragment) (AHRD V1 **-- Q5TIN3_GOSRA)%3B contains Interpro domain(s) IPR008630 Galactosyl transferase //	GO:0016021//	integral component of membrane//	cellular_component//
XLOC_033928	Solyc12g009680.1	SL2.50ch12:2935850-2939000	-0.65846	0	0	Adiponectin receptor protein 2 (AHRD V1 ***- B0W6M8_CULQU)%3B contains Interpro domain(s) IPR004254 Hly-III related //	GO:0016021//	integral component of membrane//	cellular_component//
XLOC_012231	Solyc04g016170.1	SL2.50ch04:6910494-6911001	-1.98788	0	0	Photosystem I P700 chlorophyll a apoprotein A2 (AHRD V1 ***- D3WE65_9MAGN)%3B contains Interpro domain(s) IPR001280 Photosystem I psaA and psaB //	GO:0016021//	integral component of membrane//	cellular_component//
XLOC_014055	Solyc04g064640.2	SL2.50ch04:55809808-55812814	0	0	2.05185	RAG1-activating protein 1 homolog (AHRD V1 **-- R1AP1_DICDI)%3B contains Interpro domain(s) IPR018179 RAG1-activating protein 1 homologue //	GO:0016021//	integral component of membrane//	cellular_component//
XLOC_019996	Solyc07g006280.2	SL2.50ch07:1069323-1072745	1.58078	0	0	Senescence-associated protein (AHRD V1 ***- B3TLS7_ELAGV)%3B contains Interpro domain(s) IPR000301 Tetraspanin%2C subgroup //	GO:0016021//	integral component of membrane//	cellular_component//
XLOC_032823	Solyc12g014110.1	SL2.50ch12:4926720-4930617	0	0	-0.567376	Sodium/calcium exchanger family protein (AHRD V1 ***- D7KKF3_ARALY)%3B contains Interpro domain(s) IPR004837 Sodium/calcium exchanger membrane region //	GO:0016021//	integral component of membrane//	cellular_component//
XLOC_007572	Solyc02g077270.2	SL2.50ch02:42258136-42262473	1.23999	0	0	Calcium ion binding protein (AHRD V1 *-*- B6U1M5_MAIZE)%3B contains Interpro domain(s) IPR011992 EF-Hand type //	GO:0016021//	integral component of membrane//	cellular_component//
XLOC_004815	Solyc01g107240.2	SL2.50ch01:94857959-94861548	0	1.06877	1.13794	Peroxisomal membrane MPV17/PMP22-like protein (AHRD V1 *--- A8J1X1_CHLRE)%3B contains Interpro domain(s) IPR007248 Mpv17/PMP22 //	GO:0016021//	integral component of membrane//	cellular_component//
XLOC_015223	Solyc05g024260.2	SL2.50ch05:30963569-30966033	0	0	1.11209	RAG1-activating protein 1 homolog (AHRD V1 **-- R1AP1_DANRE)%3B contains Interpro domain(s) IPR018179 RAG1-activating protein 1 homologue //	GO:0016021//	integral component of membrane//	cellular_component//
XLOC_025272	Solyc09g013070.2	SL2.50ch09:5483366-5484336	0	0	-0.74321	3-oxo-5-alpha-steroid 4-dehydrogenase family protein expressed (AHRD V1 ***- Q53NE6_ORYSJ)%3B contains Interpro domain(s) IPR001104 3-oxo-5-alpha-steroid 4-dehydrogenase%2C C-terminal //	GO:0016021//	integral component of membrane//	cellular_component//
XLOC_028927	Solyc10g008500.2	SL2.50ch10:2616610-2624112	0.784264	0	0	Mpv17 (AHRD V1 *--- C1BTV5_9MAXI)%3B contains Interpro domain(s) IPR007248 Mpv17/PMP22 //	GO:0016021//	integral component of membrane//	cellular_component//
XLOC_012917	Solyc04g076740.2	SL2.50ch04:61634227-61638198	-0.570497	0	0	Tic20-like protein (AHRD V1 ***- Q2V9A0_SOLTU)%3B contains Interpro domain(s) IPR005691 Chloroplast protein import component Tic20 //	GO:0016021//	integral component of membrane//	cellular_component//
XLOC_019410	Solyc06g068970.2	SL2.50ch06:42786904-42789731	0	0	0.866659	Conserved transmembrane protein (AHRD V1 **-- A0PNM5_MYCUA)%3B contains Interpro domain(s) IPR010721 Protein of unknown function DUF1295 //	GO:0016021//	integral component of membrane//	cellular_component//
XLOC_011103	Solyc03g097610.2	SL2.50ch03:59945737-59947874	2.57636	0	2.5949	MtN3-like protein (AHRD V1 **-- Q9LUE3_ARATH)%3B contains Interpro domain(s) IPR018179 RAG1-activating protein 1 homologue //	GO:0016021//	integral component of membrane//	cellular_component//
XLOC_028400	Solyc10g078370.1	SL2.50ch10:60193834-60197308	0	0.754736	0	Auxin efflux carrier (AHRD V1 ***- D6RT09_SOLLC)%3B contains Interpro domain(s) IPR014024 Auxin efflux carrier%2C subgroup //	GO:0016021//	integral component of membrane//	cellular_component//
XLOC_007492	Solyc02g071520.2	SL2.50ch02:40917844-40921072	0.751754	0.737419	0	RAG1-activating protein 1 homolog (AHRD V1 **-- R1AP1_DICDI)%3B contains Interpro domain(s) IPR018179 RAG1-activating protein 1 homologue //	GO:0016021//	integral component of membrane//	cellular_component//
XLOC_031153	Solyc11g069220.1	SL2.50ch11:53855942-53863226	2.24671	0	0	MLO-like protein 3 (AHRD V1 ***- C6EWE6_VITVI)%3B contains Interpro domain(s) IPR004326 Mlo-related protein //	GO:0016021//	integral component of membrane//	cellular_component//
XLOC_020588	Solyc07g044990.2	SL2.50ch07:58050558-58057062	1.27058	0	0.901631	Transmembrane protein 56 (AHRD V1 ***- B6TI82_MAIZE)%3B contains Interpro domain(s) IPR006634 TRAM%2C LAG1 and CLN8 homology //	GO:0016021//	integral component of membrane//	cellular_component//
XLOC_030451	Solyc11g013000.1	SL2.50ch11:5850496-5854023	0	0	-0.644923	Transmembrane emp24 domain-containing protein 10 (AHRD V1 ***- B6SSF8_MAIZE)%3B contains Interpro domain(s) IPR000348 emp24/gp25L/p24 //	GO:0016021//	integral component of membrane//	cellular_component//
XLOC_020328	Solyc07g025510.2	SL2.50ch07:28737717-28740341	0.936216	0	0	Senescence-associated protein 5 (AHRD V1 ***- O81655_HEMSP)%3B contains Interpro domain(s) IPR000301 Tetraspanin%2C subgroup //	GO:0016021//	integral component of membrane//	cellular_component//
XLOC_011351	Solyc03g114480.2	SL2.50ch03:64469827-64471432	1.2251	0	0	Senescence-associated protein (AHRD V1 ***- B3TLS7_ELAGV)%3B contains Interpro domain(s) IPR018499 Tetraspanin //	GO:0016021//	integral component of membrane//	cellular_component//
XLOC_028721	Solyc10g085980.1	SL2.50ch10:64970486-64978438	0	0	0.520556	Integral membrane protein TerC (AHRD V1 ***- A9B4B1_HERA2)%3B contains Interpro domain(s) IPR005496 Integral membrane protein TerC //	GO:0016021//	integral component of membrane//	cellular_component//
XLOC_005443	Solyc02g036320.1	SL2.50ch02:30497912-30498104	-1.83871	0	0	Photosystem I P700 chlorophyll a apoprotein (AHRD V1 ***- Q15B79_TOBAC)%3B contains Interpro domain(s) IPR001280 Photosystem I psaA and psaB //	GO:0016021//	integral component of membrane//	cellular_component//
XLOC_006747	Solyc02g094440.2	SL2.50ch02:54967099-54969958	0	0	-0.557261	Translocon-associated protein subunit beta (AHRD V1 ***- C1C3L8_RANCA)%3B contains Interpro domain(s) IPR008856 Translocon-associated beta //	GO:0016021//	integral component of membrane//	cellular_component//
XLOC_013786	Solyc04g049090.2	SL2.50ch04:39552647-39558181	0	-0.902404	-0.484575	MLO-like protein 17 (AHRD V1 ***- C6EWF0_VITVI)%3B contains Interpro domain(s) IPR004326 Mlo-related protein //	GO:0016021//	integral component of membrane//	cellular_component//
XLOC_010659	Solyc03g059390.2	SL2.50ch03:29009789-29011889	0.893037	0	0	Senescence-associated protein 5 (AHRD V1 ***- O81655_HEMSP)%3B contains Interpro domain(s) IPR000301 Tetraspanin%2C subgroup //	GO:0016021//	integral component of membrane//	cellular_component//
XLOC_022236	Solyc07g063430.2	SL2.50ch07:65906788-65911069	0	0	0.90696	Mpv17 protein (AHRD V1 *--- B0WWR6_CULQU)%3B contains Interpro domain(s) IPR007248 Mpv17/PMP22 //	GO:0016021//	integral component of membrane//	cellular_component//
XLOC_018672	Solyc06g009940.1	SL2.50ch06:4357354-4357573	-1.79977	0	0	Photosystem I P700 chlorophyll a apoprotein A1 (AHRD V1 ***- D3WE64_9MAGN)%3B contains Interpro domain(s) IPR001280 Photosystem I psaA and psaB //	GO:0016021//	integral component of membrane//	cellular_component//
XLOC_031370	Solyc11g006290.1	SL2.50ch11:1022214-1023710	0	0	3.02297	3-oxo-5-alpha-steroid 4-dehydrogenase family protein (AHRD V1 ***- D7M7I5_ARALY)%3B contains Interpro domain(s) IPR001104 3-oxo-5-alpha-steroid 4-dehydrogenase%2C C-terminal //	GO:0016021//	integral component of membrane//	cellular_component//
XLOC_011651	Solyc03g120730.2	SL2.50ch03:69019760-69023783	0.543717	0	0	Os01g0786800 protein (Fragment) (AHRD V1 ***- Q0JIP0_ORYSJ)%3B contains Interpro domain(s) IPR002781 Protein of unknown function DUF81 //	GO:0016021//	integral component of membrane//	cellular_component//
XLOC_011100	Solyc03g097580.2	SL2.50ch03:59908321-59910086	3.34521	0	2.63625	MtN3-like protein (AHRD V1 **-- Q9LUE3_ARATH)%3B contains Interpro domain(s) IPR018179 RAG1-activating protein 1 homologue //	GO:0016021//	integral component of membrane//	cellular_component//
XLOC_011007	Solyc03g095650.2	SL2.50ch03:56833315-56841460	1.76051	0	2.47664	MLO-like protein 17 (AHRD V1 ***- C6EWF0_VITVI)%3B contains Interpro domain(s) IPR004326 Mlo-related protein //	GO:0016021//	integral component of membrane//	cellular_component//
XLOC_014052	Solyc04g064610.2	SL2.50ch04:55774259-55776094	-1.28779	0	0	RAG1-activating protein 1 homolog (AHRD V1 **-- R1AP1_DROPS)%3B contains Interpro domain(s) IPR018179 RAG1-activating protein 1 homologue //	GO:0016021//	integral component of membrane//	cellular_component//
XLOC_011101	Solyc03g097590.2	SL2.50ch03:59925732-59927601	2.16423	0	1.50014	MtN3-like protein (AHRD V1 **-- Q9LUE3_ARATH)%3B contains Interpro domain(s) IPR018179 RAG1-activating protein 1 homologue //	GO:0016021//	integral component of membrane//	cellular_component//
XLOC_034386	Solyc12g042530.1	SL2.50ch12:39993994-39999539	1.43797	0	1.26526	Glycosylphosphatidylinositol anchor biosynthesis protein 11 (AHRD V1 ***- B6SI00_MAIZE)%3B contains Interpro domain(s) IPR009580 GPI biosynthesis protein Pig-F //	GO:0016021//	integral component of membrane//	cellular_component//
XLOC_010239	Solyc03g007360.2	SL2.50ch03:1910344-1912252	1.31806	0	0	Nodulin MtN3 family protein (AHRD V1 **-- D7MSV3_ARALY)%3B contains Interpro domain(s) IPR018179 RAG1-activating protein 1 homologue //	GO:0016021//	integral component of membrane//	cellular_component//
XLOC_017295	Solyc06g010030.2	SL2.50ch06:4786680-4792828	1.93633	0	1.7132	MLO-like protein 3 (AHRD V1 ***- C6EWE6_VITVI)%3B contains Interpro domain(s) IPR004326 Mlo-related protein //	GO:0016021//	integral component of membrane//	cellular_component//
XLOC_018135	Solyc06g072630.2	SL2.50ch06:44791380-44793105	0	0	1.57551	MtN3-like protein (AHRD V1 **-- Q9LUE3_ARATH)%3B contains Interpro domain(s) IPR018179 RAG1-activating protein 1 homologue //	GO:0016021//	integral component of membrane//	cellular_component//
XLOC_032546	Solyc12g005910.1	SL2.50ch12:541661-547185	1.25164	0	0	B-cell receptor-associated protein 31-like containing protein (AHRD V1 ***- B6TG43_MAIZE)%3B contains Interpro domain(s) IPR008417 B-cell receptor-associated 31-like //	GO:0016021//	integral component of membrane//	cellular_component//
XLOC_029456	Solyc10g052740.1	SL2.50ch10:53322834-53323242	-2.94496	0	0	Photosystem I P700 chlorophyll a apoprotein A1 (AHRD V1 ***- D1L8N8_BRANA)%3B contains Interpro domain(s) IPR001280 Photosystem I psaA and psaB //	GO:0016021//	integral component of membrane//	cellular_component//
XLOC_019650	Solyc06g075360.2	SL2.50ch06:46774154-46779568	0	0	-0.673336	Senescence-associated protein (AHRD V1 ***- B6T9C5_MAIZE)%3B contains Interpro domain(s) IPR000301 Tetraspanin%2C subgroup //	GO:0016021//	integral component of membrane//	cellular_component//
XLOC_019258	Solyc06g065030.2	SL2.50ch06:40546198-40552787	0.905816	0	0	Transmembrane 9 superfamily protein member 3 (AHRD V1 ***- B6SY54_MAIZE)%3B contains Interpro domain(s) IPR004240 Nonaspanin (TM9SF) //	GO:0016021//	integral component of membrane//	cellular_component//
XLOC_008279	Solyc02g092100.1	SL2.50ch02:53308158-53308530	0	inf	0	Unknown Protein (AHRD V1)//	GO:0016021//	integral component of membrane//	cellular_component//
XLOC_005722	Solyc02g069350.2	SL2.50ch02:39263441-39273796	0	0.627457	0.653477	Transmembrane protein 56 (AHRD V1 ***- B6TI82_MAIZE)%3B contains Interpro domain(s) IPR006634 TRAM%2C LAG1 and CLN8 homology //	GO:0016021//	integral component of membrane//	cellular_component//
XLOC_023945	Solyc08g015870.2	SL2.50ch08:6173939-6178883	0.76322	0	0	MLO-like protein 7 (AHRD V1 ***- C6EWE8_VITVI)%3B contains Interpro domain(s) IPR004326 Mlo-related protein //	GO:0016021//	integral component of membrane//	cellular_component//
XLOC_031371	Solyc11g006300.1	SL2.50ch11:1024780-1026909	0.783123	1.66478	2.02481	3-oxo-5-alpha-steroid 4-dehydrogenase family protein (AHRD V1 ***- D7M7I5_ARALY)%3B contains Interpro domain(s) IPR001104 3-oxo-5-alpha-steroid 4-dehydrogenase%2C C-terminal //	GO:0016021//	integral component of membrane//	cellular_component//
XLOC_004515	Solyc01g099870.1	SL2.50ch01:90005488-90007750	1.04992	1.02083	0	RAG1-activating protein 1 homolog (AHRD V1 **-- R1AP1_DANRE)%3B contains Interpro domain(s) IPR018179 RAG1-activating protein 1 homologue //	GO:0016021//	integral component of membrane//	cellular_component//
XLOC_022227	Solyc07g063260.2	SL2.50ch07:65769154-65779557	0.896444	0	0	MLO-like protein 14 (AHRD V1 ***- B6SWK8_MAIZE)%3B contains Interpro domain(s) IPR004326 Mlo-related protein //	GO:0016021//	integral component of membrane//	cellular_component//
XLOC_018134	Solyc06g072620.2	SL2.50ch06:44786029-44787883	0	0	1.58753	MtN3-like protein (AHRD V1 **-- Q9LUE3_ARATH)%3B contains Interpro domain(s) IPR018179 RAG1-activating protein 1 homologue //	GO:0016021//	integral component of membrane//	cellular_component//
XLOC_011611	Solyc03g119820.1	SL2.50ch03:68391381-68391879	-1.9262	0	0	Oleosin Bn-V (AHRD V1 ***- B6UIA7_MAIZE)%3B contains Interpro domain(s) IPR000136 Oleosin //	GO:0016021//	integral component of membrane//	cellular_component//
XLOC_016416	Solyc05g020010.1	SL2.50ch05:25812493-25813044	-2.14798	0	0	Photosystem I P700 chlorophyll a apoprotein A2 (AHRD V1 *-*- D3WBY4_9MAGN)%3B contains Interpro domain(s) IPR001280 Photosystem I psaA and psaB //	GO:0016021//	integral component of membrane//	cellular_component//
XLOC_022203	Solyc07g062700.2	SL2.50ch07:65379889-65385114	1.73413	0	0	Sodium/calcium exchanger family protein (AHRD V1 ***- D7KKF3_ARALY)%3B contains Interpro domain(s) IPR004837 Sodium/calcium exchanger membrane region //	GO:0016021//	integral component of membrane//	cellular_component//
XLOC_001042	Solyc01g007370.2	SL2.50ch01:1858373-1859112	-2.86996	1.08814	0	Chloroplast envelope membrane protein A (AHRD V1 ***- D7KRA3_ARALY)%3B contains Interpro domain(s) IPR004282 CemA //	GO:0016021//	integral component of membrane//	cellular_component//
XLOC_027792	Solyc10g017890.1,Solyc10g017900.1	SL2.50ch10:6175596-6179558	-2.07912	0	0	Photosystem I P700 chlorophyll a apoprotein (AHRD V1 ***- B9RL07_RICCO)%3B contains Interpro domain(s) IPR001280 Photosystem I psaA and psaB //Photosystem I P700 chlorophyll a apoprotein (AHRD V1 ***- B9RL08_RICCO)%3B contains Interpro domain(s) IPR001280 Photosystem I psaA and psaB //	GO:0016021//GO:0016021//	integral component of membrane//integral component of membrane//	cellular_component//cellular_component//
XLOC_034599	Solyc12g032970.1,Solyc12g032980.1,Solyc12g033040.1,Solyc12g033050.1,Solyc12g033060.1,Solyc12g033070.1	SL2.50ch12:60947915-61005055	-2.63856	0	0	Photosystem I P700 chlorophyll a apoprotein A2 (AHRD V1 ***- D3WCK9_PHOSE)%3B contains Interpro domain(s) IPR001280 Photosystem I psaA and psaB //Photosystem I P700 chlorophyll a apoprotein A2 (AHRD V1 ***- B2LMJ2_GUIAB)%3B contains Interpro domain(s) IPR001280 Photosystem I psaA and psaB //Photosystem I P700 chlorophyll a apoprotein A1 (AHRD V1 ***- D2KLK3_OLEEU)%3B contains Interpro domain(s) I…	GO:0016021//GO:0016021//GO:0016021//GO:0016021//GO:0016021//GO:0016021//	integral component of membrane//integral component of membrane//integral component of membrane//integral component of membrane//integral component of membrane//integral component of membrane//	cellular_component//cellular_component//cellular_component//cellular_component//cellular_component//cellular_component//
XLOC_008095	Solyc02g088240.2,Solyc02g088250.2	SL2.50ch02:50399609-50403780	2.63741	0	0	Xenotropic and polytropic retrovirus receptor (AHRD V1 **-- B2GU54_XENTR)%3B contains Interpro domain(s) IPR004342 EXS%2C C-terminal //Xenotropic and polytropic retrovirus receptor (AHRD V1 *--- B2GU54_XENTR)%3B contains Interpro domain(s) IPR004331 SPX%2C N-terminal //	GO:0016021//no GOid	integral component of membrane//no GOterm//	cellular_component//no GO_branch//
XLOC_030512	Solyc11g017010.1	SL2.50ch11:7760826-7764617	0.780544	-1.04916	0	Sucrose transporter (AHRD V1 ***- A8E0N3_TOBAC)%3B contains Interpro domain(s) IPR005989 Sucrose/H+ symporter%2C plant //	GO:0005887//	integral component of plasma membrane//	cellular_component//
XLOC_001043	Solyc01g007380.1	SL2.50ch01:1859331-1860294	-2.93197	0	0	Apocytochrome f (AHRD V1 ***- D3WBH0_9AQUA)%3B contains Interpro domain(s) IPR002325 Cytochrome f //	GO:0031361//	integral component of thylakoid membrane//	cellular_component//
XLOC_022613	Solyc08g007970.2	SL2.50ch08:2471545-2478084	0.815685	0	0	SKIP interacting protein 24 (Fragment) (AHRD V1 *--- B8Q8B0_ORYSI)%3B contains Interpro domain(s) IPR006141 Intein splicing site //	GO:0016539//	intein-mediated protein splicing//	biological_process//
XLOC_033750	Solyc12g005020.1	SL2.50ch12:10617-11752	-2.10007	0	-0.83669	Ring H2 finger protein (AHRD V1 *-*- D9ZHD8_HYPPE)%3B contains Interpro domain(s) IPR018957 Zinc finger%2C C3HC4 RING-type //	GO:0005141//	interleukin-10 receptor binding//	molecular_function//
XLOC_008109	Solyc02g088560.2	SL2.50ch02:50608219-50616679	0.761979	0	0	Cyclic nucleotide gated channel (AHRD V1 **** A9CRE4_MALDO)%3B contains Interpro domain(s) IPR000595 Cyclic nucleotide-binding //	GO:0005222//	intracellular cAMP activated cation channel activity//	molecular_function//
XLOC_017810	Solyc06g063190.2	SL2.50ch06:39912365-39916139	1.62179	0	1.20629	Glutamate-gated kainate-type ion channel receptor subunit GluR5 (AHRD V1 **** B9HB97_POPTR)%3B contains Interpro domain(s) IPR017103 Ionotropic glutamate-like receptor%2C plant //	GO:0005217//	intracellular ligand-gated ion channel activity//	molecular_function//
XLOC_017812	Solyc06g063210.2	SL2.50ch06:39926107-39929610	1.57682	0	0	Glutamate-gated kainate-type ion channel receptor subunit GluR5 (AHRD V1 **** B9HB97_POPTR)%3B contains Interpro domain(s) IPR017103 Ionotropic glutamate-like receptor%2C plant //	GO:0005217//	intracellular ligand-gated ion channel activity//	molecular_function//
XLOC_020700	Solyc07g052390.2	SL2.50ch07:60903353-60908319	0	0.60004	0	Glutamate-gated kainate-type ion channel receptor subunit GluR5 (AHRD V1 **** B9GU65_POPTR)%3B contains Interpro domain(s) IPR017103 Ionotropic glutamate-like receptor%2C plant //	GO:0005217//	intracellular ligand-gated ion channel activity//	molecular_function//
XLOC_014031	Solyc04g063280.2	SL2.50ch04:55403036-55416778	0.547467	0	0	Vacuolar protein sorting-associated protein 27 (AHRD V1 *--- B2W9Q9_PYRTR)%3B contains Interpro domain(s) IPR018205 VHS subgroup //	GO:0006886//	intracellular protein transport//	biological_process//
XLOC_019693	Solyc06g076360.2	SL2.50ch06:47441564-47445928	-1.00993	0	0	Outer envelope membrane protein (AHRD V1 **-- Q31PR1_SYNE7)%3B contains Interpro domain(s) IPR005689 Chloroplast envelope protein translocase%2C IAP75 //	GO:0006886//	intracellular protein transport//	biological_process//
XLOC_011275	Solyc03g112820.2	SL2.50ch03:63130316-63135688	-0.897449	0	0	U3 small nucleolar ribonucleoprotein protein MPP10 (AHRD V1 *-*- B0WQ74_CULQU)%3B contains Interpro domain(s) IPR012173 U3 small nucleolar ribonucleoprotein complex%2C subunit Mpp10p //	GO:0030529//	intracellular ribonucleoprotein complex//	cellular_component//
XLOC_033489	Solyc12g088390.1	SL2.50ch12:63797886-63798489	0	-1.03591	0	Zinc-finger protein (AHRD V1 ***- Q40899_PETHY)%3B contains Interpro domain(s) IPR007087 Zinc finger%2C C2H2-type //	GO:0005622//	intracellular//	cellular_component//
XLOC_024790	Solyc08g081290.2	SL2.50ch08:64349736-64355644	0.719012	0	0	ARID/BRIGHT DNA-binding domain-containing protein/ELM2 domain-containing protein/Myb-like DNA-binding domain-containing protein (AHRD V1 *--- Q1PEA0_ARATH)%3B contains Interpro domain(s) IPR001606 AT-rich interaction region //	GO:0005622//	intracellular//	cellular_component//
XLOC_026373	Solyc09g009970.2	SL2.50ch09:3418543-3423024	-0.964087	0	0	Rho GTPase activating protein 2 (AHRD V1 *-*- Q6UQ72_ORYSJ)%3B contains Interpro domain(s) IPR000198 RhoGAP //	GO:0005622//	intracellular//	cellular_component//
XLOC_024357	Solyc08g067180.2	SL2.50ch08:56155195-56157583	-1.09435	0	0	Zinc finger (Ran-binding) family protein (AHRD V1 *-*- D7L4W6_ARALY)%3B contains Interpro domain(s) IPR001876 Zinc finger%2C RanBP2-type //	GO:0005622//	intracellular//	cellular_component//
XLOC_029780	Solyc10g080600.1	SL2.50ch10:61817024-61817850	0	0	0.988957	Zinc finger-like protein (AHRD V1 ***- Q9M2P1_ARATH)%3B contains Interpro domain(s) IPR007087 Zinc finger%2C C2H2-type //	GO:0005622//	intracellular//	cellular_component//
XLOC_030460	Solyc11g013220.1	SL2.50ch11:6128094-6131640	-2.17968	0	0	Os04g0690100 protein (Fragment) (AHRD V1 ***- Q0J8S4_ORYSJ)//	GO:0005622//	intracellular//	cellular_component//
XLOC_023051	Solyc08g063040.2	SL2.50ch08:52578023-52581053	0.657106	0	0.704692	Zinc finger protein (AHRD V1 *-*- Q9LVQ7_ARATH)%3B contains Interpro domain(s) IPR007087 Zinc finger%2C C2H2-type //	GO:0005622//	intracellular//	cellular_component//
XLOC_007679	Solyc02g079430.2	SL2.50ch02:43996567-43997652	0	0	0.9357	CONSTANS-like zinc finger protein (AHRD V1 *--- D0EP04_SOYBN)%3B contains Interpro domain(s) IPR000315 Zinc finger%2C B-box //	GO:0005622//	intracellular//	cellular_component//
XLOC_011935	Solyc04g007470.2	SL2.50ch04:1145331-1149372	-1.49125	1.68471	1.27063	CONSTANS-like zinc finger protein (AHRD V1 *--- D0EP07_SOYBN)%3B contains Interpro domain(s) IPR000315 Zinc finger%2C B-box //	GO:0005622//	intracellular//	cellular_component//
XLOC_009005	Solyc03g059270.2	SL2.50ch03:28242568-28244769	1.16565	0	0	Zinc finger protein (AHRD V1 **-- D7KHP2_ARALY)%3B contains Interpro domain(s) IPR007087 Zinc finger%2C C2H2-type //	GO:0005622//	intracellular//	cellular_component//
XLOC_033528	Solyc12g089240.1	SL2.50ch12:64351467-64353840	1.03405	0	0	Zinc finger protein CONSTANS-LIKE 3 (AHRD V1 *--- COL3_ARATH)%3B contains Interpro domain(s) IPR000315 Zinc finger%2C B-box //	GO:0005622//	intracellular//	cellular_component//
XLOC_024359	Solyc08g067240.2	SL2.50ch08:56264501-56272294	-1.0834	0	0	DNA topoisomerase 2-binding protein 1 (AHRD V1 *--- TOPB1_MOUSE)%3B contains Interpro domain(s) IPR001357 BRCT //	GO:0005622//	intracellular//	cellular_component//
XLOC_027585	Solyc10g006440.2	SL2.50ch10:1045467-1054965	0	0	0.79421	TBC1 domain family member 17 (AHRD V1 *--- Q0V9K4_XENTR)%3B contains Interpro domain(s) IPR000195 RabGAP/TBC //	GO:0005622//	intracellular//	cellular_component//
XLOC_025820	Solyc09g074340.2	SL2.50ch09:66141002-66146482	-0.91296	0	0	Rho GTPase activating protein 2 (AHRD V1 *-*- Q6UQ72_ORYSJ)%3B contains Interpro domain(s) IPR000198 RhoGAP //	GO:0005622//	intracellular//	cellular_component//
XLOC_032428	Solyc11g073060.1	SL2.50ch11:56172036-56172501	2.33327	0	0	Zinc finger family protein (AHRD V1 ***- D7LJS8_ARALY)%3B contains Interpro domain(s) IPR007087 Zinc finger%2C C2H2-type //	GO:0005622//	intracellular//	cellular_component//
XLOC_031155	Solyc11g069240.1	SL2.50ch11:53873153-53878403	-1.97633	0	0	Zinc finger family protein (AHRD V1 **-- D7M7Z8_ARALY)%3B contains Interpro domain(s) IPR007087 Zinc finger%2C C2H2-type //	GO:0005622//	intracellular//	cellular_component//
XLOC_009359	Solyc03g095610.2	SL2.50ch03:56789610-56793664	0.617424	0	0.686515	Unknown Protein (AHRD V1)//	GO:0005622//	intracellular//	cellular_component//
XLOC_033782	Solyc12g005660.1	SL2.50ch12:351056-351746	-0.709463	0	0.934121	CONSTANS-like zinc finger protein (AHRD V1 *-*- D0EP04_SOYBN)%3B contains Interpro domain(s) IPR000315 Zinc finger%2C B-box //	GO:0005622//	intracellular//	cellular_component//
XLOC_020741	Solyc07g053140.2	SL2.50ch07:61593134-61594431	0	0.619353	1.04898	CONSTANS-like zinc finger protein (AHRD V1 *-*- D0EP07_SOYBN)%3B contains Interpro domain(s) IPR000315 Zinc finger%2C B-box //	GO:0005622//	intracellular//	cellular_component//
XLOC_032518	Solyc12g005220.1,Solyc12g005230.1	SL2.50ch12:140992-154107	0.861554	0	1.03195	TBC1 domain family member 17 (AHRD V1 *--- Q0V9K4_XENTR)%3B contains Interpro domain(s) IPR000195 RabGAP/TBC //Breast carcinoma amplified sequence 3 (Fragment) (AHRD V1 *--- B1AR77_MOUSE)%3B contains Interpro domain(s) IPR010847 Harpin-induced 1 //	GO:0005622//no GOid	intracellular//no GOterm//	cellular_component//no GO_branch//
XLOC_006271	Solyc02g084420.2,Solyc02g084430.2	SL2.50ch02:47529604-47532719	0	0	0.69671	Zinc finger protein CONSTANS-LIKE 2 (AHRD V1 **-- COL2_ARATH)%3B contains Interpro domain(s) IPR000315 Zinc finger%2C B-box //COL domain class transcription factor (AHRD V1 ***- D9ZIX1_MALDO)//	GO:0005622//no GOid	intracellular//no GOterm//	cellular_component//no GO_branch//
XLOC_026037	Solyc09g090900.2	SL2.50ch09:70308263-70313045	2.09088	0	0	3-isopropylmalate dehydratase large subunit 2 (AHRD V1 **** B6U6T6_MAIZE)%3B contains Interpro domain(s) IPR006251 Homoaconitase/3-isopropylmalate dehydratase%2C large subunit%2C subgroup //	GO:0050486//	intramolecular transferase activity, transferring hydroxy groups//	molecular_function//
XLOC_032573	Solyc12g006530.1	SL2.50ch12:1041050-1049001	1.10293	-0.586688	0.60424	Cycloartenol synthase (AHRD V1 ***- D7LA92_ARALY)%3B contains Interpro domain(s) IPR018333 Squalene cyclase //	GO:0016866//	intramolecular transferase activity//	molecular_function//
XLOC_031448	Solyc11g007770.1	SL2.50ch11:1988059-1993338	0	-0.609323	0	Exostosin-2 (AHRD V1 *-*- Q0IFF4_AEDAE)%3B contains Interpro domain(s) IPR015338 EXTL2%2C alpha-1%2C4-N-acetylhexosaminyltransferase //	GO:0031227//	intrinsic component of endoplasmic reticulum membrane//	cellular_component//
XLOC_023596	Solyc08g081260.1	SL2.50ch08:64319902-64323568	-0.858555	0	0	Tir-nbs resistance protein (AHRD V1 **-- B9GWT3_POPTR)%3B contains Interpro domain(s) IPR000157 Toll-Interleukin receptor //	GO:0031224//	intrinsic component of membrane//	cellular_component//
XLOC_034832	Solyc12g097000.1,Solyc12g097010.1	SL2.50ch12:65684153-65690047	1.55268	0	0	Tir%2C resistance protein fragment//Lrr%2C resistance protein fragment//	GO:0031224//GO:0030275//	intrinsic component of membrane//LRR domain binding//	cellular_component//molecular_function//
XLOC_005421	Solyc02g032640.1,Solyc02g032650.2	SL2.50ch02:28903047-28910809	0.996102	0	0.972415	Tir%2C resistance protein fragment//Nbs-lrr%2C resistance protein//	GO:0031224//GO:0030275//	intrinsic component of membrane//LRR domain binding//	cellular_component//molecular_function//
XLOC_004660	Solyc01g104030.2	SL2.50ch01:92494272-92499952	0.572231	0	0	Inward rectifier potassium channel-like protein (Fragment) (AHRD V1 *-** Q1W7D1_SOLLC)%3B contains Interpro domain(s) IPR000595 Cyclic nucleotide-binding //	GO:0005242//	inward rectifier potassium channel activity//	molecular_function//
XLOC_009468	Solyc03g097940.2	SL2.50ch03:60321466-60332404	0.833288	-1.04144	0	Potassium channel (AHRD V1 **** O04242_MAIZE)%3B contains Interpro domain(s) IPR002110 Ankyrin //	GO:0005242//	inward rectifier potassium channel activity//	molecular_function//
XLOC_014230	Solyc04g076300.2	SL2.50ch04:61214882-61223055	0	0	-0.736552	Transporter small conductance mechanosensitive ion channel (MscS) family (AHRD V1 *-** A7ZLG1_ECO24)%3B contains Interpro domain(s) IPR006685 Mechanosensitive ion channel MscS //	GO:0005216//	ion channel activity//	molecular_function//
XLOC_027634	Solyc10g007670.2	SL2.50ch10:1944124-1948986	-0.573174	0	0	Unknown Protein (AHRD V1)%3B contains Interpro domain(s) IPR001075 NIF system FeS cluster assembly%2C NifU%2C C-terminal //	GO:0016226//	iron-sulfur cluster assembly//	biological_process//
XLOC_012303	Solyc04g040160.2	SL2.50ch04:11970924-11976173	0	0	0.820258	Pheophorbide a oxygenase (AHRD V1 **-* B6ST74_MAIZE)%3B contains Interpro domain(s) IPR013626 Pheophorbide a oxygenase //	GO:0051536//	iron-sulfur cluster binding//	molecular_function//
XLOC_006813	Solyc02g011760.1	SL2.50ch02:13779452-13780297	0	inf	0	Photosystem I iron-sulfur center (AHRD V1 *-*- D3WCL0_PHOSE)%3B contains Interpro domain(s) IPR001450 4Fe-4S ferredoxin%2C iron-sulphur binding%2C subgroup //	GO:0051536//	iron-sulfur cluster binding//	molecular_function//
XLOC_010132	Solyc03g005190.2	SL2.50ch03:115978-117377	-0.537204	0	0	Ferredoxin (AHRD V1 *-*- Q8LD29_ARATH)%3B contains Interpro domain(s) IPR010241 Ferredoxin [2Fe-2S]%2C plant //	GO:0051536//	iron-sulfur cluster binding//	molecular_function//
XLOC_023382	Solyc08g077050.2	SL2.50ch08:60988722-60993807	-1.06147	0	0	Ferredoxin family protein (AHRD V1 ***- D7KHL5_ARALY)%3B contains Interpro domain(s) IPR010241 Ferredoxin [2Fe-2S]%2C plant //	GO:0051536//	iron-sulfur cluster binding//	molecular_function//
XLOC_023708	Solyc08g083360.2	SL2.50ch08:65830570-65831740	-1.03176	0	0	Ferredoxin (AHRD V1 *-*- D8FXV1_9CYAN)%3B contains Interpro domain(s) IPR001041 Ferredoxin //	GO:0051536//	iron-sulfur cluster binding//	molecular_function//
XLOC_026133	Solyc09g097810.2	SL2.50ch09:71806311-71807307	1.37493	0	0	SAR8.2 protein (AHRD V1 ***- Q947G5_CAPAN)%3B contains Interpro domain(s) IPR004297 Systemic acquired resistance protein SAR //	GO:0051536//	iron-sulfur cluster binding//	molecular_function//
XLOC_016973	Solyc05g055760.2	SL2.50ch05:65269466-65272777	0.7527	0	0	Isopentenyl-diphosphate delta-isomerase (AHRD V1 **** Q84RZ8_9GENT)%3B contains Interpro domain(s) IPR011876 Isopentenyl-diphosphate delta-isomerase%2C type 1 //	GO:0004452//	isopentenyl-diphosphate delta-isomerase activity//	molecular_function//
XLOC_019565	Solyc06g073560.2	SL2.50ch06:45355089-45359188	0	0	-1.1035	Isovaleryl-CoA dehydrogenase (AHRD V1 **** Q0MX57_BETVU)%3B contains Interpro domain(s) IPR009100 Acyl-CoA dehydrogenase/oxidase%2C middle and N-terminal //	GO:0008470//	isovaleryl-CoA dehydrogenase activity//	molecular_function//
XLOC_008237	Solyc02g091140.2	SL2.50ch02:52547807-52549571	1.21103	0	1.28535	S-adenosyl-L-methionine carboxyl methyltransferase family protein (AHRD V1 **** D7KVS6_ARALY)%3B contains Interpro domain(s) IPR005299 SAM dependent carboxyl methyltransferase //	GO:0030795//	jasmonate O-methyltransferase activity//	molecular_function//
XLOC_022044	Solyc07g054580.2	SL2.50ch07:62854899-62858806	0	0	-0.637434	GH3 family protein (AHRD V1 ***- B9N2A3_POPTR)%3B contains Interpro domain(s) IPR004993 GH3 auxin-responsive promoter //	GO:0080123//	jasmonate-amino synthetase activity//	molecular_function//
XLOC_028982	Solyc10g011650.2,Solyc10g011660.2	SL2.50ch10:3876347-3905499	1.16976	-0.64002	0	GH3 family protein (AHRD V1 ***- B9GQG9_POPTR)%3B contains Interpro domain(s) IPR004993 GH3 auxin-responsive promoter //GH3 family protein (AHRD V1 ***- B9GQG9_POPTR)%3B contains Interpro domain(s) IPR004993 GH3 auxin-responsive promoter //	GO:0080123//GO:0080123//	jasmonate-amino synthetase activity//jasmonate-amino synthetase activity//	molecular_function//molecular_function//
XLOC_033894	Solyc12g009020.1	SL2.50ch12:2319477-2326015	0.655746	0	0	Protein kinase (AHRD V1 **** C4Q4E0_SCHMA)%3B contains Interpro domain(s) IPR002290 Serine/threonine protein kinase //	GO:0008545//	JUN kinase kinase activity//	molecular_function//
XLOC_006570	Solyc02g090970.1	SL2.50ch02:52424626-52425709	0.821679	0	-1.00436	Serine/threonine-protein kinase 24 (AHRD V1 **** STK24_MOUSE)%3B contains Interpro domain(s) IPR002290 Serine/threonine protein kinase //	GO:0008545//	JUN kinase kinase activity//	molecular_function//
XLOC_009941	Solyc03g119490.2	SL2.50ch03:68085035-68088176	0	0.866971	0	Protein kinase (AHRD V1 **** C4Q4E0_SCHMA)%3B contains Interpro domain(s) IPR002290 Serine/threonine protein kinase //	GO:0008545//	JUN kinase kinase activity//	molecular_function//
XLOC_029603	Solyc10g075040.1	SL2.50ch10:58736235-58740441	0.540802	0	0	Receptor-like protein kinase At3g21340 (AHRD V1 *-** RLK6_ARATH)%3B contains Interpro domain(s) IPR002290 Serine/threonine protein kinase //	GO:0016301//	kinase activity//	molecular_function//
XLOC_003010	Solyc01g005870.1	SL2.50ch01:581433-584573	1.68804	0	0	LRR receptor-like serine/threonine-protein kinase%2C RLP//	GO:0016301//	kinase activity//	molecular_function//
XLOC_007339	Solyc02g068660.1	SL2.50ch02:38611460-38614191	0	0	-0.724162	Receptor-like protein kinase At3g21340 (AHRD V1 *-** RLK6_ARATH)%3B contains Interpro domain(s) IPR002290 Serine/threonine protein kinase //	GO:0016301//	kinase activity//	molecular_function//
XLOC_009305	Solyc03g093380.1	SL2.50ch03:54647723-54654977	-1.02174	0	0	Receptor like kinase%2C RLK//	GO:0016301//	kinase activity//	molecular_function//
XLOC_000969	Solyc01g005760.2	SL2.50ch01:496464-499371	2.20928	0	1.46856	LRR receptor-like serine/threonine-protein kinase%2C RLP//	GO:0016301//	kinase activity//	molecular_function//
XLOC_013063	Solyc04g079420.2	SL2.50ch04:63928053-63931605	1.22318	-0.533766	1.01132	Nbs-lrr%2C resistance protein//	GO:0016301//	kinase activity//	molecular_function//
XLOC_025737	Solyc09g065570.2	SL2.50ch09:63725315-63730478	0	0	-0.84319	Serine/threonine kinase (AHRD V1 *-** C4QNN2_SCHMA)%3B contains Interpro domain(s) IPR002290 Serine/threonine protein kinase //	GO:0016301//	kinase activity//	molecular_function//
XLOC_002360	Solyc01g098690.2	SL2.50ch01:89112090-89115191	2.59501	0	0	LRR receptor-like serine/threonine-protein kinase%2C RLP//	GO:0016301//	kinase activity//	molecular_function//
XLOC_024629	Solyc08g077740.1	SL2.50ch08:61639721-61643094	2.40052	0	0	LRR receptor-like serine/threonine-protein kinase%2C RLP//	GO:0016301//	kinase activity//	molecular_function//
XLOC_013629	Solyc04g039730.2	SL2.50ch04:12725112-12730431	-0.582059	0	0	Receptor like kinase%2C RLK//	GO:0016301//	kinase activity//	molecular_function//
XLOC_033917	Solyc12g009520.1	SL2.50ch12:2776576-2779468	2.11847	0	0	LRR receptor-like serine/threonine-protein kinase%2C RLP//	GO:0016301//	kinase activity//	molecular_function//
XLOC_018826	Solyc06g036080.2	SL2.50ch06:25466254-25477184	0	0	0.781027	Protein serine/threonine kinase (AHRD V1 *-** D3BP85_POLPA)%3B contains Interpro domain(s) IPR002290 Serine/threonine protein kinase //	GO:0016301//	kinase activity//	molecular_function//
XLOC_032697	Solyc12g009770.1	SL2.50ch12:2985863-2989574	2.24944	0	1.04933	LRR receptor-like serine/threonine-protein kinase%2C RLP//	GO:0016301//	kinase activity//	molecular_function//
XLOC_024963	Solyc09g005000.1	SL2.50ch09:6032-8057	1.51349	0	0	Receptor like protein kinase (AHRD V1 **** Q39139_ARATH)%3B contains Interpro domain(s) IPR001220 Legume lectin%2C beta chain //	GO:0016301//	kinase activity//	molecular_function//
XLOC_021078	Solyc07g065120.2	SL2.50ch07:67018960-67026140	1.19464	0	0	Glycerophosphoryl diester phosphodiesterase family protein (AHRD V1 ***- D7MKI0_ARALY)%3B contains Interpro domain(s) IPR017946 PLC-like phosphodiesterase%2C TIM beta/alpha-barrel domain //	GO:0016301//	kinase activity//	molecular_function//
XLOC_008186	Solyc02g090110.2	SL2.50ch02:51729762-51735875	1.05304	0	0	Receptor-like kinase (AHRD V1 *-** A7VM25_MARPO)%3B contains Interpro domain(s) IPR002290 Serine/threonine protein kinase //	GO:0016301//	kinase activity//	molecular_function//
XLOC_024967	Solyc09g005090.1	SL2.50ch09:55477-58639	1.25863	0	0	LRR receptor-like serine/threonine-protein kinase%2C RLP//	GO:0016301//	kinase activity//	molecular_function//
XLOC_014372	Solyc04g079400.2	SL2.50ch04:63910314-63915179	1.25478	0	0	Protein serine/threonine kinase (AHRD V1 *-** D3BP85_POLPA)%3B contains Interpro domain(s) IPR002290 Serine/threonine protein kinase //	GO:0016301//	kinase activity//	molecular_function//
XLOC_033725	Solyc12g100010.1,Solyc12g100020.1,Solyc12g100030.1	SL2.50ch12:66918120-66933308	1.0887	0	0	LRR receptor-like serine/threonine-protein kinase%2C RLP//LRR receptor-like serine/threonine-protein kinase%2C RLP//LRR receptor-like serine/threonine-protein kinase%2C RLP//	GO:0016301//GO:0016301//GO:0004675//	kinase activity//kinase activity//transmembrane receptor protein serine/threonine kinase activity//	molecular_function//molecular_function//molecular_function//
XLOC_001147	Solyc01g009690.1,Solyc01g009700.1	SL2.50ch01:3972591-3981907	2.43098	0	1.70513	LRR receptor-like serine/threonine-protein kinase%2C RLP//LRR receptor-like serine/threonine-protein kinase%2C RLP//	GO:0016301//GO:0004675//	kinase activity//transmembrane receptor protein serine/threonine kinase activity//	molecular_function//molecular_function//
XLOC_020467	Solyc07g041730.2	SL2.50ch07:54075711-54079469	1.22056	0	0	Mps one binder kinase activator-like 1A (AHRD V1 **** B6TBL6_MAIZE)%3B contains Interpro domain(s) IPR005301 Mob1/phocein //	GO:0019900//	kinase binding//	molecular_function//
XLOC_023335	Solyc08g075960.2	SL2.50ch08:60037420-60047282	0.883271	0	0	Mps one binder kinase activator-like 1A (AHRD V1 **** B6U9F2_MAIZE)%3B contains Interpro domain(s) IPR005301 Mob1/phocein //	GO:0019900//	kinase binding//	molecular_function//
XLOC_013216	Solyc04g082710.2	SL2.50ch04:66298254-66299698	-0.725755	0	0	Cathepsin B-like cysteine proteinase 3 (AHRD V1 **-- CPR3_CAEEL)%3B contains Interpro domain(s) IPR013128 Peptidase C1A%2C papain //	GO:0030984//	kininogen binding//	molecular_function//
XLOC_005896	Solyc02g077040.2	SL2.50ch02:42112776-42114420	2.54321	0	1.03228	Cathepsin B-like cysteine proteinase 5 (AHRD V1 **-* CPR5_CAEEL)%3B contains Interpro domain(s) IPR013128 Peptidase C1A%2C papain //	GO:0030984//	kininogen binding//	molecular_function//
XLOC_014989	Solyc05g013380.2	SL2.50ch05:6449636-6457997	0	0	1.16721	Alanine aminotransferase 2 (AHRD V1 **** A8IKE5_SOYBN)%3B contains Interpro domain(s) IPR004839 Aminotransferase%2C class I and II //	GO:0004021//	L-alanine:2-oxoglutarate aminotransferase activity//	molecular_function//
XLOC_012059	Solyc04g009960.2,Solyc04g009970.2	SL2.50ch04:3278327-3293170	0	-0.709398	0	L-allo-threonine aldolase (AHRD V1 **** D7RJ69_CARPA)%3B contains Interpro domain(s) IPR001597 Aromatic amino acid beta-eliminating lyase/threonine aldolase //Zinc ion binding protein (AHRD V1 ***- D7MH91_ARALY)%3B contains Interpro domain(s) IPR007527 Zinc finger%2C SWIM-type //	GO:0008732//GO:0008270//	L-allo-threonine aldolase activity//zinc ion binding//	molecular_function//molecular_function//
XLOC_030533	Solyc11g018550.2	SL2.50ch11:8668546-8677391	-0.609699	0	0	Thylakoid-bound ascorbate peroxidase 6//	GO:0016688//	L-ascorbate peroxidase activity//	molecular_function//
XLOC_006233	Solyc02g083620.2	SL2.50ch02:46962940-46966740	-0.649477	0	0	Ascorbate peroxidase (AHRD V1 **** Q39780_GOSHI)%3B contains Interpro domain(s) IPR002207 Plant ascorbate peroxidase //	GO:0016688//	L-ascorbate peroxidase activity//	molecular_function//
XLOC_007536	Solyc02g072500.2	SL2.50ch02:41682623-41686998	0	0.698679	0	Nucleobase ascorbate transporter (AHRD V1 **-* B9I1J7_POPTR)%3B contains Interpro domain(s) IPR006043 Xanthine/uracil/vitamin C permease //	GO:0015229//	L-ascorbic acid transporter activity//	molecular_function//
XLOC_019469	Solyc06g071330.2	SL2.50ch06:43890510-43899966	-1.27999	0	0	Nucleobase ascorbate transporter (AHRD V1 **-* B9I369_POPTR)%3B contains Interpro domain(s) IPR006043 Xanthine/uracil/vitamin C permease //	GO:0015229//	L-ascorbic acid transporter activity//	molecular_function//
XLOC_014373	Solyc04g079430.2	SL2.50ch04:63932410-63939582	0.928167	0	0	Nucleobase ascorbate transporter (AHRD V1 **-* B9I1J7_POPTR)%3B contains Interpro domain(s) IPR006043 Xanthine/uracil/vitamin C permease //	GO:0015229//	L-ascorbic acid transporter activity//	molecular_function//
XLOC_010784	Solyc03g013160.2	SL2.50ch03:47050217-47052464	1.62597	1.486	0.858371	Amino acid transporter family protein (AHRD V1 **** D7M7A7_ARALY)%3B contains Interpro domain(s) IPR013057 Amino acid transporter%2C transmembrane //	GO:0015188//	L-isoleucine transmembrane transporter activity//	molecular_function//
XLOC_010559	Solyc03g071590.2	SL2.50ch03:18243053-18259019	0	0	0.608216	Malate dehydrogenase (AHRD V1 **** Q5NE17_SOLLC)%3B contains Interpro domain(s) IPR011273 Malate dehydrogenase%2C NADP-dependent%2C plants //	GO:0030060//	L-malate dehydrogenase activity//	molecular_function//
XLOC_005939	Solyc02g077910.2	SL2.50ch02:42738317-42742122	-1.03187	0	0	Mitochondrial ornithine carrier protein (AHRD V1 **** B6K278_SCHJY)%3B contains Interpro domain(s) IPR018108 Mitochondrial substrate/solute carrier //	GO:0000064//	L-ornithine transmembrane transporter activity//	molecular_function//
XLOC_017764	Solyc06g061170.2	SL2.50ch06:39176370-39180613	-1.22834	0	-0.875294	Solute carrier family 25 (Mitochondrial carrier ornithine transporter) member 15 (AHRD V1 **** Q2KHW4_BOVIN)%3B contains Interpro domain(s) IPR002067 Mitochondrial carrier protein //	GO:0000064//	L-ornithine transmembrane transporter activity//	molecular_function//
XLOC_032221	Solyc11g066890.1	SL2.50ch11:52689012-52690296	-0.988476	0	0	Prephenate dehydratase (AHRD V1 ***- Q6JJ29_IPOTF)%3B contains Interpro domain(s) IPR001086 Prephenate dehydratase //	GO:0009094//	L-phenylalanine biosynthetic process//	biological_process//
XLOC_016833	Solyc05g052830.2	SL2.50ch05:62996788-63002842	-1.66164	0	0	Proline transporter 2 (AHRD V1 **** Q9XE49_SOLLC)%3B contains Interpro domain(s) IPR013057 Amino acid transporter%2C transmembrane //	GO:0015193//	L-proline transmembrane transporter activity//	molecular_function//
XLOC_011043	Solyc03g096390.2	SL2.50ch03:58462281-58466941	0.667076	0	0	Amino acid permease-like protein proline transporter-like protein (AHRD V1 **** Q9FJ34_ARATH)%3B contains Interpro domain(s) IPR013057 Amino acid transporter%2C transmembrane //	GO:0015193//	L-proline transmembrane transporter activity//	molecular_function//
XLOC_025103	Solyc09g008670.2	SL2.50ch09:2123839-2127943	0	0	-1.58924	Threonine ammonia-lyase biosynthetic (AHRD V1 **** B1XNT1_SYNP2)%3B contains Interpro domain(s) IPR000634 Serine/threonine dehydratase%2C pyridoxal-phosphate-binding site IPR005787 Threonine dehydratase I //	GO:0004794//	L-threonine ammonia-lyase activity//	molecular_function//
XLOC_029666	Solyc10g078470.1	SL2.50ch10:60285953-60288161	0.803145	0	0	Tyrosine-specific transport protein (AHRD V1 *-** D7DFI8_CHLTL)%3B contains Interpro domain(s) IPR018227 Tryptophan/tyrosine permease //	GO:0005302//	L-tyrosine transmembrane transporter activity//	molecular_function//
XLOC_021993	Solyc07g053720.2	SL2.50ch07:62141058-62145038	0.920765	0	0.877221	Tyrosine aminotransferase-like protein (AHRD V1 **** Q9LVY1_ARATH)%3B contains Interpro domain(s) IPR005958 Tyrosine/nicotianamine aminotransferase //	GO:0004838//	L-tyrosine:2-oxoglutarate aminotransferase activity//	molecular_function//
XLOC_028913	Solyc10g008200.2	SL2.50ch10:2315210-2319689	-1.16565	0	0.886296	Tyrosine aminotransferase (AHRD V1 **** D3K4J1_PAPSO)%3B contains Interpro domain(s) IPR005958 Tyrosine/nicotianamine aminotransferase //	GO:0004838//	L-tyrosine:2-oxoglutarate aminotransferase activity//	molecular_function//
XLOC_028864	Solyc10g007110.2	SL2.50ch10:1508115-1511280	0	0	1.20214	Tyrosine aminotransferase (AHRD V1 **** Q8GUE9_SOLSC)%3B contains Interpro domain(s) IPR005958 Tyrosine/nicotianamine aminotransferase //	GO:0004838//	L-tyrosine:2-oxoglutarate aminotransferase activity//	molecular_function//
[truncated: 4,568 more rows]

## Sheet: ethylene-related genes
Ethylene biosynthesis
!gene_id	gene	locus	V versus C	M versus C	MV versus C	description	GOid	Goterm	GO_branch
[truncated: 60 more rows]

## Sheet: auxin-related genes
Auxin biosynthesis
!gene_id	gene	locus	V	M	MV
[truncated: 87 more rows]

## Sheet: gibberellins-related genes
Gibberellins biosynthesis
[truncated: 21 more rows]

## Sheet: abscisic acid genes
Abscisic acid biosynthesis
[truncated: 17 more rows]

[truncated: 4 more sheets: jasmonate-related genes, salicylic acid-related genes, ROS, TFs]
