# Supplementary material for: Arbuscular Mycorrhizal Symbiosis Primes Tolerance to Cucumber Mosaic Virus in Tomato
Source: Viruses. 2020 Jun 22;12(6):675. doi: 10.3390/v12060675 (PMC7354615; doi:10.3390/v12060675)
Supplement: Supplementary file 1 [file viruses-12-00675-s001.zip › TableS10.xlsx]

## Sheet: Table S10
	Table S10
	List of MAPMAN categories enriched among DEGs (p-value<0.05)

## Sheet: mapman_enrichment_V_vs_C
bin	name	elements	p-value
20	stress	299	4.5e-13
20.1	stress.biotic	179	<1E-20
20.1.7	stress.biotic.PR-proteins	95	<1E-20
20.1.4	stress.biotic.kinases	11	4.56e-05
26.9	misc.glutathione S transferases	25	0.00795
1	PS	123	<1E-20
1.1	PS.lightreaction	95	<1E-20
1.1.1	PS.lightreaction.photosystem II	42	4.5e-13
1.1.1.1	PS.lightreaction.photosystem II.LHC-II	10	0.000167
1.1.1.2	PS.lightreaction.photosystem II.PSII polypeptide subunits	32	9.93e-09
1.1.2	PS.lightreaction.photosystem I	25	1.01e-08
1.1.2.2	PS.lightreaction.photosystem I.PSI polypeptide subunits	19	4.83e-08
1.1.4	PS.lightreaction.ATP synthase	7	0.0449
29.2	protein.synthesis	157	5.36e-16
29.2.1	protein.synthesis.ribosomal protein	133	8.4e-17
29.2.1.2	protein.synthesis.ribosomal protein.eukaryotic	77	3.7e-06
29.2.1.2.2	protein.synthesis.ribosomal protein.eukaryotic.60S subunit	57	5.67e-05
29.2.1.1	protein.synthesis.ribosomal protein.prokaryotic	51	5.6e-12
29.2.1.1.1	protein.synthesis.ribosomal protein.prokaryotic.chloroplast	39	4.07e-09
29.2.1.1.1.2	protein.synthesis.ribosomal protein.prokaryotic.chloroplast.50S subunit	28	1.41e-06
29.2.1.1.1.1	protein.synthesis.ribosomal protein.prokaryotic.chloroplast.30S subunit	12	0.00437
29.2.1.1.2	protein.synthesis.ribosomal protein.prokaryotic.mitochondrion	7	0.00606
29.4	protein.postranslational modification	183	3.19e-06
29.4.1	protein.postranslational modification.kinase	44	0.0434
29.4.1.57	protein.postranslational modification.kinase.receptor like cytoplasmatic kinase VII	13	0.0229
29.5.9	protein.degradation.AAA type	13	0.0145
31	cell	200	3.7e-06
31.3	cell.cycle	40	3.41e-05
31.1	cell.organisation	115	0.00422
31.2	cell.division	28	0.0102
28	DNA	127	1.66e-15
28.1	DNA.synthesis/chromatin structure	88	8.4e-17
28.1.3	DNA.synthesis/chromatin structure.histone	43	3.1e-15
28.1.3.2	DNA.synthesis/chromatin structure.histone.core	39	1.71e-13
28.1.3.2.1	DNA.synthesis/chromatin structure.histone.core.H2A	16	3.4e-05
28.1.3.2.3	DNA.synthesis/chromatin structure.histone.core.H3	11	4.32e-05
28.1.3.2.4	DNA.synthesis/chromatin structure.histone.core.H4	11	0.000173
27.3.50	RNA.regulation of transcription.General Transcription	12	0.00934
27.3.64	RNA.regulation of transcription.PHOR1	8	0.00606
27.3.32	RNA.regulation of transcription.WRKY domain transcription factor family	31	7.92e-05
30	signalling	415	4.5e-13
30.3	signalling.calcium	91	0.00139
30.2	signalling.receptor kinases	204	2.86e-09
30.2.12	signalling.receptor kinases.leucine rich repeat XII	25	0.000125
30.2.24	signalling.receptor kinases.S-locus glycoprotein like	22	0.000382
30.2.17	signalling.receptor kinases.DUF 26	14	0.00188
30.2.11	signalling.receptor kinases.leucine rich repeat XI	27	0.00424
30.2.20	signalling.receptor kinases.wheat LRK10 like	15	0.00488
30.2.16	signalling.receptor kinases.Catharanthus roseus-like RLK1	15	0.0186
30.2.10	signalling.receptor kinases.leucine rich repeat X	10	0.0207
30.2.99	signalling.receptor kinases.misc	16	0.0449
33	development	202	0.0449
33.99	development.unspecified	181	0.0297
34	transport	332	1.58e-13
34.13	transport.peptides and oligopeptides	30	0.000289
34.7	transport.phosphate	10	0.012
34.4	transport.nitrate	10	0.0312
34.12	transport.metal	22	0.0317
34.21	transport.calcium	8	0.0416
9.7	mitochondrial electron transport / ATP synthesis.cytochrome c oxidase	7	0.0034
9	mitochondrial electron transport / ATP synthesis	28	0.00735
17	hormone metabolism	228	1.47e-06
17.5	hormone metabolism.ethylene	44	0.0199
17.5.1	hormone metabolism.ethylene.synthesis-degradation	19	0.00437
17.5.1.1	hormone metabolism.ethylene.synthesis-degradation.1-aminocyclopropane-1-carboxylate synthase	6	0.0237
17.6.2	hormone metabolism.gibberelin.signal transduction	5	0.0223
17.2	hormone metabolism.auxin	45	0.0225
11.1	lipid metabolism.FA synthesis and FA elongation	46	0.000216
11.1.10	lipid metabolism.FA synthesis and FA elongation.beta ketoacyl CoA synthase	6	0.0357
11.9.3	lipid metabolism.lipid degradation.lysophospholipases	26	0.039
16.7	secondary metabolism.wax	10	0.00766
35.1.26	not assigned.no ontology.DC1 domain containing protein	7	0.00375

## Sheet: mapman_enrichment_M_vs_C
bin	name	elements	p-value
31.3	cell.cycle	40	0.0144

## Sheet: mapman_enrichment_MV_vs_C
bin	name	elements	p-value
20.1	stress.biotic	179	0.0401
20.1.7	stress.biotic.PR-proteins	95	0.000578
29.2.1.2	protein.synthesis.ribosomal protein.eukaryotic	77	1.05e-10
29.2.1	protein.synthesis.ribosomal protein	133	5.75e-09
29.2.1.2.2	protein.synthesis.ribosomal protein.eukaryotic.60S subunit	57	1.54e-08
29.2	protein.synthesis	157	8.53e-07
29.2.1.2.1	protein.synthesis.ribosomal protein.eukaryotic.40S subunit	20	0.027
29.4	protein.postranslational modification	183	0.027
28.1.3	DNA.synthesis/chromatin structure.histone	43	0.00273
28.1.3.2	DNA.synthesis/chromatin structure.histone.core	39	0.0163
27.3.7	RNA.regulation of transcription.C2C2(Zn) CO-like, Constans-like zinc finger family	14	0.0308
27.3.85	RNA.regulation of transcription.sigma like plant	5	0.0303
30.2.99	signalling.receptor kinases.misc	16	0.0457
34	transport	332	6.76e-05
34.12	transport.metal	22	0.0163
17.4	hormone metabolism.cytokinin	26	0.00241
17.4.1	hormone metabolism.cytokinin.synthesis-degradation	22	0.0116
11.1	lipid metabolism.FA synthesis and FA elongation	46	0.00855
13.2.6.3	amino acid metabolism.degradation.aromatic aa.tryptophan	8	0.0116
13.2.4	amino acid metabolism.degradation.branched chain group	8	0.015
13.2	amino acid metabolism.degradation	38	0.0353
2.2.2.1.2	major CHO metabolism.degradation.starch.starch cleavage.beta amylase	5	0.00952
2.2.2.1	major CHO metabolism.degradation.starch.starch cleavage	6	0.0266
2.1	major CHO metabolism.synthesis	10	0.0308
16.1.4	secondary metabolism.isoprenoids.carotenoids	10	0.0116
10.6	cell wall.degradation	43	0.00373
10	cell wall	133	0.0259
7	OPP	12	0.0136
7.1	OPP.oxidative PP	8	0.0337
35.1.5	not assigned.no ontology.pentatricopeptide (PPR) repeat-containing protein	29	0.0308
35.1.22	not assigned.no ontology.late embryogenesis abundant domain-containing protein	3	0.0383
35.1	not assigned.no ontology	348	0.0346
